# Supplementary material for: Proteogenomic Analysis of a Thermophilic Bacterial Consortium Adapted to Deconstruct Switchgrass
Source: PLoS One. 2013 Jul 19;8(7):e68465. doi: 10.1371/journal.pone.0068465 (PMC3716776; doi:10.1371/journal.pone.0068465)
Supplement: File S1 — Scaffold name, IMG Object ID, read coverage, GC%, length, and phylogenetic bin assignment for all the scaffolds in the assembled metagenome. (XLSX) [file pone.0068465.s001.xlsx]

## Sheet: Scaffolds
Scaffold	IMG Object ID	covg	GC%	length	bin
contig11265	2061977617	32.8	71.7	174661	Gemmatimonadetes
contig00082	2061986190	34.4	70.9	158189	Gemmatimonadetes
contig18193	2061990899	37.3	71.2	157856	Gemmatimonadetes
contig00248	2061971541	32.4	70.5	133338	Gemmatimonadetes
contig00331	2061974247	38.9	71.1	110724	Gemmatimonadetes
contig00360	2061975272	34.9	71.7	102866	Gemmatimonadetes
contig00242	2061971500	36.9	71.7	100767	Gemmatimonadetes
contig00057	2061979052	31.8	71.5	95275	Gemmatimonadetes
contig18203	2061971226	35.6	71	88972	Gemmatimonadetes
contig00172	2061990312	34.1	71.4	84797	Gemmatimonadetes
contig00275	2061972402	36.6	71.7	84102	Gemmatimonadetes
contig13604	2061976978	32.5	71.6	83786	Gemmatimonadetes
contig00054	2061978170	31.3	71.7	82258	Gemmatimonadetes
contig04059	2061981143	31.3	72.2	80393	Gemmatimonadetes
contig00056	2061978611	35.1	72	71585	Gemmatimonadetes
contig00149	2061989820	37.5	72.3	70510	Gemmatimonadetes
contig18211	2061971595	34.3	70.3	69974	Gemmatimonadetes
contig00310	2061973427	31.7	70.8	66362	Gemmatimonadetes
contig00068	2061982180	35.1	69.3	65137	Gemmatimonadetes
contig00291	2061972853	37.8	71.3	64448	Gemmatimonadetes
contig14222	2061984998	36.3	71.3	63806	Gemmatimonadetes
contig00303	2061973181	35.1	71.8	63167	Gemmatimonadetes
contig00036	2061973222	38.5	71.3	60887	Gemmatimonadetes
contig18214	2061971718	32.3	71.9	60639	Gemmatimonadetes
contig00418	2061977529	35.2	72	60274	Gemmatimonadetes
contig18215	2061971759	31.8	69.8	59660	Gemmatimonadetes
contig14904	2061971224	32.5	71.5	59588	Gemmatimonadetes
contig00452	2061978892	35.6	72.2	58884	Gemmatimonadetes
contig00251	2061971623	36	71	57694	Gemmatimonadetes
contig00249	2061971582	37.6	71.1	55718	Gemmatimonadetes
contig00096	2061987954	35.6	72	54925	Gemmatimonadetes
contig00391	2061976447	32.8	71.4	52813	Gemmatimonadetes
contig13481	2061974831	37.9	71.5	50386	Gemmatimonadetes
contig00532	2061982140	36.7	70.9	49847	Gemmatimonadetes
contig00040	2061974575	38.2	71.1	49493	Gemmatimonadetes
contig06764	2061984713	31.2	71.5	48832	Gemmatimonadetes
contig00414	2061977369	35.8	71.8	46999	Gemmatimonadetes
contig00053	2061977729	35.6	72.1	41363	Gemmatimonadetes
contig05372	2061973843	33.5	71.8	39208	Gemmatimonadetes
contig00381	2061976086	32.3	71.7	38322	Gemmatimonadetes
contig00319	2061973755	35.1	72.5	37403	Gemmatimonadetes
contig00279	2061972484	31.3	72.5	35992	Gemmatimonadetes
contig00294	2061972894	36.6	70.5	35781	Gemmatimonadetes
contig13406	2061973601	31.4	71.5	34606	Gemmatimonadetes
contig00260	2061971951	35.9	71.5	34242	Gemmatimonadetes
contig02717	2061987998	32.5	72.2	30971	Gemmatimonadetes
contig18246	2061973153	29.5	71.8	30158	Gemmatimonadetes
contig05452	2061974499	32.6	72.7	30022	Gemmatimonadetes
contig00446	2061978692	31.4	70.5	28314	Gemmatimonadetes
contig00314	2061973591	32.1	71.6	27768	Gemmatimonadetes
contig13491	2061975077	36	71.7	26075	Gemmatimonadetes
contig18270	2061974260	35.5	71	25451	Gemmatimonadetes
contig09023	2061977336	31.4	71.6	23978	Gemmatimonadetes
contig04211	2061983709	34.3	71.5	23780	Gemmatimonadetes
contig11172	2061976094	35.5	68.6	23310	Gemmatimonadetes
contig04681	2061984391	36.9	71.2	23134	Gemmatimonadetes
contig15932	2061982232	31.7	72.4	23065	Gemmatimonadetes
contig08223	2061972491	35.8	71.4	22000	Gemmatimonadetes
contig10080	2061982949	30	72.3	18809	Gemmatimonadetes
contig00005	2061975477	36.8	71.4	18710	Gemmatimonadetes
contig00519	2061981619	33.2	70.8	17863	Gemmatimonadetes
contig00512	2061981379	37.3	71.1	15734	Gemmatimonadetes
contig00322	2061973837	37.1	69.8	14648	Gemmatimonadetes
contig00002	2061970926	34.1	71.7	14059	Gemmatimonadetes
contig00164	2061990148	33.7	67.7	12816	Gemmatimonadetes
contig18420	2061980991	30.8	72.4	12213	Gemmatimonadetes
contig00301	2061973140	32.9	73.9	12191	Gemmatimonadetes
contig00130	2061989369	31.4	73.2	11598	Gemmatimonadetes
contig16693	2061990283	32.8	71.8	11548	Gemmatimonadetes
contig00365	2061975395	37.1	73.4	11451	Gemmatimonadetes
contig15200	2061974504	27.1	72.1	11257	Gemmatimonadetes
contig00566	2061983343	34	72.1	9763	Gemmatimonadetes
contig18554	2061986925	34.1	71	9219	Gemmatimonadetes
contig00034	2061972771	33.2	71.9	8045	Gemmatimonadetes
contig18839	2061977383	23.2	69.7	6327	Gemmatimonadetes
contig00029	2061971869	28.1	70	6001	Gemmatimonadetes
contig00041	2061975026	27.2	72.5	4769	Gemmatimonadetes
contig19246	2061973155	25.1	72.1	4507	Gemmatimonadetes
contig19747	2061973197	46.9	73.5	3202	Gemmatimonadetes
contig00058	2061979493	26	71.1	3152	Gemmatimonadetes
contig16416	2061988848	27.7	70.2	2739	Gemmatimonadetes
contig19886	2061979429	23.4	69.2	2471	Gemmatimonadetes
contig12371	2061972083	49.1	68.4	1881	Gemmatimonadetes
contig20711	2061971600	32.9	67.7	1784	Gemmatimonadetes
contig20803	2061975741	45.2	66.7	1347	Gemmatimonadetes
contig16403	2061988727	47.2	66	1313	Gemmatimonadetes
contig16654	2061989955	37.9	65.8	1030	Gemmatimonadetes
contig11376	2061979261	5.6	58.4	56846	Hyphomicrobium
contig18224	2061972169	5.8	61.5	46823	Hyphomicrobium
contig18227	2061972292	5.8	59.6	43089	Hyphomicrobium
contig18225	2061972210	6	60.7	42890	Hyphomicrobium
contig18228	2061972374	5.7	61.2	39702	Hyphomicrobium
contig18230	2061972456	6.1	57.8	38713	Hyphomicrobium
contig18231	2061972497	5.8	59.9	35805	Hyphomicrobium
contig18239	2061972866	5.3	61.4	33109	Hyphomicrobium
contig18236	2061972702	5.9	60.5	32714	Hyphomicrobium
contig18237	2061972743	6	61.5	32240	Hyphomicrobium
contig18251	2061973399	5.4	60.5	29425	Hyphomicrobium
contig18252	2061973440	5.2	60.2	28299	Hyphomicrobium
contig11416	2061979902	6.9	55	27883	Hyphomicrobium
contig00543	2061982541	7.3	58.6	26613	Hyphomicrobium
contig18259	2061973768	6	59.7	26483	Hyphomicrobium
contig18260	2061973809	5.5	59.2	25827	Hyphomicrobium
contig18266	2061974055	5.1	62.3	25792	Hyphomicrobium
contig18264	2061973973	5.5	61.1	25739	Hyphomicrobium
contig18262	2061973891	5.7	57.9	25661	Hyphomicrobium
contig18271	2061974301	5.5	61.8	25528	Hyphomicrobium
contig18265	2061974014	6	55.9	25388	Hyphomicrobium
contig01484	2061971748	6	60.4	25173	Hyphomicrobium
contig02036	2061989741	4.4	59	24639	Hyphomicrobium
contig00204	2061990886	8.9	56.5	24225	Hyphomicrobium
contig01430	2061990109	5.2	57.6	23716	Hyphomicrobium
contig18275	2061974465	5.5	59.5	23281	Hyphomicrobium
contig18277	2061974547	6.2	61.4	22829	Hyphomicrobium
contig18286	2061974957	5.4	61.4	22630	Hyphomicrobium
contig18279	2061974670	6	60.3	22033	Hyphomicrobium
contig18281	2061974752	6.2	60.2	21824	Hyphomicrobium
contig18285	2061974916	5.8	61.6	21298	Hyphomicrobium
contig18290	2061975162	6.5	59.2	21195	Hyphomicrobium
contig18288	2061975080	5.4	59.8	20604	Hyphomicrobium
contig18301	2061975695	5.8	62.5	19607	Hyphomicrobium
contig15118	2061973725	5.6	62.3	19397	Hyphomicrobium
contig18297	2061975449	9	54.4	19385	Hyphomicrobium
contig18311	2061976139	4.9	61.3	19348	Hyphomicrobium
contig01275	2061986953	5.7	60	19286	Hyphomicrobium
contig18298	2061975572	6.1	59.5	19097	Hyphomicrobium
contig18300	2061975654	5.1	58.1	19027	Hyphomicrobium
contig10798	2061985757	8.7	58.9	18762	Hyphomicrobium
contig18303	2061975777	5.2	61.6	18732	Hyphomicrobium
contig18306	2061975898	4.1	61.8	18467	Hyphomicrobium
contig13961	2061981830	5.5	60.9	18440	Hyphomicrobium
contig13874	2061980747	5.9	56.9	18288	Hyphomicrobium
contig01486	2061971830	7.9	47.7	18234	Hyphomicrobium
contig18316	2061976339	5.8	60.8	18225	Hyphomicrobium
contig18309	2061976059	5.8	61.7	18016	Hyphomicrobium
contig18325	2061976740	5.2	59.8	17806	Hyphomicrobium
contig18318	2061976460	12.4	58.4	17151	Hyphomicrobium
contig15466	2061976939	5.9	58.4	17100	Hyphomicrobium
contig18353	2061977983	5	57.6	17100	Hyphomicrobium
contig01481	2061971666	5.2	62	16840	Hyphomicrobium
contig00424	2061977810	12.3	57.2	16693	Hyphomicrobium
contig02081	2061986193	5.9	59.4	16444	Hyphomicrobium
contig18334	2061977141	5.5	61.6	16414	Hyphomicrobium
contig02080	2061985752	5.7	60.3	15884	Hyphomicrobium
contig18329	2061976941	6.1	61.1	15846	Hyphomicrobium
contig18354	2061978023	4.8	62.9	15808	Hyphomicrobium
contig18365	2061978504	4.8	62.5	15704	Hyphomicrobium
contig18349	2061977823	5.5	59.5	15632	Hyphomicrobium
contig18339	2061977382	5.8	60.2	15374	Hyphomicrobium
contig00588	2061984105	5.8	60.9	15128	Hyphomicrobium
contig18347	2061977702	6.5	59.8	15054	Hyphomicrobium
contig18367	2061978584	5.8	59.3	15026	Hyphomicrobium
contig15312	2061975365	5.2	60.2	15018	Hyphomicrobium
contig18348	2061977783	5.4	61	14899	Hyphomicrobium
contig18355	2061978063	5.1	57.2	14705	Hyphomicrobium
contig18363	2061978424	5.6	61.3	14589	Hyphomicrobium
contig18427	2061981271	4.8	59.5	14401	Hyphomicrobium
contig18372	2061978825	5.3	61.3	14156	Hyphomicrobium
contig18405	2061980309	5.5	56.3	14061	Hyphomicrobium
contig18378	2061979106	5.5	60	13885	Hyphomicrobium
contig16078	2061984196	11.9	58.2	13870	Hyphomicrobium
contig17715	2061985842	10.5	59.9	13839	Hyphomicrobium
contig18430	2061981432	4.9	62.5	13499	Hyphomicrobium
contig01976	2061987475	5.1	61.8	13497	Hyphomicrobium
contig14387	2061987243	4.5	62.7	13493	Hyphomicrobium
contig14834	2061990569	6.1	59.8	13446	Hyphomicrobium
contig18384	2061979346	8.8	53.4	13427	Hyphomicrobium
contig18410	2061980550	5.2	62.1	13418	Hyphomicrobium
contig18387	2061979466	6.2	62.4	13291	Hyphomicrobium
contig18389	2061979587	6.2	59.3	13209	Hyphomicrobium
contig18392	2061979707	5.4	62.2	13105	Hyphomicrobium
contig01595	2061975602	5.3	60	13060	Hyphomicrobium
contig14915	2061971388	5.6	62.9	12994	Hyphomicrobium
contig00482	2061980176	5.6	60.5	12892	Hyphomicrobium
contig18399	2061980069	6.2	59.2	12883	Hyphomicrobium
contig18415	2061980750	5.5	59.1	12781	Hyphomicrobium
contig01331	2061989289	5.5	60.2	12755	Hyphomicrobium
contig04372	2061985634	8.7	55.8	12662	Hyphomicrobium
contig16137	2061985159	9.8	57.4	12655	Hyphomicrobium
contig01254	2061986272	5.4	60.8	12652	Hyphomicrobium
contig14852	2061990774	5.7	61.8	12599	Hyphomicrobium
contig18442	2061981953	4.5	62.2	12340	Hyphomicrobium
contig18412	2061980630	5.1	60.8	12258	Hyphomicrobium
contig18416	2061980790	6	58.8	12140	Hyphomicrobium
contig18414	2061980710	5.5	57.4	12052	Hyphomicrobium
contig18418	2061980911	8.9	53.8	12039	Hyphomicrobium
contig01965	2061987235	5.6	56.2	11854	Hyphomicrobium
contig18434	2061981592	5.1	61.9	11794	Hyphomicrobium
contig01244	2061985871	5	60.8	11700	Hyphomicrobium
contig18435	2061981632	5.9	61.2	11684	Hyphomicrobium
contig01588	2061975274	5.5	62.1	11656	Hyphomicrobium
contig14541	2061970937	5.3	59.5	11576	Hyphomicrobium
contig18437	2061981712	5.4	62.2	11567	Hyphomicrobium
contig18439	2061981833	5.7	56.4	11545	Hyphomicrobium
contig01257	2061986392	5.8	62.3	11393	Hyphomicrobium
contig14544	2061975488	6	61.7	11324	Hyphomicrobium
contig15368	2061975936	5.3	60.7	11223	Hyphomicrobium
contig18505	2061984760	4.3	61.2	11159	Hyphomicrobium
contig00582	2061983864	5.6	59.3	11109	Hyphomicrobium
contig18478	2061983557	4.5	62.2	11109	Hyphomicrobium
contig18460	2061982755	7.7	56	11098	Hyphomicrobium
contig15576	2061978262	5.8	60.9	11093	Hyphomicrobium
contig18453	2061982434	4.8	60.7	11083	Hyphomicrobium
contig18456	2061982554	4.9	61.8	11000	Hyphomicrobium
contig16092	2061984316	7.9	49.8	10944	Hyphomicrobium
contig18477	2061983476	5.4	61.9	10930	Hyphomicrobium
contig18523	2061985562	9.4	60.7	10839	Hyphomicrobium
contig01617	2061976288	6.1	62.7	10729	Hyphomicrobium
contig01479	2061971625	5.4	62	10662	Hyphomicrobium
contig18502	2061984640	5.4	62	10634	Hyphomicrobium
contig18475	2061983396	5.2	61.9	10537	Hyphomicrobium
contig01576	2061974946	5.6	59.7	10490	Hyphomicrobium
contig01433	2061990232	5.2	59.9	10482	Hyphomicrobium
contig15710	2061979625	5.2	63.1	10456	Hyphomicrobium
contig12841	2061981949	4.7	64.5	10368	Hyphomicrobium
contig18482	2061983717	4.6	61.9	10368	Hyphomicrobium
contig01953	2061986874	4.6	62.2	10256	Hyphomicrobium
contig18480	2061983637	6	62.1	10199	Hyphomicrobium
contig18493	2061984198	8.1	54.1	10198	Hyphomicrobium
contig18518	2061985362	7.2	60.9	10196	Hyphomicrobium
contig18551	2061986805	4.8	57	10163	Hyphomicrobium
contig18528	2061985803	8.2	52.8	10107	Hyphomicrobium
contig12837	2061981789	8.1	54.2	10091	Hyphomicrobium
contig18491	2061984118	5.1	61.3	10086	Hyphomicrobium
contig18564	2061987366	4.4	61.3	10084	Hyphomicrobium
contig18486	2061983877	6.4	62.1	10036	Hyphomicrobium
contig15496	2061977179	7	62	10009	Hyphomicrobium
contig18496	2061984318	5.5	55.2	9984	Hyphomicrobium
contig02078	2061984870	5.1	61.7	9955	Hyphomicrobium
contig18512	2061985081	10.4	54.6	9918	Hyphomicrobium
contig18716	2061971801	4.6	61.9	9900	Hyphomicrobium
contig18534	2061986043	5	60.5	9895	Hyphomicrobium
contig18494	2061984238	6.2	59.2	9890	Hyphomicrobium
contig00423	2061977770	10.4	58	9865	Hyphomicrobium
contig01921	2061985872	5.8	61.3	9822	Hyphomicrobium
contig16747	2061971020	12.2	59.8	9741	Hyphomicrobium
contig15102	2061973479	5.7	59.4	9699	Hyphomicrobium
contig08317	2061973065	5.1	57.2	9681	Hyphomicrobium
contig18510	2061985001	8	53.7	9667	Hyphomicrobium
contig18587	2061988368	5.7	58.6	9556	Hyphomicrobium
contig18558	2061987126	5.2	62.3	9505	Hyphomicrobium
contig18517	2061985281	5.4	61.4	9484	Hyphomicrobium
contig09971	2061982228	5	60	9450	Hyphomicrobium
contig01483	2061971707	4.9	60.5	9427	Hyphomicrobium
contig14756	2061989421	5.3	55.8	9344	Hyphomicrobium
contig01330	2061988838	5.2	62.5	9316	Hyphomicrobium
contig18604	2061989301	4.6	61.4	9256	Hyphomicrobium
contig15287	2061975160	4.7	61.8	9231	Hyphomicrobium
contig18531	2061985923	5.9	59.5	9150	Hyphomicrobium
contig01839	2061983225	4	58.7	9072	Hyphomicrobium
contig15505	2061977380	5.9	60.8	9016	Hyphomicrobium
contig01959	2061987034	5.6	61.7	8993	Hyphomicrobium
contig15416	2061976458	4.4	61.6	8983	Hyphomicrobium
contig18560	2061987206	5.4	58.1	8959	Hyphomicrobium
contig15399	2061976377	5	61.1	8939	Hyphomicrobium
contig14524	2061988646	5	57.8	8918	Hyphomicrobium
contig14993	2061972167	6.7	58.5	8692	Hyphomicrobium
contig01804	2061982223	5.1	61.3	8669	Hyphomicrobium
contig12908	2061983673	5.7	61.5	8559	Hyphomicrobium
contig01070	2061979414	4.9	57.8	8468	Hyphomicrobium
contig00374	2061975845	8	53.2	8362	Hyphomicrobium
contig01904	2061985230	5.7	62.5	8298	Hyphomicrobium
contig01912	2061985551	5.2	59.5	8267	Hyphomicrobium
contig18617	2061975040	4.4	61.7	8123	Hyphomicrobium
contig00869	2061972239	4.7	60.6	8099	Hyphomicrobium
contig18694	2061990941	5.3	58.2	8090	Hyphomicrobium
contig02016	2061988758	5	61.8	8049	Hyphomicrobium
contig18633	2061982194	4.9	60.4	8022	Hyphomicrobium
contig15010	2061972372	4.6	60.3	7977	Hyphomicrobium
contig14573	2061990651	5.4	56.1	7969	Hyphomicrobium
contig18735	2061972662	4.5	60.2	7937	Hyphomicrobium
contig01782	2061981581	5.1	59.2	7909	Hyphomicrobium
contig18637	2061983958	5.7	61.6	7899	Hyphomicrobium
contig01718	2061979616	5.1	59.7	7886	Hyphomicrobium
contig18661	2061989465	4.9	61.8	7859	Hyphomicrobium
contig18663	2061989547	4.9	61.3	7811	Hyphomicrobium
contig18649	2061988932	9.8	57.8	7782	Hyphomicrobium
contig01485	2061971789	4.6	56.4	7761	Hyphomicrobium
contig18782	2061974794	4.9	61.2	7761	Hyphomicrobium
contig00379	2061976006	7.7	52.3	7760	Hyphomicrobium
contig01247	2061985991	4.5	61.4	7678	Hyphomicrobium
contig18643	2061986645	8.1	55.5	7675	Hyphomicrobium
contig02072	2061982183	5.3	61.4	7616	Hyphomicrobium
contig02432	2061978975	4.5	63.8	7593	Hyphomicrobium
contig15788	2061980588	4.8	60.5	7502	Hyphomicrobium
contig18703	2061971227	3.2	60.1	7469	Hyphomicrobium
contig18816	2061976340	4.5	61.1	7443	Hyphomicrobium
contig13189	2061985318	5.6	61.2	7439	Hyphomicrobium
contig01272	2061986873	5.5	61.3	7430	Hyphomicrobium
contig18678	2061990244	5.2	60.1	7413	Hyphomicrobium
contig18665	2061989629	5	62.1	7407	Hyphomicrobium
contig00471	2061979654	5.2	61.2	7406	Hyphomicrobium
contig15299	2061975242	5.9	63.7	7398	Hyphomicrobium
contig18886	2061979427	5.2	57.5	7338	Hyphomicrobium
contig01219	2061984989	5.1	59.8	7270	Hyphomicrobium
contig08920	2061976814	4.3	50.3	7225	Hyphomicrobium
contig18873	2061978866	5.1	60.1	7200	Hyphomicrobium
contig19007	2061984841	2.8	57.8	7199	Hyphomicrobium
contig18706	2061971350	5.5	61.9	7135	Hyphomicrobium
contig14367	2061986962	4.8	59.5	7132	Hyphomicrobium
contig12309	2061971017	11.2	57.3	7126	Hyphomicrobium
contig18714	2061971719	5	60.8	7028	Hyphomicrobium
contig18762	2061973892	7.8	51.7	6912	Hyphomicrobium
contig01596	2061975643	5.8	59.4	6897	Hyphomicrobium
contig01915	2061985631	5.5	61.5	6890	Hyphomicrobium
contig01927	2061986032	6.2	58.6	6870	Hyphomicrobium
contig01683	2061978413	5.4	58.8	6857	Hyphomicrobium
contig18767	2061974097	5	60.8	6851	Hyphomicrobium
contig01229	2061985390	4.5	61.8	6844	Hyphomicrobium
contig13864	2061980587	5.1	62	6836	Hyphomicrobium
contig15087	2061973315	6.8	59.3	6836	Hyphomicrobium
contig18764	2061973974	5.8	57.8	6835	Hyphomicrobium
contig02774	2061973226	5.2	60.3	6814	Hyphomicrobium
contig15113	2061973643	4.3	61.2	6775	Hyphomicrobium
contig18757	2061973646	5.2	59.2	6767	Hyphomicrobium
contig18857	2061978144	4.5	58.2	6757	Hyphomicrobium
contig01168	2061983023	5.5	60.3	6677	Hyphomicrobium
contig18745	2061973113	6.4	60.7	6631	Hyphomicrobium
contig18901	2061980150	4.2	62.2	6628	Hyphomicrobium
contig14301	2061985880	4.3	61.9	6613	Hyphomicrobium
contig18790	2061975163	9	58	6604	Hyphomicrobium
contig01328	2061979936	5	60.9	6555	Hyphomicrobium
contig14227	2061985118	5.3	61.2	6505	Hyphomicrobium
contig18827	2061976821	4.9	61.2	6494	Hyphomicrobium
contig01435	2061990314	4.9	62	6475	Hyphomicrobium
contig14777	2061989790	4.8	60.4	6435	Hyphomicrobium
contig18831	2061977022	4.8	61.1	6402	Hyphomicrobium
contig01988	2061987876	5.8	61.2	6384	Hyphomicrobium
contig06806	2061985194	5.1	60	6353	Hyphomicrobium
contig14791	2061989954	5.7	59.7	6336	Hyphomicrobium
contig18807	2061975939	5.8	62.1	6318	Hyphomicrobium
contig01035	2061978412	4.3	52.2	6312	Hyphomicrobium
contig01775	2061981381	4.7	61	6308	Hyphomicrobium
contig01053	2061978933	3.9	62.4	6300	Hyphomicrobium
contig18838	2061977343	6.2	62.7	6274	Hyphomicrobium
contig01920	2061985832	5.9	60.5	6260	Hyphomicrobium
contig01645	2061977250	3.9	56.1	6245	Hyphomicrobium
contig14166	2061984275	4.6	60.9	6201	Hyphomicrobium
contig18821	2061976581	8.6	55.9	6197	Hyphomicrobium
contig01833	2061983024	4.5	64.2	6180	Hyphomicrobium
contig01947	2061986674	6.1	61.9	6177	Hyphomicrobium
contig16742	2061990980	3.5	58.5	6169	Hyphomicrobium
contig18982	2061983718	5.2	59.8	6026	Hyphomicrobium
contig01895	2061984990	5.1	63.1	5979	Hyphomicrobium
contig18868	2061978666	5.7	63	5965	Hyphomicrobium
contig10819	2061989090	7.7	53.2	5936	Hyphomicrobium
contig18880	2061979187	6.4	55.3	5934	Hyphomicrobium
contig00558	2061983103	5.2	61.6	5924	Hyphomicrobium
contig10095	2061983190	5.1	57.5	5876	Hyphomicrobium
contig12716	2061978701	5.6	55.6	5848	Hyphomicrobium
contig18908	2061980471	7.4	62.8	5814	Hyphomicrobium
contig15551	2061978061	5.2	61.1	5809	Hyphomicrobium
contig18981	2061983678	4.4	62.1	5764	Hyphomicrobium
contig00661	2061986872	5.4	55.3	5744	Hyphomicrobium
contig14826	2061990446	6	60.1	5725	Hyphomicrobium
contig01902	2061985150	4.8	61.7	5707	Hyphomicrobium
contig12974	2061985358	4.7	62.3	5703	Hyphomicrobium
contig00023	2061990640	5	55.5	5695	Hyphomicrobium
contig01931	2061986152	5.7	61.7	5691	Hyphomicrobium
contig00660	2061986832	2.6	59.1	5653	Hyphomicrobium
contig00522	2061981780	6.4	53.2	5642	Hyphomicrobium
contig14432	2061987724	4.8	60.5	5629	Hyphomicrobium
contig00735	2061975519	6.5	61.2	5613	Hyphomicrobium
contig01378	2061985310	5.9	61.4	5552	Hyphomicrobium
contig11423	2061980104	4.2	53.2	5547	Hyphomicrobium
contig18984	2061983798	4	63	5525	Hyphomicrobium
contig19002	2061984641	9.9	57.9	5521	Hyphomicrobium
contig18906	2061980350	5.9	59.1	5486	Hyphomicrobium
contig13770	2061979223	4.8	61.3	5435	Hyphomicrobium
contig14315	2061986160	4.6	60	5415	Hyphomicrobium
contig15499	2061977259	3.7	62	5400	Hyphomicrobium
contig19320	2061976542	3.4	60.1	5391	Hyphomicrobium
contig01322	2061988717	4.2	62.3	5388	Hyphomicrobium
contig00935	2061974699	4.2	56.7	5373	Hyphomicrobium
contig19003	2061984681	4.5	62.4	5372	Hyphomicrobium
contig15122	2061973766	4.7	59.9	5359	Hyphomicrobium
contig00325	2061973960	4.1	61.6	5322	Hyphomicrobium
contig01245	2061985911	4.9	61.2	5309	Hyphomicrobium
contig14907	2061971306	3.6	61.7	5305	Hyphomicrobium
contig01004	2061977169	6	61.8	5300	Hyphomicrobium
contig14061	2061982952	4.7	62.1	5292	Hyphomicrobium
contig11519	2061981547	4.9	61.8	5291	Hyphomicrobium
contig19110	2061971884	4.4	62.3	5281	Hyphomicrobium
contig00254	2061971746	4.3	61.8	5273	Hyphomicrobium
contig02070	2061981301	6.5	60.5	5270	Hyphomicrobium
contig15256	2061974791	5.4	62.1	5262	Hyphomicrobium
contig15005	2061972290	5.1	61.2	5244	Hyphomicrobium
contig16906	2061973070	4.9	60.8	5232	Hyphomicrobium
contig14536	2061988806	5.5	62.4	5227	Hyphomicrobium
contig15397	2061976297	4.6	57.7	5217	Hyphomicrobium
contig14589	2061973233	4.8	62.7	5192	Hyphomicrobium
contig01907	2061985391	4.3	60.2	5180	Hyphomicrobium
contig14823	2061990405	4.7	61.1	5169	Hyphomicrobium
contig15508	2061977460	5.3	59.2	5168	Hyphomicrobium
contig02054	2061975968	3.5	61.6	5111	Hyphomicrobium
contig02095	2061989044	4.6	60.1	5091	Hyphomicrobium
contig01323	2061988757	6	60.9	5084	Hyphomicrobium
contig19063	2061987327	6.1	61.5	5060	Hyphomicrobium
contig19061	2061987247	3.6	56	5037	Hyphomicrobium
contig01913	2061985591	5.3	60.5	5017	Hyphomicrobium
contig15815	2061980748	4.1	61.1	5012	Hyphomicrobium
contig19418	2061980913	3.2	53	4993	Hyphomicrobium
contig15609	2061978663	5	61.3	4972	Hyphomicrobium
contig15332	2061975734	4.6	60	4959	Hyphomicrobium
contig09741	2061980784	4.8	54.1	4946	Hyphomicrobium
contig00508	2061981218	8.3	52.5	4920	Hyphomicrobium
contig10857	2061989869	3.2	56.9	4896	Hyphomicrobium
contig11298	2061978219	5.9	63.7	4832	Hyphomicrobium
contig11952	2061987802	6.6	55.4	4802	Hyphomicrobium
contig13310	2061971387	4.1	60.8	4794	Hyphomicrobium
contig19229	2061972417	6.2	60.8	4794	Hyphomicrobium
contig02013	2061988638	4.5	51.9	4786	Hyphomicrobium
contig01824	2061982824	5.4	62.2	4753	Hyphomicrobium
contig00878	2061972649	4	57.9	4729	Hyphomicrobium
contig19116	2061974590	4.4	60	4726	Hyphomicrobium
contig01952	2061986834	5.5	64.1	4709	Hyphomicrobium
contig19208	2061971474	10.2	57.6	4706	Hyphomicrobium
contig19482	2061983719	3.7	60.3	4675	Hyphomicrobium
contig15756	2061980227	5.1	61.3	4654	Hyphomicrobium
contig14000	2061982351	4.7	61.4	4642	Hyphomicrobium
contig03411	2061986475	9.1	60.3	4632	Hyphomicrobium
contig19224	2061972171	3.5	59.5	4615	Hyphomicrobium
contig01040	2061978572	5.2	61.5	4557	Hyphomicrobium
contig19165	2061989630	4.1	61.6	4557	Hyphomicrobium
contig01240	2061985710	5.7	60.2	4553	Hyphomicrobium
contig14345	2061986481	5.5	59.4	4540	Hyphomicrobium
contig14468	2061988085	5.5	61.8	4536	Hyphomicrobium
contig01962	2061987155	6.2	60.1	4513	Hyphomicrobium
contig01813	2061982543	4.1	53.7	4500	Hyphomicrobium
contig19214	2061971720	5.2	63.3	4485	Hyphomicrobium
contig19176	2061990122	11.7	54.9	4470	Hyphomicrobium
contig19212	2061971638	7	55.8	4460	Hyphomicrobium
contig19323	2061976662	4.3	51.4	4407	Hyphomicrobium
contig01260	2061986472	5.6	60.1	4331	Hyphomicrobium
contig11012	2061973435	3.8	62.4	4329	Hyphomicrobium
contig19305	2061975860	7.2	62.9	4328	Hyphomicrobium
contig10982	2061972861	5	61.3	4326	Hyphomicrobium
contig00236	2061971295	4.7	57.2	4290	Hyphomicrobium
contig01056	2061979013	5.1	62.1	4290	Hyphomicrobium
contig15036	2061972823	5	61.4	4289	Hyphomicrobium
contig14097	2061983313	4.8	61.5	4286	Hyphomicrobium
contig13982	2061981950	4.6	57.1	4276	Hyphomicrobium
contig19332	2061977063	4.7	61.2	4237	Hyphomicrobium
contig14528	2061988686	4.1	61.4	4203	Hyphomicrobium
contig19230	2061972458	5	58.9	4178	Hyphomicrobium
contig15185	2061974299	4.9	61.7	4152	Hyphomicrobium
contig01755	2061980659	5.2	58.1	4068	Hyphomicrobium
contig17540	2061982794	9.6	60.7	4051	Hyphomicrobium
contig08092	2061971630	3.6	51	4042	Hyphomicrobium
contig01850	2061983586	5.6	59.8	4038	Hyphomicrobium
contig19735	2061972664	3.6	60.9	4032	Hyphomicrobium
contig19300	2061975656	6.4	58.5	4030	Hyphomicrobium
contig15026	2061972577	6.5	61	4012	Hyphomicrobium
contig19373	2061978867	5	58	4011	Hyphomicrobium
contig14958	2061971839	4.3	57.9	3985	Hyphomicrobium
contig15089	2061973356	4	59.9	3977	Hyphomicrobium
contig15098	2061973438	3.7	53.7	3971	Hyphomicrobium
contig19349	2061977825	4.6	55.8	3948	Hyphomicrobium
contig04016	2061980221	16.7	61.9	3947	Hyphomicrobium
contig14871	2061990938	3.3	60.2	3929	Hyphomicrobium
contig02684	2061986835	2.7	53.1	3914	Hyphomicrobium
contig01448	2061990806	6.1	62.5	3908	Hyphomicrobium
contig19355	2061978065	11.2	54.8	3887	Hyphomicrobium
contig15322	2061975611	5	59.1	3872	Hyphomicrobium
contig10334	2061985516	5	51	3867	Hyphomicrobium
contig01410	2061989494	4.8	60.7	3844	Hyphomicrobium
contig01922	2061985912	5.1	62.4	3836	Hyphomicrobium
contig13885	2061980988	4.3	59.6	3805	Hyphomicrobium
contig02074	2061983065	3.9	60.2	3804	Hyphomicrobium
contig00562	2061983183	3.6	59.9	3803	Hyphomicrobium
contig14698	2061985319	4.7	62.5	3787	Hyphomicrobium
contig01720	2061979696	6	60.2	3772	Hyphomicrobium
contig17702	2061985481	8.2	55.9	3752	Hyphomicrobium
contig19753	2061973484	7.5	59.7	3711	Hyphomicrobium
contig19372	2061978827	7.2	57.1	3676	Hyphomicrobium
contig00523	2061981820	6.7	59	3675	Hyphomicrobium
contig01391	2061988961	3.6	55.3	3649	Hyphomicrobium
contig17697	2061985361	7.2	55.6	3647	Hyphomicrobium
contig01226	2061985269	3.7	61.1	3619	Hyphomicrobium
contig01007	2061977330	4.9	59	3609	Hyphomicrobium
contig15662	2061979304	3.7	62.4	3599	Hyphomicrobium
contig15513	2061977500	5.3	60.2	3551	Hyphomicrobium
contig19958	2061982678	2.6	61.1	3536	Hyphomicrobium
contig09920	2061981827	4.3	59.3	3503	Hyphomicrobium
contig01477	2061971543	5.1	60.9	3484	Hyphomicrobium
contig15445	2061976738	3.5	58.2	3483	Hyphomicrobium
contig19516	2061985243	8.6	52.5	3428	Hyphomicrobium
contig07823	2061989950	4.7	55.3	3415	Hyphomicrobium
contig15205	2061974627	4.8	58.3	3407	Hyphomicrobium
contig19678	2061990246	18.8	60.7	3386	Hyphomicrobium
contig10961	2061972451	3.5	55.5	3384	Hyphomicrobium
contig10893	2061990894	4.6	52.3	3320	Hyphomicrobium
contig12697	2061978139	3.6	50.7	3298	Hyphomicrobium
contig01763	2061980940	4.6	60.8	3288	Hyphomicrobium
contig01246	2061985951	5	61.4	3272	Hyphomicrobium
contig19641	2061985765	4.5	61.6	3267	Hyphomicrobium
contig19545	2061986526	7.6	55.8	3261	Hyphomicrobium
contig01924	2061985952	5.6	60.2	3219	Hyphomicrobium
contig11764	2061985116	5.1	55.7	3181	Hyphomicrobium
contig14162	2061984155	4.8	62.1	3174	Hyphomicrobium
contig01946	2061986593	7.4	57.9	3134	Hyphomicrobium
contig08363	2061973393	2.8	54.7	3125	Hyphomicrobium
contig01418	2061989822	2.7	53.6	3089	Hyphomicrobium
contig15071	2061973274	5.5	61.6	3088	Hyphomicrobium
contig14792	2061989995	4	61.2	3087	Hyphomicrobium
contig01930	2061986112	4.2	62	3067	Hyphomicrobium
contig19600	2061975493	4.6	59.9	3067	Hyphomicrobium
contig03305	2061983347	5.7	57.9	3043	Hyphomicrobium
contig01773	2061981260	4.9	59.9	3030	Hyphomicrobium
contig15129	2061973930	4.8	46	3021	Hyphomicrobium
contig13521	2061975610	5	61.6	2990	Hyphomicrobium
contig01826	2061982864	4.3	59.1	2978	Hyphomicrobium
contig19698	2061971024	6.9	58.2	2952	Hyphomicrobium
contig14837	2061990610	2.5	52.8	2942	Hyphomicrobium
contig01383	2061987515	2.8	57.3	2917	Hyphomicrobium
contig01553	2061974044	3.8	58.2	2912	Hyphomicrobium
contig19876	2061978988	9.6	61.1	2886	Hyphomicrobium
contig20582	2061988172	3	62.6	2883	Hyphomicrobium
contig02392	2061977853	3	56.3	2847	Hyphomicrobium
contig01905	2061985270	2.2	53.3	2839	Hyphomicrobium
contig13471	2061974667	4.8	61.9	2813	Hyphomicrobium
contig01719	2061979656	4.8	61.1	2808	Hyphomicrobium
contig03016	2061974415	3.7	63.4	2790	Hyphomicrobium
contig19803	2061975780	4.7	58.6	2787	Hyphomicrobium
contig14032	2061982591	6.1	56.2	2775	Hyphomicrobium
contig02026	2061970929	5.7	59.9	2767	Hyphomicrobium
contig20020	2061985445	7.9	54.3	2726	Hyphomicrobium
contig01329	2061984387	4	60.8	2720	Hyphomicrobium
contig02208	2061972487	3.5	61.7	2706	Hyphomicrobium
contig02391	2061977813	3.6	51.1	2697	Hyphomicrobium
contig00559	2061983143	3.9	60.5	2676	Hyphomicrobium
contig19879	2061979149	8.6	56.3	2671	Hyphomicrobium
contig10879	2061990525	5.5	50.8	2543	Hyphomicrobium
contig11237	2061977216	7.7	47.7	2523	Hyphomicrobium
contig01380	2061986192	4.2	53	2515	Hyphomicrobium
contig05672	2061976733	4.1	59.2	2477	Hyphomicrobium
contig19996	2061984321	11.1	60.1	2465	Hyphomicrobium
contig00338	2061974493	4.6	49.6	2446	Hyphomicrobium
contig02402	2061978013	6.7	57.1	2444	Hyphomicrobium
contig20025	2061985645	12.7	52.3	2421	Hyphomicrobium
contig00960	2061975601	4.9	51.3	2390	Hyphomicrobium
contig01605	2061975887	3.7	58.2	2388	Hyphomicrobium
contig01140	2061982061	3.6	55.8	2362	Hyphomicrobium
contig02101	2061989249	3.9	58.1	2347	Hyphomicrobium
contig05287	2061973064	4.7	62.3	2325	Hyphomicrobium
contig11028	2061973804	4.5	54.4	2325	Hyphomicrobium
contig00647	2061986311	4.9	57.8	2311	Hyphomicrobium
contig20515	2061985205	2.9	57.3	2300	Hyphomicrobium
contig12280	2061990772	17.2	58	2295	Hyphomicrobium
contig03271	2061982144	3.8	56.6	2277	Hyphomicrobium
contig01436	2061990355	4.4	59.4	2266	Hyphomicrobium
contig00353	2061975067	3.5	53.4	2253	Hyphomicrobium
contig20207	2061971394	8.1	58.7	2243	Hyphomicrobium
contig07271	2061988522	5.1	54.4	2235	Hyphomicrobium
contig07436	2061975972	2.6	59.2	2209	Hyphomicrobium
contig00821	2061990682	4	57	2188	Hyphomicrobium
contig15434	2061976618	1.9	62.1	2165	Hyphomicrobium
contig05010	2061990277	4.1	57.4	2163	Hyphomicrobium
contig10008	2061982428	5.4	50	2158	Hyphomicrobium
contig09812	2061981145	3.3	58.4	2149	Hyphomicrobium
contig20338	2061977346	4.3	59.8	2149	Hyphomicrobium
contig01317	2061988557	4.5	59.5	2148	Hyphomicrobium
contig01551	2061973962	3	56.5	2137	Hyphomicrobium
contig01593	2061975438	3	60.2	2133	Hyphomicrobium
contig14945	2061971675	6.1	56	2128	Hyphomicrobium
contig14592	2061974135	4.2	60.5	2116	Hyphomicrobium
contig17201	2061977341	8.6	53.7	2108	Hyphomicrobium
contig02291	2061974660	3.3	50.6	2106	Hyphomicrobium
contig11532	2061981707	3.8	54	2088	Hyphomicrobium
contig20061	2061987249	11.4	56.5	2068	Hyphomicrobium
contig12067	2061973682	4.5	61.7	2037	Hyphomicrobium
contig01032	2061978292	3.7	52.2	2036	Hyphomicrobium
contig00767	2061986632	3.3	56.1	2034	Hyphomicrobium
contig20501	2061984604	2.9	53.8	2033	Hyphomicrobium
contig01181	2061983545	2.7	52.3	2030	Hyphomicrobium
contig01970	2061987315	3	50	2026	Hyphomicrobium
contig20403	2061980233	4.6	59.4	2016	Hyphomicrobium
contig20449	2061982278	12.7	60.2	2016	Hyphomicrobium
contig00399	2061976767	17.1	53.9	2002	Hyphomicrobium
contig02771	2061971873	4.6	56.5	1991	Hyphomicrobium
contig20543	2061986448	16.9	55.6	1989	Hyphomicrobium
contig01849	2061983546	3.4	60.2	1988	Hyphomicrobium
contig11947	2061987682	10.1	56.5	1982	Hyphomicrobium
contig12754	2061979663	5	53.4	1969	Hyphomicrobium
contig20285	2061974920	2.5	47.7	1964	Hyphomicrobium
contig02862	2061989660	2.6	56	1941	Hyphomicrobium
contig11643	2061983351	4.7	54.9	1941	Hyphomicrobium
contig11385	2061979421	16.4	61	1911	Hyphomicrobium
contig11460	2061980705	3.6	57.2	1892	Hyphomicrobium
contig10764	2061978619	5.1	52.3	1861	Hyphomicrobium
contig07865	2061990155	2.8	59.5	1851	Hyphomicrobium
contig14257	2061985479	5.5	56.9	1851	Hyphomicrobium
contig00474	2061979774	3.4	52.2	1819	Hyphomicrobium
contig20461	2061982799	15.7	62.7	1785	Hyphomicrobium
contig01438	2061990396	3.7	58.5	1776	Hyphomicrobium
contig17397	2061980549	3.2	58.6	1753	Hyphomicrobium
contig02032	2061988839	3.1	58.8	1749	Hyphomicrobium
contig10715	2061990197	5.5	54.4	1737	Hyphomicrobium
contig03409	2061986395	5.7	49.2	1728	Hyphomicrobium
contig10364	2061985797	3.3	58.7	1706	Hyphomicrobium
contig17160	2061976779	10.8	54.2	1704	Hyphomicrobium
contig20663	2061989551	8.8	47.1	1700	Hyphomicrobium
contig12813	2061981187	3.3	55	1697	Hyphomicrobium
contig03948	2061978657	2.6	54.9	1690	Hyphomicrobium
contig01598	2061975684	2.8	60.2	1664	Hyphomicrobium
contig20516	2061985245	7.9	56.3	1635	Hyphomicrobium
contig09249	2061978538	4.1	49.3	1631	Hyphomicrobium
contig06142	2061980342	2.3	56.9	1614	Hyphomicrobium
contig20612	2061972789	8.8	57.9	1589	Hyphomicrobium
contig01224	2061985189	3.4	61.2	1580	Hyphomicrobium
contig20867	2061978429	9.1	56.6	1525	Hyphomicrobium
contig14751	2061989339	3.6	60.3	1519	Hyphomicrobium
contig11415	2061979862	5.9	57.7	1486	Hyphomicrobium
contig13985	2061982030	7.9	51.3	1474	Hyphomicrobium
contig12665	2061977217	2.3	58.2	1453	Hyphomicrobium
contig05023	2061990441	6.6	52.3	1445	Hyphomicrobium
contig00975	2061976167	3.2	58.6	1444	Hyphomicrobium
contig13480	2061974790	2.9	55.5	1444	Hyphomicrobium
contig20833	2061976946	9.9	57.6	1420	Hyphomicrobium
contig01167	2061982983	4.4	62.7	1376	Hyphomicrobium
contig13369	2061972822	4.5	52.4	1269	Hyphomicrobium
contig01386	2061988397	2.4	55	1235	Hyphomicrobium
contig01382	2061987074	3.2	56.5	1229	Hyphomicrobium
contig03040	2061975112	2.4	53.3	1220	Hyphomicrobium
contig06069	2061979780	2.2	55.5	1169	Hyphomicrobium
contig04572	2061988160	3.3	53.7	1155	Hyphomicrobium
contig01612	2061976128	1.9	57.3	1151	Hyphomicrobium
contig03038	2061974989	2.5	55.5	1145	Hyphomicrobium
contig20958	2061982118	9.1	54.8	1145	Hyphomicrobium
contig20980	2061983040	5.5	58.8	1086	Hyphomicrobium
contig07067	2061986838	3.8	48.8	1045	Hyphomicrobium
contig04332	2061985394	6.9	59.1	1044	Hyphomicrobium
contig13093	2061988445	2.7	56.3	1024	Hyphomicrobium
contig00662	2061986912	7.6	62.1	55905	Not Binned
contig18217	2061971841	7.6	57.1	55018	Not Binned
contig13145	2061974585	7.7	60.5	54686	Not Binned
contig00870	2061972280	8.1	59.9	44732	Not Binned
contig18226	2061972251	7.3	62.2	42609	Not Binned
contig18229	2061972415	7.2	62	40360	Not Binned
contig04291	2061984672	7.2	62.8	31096	Not Binned
contig18243	2061973030	6.3	61.5	30904	Not Binned
contig18244	2061973071	6.6	61.2	30542	Not Binned
contig18245	2061973112	7.2	62.5	30402	Not Binned
contig18248	2061973276	6.9	61.6	29640	Not Binned
contig18249	2061973317	7	60.2	29367	Not Binned
contig00337	2061974452	7.3	61.5	26344	Not Binned
contig10892	2061990853	7.6	61.2	26062	Not Binned
contig00371	2061975723	7.4	59.9	25774	Not Binned
contig18268	2061974178	6.2	56.3	25378	Not Binned
contig00549	2061982702	7.1	62.8	25280	Not Binned
contig00050	2061977288	7.7	61.9	25200	Not Binned
contig18269	2061974219	7.5	61.1	24701	Not Binned
contig18272	2061974342	7.2	60.2	24384	Not Binned
contig18274	2061974424	6.9	60	24119	Not Binned
contig18282	2061974793	7.1	61.1	23190	Not Binned
contig18278	2061974629	7.1	62.5	22267	Not Binned
contig11464	2061980745	6.8	59.6	22141	Not Binned
contig18283	2061974834	68.3	58.6	21672	Not Binned
contig08412	2061973557	7.8	62	21542	Not Binned
contig16103	2061984598	7.4	57.3	20574	Not Binned
contig13194	2061986641	7.1	60.8	20437	Not Binned
contig18295	2061975367	7.1	59.2	20014	Not Binned
contig18291	2061975203	6.9	61.5	19895	Not Binned
contig12638	2061976375	4.2	60.5	19769	Not Binned
contig00289	2061972730	6.5	49.3	19714	Not Binned
contig00327	2061974042	7.5	59.8	19634	Not Binned
contig18293	2061975285	7.2	61	19492	Not Binned
contig18305	2061975858	77.8	62.4	18866	Not Binned
contig00614	2061985188	7.2	59.6	18447	Not Binned
contig00555	2061982942	8	60.5	18298	Not Binned
contig18312	2061976179	7.2	61.1	18011	Not Binned
contig00764	2061985309	7.2	61.2	17790	Not Binned
contig18314	2061976259	7	61.6	17485	Not Binned
contig18319	2061976500	83.5	63.1	17285	Not Binned
contig00706	2061988636	6	59.5	17266	Not Binned
contig01429	2061990068	7	59.9	17080	Not Binned
contig18315	2061976299	5	60.6	17022	Not Binned
contig00409	2061977128	8.8	59.1	17000	Not Binned
contig01957	2061986994	7.4	61.3	16754	Not Binned
contig15528	2061977781	7.9	60.8	16683	Not Binned
contig04126	2061982346	40.8	67.8	16393	Not Binned
contig00786	2061989411	5.9	63.5	16384	Not Binned
contig18323	2061976660	6.5	61.6	16313	Not Binned
contig18328	2061976901	6.4	61.2	16286	Not Binned
contig14822	2061990364	7.4	62.2	16244	Not Binned
contig13717	2061978461	7.2	59.8	16163	Not Binned
contig14002	2061982391	7.3	59.3	16086	Not Binned
contig13808	2061979744	6.7	60.9	16003	Not Binned
contig18332	2061977061	6.6	64	15878	Not Binned
contig18357	2061978143	6.7	58.9	15738	Not Binned
contig00675	2061987473	5.7	59.7	15685	Not Binned
contig18335	2061977181	7	61.6	15420	Not Binned
contig18340	2061977422	7.7	60.2	15181	Not Binned
contig12649	2061976776	8.6	60.6	15074	Not Binned
contig18342	2061977502	7.1	59.6	15047	Not Binned
contig18356	2061978103	133.2	61.5	15010	Not Binned
contig18376	2061978985	5.8	62	14946	Not Binned
contig18362	2061978384	60.2	54.3	14727	Not Binned
contig18352	2061977943	4.9	61.1	14573	Not Binned
contig00554	2061982902	7.2	62.4	14571	Not Binned
contig16948	2061973726	70.7	58.3	14547	Not Binned
contig18359	2061978264	7.2	56.1	14547	Not Binned
contig00538	2061982381	8.8	60.4	14535	Not Binned
contig16099	2061984518	7.4	56.2	14478	Not Binned
contig00672	2061987353	7.2	59.5	14247	Not Binned
contig18368	2061978665	7.6	61.8	14129	Not Binned
contig01416	2061989699	4.2	58.4	14020	Not Binned
contig04196	2061983589	4.4	60.4	14002	Not Binned
contig18408	2061980470	59.5	60.3	13934	Not Binned
contig00552	2061982822	7	60.9	13907	Not Binned
contig00568	2061983383	7.4	60	13816	Not Binned
contig18380	2061979186	7	60.1	13686	Not Binned
contig18393	2061979747	6.4	62.8	13285	Not Binned
contig16300	2061987364	6.8	55.8	13109	Not Binned
contig00382	2061976126	8.1	60.7	13078	Not Binned
contig00388	2061976286	7.7	62.5	12979	Not Binned
contig18402	2061980189	6	59.8	12897	Not Binned
contig18406	2061980349	6.8	61.9	12705	Not Binned
contig00484	2061980256	6.6	60.5	12456	Not Binned
contig00704	2061988556	4.1	62.7	12293	Not Binned
contig18411	2061980590	6.9	61.4	12251	Not Binned
contig01183	2061983585	4.6	58.4	12157	Not Binned
contig01707	2061979135	8.1	59.7	12129	Not Binned
contig01098	2061980498	6.9	61.4	12043	Not Binned
contig18426	2061981231	102.5	60.9	11911	Not Binned
contig00459	2061979213	7.5	57.4	11850	Not Binned
contig02362	2061976690	4.2	61.7	11756	Not Binned
contig18429	2061981392	5.1	60.4	11745	Not Binned
contig18432	2061981512	28.8	53.8	11627	Not Binned
contig12874	2061982831	4.9	59.3	11504	Not Binned
contig00478	2061980016	8	60.8	11470	Not Binned
contig18444	2061982033	28.9	69.8	11233	Not Binned
contig18445	2061982073	4.4	62.8	11128	Not Binned
contig00551	2061982782	6.7	61.5	11095	Not Binned
contig01548	2061973839	5.3	59.9	11065	Not Binned
contig00326	2061974001	6.7	60.5	11059	Not Binned
contig18499	2061984520	6	62.7	11023	Not Binned
contig13193	2061986200	7.9	63.3	10988	Not Binned
contig18471	2061983236	137.6	69.5	10914	Not Binned
contig18463	2061982875	4.4	59.6	10808	Not Binned
contig10958	2061972287	7.9	61.1	10792	Not Binned
contig00553	2061982862	8	61.8	10752	Not Binned
contig01865	2061983866	4.1	58.2	10707	Not Binned
contig18479	2061983597	60	61.2	10663	Not Binned
contig01135	2061981901	5.2	59	10637	Not Binned
contig10942	2061971959	7.4	61.1	10550	Not Binned
contig01908	2061985431	5.1	61.4	10384	Not Binned
contig00417	2061977489	6.3	55.4	10360	Not Binned
contig18552	2061986845	6.5	54.9	10104	Not Binned
contig10232	2061984714	6.6	61.3	10088	Not Binned
contig01233	2061985470	7.4	64.3	10015	Not Binned
contig18506	2061984800	7.7	58.3	9935	Not Binned
contig18514	2061985161	3.5	65	9831	Not Binned
contig18568	2061987567	5	61.5	9819	Not Binned
contig13854	2061980467	7.3	61.7	9724	Not Binned
contig00860	2061971952	5.3	67.2	9658	Not Binned
contig13015	2061986400	4.2	60.2	9603	Not Binned
contig18524	2061985602	29.5	47.7	9595	Not Binned
contig01454	2061991011	5.3	63.3	9587	Not Binned
contig00607	2061984948	6.7	60.7	9539	Not Binned
contig18539	2061986284	6.1	61.4	9518	Not Binned
contig00550	2061982742	4.7	55.4	9516	Not Binned
contig12643	2061976616	3.5	56.9	9478	Not Binned
contig01494	2061972117	7	67.5	9350	Not Binned
contig18547	2061986604	7.3	57.9	9145	Not Binned
contig18609	2061971432	4.3	59	9130	Not Binned
contig05933	2061978698	4.2	61	9070	Not Binned
contig00610	2061985028	5.1	57	9067	Not Binned
contig01188	2061983785	3.6	61.4	9000	Not Binned
contig01116	2061981139	5.1	62.5	8999	Not Binned
contig00835	2061971132	7.4	62.4	8973	Not Binned
contig00491	2061980577	6.5	61.9	8912	Not Binned
contig18574	2061987807	75.6	55.4	8880	Not Binned
contig18599	2061970940	6.2	69.3	8869	Not Binned
contig18579	2061988048	72.2	53.3	8855	Not Binned
contig18567	2061987486	6.5	64.4	8826	Not Binned
contig11314	2061978379	4.3	62.8	8819	Not Binned
contig18582	2061988168	98.2	58.5	8776	Not Binned
contig01016	2061977610	6.8	62.6	8773	Not Binned
contig01558	2061974290	3.5	52.7	8762	Not Binned
contig03590	2061989005	5.2	72.2	8745	Not Binned
contig00361	2061975313	7.7	55.2	8739	Not Binned
contig00905	2061973633	6.8	58.3	8739	Not Binned
contig01879	2061984347	4	61.2	8718	Not Binned
contig15013	2061972454	6.7	64.5	8705	Not Binned
contig00749	2061979976	8	62	8690	Not Binned
contig18592	2061988609	6.9	60.9	8634	Not Binned
contig18720	2061972006	4.6	60.5	8565	Not Binned
contig18628	2061979989	8.1	60.8	8530	Not Binned
contig18603	2061988850	29	52.5	8513	Not Binned
contig09718	2061980584	6	68.1	8512	Not Binned
contig15492	2061977139	6.8	50.6	8473	Not Binned
contig18563	2061987326	6.6	65	8437	Not Binned
contig01554	2061974085	7.7	66.5	8432	Not Binned
contig18607	2061990654	6.4	49.7	8415	Not Binned
contig13228	2061989379	4.5	60.1	8403	Not Binned
contig08450	2061973885	5.1	58.5	8393	Not Binned
contig18606	2061990203	67.9	72.4	8377	Not Binned
contig15271	2061974996	29.2	51.8	8363	Not Binned
contig18630	2061980871	28.1	73	8355	Not Binned
contig01956	2061986954	3.8	59.9	8320	Not Binned
contig13174	2061980426	5.8	59.3	8270	Not Binned
contig14334	2061986321	7	46.4	8226	Not Binned
contig18631	2061981312	5.1	60.9	8210	Not Binned
contig12951	2061984676	5.5	70.8	8202	Not Binned
contig11864	2061986439	6.2	69.4	8201	Not Binned
contig18610	2061971883	6.8	61.7	8182	Not Binned
contig18920	2061980992	4	67.4	8179	Not Binned
contig18641	2061985763	74.2	60.9	8179	Not Binned
contig00817	2061990477	6.4	49.4	8145	Not Binned
contig10285	2061985115	4.4	61	8144	Not Binned
contig18636	2061983517	146.8	68.3	8142	Not Binned
contig18634	2061982635	65.9	63.9	8132	Not Binned
contig18638	2061984440	68.1	51.1	8128	Not Binned
contig18647	2061988409	7.8	64	8092	Not Binned
contig03919	2061977855	5.3	62.8	8073	Not Binned
contig08010	2061971056	5.2	69.2	8029	Not Binned
contig18699	2061971063	5.1	62.3	8008	Not Binned
contig00433	2061978130	6.7	61.7	8002	Not Binned
contig01379	2061985751	8.1	61.3	7948	Not Binned
contig18664	2061989588	89.3	65.5	7913	Not Binned
contig02110	2061989577	5.1	66.5	7879	Not Binned
contig14501	2061988365	8.1	46.7	7848	Not Binned
contig18629	2061980430	35.1	64.5	7816	Not Binned
contig18650	2061988973	7.5	59.1	7811	Not Binned
contig01943	2061986513	3.7	59.8	7808	Not Binned
contig18672	2061989957	60.5	56.8	7796	Not Binned
contig03185	2061979698	4.1	69.4	7776	Not Binned
contig18754	2061973523	4.5	65.1	7775	Not Binned
contig12815	2061981227	6.4	63.2	7771	Not Binned
contig12651	2061976897	7.7	63.9	7766	Not Binned
contig18700	2061971104	6.5	68.7	7765	Not Binned
contig00383	2061976166	8.5	59.4	7759	Not Binned
contig14181	2061984557	4.4	62	7739	Not Binned
contig18779	2061974671	4.2	58.5	7736	Not Binned
contig18653	2061989096	51.3	71.9	7714	Not Binned
contig18813	2061976220	63.2	59.9	7681	Not Binned
contig00350	2061974944	4.7	66.4	7663	Not Binned
contig02046	2061972774	4.6	62.1	7654	Not Binned
contig10971	2061972656	6.7	67.1	7646	Not Binned
contig00628	2061985629	6	60.3	7623	Not Binned
contig00499	2061980898	6.1	61	7602	Not Binned
contig18707	2061971391	137.4	69	7543	Not Binned
contig18655	2061989178	87.9	61.4	7543	Not Binned
contig18689	2061990736	7.4	64.9	7530	Not Binned
contig01666	2061977972	4.5	60.7	7500	Not Binned
contig13386	2061973191	15.7	50.8	7466	Not Binned
contig18887	2061979467	60.7	59.7	7444	Not Binned
contig00520	2061981659	6.2	60.3	7422	Not Binned
contig01253	2061986232	4.7	61.5	7384	Not Binned
contig18722	2061972088	59.2	55.4	7371	Not Binned
contig00422	2061977689	9.4	67.7	7331	Not Binned
contig18780	2061974712	3.4	62.8	7301	Not Binned
contig18723	2061972129	6.2	63.4	7274	Not Binned
contig03557	2061980862	6.4	56.4	7267	Not Binned
contig00397	2061976687	6.9	54.2	7249	Not Binned
contig13144	2061974134	4.7	65.5	7205	Not Binned
contig02456	2061979737	3.7	62.2	7192	Not Binned
contig13092	2061988364	4.4	65.2	7190	Not Binned
contig19052	2061986846	4.3	67.6	7181	Not Binned
contig12982	2061985518	4.3	57.9	7133	Not Binned
contig14655	2061981309	6.8	62.3	7108	Not Binned
contig15170	2061974258	6.7	62.1	7098	Not Binned
contig14163	2061984195	6.7	68.7	7080	Not Binned
contig07354	2061989745	4.5	71.6	7053	Not Binned
contig18825	2061976741	3.8	64.2	6998	Not Binned
contig01572	2061974782	4.4	60	6968	Not Binned
contig01639	2061977130	4	67.3	6962	Not Binned
contig00140	2061989533	7.8	58.8	6948	Not Binned
contig18832	2061977062	62.7	55.5	6930	Not Binned
contig15816	2061980788	3.6	58.1	6929	Not Binned
contig18749	2061973318	4.1	64.4	6902	Not Binned
contig14831	2061990528	7.3	63.8	6863	Not Binned
contig01294	2061987755	3.4	61.9	6853	Not Binned
contig03869	2061976612	6.6	69.6	6836	Not Binned
contig01607	2061976008	4.7	56.4	6834	Not Binned
contig01659	2061977691	6.5	63.4	6822	Not Binned
contig10841	2061989459	4.4	61.4	6803	Not Binned
contig14677	2061984437	6.9	63.4	6801	Not Binned
contig18738	2061972826	5.1	64.3	6797	Not Binned
contig13465	2061974503	6.8	64.2	6790	Not Binned
contig14704	2061987083	26.5	65.8	6766	Not Binned
contig13367	2061972699	5.6	67.5	6745	Not Binned
contig18793	2061975286	25.9	50.8	6712	Not Binned
contig18938	2061981794	3.5	58.6	6708	Not Binned
contig10785	2061983070	4.1	57	6689	Not Binned
contig00534	2061982261	5.7	69.1	6679	Not Binned
contig14201	2061984757	7.8	62.1	6679	Not Binned
contig01977	2061987556	4.9	63.4	6670	Not Binned
contig00651	2061986431	4.2	58.9	6662	Not Binned
contig01649	2061977411	4	58.4	6639	Not Binned
contig18872	2061978826	4.4	67.3	6637	Not Binned
contig00985	2061976528	4.7	71.4	6636	Not Binned
contig06898	2061985836	3.9	61.3	6627	Not Binned
contig00891	2061973141	4.5	64.8	6617	Not Binned
contig18820	2061976541	3.6	58.9	6612	Not Binned
contig01115	2061981099	6.2	71.2	6593	Not Binned
contig18770	2061974261	5.5	69.2	6590	Not Binned
contig18772	2061974343	100.5	71.9	6580	Not Binned
contig18921	2061981032	4.3	64.3	6567	Not Binned
contig02033	2061989290	4.6	70.2	6518	Not Binned
contig13456	2061974380	8.4	61.9	6511	Not Binned
contig18836	2061977222	95.5	71.1	6509	Not Binned
contig03977	2061979178	4.9	54.3	6499	Not Binned
contig02497	2061981101	3.7	63.6	6494	Not Binned
contig15537	2061977941	5.4	66.2	6491	Not Binned
contig10844	2061989500	5.2	57.3	6479	Not Binned
contig10763	2061978178	5.3	62.5	6478	Not Binned
contig18993	2061984199	4.1	62.2	6478	Not Binned
contig18855	2061978064	53.6	61.7	6478	Not Binned
contig00606	2061984908	7.9	43.4	6475	Not Binned
contig12910	2061983713	4	61	6471	Not Binned
contig18862	2061978385	77.3	57.7	6467	Not Binned
contig10927	2061971508	7.5	64.3	6465	Not Binned
contig11053	2061974255	4	70.4	6459	Not Binned
contig00875	2061972526	6.9	67.9	6456	Not Binned
contig01456	2061991052	3.3	64.7	6455	Not Binned
contig18847	2061977703	66.8	40.6	6443	Not Binned
contig00674	2061987433	5.2	69.2	6434	Not Binned
contig00285	2061972648	7.5	69.8	6433	Not Binned
contig00765	2061985750	5.2	70.6	6405	Not Binned
contig00789	2061989534	4.1	56.9	6403	Not Binned
contig00581	2061983824	6.1	56.6	6395	Not Binned
contig19075	2061987848	3.1	62	6385	Not Binned
contig04228	2061984030	3.5	66.7	6379	Not Binned
contig00665	2061987032	4.5	63.9	6374	Not Binned
contig03238	2061981343	6.9	62.5	6370	Not Binned
contig00630	2061985709	7.6	60.3	6364	Not Binned
contig15711	2061979665	8	64.3	6352	Not Binned
contig14883	2061991020	3.6	62.5	6345	Not Binned
contig06857	2061985595	4.2	74.4	6343	Not Binned
contig00756	2061982622	6.6	60.8	6328	Not Binned
contig18837	2061977262	6.2	62.8	6327	Not Binned
contig18843	2061977543	6	59.1	6327	Not Binned
contig02068	2061980419	3.9	63.1	6325	Not Binned
contig19001	2061984601	4.1	64	6306	Not Binned
contig14980	2061972044	4.1	62.3	6303	Not Binned
contig10917	2061971303	4.3	64.1	6301	Not Binned
contig19175	2061990081	5.3	66	6300	Not Binned
contig01107	2061980899	5.3	63	6300	Not Binned
contig02409	2061978214	5	68.8	6289	Not Binned
contig04966	2061989785	5.4	71.9	6285	Not Binned
contig18861	2061978345	26.7	65.8	6277	Not Binned
contig13242	2061989789	7	61.1	6273	Not Binned
contig18953	2061982435	4.8	53.5	6273	Not Binned
contig01711	2061979295	7.7	70	6270	Not Binned
contig01248	2061986031	5.5	68.9	6263	Not Binned
contig00818	2061990518	6.7	60.6	6254	Not Binned
contig18882	2061979267	57	56.7	6238	Not Binned
contig00997	2061976929	8.4	62.6	6234	Not Binned
contig01710	2061979255	4.3	62.2	6233	Not Binned
contig00436	2061978291	6.8	51.7	6196	Not Binned
contig19080	2061988089	4.9	61.6	6195	Not Binned
contig19257	2061973647	4.8	68	6179	Not Binned
contig08404	2061973516	4.1	60.6	6178	Not Binned
contig00493	2061980657	5.4	63	6176	Not Binned
contig01045	2061978733	5.1	69.7	6163	Not Binned
contig02149	2061990889	6	71.4	6152	Not Binned
contig00527	2061981940	4.8	61	6151	Not Binned
contig02728	2061988318	3.7	65.4	6151	Not Binned
contig11138	2061975403	4.5	61.4	6133	Not Binned
contig18871	2061978786	6.4	61	6130	Not Binned
contig12001	2061988684	3.8	63.4	6130	Not Binned
contig18891	2061979668	65.5	59	6126	Not Binned
contig18883	2061979307	5.7	69	6105	Not Binned
contig01342	2061973675	4.8	60.7	6105	Not Binned
contig04347	2061985514	6.3	59.9	6098	Not Binned
contig03300	2061983147	5.1	69.4	6089	Not Binned
contig13872	2061980707	8.1	59.9	6089	Not Binned
contig02316	2061975357	4.4	69.1	6088	Not Binned
contig14133	2061983674	4.7	68.2	6087	Not Binned
contig13095	2061988485	6.4	72.2	6084	Not Binned
contig18986	2061983878	2.8	62.9	6073	Not Binned
contig18895	2061979828	82	67.2	6063	Not Binned
contig18930	2061981433	49.4	62.1	6063	Not Binned
contig10829	2061989213	4.1	52.6	6033	Not Binned
contig19311	2061976141	3.5	62.6	6029	Not Binned
contig18894	2061979788	88	58.5	6025	Not Binned
contig09854	2061981386	6.1	63.3	6018	Not Binned
contig00496	2061980777	8.6	61.4	6012	Not Binned
contig02039	2061990192	4.9	60.2	6006	Not Binned
contig13106	2061988725	4.3	70.6	6000	Not Binned
contig18885	2061979387	6.7	60.7	5998	Not Binned
contig00952	2061975314	6.8	66	5995	Not Binned
contig01549	2061973880	4.2	61.6	5995	Not Binned
contig10584	2061987721	4.4	69.8	5994	Not Binned
contig16323	2061987645	4.8	68.8	5989	Not Binned
contig03065	2061975929	4.6	64.3	5989	Not Binned
contig11075	2061974501	7.9	62.3	5981	Not Binned
contig13934	2061981549	5	68.7	5975	Not Binned
contig18933	2061981553	3.8	68.6	5975	Not Binned
contig00557	2061983022	5.3	64.3	5973	Not Binned
contig13467	2061974544	7.5	61.3	5946	Not Binned
contig00719	2061989288	5.4	73.1	5937	Not Binned
contig03932	2061978256	4.6	72.8	5930	Not Binned
contig00488	2061980457	6.7	63.1	5929	Not Binned
contig13260	2061990363	3.4	61.3	5925	Not Binned
contig19017	2061985282	3.6	62.9	5917	Not Binned
contig10790	2061983952	5.1	70.2	5908	Not Binned
contig01760	2061980779	6.3	62	5900	Not Binned
contig15649	2061978983	5.2	63.8	5900	Not Binned
contig01489	2061971994	4.4	58.7	5889	Not Binned
contig13038	2061987041	4	69.2	5887	Not Binned
contig01578	2061975069	3.6	61.6	5880	Not Binned
contig03150	2061978656	3.7	67.6	5879	Not Binned
contig18869	2061978706	5.5	62.9	5865	Not Binned
contig10938	2061971754	6.5	69.4	5863	Not Binned
contig13104	2061988645	3.5	63.3	5857	Not Binned
contig02042	2061970970	5.1	70.4	5849	Not Binned
contig09633	2061980263	3.4	64.1	5837	Not Binned
contig19160	2061989425	3.7	62.6	5835	Not Binned
contig13234	2061989543	5.4	59.3	5826	Not Binned
contig01213	2061984788	6.8	61.9	5822	Not Binned
contig03651	2061990850	5.4	61.1	5796	Not Binned
contig06402	2061981786	4.2	64	5775	Not Binned
contig18954	2061982475	7.6	62.1	5774	Not Binned
contig18962	2061982836	103.6	64.3	5768	Not Binned
contig01201	2061984306	7	71	5761	Not Binned
contig03670	2061971054	4.6	61.5	5755	Not Binned
contig19024	2061985603	10	61.2	5743	Not Binned
contig18907	2061980390	4.7	64.7	5715	Not Binned
contig00445	2061978652	6.3	65.6	5713	Not Binned
contig13804	2061979664	4.7	64.7	5706	Not Binned
contig17516	2061982393	5.9	56.6	5705	Not Binned
contig14521	2061988566	6.8	64.3	5703	Not Binned
contig18934	2061981593	4.4	63.6	5701	Not Binned
contig15887	2061981590	5.9	62.8	5676	Not Binned
contig11696	2061984033	4.2	63.4	5665	Not Binned
contig18987	2061983918	79.9	70.6	5647	Not Binned
contig01280	2061987194	5.2	70.5	5645	Not Binned
contig02543	2061982424	3.8	61.1	5616	Not Binned
contig13991	2061982110	6.9	55.3	5616	Not Binned
contig02181	2061971626	5.6	71.7	5604	Not Binned
contig18978	2061983558	75.6	71.2	5595	Not Binned
contig10878	2061990484	4.3	57.4	5593	Not Binned
contig18911	2061980591	5.8	63.1	5592	Not Binned
contig19104	2061989302	3.6	57.1	5592	Not Binned
contig16734	2061990939	81.3	69.9	5584	Not Binned
contig18995	2061984279	120.8	70.7	5579	Not Binned
contig10379	2061985877	4.3	62.6	5559	Not Binned
contig18976	2061983437	89.1	68.2	5556	Not Binned
contig01701	2061978854	6.1	59.5	5551	Not Binned
contig14410	2061987443	4.5	62.5	5541	Not Binned
contig01712	2061979335	5.1	61.9	5533	Not Binned
contig18959	2061982716	4.2	61.5	5532	Not Binned
contig00634	2061985870	4.3	64.6	5527	Not Binned
contig01422	2061989904	4.9	62.6	5526	Not Binned
contig11633	2061983271	3.6	69.2	5521	Not Binned
contig15928	2061982151	4.1	64.6	5512	Not Binned
contig04775	2061978617	5.8	70.8	5507	Not Binned
contig19102	2061984400	3.6	63	5506	Not Binned
contig14107	2061983393	4.1	57.8	5504	Not Binned
contig19249	2061973319	106.8	51.3	5501	Not Binned
contig10186	2061984192	4.3	63.5	5496	Not Binned
contig12896	2061983352	3.4	47.3	5486	Not Binned
contig18979	2061983598	75.5	59.4	5481	Not Binned
contig00390	2061976366	4.7	63	5476	Not Binned
contig18970	2061983197	125.3	69.5	5468	Not Binned
contig19112	2061972786	4.2	56.8	5466	Not Binned
contig01641	2061977210	5.1	57.1	5465	Not Binned
contig18956	2061982555	3.4	64.2	5460	Not Binned
contig14711	2061987965	4.8	62	5451	Not Binned
contig01761	2061980819	6.5	61.5	5445	Not Binned
contig11180	2061976294	3.4	62.7	5444	Not Binned
contig19167	2061989712	3.9	69	5441	Not Binned
contig13036	2061987001	3.3	64.2	5436	Not Binned
contig01721	2061979736	5	59.7	5429	Not Binned
contig02483	2061980620	4.8	62.4	5428	Not Binned
contig19010	2061985002	75.9	68.8	5425	Not Binned
contig03440	2061987317	4.2	73.9	5419	Not Binned
contig19184	2061990491	3.9	61.8	5419	Not Binned
contig13050	2061987242	5.6	67.2	5417	Not Binned
contig11478	2061980946	4.3	61.2	5413	Not Binned
contig18918	2061980912	5.4	70.1	5410	Not Binned
contig18963	2061982876	4	62.9	5402	Not Binned
contig19168	2061989794	4.1	57.7	5401	Not Binned
contig19018	2061985363	25.3	64.3	5397	Not Binned
contig04219	2061983789	3.4	70.1	5392	Not Binned
contig13527	2061975651	6	69.3	5388	Not Binned
contig06784	2061984954	5	72.5	5379	Not Binned
contig05005	2061990154	5.9	73.2	5375	Not Binned
contig01228	2061985350	4.8	69	5365	Not Binned
contig11036	2061973968	3.5	72.1	5362	Not Binned
contig02571	2061983426	3.7	68.3	5361	Not Binned
contig00442	2061978531	6.5	61.4	5348	Not Binned
contig18968	2061983117	3.3	70.5	5343	Not Binned
contig19078	2061988009	6.1	68.6	5343	Not Binned
contig04083	2061981544	5.1	59.9	5335	Not Binned
contig19034	2061986044	5.6	69.1	5331	Not Binned
contig01126	2061981540	5	69.6	5323	Not Binned
contig01653	2061977531	4.8	70.1	5321	Not Binned
contig05538	2061975442	3.6	69.3	5318	Not Binned
contig01225	2061985229	4.6	63.9	5315	Not Binned
contig01445	2061990683	3.7	69.7	5314	Not Binned
contig00355	2061975108	6	59.5	5309	Not Binned
contig12723	2061978901	5.4	62.9	5305	Not Binned
contig02694	2061987196	3.4	68.2	5304	Not Binned
contig19031	2061985924	6.1	59.8	5300	Not Binned
contig19172	2061989958	3	62.9	5286	Not Binned
contig01640	2061977170	3.4	63.7	5269	Not Binned
contig19154	2061989138	4.2	69.1	5261	Not Binned
contig19040	2061986325	33.3	71.1	5260	Not Binned
contig00343	2061974698	3.3	67.6	5259	Not Binned
contig19120	2061976421	3.1	59.6	5253	Not Binned
contig19019	2061985403	5.4	61.6	5251	Not Binned
contig02744	2061988679	6.7	68.3	5241	Not Binned
contig00937	2061974781	6.5	71	5226	Not Binned
contig19029	2061985844	5.8	61.3	5214	Not Binned
contig02087	2061987957	4.4	64.3	5195	Not Binned
contig00529	2061982020	6	68.2	5191	Not Binned
contig03046	2061975317	7.6	73.8	5188	Not Binned
contig01743	2061980298	2.7	61.1	5180	Not Binned
contig14576	2061970978	4.8	63.1	5175	Not Binned
contig01381	2061986633	5.2	62.8	5156	Not Binned
contig01297	2061987835	6.2	61.4	5152	Not Binned
contig19068	2061987568	4.8	59.6	5151	Not Binned
contig01373	2061983946	4.3	59.6	5150	Not Binned
contig19035	2061986084	7.1	59.8	5122	Not Binned
contig19270	2061974262	4.4	58.8	5116	Not Binned
contig01510	2061972732	7.1	68.7	5113	Not Binned
contig14152	2061984075	5.3	59.3	5110	Not Binned
contig01542	2061973593	8	64	5097	Not Binned
contig02134	2061990315	4.3	57.8	5090	Not Binned
contig11037	2061974009	4.3	59.2	5082	Not Binned
contig03904	2061977454	4.3	72.2	5080	Not Binned
contig12921	2061983873	6.9	51.3	5076	Not Binned
contig01095	2061980377	5.8	62.4	5071	Not Binned
contig01896	2061985030	3.7	62.4	5070	Not Binned
contig00857	2061971829	4.3	64	5044	Not Binned
contig19362	2061978386	4.3	63.7	5040	Not Binned
contig01357	2061979054	4.9	61.7	5035	Not Binned
contig13565	2061976376	4.1	62.8	5034	Not Binned
contig02861	2061989619	4.4	72.2	5031	Not Binned
contig19054	2061986926	5.1	61.8	5024	Not Binned
contig02294	2061974783	3.8	71	5019	Not Binned
contig01754	2061980619	4.4	63.6	5005	Not Binned
contig19147	2061988410	95.3	71	4994	Not Binned
contig03326	2061984029	4.3	72.4	4992	Not Binned
contig02232	2061973266	3.9	71.5	4991	Not Binned
contig19041	2061986365	4.2	57	4989	Not Binned
contig19423	2061981113	3.7	65.8	4989	Not Binned
contig03721	2061972448	6.7	71.2	4982	Not Binned
contig01138	2061981981	4.8	57.7	4964	Not Binned
contig13666	2061977940	4.8	62	4961	Not Binned
contig01442	2061990519	4.3	70	4953	Not Binned
contig01259	2061986432	6.5	63.5	4949	Not Binned
contig02105	2061989372	4.2	69.4	4939	Not Binned
contig19155	2061989179	82.9	69.8	4922	Not Binned
contig19051	2061986806	34	66.4	4914	Not Binned
contig02286	2061974496	2.4	69.1	4910	Not Binned
contig01054	2061978973	5.3	67.8	4901	Not Binned
contig00526	2061981900	5.6	69.2	4870	Not Binned
contig00980	2061976327	5.7	63.9	4869	Not Binned
contig11207	2061976655	4.4	65.3	4867	Not Binned
contig02801	2061980861	3.8	56.5	4866	Not Binned
contig01281	2061987234	4.1	61.8	4859	Not Binned
contig19161	2061989466	75.9	71.6	4853	Not Binned
contig02802	2061981302	3.5	68.8	4851	Not Binned
contig03508	2061990194	4.8	66	4839	Not Binned
contig10752	2061975526	3.1	62.2	4830	Not Binned
contig19558	2061987128	4.1	60.4	4821	Not Binned
contig19357	2061978145	3.9	61.1	4808	Not Binned
contig04497	2061987358	3.7	63.7	4805	Not Binned
contig19188	2061990696	71.7	62.8	4803	Not Binned
contig19543	2061986446	3	53.9	4798	Not Binned
contig19157	2061989261	80.2	70.7	4795	Not Binned
contig00658	2061986752	3.9	61.9	4782	Not Binned
contig01815	2061982583	5.1	57.2	4782	Not Binned
contig13273	2061990609	4.1	69	4777	Not Binned
contig01129	2061981620	4.2	58	4777	Not Binned
contig09419	2061979420	5.2	70.8	4775	Not Binned
contig19404	2061980271	3.8	62.4	4774	Not Binned
contig19308	2061976021	5.3	70	4773	Not Binned
contig19097	2061988810	67.1	73.4	4772	Not Binned
contig01832	2061982984	3.4	59.7	4772	Not Binned
contig19211	2061971597	59.3	69.6	4768	Not Binned
contig19197	2061991065	86.1	70.7	4752	Not Binned
contig12787	2061980546	5.6	70	4750	Not Binned
contig19279	2061974672	4.6	61.3	4749	Not Binned
contig16174	2061985720	4.3	66.8	4748	Not Binned
contig00490	2061980537	7.5	63.2	4746	Not Binned
contig19203	2061971228	61.4	51.8	4743	Not Binned
contig10413	2061986117	3.7	64.2	4738	Not Binned
contig01521	2061973060	5.1	67.9	4730	Not Binned
contig19304	2061975820	3	62.4	4730	Not Binned
contig11402	2061979702	5.4	67.1	4726	Not Binned
contig00608	2061984988	5.1	63.5	4726	Not Binned
contig13398	2061973519	5.1	61.6	4724	Not Binned
contig19096	2061988770	98.6	56.8	4715	Not Binned
contig01034	2061978372	4.6	55.6	4713	Not Binned
contig19117	2061975041	7.5	55.5	4710	Not Binned
contig19119	2061975980	4.3	65.3	4709	Not Binned
contig19187	2061990614	91.7	66.8	4706	Not Binned
contig01304	2061988116	3.1	57.4	4699	Not Binned
contig03424	2061986836	4.5	69.5	4697	Not Binned
contig06788	2061984994	4.4	64.4	4697	Not Binned
contig01078	2061979735	3.5	62.2	4694	Not Binned
contig00635	2061985910	6.2	55.6	4692	Not Binned
contig19089	2061988490	34.1	63.2	4690	Not Binned
contig05009	2061990236	5.4	56.7	4689	Not Binned
contig15718	2061979705	6.6	60.5	4686	Not Binned
contig01252	2061986151	4.4	62.6	4685	Not Binned
contig19216	2061971802	35.6	50.7	4678	Not Binned
contig02382	2061977452	4.2	63.4	4661	Not Binned
contig19361	2061978346	19.9	63.1	4646	Not Binned
contig00754	2061981740	5.6	66.6	4640	Not Binned
contig13376	2061973027	3.7	61.2	4637	Not Binned
contig01143	2061982222	3.7	59	4620	Not Binned
contig01290	2061987595	4.1	58.2	4614	Not Binned
contig03241	2061981423	5	71	4605	Not Binned
contig00595	2061984467	6.8	69.2	4602	Not Binned
contig02691	2061987035	4.5	63.7	4595	Not Binned
contig00884	2061972936	4.3	61.9	4590	Not Binned
contig02146	2061990766	4.9	65.6	4582	Not Binned
contig14498	2061988325	3.6	63.3	4582	Not Binned
contig00605	2061984827	6.9	61.2	4569	Not Binned
contig02111	2061989618	3.9	65	4569	Not Binned
contig14148	2061983995	4.3	73	4565	Not Binned
contig00755	2061982181	56.5	61	4559	Not Binned
contig08310	2061973024	4.6	73.8	4558	Not Binned
contig02060	2061977732	5.8	62.3	4553	Not Binned
contig13166	2061979503	5	69.4	4550	Not Binned
contig01604	2061975847	5.4	62.1	4543	Not Binned
contig06907	2061985916	7.2	67.5	4541	Not Binned
contig13916	2061981429	6.8	69.3	4526	Not Binned
contig19195	2061990983	5.6	62.9	4526	Not Binned
contig03900	2061977374	3.9	67.9	4524	Not Binned
contig00632	2061985830	5.7	67.8	4523	Not Binned
contig14164	2061984235	4	57.1	4522	Not Binned
contig10679	2061988643	4.1	64.1	4521	Not Binned
contig13137	2061972781	4.5	69.2	4518	Not Binned
contig03567	2061983508	6.7	70.8	4517	Not Binned
contig13199	2061988405	4.6	61.6	4516	Not Binned
contig00699	2061988315	5.4	64.3	4513	Not Binned
contig19275	2061974467	74.7	66.9	4508	Not Binned
contig02132	2061990233	3.1	57	4507	Not Binned
contig01723	2061979776	3.4	63.4	4501	Not Binned
contig19676	2061990123	5	68	4500	Not Binned
contig19775	2061974468	4.1	70.3	4500	Not Binned
contig19966	2061982998	4.4	58.8	4500	Not Binned
contig19509	2061984963	4.1	62.3	4500	Not Binned
contig14134	2061983714	4.1	59.2	4499	Not Binned
contig19766	2061974058	3	60.8	4497	Not Binned
contig01756	2061980699	3.1	69.7	4491	Not Binned
contig12757	2061979783	4.5	67.6	4490	Not Binned
contig01465	2061971133	4.1	65.2	4487	Not Binned
contig13031	2061986841	3.1	66.2	4485	Not Binned
contig11149	2061975649	3.8	55	4485	Not Binned
contig01828	2061982944	3.4	57.6	4483	Not Binned
contig08157	2061971958	5.9	69.8	4478	Not Binned
contig10997	2061973148	4.5	69.4	4474	Not Binned
contig12770	2061980065	4.3	70	4467	Not Binned
contig19557	2061987047	5	68.9	4463	Not Binned
contig00277	2061972443	6.8	57.2	4461	Not Binned
contig12623	2061975934	3.9	71.1	4460	Not Binned
contig01774	2061981341	4.3	64.9	4458	Not Binned
contig17148	2061976579	10.7	68.7	4456	Not Binned
contig08236	2061972655	4.4	68.7	4455	Not Binned
contig02993	2061973554	3.6	73	4445	Not Binned
contig00437	2061978331	5.8	59.5	4442	Not Binned
contig01299	2061987915	2.9	64	4439	Not Binned
contig13387	2061973273	5.3	72.5	4430	Not Binned
contig13822	2061979904	6.6	61.1	4428	Not Binned
contig19177	2061990163	4.8	64.4	4424	Not Binned
contig19692	2061990861	31.9	60.8	4423	Not Binned
contig13032	2061986881	4.4	71.2	4414	Not Binned
contig09214	2061978298	4.6	62.1	4412	Not Binned
contig01627	2061976649	8.6	61.3	4410	Not Binned
contig01714	2061979415	5.6	64.5	4394	Not Binned
contig19194	2061990942	9.5	69.2	4393	Not Binned
contig15238	2061974750	3.7	57.5	4392	Not Binned
contig19190	2061990778	6.9	44.2	4390	Not Binned
contig19268	2061974180	5.1	63.9	4387	Not Binned
contig19303	2061975779	72	59	4375	Not Binned
contig07376	2061971876	4.8	68.7	4372	Not Binned
contig02920	2061971217	4.7	71.4	4369	Not Binned
contig19109	2061971433	6.4	70	4366	Not Binned
contig04162	2061982867	3.8	74.1	4365	Not Binned
contig01567	2061974536	2.9	64	4363	Not Binned
contig12984	2061985598	4	61.7	4363	Not Binned
contig00410	2061977168	7.3	66.4	4360	Not Binned
contig12825	2061981468	4.3	60.5	4359	Not Binned
contig02623	2061985111	5.9	71.4	4358	Not Binned
contig11548	2061981948	3.5	62.5	4356	Not Binned
contig19327	2061976822	184.5	65.1	4346	Not Binned
contig19448	2061982236	3.4	62.8	4344	Not Binned
contig19715	2061971762	4.1	58.6	4343	Not Binned
contig03289	2061982746	2.7	70.3	4341	Not Binned
contig08251	2061972819	4.4	63.2	4341	Not Binned
contig02482	2061980580	3	60.2	4334	Not Binned
contig00918	2061974166	4	69	4333	Not Binned
contig00629	2061985669	4.4	67.9	4330	Not Binned
contig00850	2061971583	4.9	60.7	4326	Not Binned
contig05174	2061971465	3.8	69.2	4317	Not Binned
contig07219	2061988041	4.2	66.6	4314	Not Binned
contig17707	2061985561	39	56.5	4307	Not Binned
contig00190	2061990681	7.4	61.5	4303	Not Binned
contig16127	2061985039	65.7	59.4	4301	Not Binned
contig01848	2061983465	5.1	64.1	4301	Not Binned
contig01513	2061972855	3.9	67.7	4295	Not Binned
contig00994	2061976768	4.5	68.3	4293	Not Binned
contig06078	2061979860	3.7	67.6	4288	Not Binned
contig01384	2061987956	4.6	62.3	4287	Not Binned
contig06028	2061979419	6.1	67	4281	Not Binned
contig19294	2061975328	86.2	59.1	4280	Not Binned
contig19479	2061983599	4.2	60.8	4280	Not Binned
contig03269	2061982064	3.9	68.7	4274	Not Binned
contig02518	2061981863	4	68.1	4267	Not Binned
contig01365	2061982182	3.6	69.5	4259	Not Binned
contig11501	2061981387	3.9	64.8	4256	Not Binned
contig01320	2061988637	4.2	58.6	4253	Not Binned
contig01171	2061983184	4.7	64.3	4252	Not Binned
contig01886	2061984629	5.6	70.1	4246	Not Binned
contig01187	2061983745	4.9	61	4246	Not Binned
contig14641	2061980868	5	69.6	4243	Not Binned
contig04137	2061982586	6.8	54.9	4239	Not Binned
contig12484	2061973477	6.3	52.9	4239	Not Binned
contig19397	2061979909	83.9	68.9	4229	Not Binned
contig16257	2061986843	5.4	69.4	4229	Not Binned
contig19410	2061980552	4.8	59.8	4228	Not Binned
contig13256	2061990240	5.6	67.8	4227	Not Binned
contig19385	2061979388	100.6	63.6	4226	Not Binned
contig12710	2061978460	3.5	70.5	4222	Not Binned
contig13392	2061973396	3.2	68.9	4216	Not Binned
contig12949	2061984596	3.9	68.7	4214	Not Binned
contig10306	2061985235	5.3	69.9	4212	Not Binned
contig14960	2061971921	3.1	62.5	4203	Not Binned
contig13876	2061980827	5.9	66.5	4199	Not Binned
contig01556	2061974208	6.3	64.6	4199	Not Binned
contig10989	2061972984	3.8	64.7	4198	Not Binned
contig01028	2061978091	4.5	59.2	4196	Not Binned
contig03301	2061983187	4	69.3	4194	Not Binned
contig02073	2061982624	7.2	70.6	4188	Not Binned
contig19368	2061978667	11.9	69.3	4183	Not Binned
contig02383	2061977492	4.3	63.8	4178	Not Binned
contig03183	2061979618	4.8	69.9	4177	Not Binned
contig07623	2061989130	3.8	69	4174	Not Binned
contig19298	2061975574	84.5	72	4171	Not Binned
contig19378	2061979108	39.1	63.7	4168	Not Binned
contig02112	2061989659	3.2	62.2	4168	Not Binned
contig13819	2061979864	3.4	67.4	4167	Not Binned
contig19407	2061980391	105.4	70.3	4165	Not Binned
contig01698	2061978774	7.1	62.3	4162	Not Binned
contig02926	2061971463	5	70.3	4155	Not Binned
contig11534	2061981788	5	69.9	4152	Not Binned
contig08259	2061972860	4	70.5	4145	Not Binned
contig19318	2061976462	6.7	68.3	4142	Not Binned
contig19281	2061974754	4.2	52.8	4138	Not Binned
contig19807	2061975941	2.4	59.2	4137	Not Binned
contig19392	2061979709	34.9	70	4131	Not Binned
contig01172	2061983224	4.7	62.3	4131	Not Binned
contig06691	2061984191	4.3	62	4128	Not Binned
contig10076	2061982909	4.8	62.8	4124	Not Binned
contig05326	2061973474	5.3	69.6	4122	Not Binned
contig19280	2061974713	5.4	59.1	4122	Not Binned
contig00060	2061980416	5.5	70.1	4121	Not Binned
contig00814	2061990354	5.4	69.6	4109	Not Binned
contig10153	2061983711	4	67.3	4107	Not Binned
contig19386	2061979428	28.1	51.9	4106	Not Binned
contig19387	2061979468	70.2	67.2	4104	Not Binned
contig02742	2061988639	4.9	70	4100	Not Binned
contig03022	2061974661	2.8	60.5	4096	Not Binned
contig00815	2061990395	7.3	61.3	4091	Not Binned
contig01333	2061990191	5.2	70.6	4089	Not Binned
contig19374	2061978907	76.5	65.2	4088	Not Binned
contig02109	2061989536	4.5	68.7	4086	Not Binned
contig02897	2061990767	4	71.8	4083	Not Binned
contig01568	2061974618	3.5	63.4	4073	Not Binned
contig03258	2061981904	3.4	70.8	4071	Not Binned
contig02201	2061972200	3.5	68.1	4065	Not Binned
contig00500	2061980938	4.6	67.2	4063	Not Binned
contig07199	2061987840	4.8	66.2	4050	Not Binned
contig13806	2061979704	2.8	65.4	4045	Not Binned
contig19415	2061980752	60.4	72.6	4044	Not Binned
contig01075	2061979615	3.2	69.2	4043	Not Binned
contig01577	2061974987	4.5	69.3	4042	Not Binned
contig19354	2061978025	6.2	65.4	4031	Not Binned
contig01656	2061977611	4.4	59.3	4029	Not Binned
contig04176	2061983148	5	71.8	4027	Not Binned
contig19889	2061979590	3.8	62.8	4020	Not Binned
contig12746	2061979543	4.4	68.3	4017	Not Binned
contig19511	2061985043	3.1	61.5	4014	Not Binned
contig15134	2061973971	5.2	62.2	4012	Not Binned
contig19306	2061975900	3.4	66.7	4006	Not Binned
contig06458	2061982347	5.2	60.9	4006	Not Binned
contig02664	2061986274	4.5	65.7	4005	Not Binned
contig19365	2061978506	3.5	64.6	4003	Not Binned
contig01703	2061978934	3.4	65.3	4001	Not Binned
contig01015	2061977570	4.7	64.2	3997	Not Binned
contig19285	2061974918	52.4	70.8	3990	Not Binned
contig00806	2061990067	6.1	67.9	3989	Not Binned
contig19293	2061975287	5.1	65.6	3987	Not Binned
contig12698	2061978220	2.7	63.4	3985	Not Binned
contig00492	2061980617	7	61.7	3984	Not Binned
contig19353	2061977985	14.7	41.5	3982	Not Binned
contig01717	2061979576	4.2	62.6	3978	Not Binned
contig12749	2061979623	3.6	63.3	3975	Not Binned
contig14422	2061987644	5.3	62.4	3971	Not Binned
contig15850	2061981149	3.4	56.7	3969	Not Binned
contig19328	2061976903	4.8	64.1	3969	Not Binned
contig19645	2061987529	3.5	69.4	3962	Not Binned
contig14376	2061987163	4.2	58.2	3961	Not Binned
contig19430	2061981434	40	59.6	3957	Not Binned
contig19458	2061982677	68.7	73	3955	Not Binned
contig12677	2061977538	3.1	59.5	3954	Not Binned
contig10851	2061989705	3.7	67.3	3953	Not Binned
contig10283	2061985075	4.8	67.5	3951	Not Binned
contig02984	2061973308	4.6	71.5	3946	Not Binned
contig03481	2061988480	4.9	71.8	3942	Not Binned
contig13634	2061977419	3.5	62.8	3938	Not Binned
contig08279	2061972942	4.3	73.6	3931	Not Binned
contig06791	2061985114	4.6	72.6	3925	Not Binned
contig08585	2061974746	4.3	68.4	3924	Not Binned
contig02990	2061973431	4.8	68.7	3923	Not Binned
contig19344	2061977584	3.3	59.6	3923	Not Binned
contig03929	2061978095	3.6	70.5	3917	Not Binned
contig13120	2061979944	3.3	70.4	3915	Not Binned
contig11334	2061978740	4.3	61.3	3913	Not Binned
contig19476	2061983438	32.3	71.3	3912	Not Binned
contig19469	2061983158	102.2	70.9	3909	Not Binned
contig08917	2061976774	3.4	61.9	3909	Not Binned
contig01021	2061977851	5.1	59.7	3906	Not Binned
contig17535	2061982754	5.1	58.3	3906	Not Binned
contig01408	2061989412	4.6	64.9	3902	Not Binned
contig13372	2061972945	4.7	73.4	3900	Not Binned
contig15891	2061981670	3.9	63	3887	Not Binned
contig19895	2061979830	4	61.6	3885	Not Binned
contig14771	2061989667	2.7	52.8	3880	Not Binned
contig17060	2061975366	14	71.5	3878	Not Binned
contig17232	2061977902	10.6	66.7	3876	Not Binned
contig01877	2061984267	4	69.4	3874	Not Binned
contig11954	2061987882	2.7	60.1	3873	Not Binned
contig00113	2061989000	37	74.2	3872	Not Binned
contig19532	2061985965	73.6	70.5	3869	Not Binned
contig13068	2061987643	3.5	61.2	3869	Not Binned
contig01447	2061990765	3.7	66.4	3868	Not Binned
contig00916	2061974043	4.9	68.8	3867	Not Binned
contig14909	2061971347	5.7	62.8	3867	Not Binned
contig02343	2061976129	4	69.9	3865	Not Binned
contig19759	2061973771	3.5	63.9	3859	Not Binned
contig01651	2061977451	3.9	62.3	3857	Not Binned
contig12597	2061975363	4.3	66.7	3856	Not Binned
contig04630	2061988641	5.2	72.5	3850	Not Binned
contig19814	2061976262	4	69.2	3850	Not Binned
contig01870	2061984067	4	63.4	3850	Not Binned
contig01475	2061971461	3.5	62.2	3849	Not Binned
contig19377	2061979027	84.4	72.5	3847	Not Binned
contig19326	2061976782	6.8	58.1	3846	Not Binned
contig19301	2061975697	5	69.7	3844	Not Binned
contig00781	2061989206	5.7	61.2	3842	Not Binned
contig19756	2061973607	2.5	63.5	3841	Not Binned
contig10762	2061977737	96.5	69	3840	Not Binned
contig01195	2061984106	8.5	67.6	3839	Not Binned
contig04131	2061982426	5.4	65.3	3839	Not Binned
contig19438	2061981795	117.1	72	3836	Not Binned
contig01369	2061983505	3.6	64.3	3836	Not Binned
contig19432	2061981514	76.2	72.5	3834	Not Binned
contig13497	2061975159	6.8	65.7	3833	Not Binned
contig15575	2061978222	5.5	64.4	3833	Not Binned
contig15769	2061980307	3.8	60.5	3830	Not Binned
contig13693	2061978301	4.8	61.7	3826	Not Binned
contig19288	2061975082	5.2	67	3825	Not Binned
contig19494	2061984240	102.3	70.1	3821	Not Binned
contig17398	2061980589	82.2	71.1	3820	Not Binned
contig19791	2061975206	3.9	62.6	3819	Not Binned
contig05596	2061976172	6.1	72.2	3818	Not Binned
contig19444	2061982035	3.1	70.8	3817	Not Binned
contig02305	2061975111	3.9	71.1	3817	Not Binned
contig04293	2061984712	6.1	70.2	3813	Not Binned
contig01822	2061982784	6.4	67.7	3812	Not Binned
contig02506	2061981502	6.4	66.7	3812	Not Binned
contig00816	2061990436	5.9	61	3812	Not Binned
contig19672	2061989959	88.8	67.4	3810	Not Binned
contig14118	2061983634	4.5	72.5	3808	Not Binned
contig12810	2061981107	3.9	67.8	3806	Not Binned
contig01288	2061987474	7.1	70.4	3805	Not Binned
contig01635	2061977010	4	61.1	3801	Not Binned
contig19491	2061984120	117.3	69.1	3799	Not Binned
contig03240	2061981383	3.6	70.5	3798	Not Binned
contig11544	2061981908	8.9	68.4	3792	Not Binned
contig19427	2061981273	3.1	60	3781	Not Binned
contig19480	2061983639	43.7	60	3779	Not Binned
contig00953	2061975355	6.2	61.3	3779	Not Binned
contig01766	2061981060	4.8	67.5	3775	Not Binned
contig15313	2061975406	4.8	55.1	3773	Not Binned
contig00340	2061974616	4.7	71	3771	Not Binned
contig19508	2061984923	92	70.7	3770	Not Binned
contig19411	2061980592	5.6	70.1	3770	Not Binned
contig19474	2061983358	27.6	53.9	3766	Not Binned
contig14774	2061989708	6.1	67.7	3764	Not Binned
contig10219	2061984352	5.2	63.8	3764	Not Binned
contig02434	2061979015	4.1	69.1	3763	Not Binned
contig13538	2061975935	4	70.1	3763	Not Binned
contig11139	2061975444	3.6	63.8	3762	Not Binned
contig19533	2061986005	51.9	70.9	3761	Not Binned
contig12856	2061982350	5	69.1	3759	Not Binned
contig19591	2061988571	85	74.2	3758	Not Binned
contig19631	2061981314	3.6	63.7	3757	Not Binned
contig01834	2061983105	4.1	64	3756	Not Binned
contig19582	2061988170	157.9	57.9	3755	Not Binned
contig14697	2061984878	3.4	55.2	3754	Not Binned
contig01164	2061982863	3.6	62.7	3747	Not Binned
contig00570	2061983463	6	71.2	3744	Not Binned
contig19556	2061987007	97.2	68.6	3742	Not Binned
contig00339	2061974534	5.4	56.5	3742	Not Binned
contig19523	2061985564	69.6	65.6	3738	Not Binned
contig13150	2061975528	4.9	71.8	3734	Not Binned
contig01319	2061988597	3.4	61.5	3734	Not Binned
contig03517	2061972776	3.7	60.3	3727	Not Binned
contig03757	2061973555	3.4	67.8	3725	Not Binned
contig01013	2061977530	5.4	62.1	3720	Not Binned
contig19454	2061982476	56.1	72.2	3712	Not Binned
contig01585	2061975192	5.4	60.4	3709	Not Binned
contig12573	2061974994	3.2	61.3	3707	Not Binned
contig15125	2061973889	3.7	70.2	3706	Not Binned
contig19359	2061978266	6	69.5	3706	Not Binned
contig19447	2061982155	90.2	65.3	3705	Not Binned
contig10860	2061989951	6.1	64.6	3700	Not Binned
contig02630	2061985271	3.7	68.2	3697	Not Binned
contig00139	2061989492	33	65.9	3696	Not Binned
contig19495	2061984280	4.2	70.2	3695	Not Binned
contig02001	2061988277	4.9	70.7	3694	Not Binned
contig11561	2061982229	4.1	63.1	3693	Not Binned
contig19463	2061982877	4.5	59.7	3689	Not Binned
contig19535	2061986085	74	71.3	3688	Not Binned
contig12637	2061976335	2.6	60.3	3686	Not Binned
contig19517	2061985283	68.2	55.8	3683	Not Binned
contig13543	2061976056	3.9	69.5	3679	Not Binned
contig08176	2061972081	3.9	73.1	3677	Not Binned
contig04821	2061983950	4.5	72.1	3672	Not Binned
contig19433	2061981554	81.9	67.5	3671	Not Binned
contig19539	2061986286	88.6	67.9	3663	Not Binned
contig02541	2061982344	4.2	68.4	3658	Not Binned
contig12483	2061973436	64.2	56.4	3656	Not Binned
contig03420	2061986756	4.1	72	3655	Not Binned
contig01801	2061982062	4.9	68.1	3653	Not Binned
contig19977	2061983479	15.4	49.9	3652	Not Binned
contig01979	2061987636	5.4	72.2	3650	Not Binned
contig19660	2061989426	2.9	67.8	3650	Not Binned
contig02468	2061980099	2.9	65.9	3649	Not Binned
contig13329	2061971756	4	71.1	3643	Not Binned
contig12349	2061971673	68.5	69	3641	Not Binned
contig10900	2061991058	4.3	62.6	3639	Not Binned
contig16102	2061984558	13	62.9	3635	Not Binned
contig19624	2061978186	84.6	71	3634	Not Binned
contig10951	2061972123	3.3	64	3628	Not Binned
contig01729	2061979896	4.7	70.6	3626	Not Binned
contig01030	2061978212	3.3	61.4	3619	Not Binned
contig19470	2061983198	74.1	72.2	3618	Not Binned
contig01063	2061979214	5.8	64.4	3617	Not Binned
contig14611	2061976417	6.7	70.8	3609	Not Binned
contig15682	2061979424	5.7	70.7	3601	Not Binned
contig19939	2061981836	2	67.2	3600	Not Binned
contig01600	2061975766	3	61.8	3600	Not Binned
contig20052	2061986848	3.9	57.9	3600	Not Binned
contig00965	2061975806	4.2	65.7	3598	Not Binned
contig19829	2061976944	3	68	3595	Not Binned
contig19400	2061980111	71.1	50.5	3595	Not Binned
contig01872	2061984107	4.9	63.6	3593	Not Binned
contig11293	2061978138	3.9	57.2	3591	Not Binned
contig03944	2061978536	4.2	70.1	3589	Not Binned
contig19384	2061979348	12.1	57.5	3589	Not Binned
contig18106	2061989874	399.4	67.2	3584	Not Binned
contig19522	2061985524	67.4	64.8	3584	Not Binned
contig01661	2061977812	7.4	65.1	3581	Not Binned
contig19632	2061981755	44.7	70.8	3578	Not Binned
contig19572	2061987729	91.6	55.2	3578	Not Binned
contig11122	2061975280	6.1	69.3	3573	Not Binned
contig19478	2061983559	5.4	61.1	3573	Not Binned
contig19828	2061976904	4.6	59.9	3573	Not Binned
contig02600	2061984308	4.1	70.7	3566	Not Binned
contig02020	2061988798	4.2	61.3	3566	Not Binned
contig14734	2061989216	5.4	70.5	3565	Not Binned
contig01059	2061979134	4.5	64.4	3560	Not Binned
contig16430	2061971430	42.9	64	3559	Not Binned
contig01878	2061984307	4.8	61.9	3558	Not Binned
contig01552	2061974003	6.4	62	3557	Not Binned
contig19596	2061988771	30.6	69.4	3556	Not Binned
contig19648	2061988893	106.9	68.4	3556	Not Binned
contig19831	2061977024	83.6	68.2	3555	Not Binned
contig19642	2061986206	79.2	67.6	3553	Not Binned
contig19512	2061985083	4.9	65.6	3550	Not Binned
contig12641	2061976536	2.7	71.2	3545	Not Binned
contig03116	2061977573	3.8	69.7	3542	Not Binned
contig14540	2061970896	4.3	63.4	3542	Not Binned
contig01522	2061973101	4.7	68.4	3538	Not Binned
contig02389	2061977692	4.3	68.8	3537	Not Binned
contig12429	2061972944	5.3	72.4	3535	Not Binned
contig19620	2061976422	71.9	65.3	3534	Not Binned
contig03043	2061975194	5.8	69.7	3532	Not Binned
contig19609	2061971434	85.1	70.6	3530	Not Binned
contig16261	2061986883	5.4	60.7	3527	Not Binned
contig16154	2061985360	80.5	71.4	3525	Not Binned
contig19960	2061982758	56	66.3	3525	Not Binned
contig19604	2061989303	64.5	70.6	3524	Not Binned
contig01971	2061987355	4.4	68.1	3523	Not Binned
contig19702	2061971188	70.7	72.1	3513	Not Binned
contig01264	2061986592	4.3	62.3	3511	Not Binned
contig02319	2061975562	4.1	60.7	3509	Not Binned
contig03918	2061977815	32.7	72.5	3507	Not Binned
contig19489	2061984040	6.3	70.3	3506	Not Binned
contig02304	2061975070	3.2	63.5	3505	Not Binned
contig12850	2061982149	4.7	65.8	3501	Not Binned
contig19602	2061984401	26.6	62.7	3501	Not Binned
contig11089	2061974829	3.6	62	3496	Not Binned
contig11784	2061985196	4.5	70.1	3484	Not Binned
contig19703	2061971229	78.2	70.2	3483	Not Binned
contig04217	2061983749	4	64.8	3481	Not Binned
contig19625	2061978627	36	72	3481	Not Binned
contig09407	2061979380	5.2	61.8	3479	Not Binned
contig01089	2061980217	4.3	60.4	3476	Not Binned
contig00732	2061974125	5.9	63.3	3474	Not Binned
contig02710	2061987717	3.7	63.9	3474	Not Binned
contig20150	2061988976	4.1	56.3	3472	Not Binned
contig04004	2061980021	4.4	72.2	3471	Not Binned
contig01787	2061981782	4.6	56.1	3470	Not Binned
contig11992	2061988604	3.6	64.4	3470	Not Binned
contig08607	2061974828	3.3	72.3	3469	Not Binned
contig02913	2061971094	3.7	65.7	3465	Not Binned
contig19639	2061984883	69	66.1	3465	Not Binned
contig05612	2061976493	3.4	73.7	3464	Not Binned
contig19550	2061986767	2.5	64.4	3464	Not Binned
contig19655	2061989180	107.2	71.4	3463	Not Binned
contig01427	2061989986	5.2	68.4	3462	Not Binned
contig19465	2061982957	3.6	61.5	3462	Not Binned
contig00876	2061972567	5.7	68.7	3459	Not Binned
contig19525	2061985644	5.3	70	3458	Not Binned
contig00800	2061989903	3.8	69.1	3456	Not Binned
contig10421	2061986238	3.9	62.7	3455	Not Binned
contig19510	2061985003	134.6	68.8	3453	Not Binned
contig00235	2061971254	5.4	65	3452	Not Binned
contig02327	2061975767	4.8	72	3452	Not Binned
contig19555	2061986967	4.3	64.5	3450	Not Binned
contig13279	2061990773	4.4	64	3449	Not Binned
contig06521	2061982948	4.9	65.1	3447	Not Binned
contig16029	2061983394	10	66.3	3446	Not Binned
contig15721	2061979785	4.7	61.8	3445	Not Binned
contig13175	2061980867	4.8	67.9	3444	Not Binned
contig02551	2061982745	3.7	64.7	3444	Not Binned
contig02769	2061970971	4.5	64	3444	Not Binned
contig02049	2061974127	5.4	62.8	3442	Not Binned
contig19749	2061973320	3.9	64	3441	Not Binned
contig12863	2061982550	5	68.5	3439	Not Binned
contig01397	2061989125	4.9	68.9	3438	Not Binned
contig11652	2061983471	67.6	57.8	3438	Not Binned
contig00832	2061971009	4.9	70.4	3433	Not Binned
contig12650	2061976816	3.7	70.1	3433	Not Binned
contig13014	2061986360	3.1	69.9	3433	Not Binned
contig13177	2061981749	5.6	42.7	3432	Not Binned
contig01676	2061978253	3.1	59.6	3431	Not Binned
contig13779	2061979303	7	66.4	3430	Not Binned
contig15381	2061976137	5.2	63.4	3427	Not Binned
contig00152	2061989861	69.7	68.7	3426	Not Binned
contig02461	2061979857	3.8	72	3425	Not Binned
contig03118	2061977613	3.4	68.8	3425	Not Binned
contig16202	2061986121	69.9	73.8	3423	Not Binned
contig10939	2061971795	3.6	65.4	3422	Not Binned
contig08136	2061971835	3.4	62.1	3421	Not Binned
contig00920	2061974207	5.3	62.5	3420	Not Binned
contig01390	2061988920	6.1	71.3	3417	Not Binned
contig03879	2061976893	4.9	68.3	3417	Not Binned
contig07914	2061990565	5.7	72.8	3416	Not Binned
contig02108	2061989495	4.8	69.7	3408	Not Binned
contig19652	2061989057	83.4	67.8	3406	Not Binned
contig15016	2061972495	2.7	65	3404	Not Binned
contig19665	2061989631	3.4	63.7	3404	Not Binned
contig02539	2061982304	3.1	67.4	3403	Not Binned
contig11815	2061985637	71.6	66.4	3403	Not Binned
contig13629	2061977379	4.5	72.3	3402	Not Binned
contig02152	2061991012	2.9	61	3396	Not Binned
contig14371	2061987002	4	70.1	3394	Not Binned
contig01758	2061980739	3.6	60.4	3394	Not Binned
contig14248	2061985399	30.4	72.9	3392	Not Binned
contig19597	2061988811	3.3	65.7	3390	Not Binned
contig19691	2061990820	92.5	68.4	3388	Not Binned
contig15968	2061982673	5.1	70.7	3388	Not Binned
contig00900	2061973469	4.7	70	3385	Not Binned
contig19628	2061979991	70.1	72.8	3382	Not Binned
contig16119	2061984838	60	56.2	3380	Not Binned
contig00563	2061983223	4.8	68.7	3378	Not Binned
contig19694	2061990943	26.8	50.1	3377	Not Binned
contig19542	2061986406	6.5	61.1	3375	Not Binned
contig10944	2061972000	3	68	3371	Not Binned
contig19716	2061971803	82.6	69.4	3368	Not Binned
contig11442	2061980344	72.9	70.2	3363	Not Binned
contig19707	2061971393	67.6	66.4	3363	Not Binned
contig02441	2061979296	3.4	66.3	3362	Not Binned
contig19563	2061987328	5.8	69.5	3361	Not Binned
contig13499	2061975200	3.9	71.5	3360	Not Binned
contig19579	2061988050	5.8	69.8	3357	Not Binned
contig19708	2061971475	74.4	66.1	3354	Not Binned
contig11243	2061977256	5.2	62.9	3349	Not Binned
contig19689	2061990738	5.7	68	3348	Not Binned
contig01263	2061986552	4.4	62.1	3347	Not Binned
contig00897	2061973346	2.6	68.7	3346	Not Binned
contig01535	2061973470	7.1	66.4	3346	Not Binned
contig16893	2061972906	5.7	62.1	3344	Not Binned
contig19661	2061989467	22.6	50.1	3342	Not Binned
contig00697	2061988235	3.8	67.2	3339	Not Binned
contig03070	2061976090	4.7	69.2	3335	Not Binned
contig02795	2061979497	3.8	72	3331	Not Binned
contig13179	2061982631	4.7	51.3	3327	Not Binned
contig19720	2061972008	89.5	69.5	3326	Not Binned
contig19617	2061975042	6.7	60.5	3325	Not Binned
contig02431	2061978935	4.8	61.8	3324	Not Binned
contig08608	2061974869	5.1	71.7	3322	Not Binned
contig04253	2061984270	3.4	63.9	3315	Not Binned
contig19635	2061983078	14.2	64.5	3315	Not Binned
contig00783	2061989247	4.6	68.6	3313	Not Binned
contig00726	2061972321	4.6	60.9	3312	Not Binned
contig04794	2061981304	2.7	70.8	3311	Not Binned
contig12912	2061983753	6.8	71.3	3310	Not Binned
contig19710	2061971557	79.1	67.9	3304	Not Binned
contig05211	2061971998	4.5	62.7	3304	Not Binned
contig19736	2061972705	74.5	69.9	3302	Not Binned
contig14088	2061983233	4.2	61.9	3301	Not Binned
contig20000	2061984563	4	60.7	3301	Not Binned
contig03047	2061975358	4.2	72.3	3300	Not Binned
contig12782	2061980385	3.4	65.9	3300	Not Binned
contig14799	2061990118	3.7	61.4	3300	Not Binned
contig00679	2061987674	5.6	67.7	3299	Not Binned
contig02102	2061989331	5.9	69.9	3299	Not Binned
contig04389	2061985915	5.1	61.9	3297	Not Binned
contig19746	2061973156	84.8	67.7	3292	Not Binned
contig02090	2061988921	3.8	53.9	3292	Not Binned
contig01894	2061984950	5.9	69.6	3290	Not Binned
contig01996	2061988157	5.4	64.4	3290	Not Binned
contig02196	2061972077	4.6	69.2	3289	Not Binned
contig04088	2061981704	4.2	58.2	3287	Not Binned
contig12634	2061976215	4.3	66.1	3287	Not Binned
contig15895	2061981710	5.5	51.7	3281	Not Binned
contig19619	2061975981	6.2	59.1	3280	Not Binned
contig00574	2061983624	5.5	70.1	3276	Not Binned
contig19706	2061971352	81.7	70.7	3274	Not Binned
contig10222	2061984474	4.2	66.2	3273	Not Binned
contig13984	2061981990	5.5	66.6	3273	Not Binned
contig20005	2061984763	2.8	63.9	3267	Not Binned
contig02326	2061975726	3.1	66.6	3265	Not Binned
contig03973	2061978977	3.6	69.6	3264	Not Binned
contig03323	2061983868	4.1	65.6	3264	Not Binned
contig19651	2061989016	10.6	64.4	3260	Not Binned
contig19763	2061973935	84.9	68	3259	Not Binned
contig09870	2061981466	3.7	67.1	3257	Not Binned
contig02086	2061987516	4.4	61	3256	Not Binned
contig10098	2061983270	4	62.6	3256	Not Binned
contig00820	2061990600	4.8	68.7	3254	Not Binned
contig06448	2061982307	3.3	72.7	3253	Not Binned
contig20036	2061986126	3.8	70.9	3253	Not Binned
contig02767	2061990644	2.6	64.2	3251	Not Binned
contig02515	2061981783	2.4	68.6	3249	Not Binned
contig10251	2061984834	4.7	71.4	3246	Not Binned
contig13397	2061973478	4.1	71.2	3245	Not Binned
contig04232	2061984110	3.9	70.9	3238	Not Binned
contig02826	2061986635	4.2	71.1	3237	Not Binned
contig01159	2061982703	4.1	64.1	3237	Not Binned
contig01470	2061971297	4.8	59.7	3236	Not Binned
contig02524	2061981903	3.1	70.2	3234	Not Binned
contig02334	2061976009	3.4	63.8	3233	Not Binned
contig12624	2061976015	3.5	65.7	3233	Not Binned
contig14417	2061987483	4.8	60.3	3230	Not Binned
contig12994	2061985879	5.7	68	3229	Not Binned
contig15613	2061978703	3.6	63.3	3229	Not Binned
contig19584	2061988250	4.6	62.7	3229	Not Binned
contig19776	2061974509	45	60.5	3229	Not Binned
contig00964	2061975765	3.7	70	3227	Not Binned
contig02620	2061984991	3.4	70.3	3227	Not Binned
contig19810	2061976102	76.8	69.1	3226	Not Binned
contig04184	2061983268	3.8	72.4	3225	Not Binned
contig01117	2061981179	4.5	72	3225	Not Binned
contig03018	2061974456	4.3	72.7	3222	Not Binned
contig01024	2061977971	6.2	69.7	3220	Not Binned
contig19779	2061974673	89.7	69.1	3220	Not Binned
contig01170	2061983144	4.2	70.3	3217	Not Binned
contig02084	2061987075	5.9	61.8	3217	Not Binned
contig10218	2061984312	6.1	68	3216	Not Binned
contig19612	2061972787	6.6	69.2	3214	Not Binned
contig19809	2061976062	31.9	59.2	3213	Not Binned
contig02749	2061970889	4.5	70.5	3212	Not Binned
contig10920	2061971344	4.1	69.8	3211	Not Binned
contig19741	2061972951	58.7	62.3	3206	Not Binned
contig04375	2061985674	3	65.6	3205	Not Binned
contig04816	2061983509	3.8	67.4	3204	Not Binned
contig00788	2061989493	4.4	69.2	3203	Not Binned
contig19770	2061974263	58.7	66.9	3202	Not Binned
contig12676	2061977498	54.2	66	3202	Not Binned
contig10870	2061990156	5.4	70.2	3201	Not Binned
contig10991	2061973025	4.5	68.7	3198	Not Binned
contig19840	2061977425	74.5	67.8	3198	Not Binned
contig01547	2061973798	3.7	62.2	3198	Not Binned
contig07104	2061987119	4	66.8	3197	Not Binned
contig00652	2061986471	5.1	67.7	3197	Not Binned
contig12524	2061974174	4	71.1	3189	Not Binned
contig01795	2061981902	3.7	62.8	3188	Not Binned
contig19723	2061972131	70	71.6	3188	Not Binned
contig14337	2061986361	7.2	69.4	3188	Not Binned
contig19834	2061977144	72.6	72	3187	Not Binned
contig02387	2061977612	3.5	67.4	3187	Not Binned
contig19688	2061990697	5.9	69.8	3185	Not Binned
contig20092	2061988612	2.5	67.7	3180	Not Binned
contig13621	2061977258	4.1	60.2	3179	Not Binned
contig15933	2061982272	77.1	69.2	3177	Not Binned
contig19765	2061974017	5.6	66.4	3175	Not Binned
contig19782	2061974796	111.7	67	3175	Not Binned
contig01119	2061981259	4.4	64.1	3175	Not Binned
contig16093	2061984356	4.3	73	3174	Not Binned
contig08765	2061975689	3.1	62.3	3173	Not Binned
contig19872	2061978828	3	61.2	3172	Not Binned
contig01514	2061972896	5.5	70.4	3168	Not Binned
contig19524	2061985604	5	57.6	3166	Not Binned
contig19595	2061988731	2.4	70	3165	Not Binned
contig19711	2061971598	8.3	68.1	3165	Not Binned
contig01527	2061973265	4.2	71.3	3164	Not Binned
contig11578	2061982429	5.2	68	3164	Not Binned
contig02594	2061984148	3.1	67.5	3163	Not Binned
contig19693	2061990902	13.5	67.5	3161	Not Binned
contig02144	2061990725	3.5	63.9	3160	Not Binned
contig19992	2061984161	61.1	69.2	3158	Not Binned
contig01241	2061985791	3.2	63.1	3158	Not Binned
contig00879	2061972690	3.5	63.6	3158	Not Binned
contig11568	2061982309	4.9	62.5	3158	Not Binned
contig04678	2061979940	4.3	69.7	3157	Not Binned
contig02708	2061987677	5.9	68.2	3155	Not Binned
contig00703	2061988516	3.5	59.2	3154	Not Binned
contig10506	2061986999	4.4	71.1	3154	Not Binned
contig01144	2061982262	3.7	61.1	3153	Not Binned
contig02077	2061984429	4.4	62	3152	Not Binned
contig02604	2061984470	3.7	71.4	3151	Not Binned
contig14920	2061971470	4.1	63.7	3150	Not Binned
contig19823	2061976663	56.5	61.7	3149	Not Binned
contig12706	2061978380	4.6	70.1	3148	Not Binned
contig20293	2061975289	3.7	68.6	3147	Not Binned
contig05182	2061971506	4.6	70.4	3145	Not Binned
contig02566	2061983266	3.4	70.5	3144	Not Binned
contig20313	2061976223	13.6	66.2	3141	Not Binned
contig11951	2061987762	3.7	69.1	3139	Not Binned
contig01359	2061979977	6.1	67	3138	Not Binned
contig11173	2061976134	4	61.2	3135	Not Binned
contig19867	2061978587	4.1	55.4	3135	Not Binned
contig00802	2061989944	4.8	68.9	3133	Not Binned
contig15396	2061976257	3	63.4	3128	Not Binned
contig11706	2061984193	5	66.3	3127	Not Binned
contig12614	2061975773	4.3	68.1	3127	Not Binned
contig19658	2061989344	6.8	64.1	3127	Not Binned
contig08851	2061976293	4.5	72.8	3123	Not Binned
contig00656	2061986672	4.1	56.6	3121	Not Binned
contig11017	2061973599	76.9	71.7	3117	Not Binned
contig00489	2061980497	6.1	63	3116	Not Binned
contig05536	2061975401	5.4	63.3	3116	Not Binned
contig19786	2061974960	101.4	69.1	3115	Not Binned
contig12894	2061983312	4.2	70.9	3114	Not Binned
contig19851	2061977906	25	68.9	3110	Not Binned
contig01972	2061987395	2.9	69.3	3107	Not Binned
contig19890	2061979630	62.7	65.2	3107	Not Binned
contig02242	2061973512	2.9	68	3106	Not Binned
contig11810	2061985517	3.7	70.4	3106	Not Binned
contig19724	2061972172	10.7	70.8	3105	Not Binned
contig07387	2061972327	7	61.4	3105	Not Binned
contig19801	2061975698	69.6	66.2	3104	Not Binned
contig13552	2061976176	2.8	63.2	3104	Not Binned
contig15579	2061978302	5.1	64.4	3103	Not Binned
contig19841	2061977465	52.5	54.4	3103	Not Binned
contig00495	2061980737	5.7	60.2	3102	Not Binned
contig01011	2061977450	8	58.2	3102	Not Binned
contig00901	2061973510	5.3	68.3	3101	Not Binned
contig04050	2061980943	5.2	69.5	3100	Not Binned
contig19891	2061979670	87.3	71.1	3098	Not Binned
contig01052	2061978893	4	60.9	3096	Not Binned
contig10612	2061988042	3.4	63.7	3095	Not Binned
contig00950	2061975232	3.7	65.1	3094	Not Binned
contig08182	2061972163	5.1	74.9	3092	Not Binned
contig03076	2061976250	6.9	72.8	3088	Not Binned
contig19787	2061975001	76.2	68.1	3088	Not Binned
contig19830	2061976984	81.9	70.8	3088	Not Binned
contig00871	2061972362	5	65.7	3086	Not Binned
contig00831	2061991051	4.1	68.9	3083	Not Binned
contig03448	2061987558	3.9	72.7	3082	Not Binned
contig13121	2061984395	2.7	70.9	3075	Not Binned
contig02176	2061971462	4.3	65.1	3073	Not Binned
contig19684	2061990492	3.6	66.5	3073	Not Binned
contig01100	2061980578	7.3	66	3072	Not Binned
contig03471	2061988159	4.2	71.5	3070	Not Binned
contig07037	2061986597	3.9	71.9	3068	Not Binned
contig19637	2061983960	4.3	59.8	3068	Not Binned
contig08895	2061976654	4.1	49.4	3066	Not Binned
contig02772	2061972324	3.7	64.3	3066	Not Binned
contig19666	2061989672	8.3	68.1	3065	Not Binned
contig19682	2061990410	8.5	61.9	3065	Not Binned
contig19799	2061975616	4	56.6	3065	Not Binned
contig19732	2061972541	3.4	62.9	3064	Not Binned
contig02792	2061978174	8.5	70.2	3062	Not Binned
contig02682	2061986795	4.3	66.4	3061	Not Binned
contig14176	2061984355	3.7	72.5	3059	Not Binned
contig13856	2061980507	7.3	66.6	3058	Not Binned
contig03830	2061975646	3.9	71	3057	Not Binned
contig07101	2061987038	4	71.5	3056	Not Binned
contig12962	2061984917	1.8	68.8	3056	Not Binned
contig00773	2061988878	4	65.1	3052	Not Binned
contig15153	2061974094	5.4	69	3051	Not Binned
contig02310	2061975275	4.2	71.8	3050	Not Binned
contig02998	2061973800	4.6	71.6	3049	Not Binned
contig11685	2061983993	65.2	65.7	3047	Not Binned
contig20222	2061972091	2.8	62.3	3046	Not Binned
contig10268	2061985035	3.8	72.5	3044	Not Binned
contig19748	2061973279	5	64.6	3044	Not Binned
contig02416	2061978454	4.4	68.9	3043	Not Binned
contig13244	2061989871	5.1	68.1	3043	Not Binned
contig04255	2061984310	3.1	66.2	3043	Not Binned
contig12916	2061983833	3.7	67.5	3042	Not Binned
contig12768	2061980025	5.2	62.3	3037	Not Binned
contig01088	2061980177	4.8	67	3033	Not Binned
contig00910	2061973838	5.8	66.8	3033	Not Binned
contig17752	2061986724	9.2	68.3	3030	Not Binned
contig02853	2061989414	4.2	69.2	3029	Not Binned
contig01809	2061982383	4.7	66	3027	Not Binned
contig11999	2061988644	3.5	71.8	3026	Not Binned
contig15588	2061978382	4.2	62.3	3025	Not Binned
contig19947	2061982156	55.3	70.3	3023	Not Binned
contig02231	2061973184	2.7	70.9	3020	Not Binned
contig19613	2061973238	83.6	63.5	3019	Not Binned
contig19673	2061990000	5.5	64.3	3018	Not Binned
contig01807	2061982303	3	63.7	3018	Not Binned
contig19811	2061976142	68.7	45.4	3015	Not Binned
contig10452	2061986558	6.6	66.3	3012	Not Binned
contig13197	2061987523	5.7	68.1	3010	Not Binned
contig06130	2061980262	4.7	61.7	3010	Not Binned
contig19880	2061979189	69.4	69.4	3008	Not Binned
contig00757	2061983063	5.2	72.4	3006	Not Binned
contig19754	2061973525	4.5	62.3	3003	Not Binned
contig01487	2061971912	5.6	70	3001	Not Binned
contig10595	2061987761	4.9	74.1	2998	Not Binned
contig19690	2061990779	60.3	68.1	2997	Not Binned
contig12923	2061983994	5.4	67.3	2995	Not Binned
contig02895	2061990685	4	72.2	2993	Not Binned
contig03082	2061976491	4.1	58.6	2993	Not Binned
contig02341	2061976089	4.1	61.3	2992	Not Binned
contig19925	2061981194	78.1	69.5	2989	Not Binned
contig01779	2061981461	3.8	61.6	2988	Not Binned
contig04122	2061982226	2.9	69.3	2987	Not Binned
contig02399	2061977973	3.6	64.1	2986	Not Binned
contig13151	2061975975	4.4	70.2	2985	Not Binned
contig05673	2061976773	4.6	72.7	2984	Not Binned
contig13114	2061970895	7.2	68	2984	Not Binned
contig19930	2061981435	75.7	69.9	2984	Not Binned
contig19982	2061983720	28	71.8	2981	Not Binned
contig00341	2061974657	4.4	61.7	2979	Not Binned
contig04056	2061981103	3	69.2	2978	Not Binned
contig19647	2061988411	3.6	65.7	2978	Not Binned
contig19837	2061977264	3.5	63.8	2977	Not Binned
contig18032	2061989054	5.1	56.8	2974	Not Binned
contig13368	2061972740	5.5	68.8	2972	Not Binned
contig11370	2061979141	4.4	58.4	2972	Not Binned
contig15266	2061974955	5.1	64.3	2969	Not Binned
contig11337	2061978780	4.3	74	2965	Not Binned
contig04249	2061984230	4.6	56	2962	Not Binned
contig19990	2061984081	78	67.9	2961	Not Binned
contig00591	2061984225	5.9	66.2	2961	Not Binned
contig12934	2061984194	4.1	70.9	2960	Not Binned
contig12784	2061980466	2.8	60.1	2958	Not Binned
contig19852	2061977946	41.5	69.6	2957	Not Binned
contig13558	2061976256	3.6	59.8	2956	Not Binned
contig02945	2061971955	4.1	69.1	2950	Not Binned
contig13202	2061988928	5.7	68.6	2949	Not Binned
contig19882	2061979269	6	69.2	2949	Not Binned
contig03817	2061975236	3.9	71.1	2948	Not Binned
contig17463	2061981591	78.3	67.4	2946	Not Binned
contig12828	2061981508	3.5	68.6	2946	Not Binned
contig03167	2061979097	4.6	62.5	2946	Not Binned
contig01415	2061989658	5.6	68.6	2945	Not Binned
contig01939	2061986433	5	69.9	2945	Not Binned
contig03881	2061976933	4.4	71.4	2945	Not Binned
contig02590	2061984028	2.8	63.7	2944	Not Binned
contig19857	2061978146	3.2	64.6	2944	Not Binned
contig02955	2061972283	3.1	70.6	2942	Not Binned
contig01788	2061981822	5.3	70	2940	Not Binned
contig13409	2061973724	5	69.2	2940	Not Binned
contig14666	2061982632	2.7	69.1	2939	Not Binned
contig19979	2061983600	24.1	72	2939	Not Binned
contig08178	2061972122	2.8	69.9	2939	Not Binned
contig02332	2061975888	4.3	61.8	2938	Not Binned
contig02344	2061976169	2.9	54.5	2938	Not Binned
contig09875	2061981506	3	71.2	2936	Not Binned
contig19700	2061971106	5.1	62.4	2936	Not Binned
contig19844	2061977585	37.8	65.2	2935	Not Binned
contig19902	2061980192	2.5	64.9	2934	Not Binned
contig19728	2061972377	5.3	69.4	2933	Not Binned
contig02807	2061982625	4.4	70.1	2932	Not Binned
contig19858	2061978227	74.1	68.6	2927	Not Binned
contig00855	2061971747	3.1	64.1	2927	Not Binned
contig01466	2061971174	3.5	61.1	2926	Not Binned
contig11556	2061982108	3.6	68.5	2925	Not Binned
contig19921	2061981034	46.8	59.6	2925	Not Binned
contig19907	2061980392	64	68.4	2924	Not Binned
contig00686	2061987834	7.8	69.3	2924	Not Binned
contig11244	2061977337	3	44	2923	Not Binned
contig01109	2061980939	5.3	68.4	2922	Not Binned
contig02301	2061974947	3.2	69	2921	Not Binned
contig02705	2061987557	5.1	68.9	2918	Not Binned
contig02000	2061988237	6.6	69.7	2915	Not Binned
contig03588	2061988964	3	69.8	2915	Not Binned
[truncated: 7,419 more rows]
