# Supplementary material for: Proteogenomic Analysis of a Thermophilic Bacterial Consortium Adapted to Deconstruct Switchgrass
Source: PLoS One. 2013 Jul 19;8(7):e68465. doi: 10.1371/journal.pone.0068465 (PMC3716776; doi:10.1371/journal.pone.0068465)
Supplement: File S2 — Comparison of average read coverage of the metagenomic clusters versus 16S rRNA composition of the consortium, with and without correcting for average 16S rRNA copy number in sequenced reference genomes. (XLSX) [file pone.0068465.s002.xlsx]

## Sheet: 16S vs metagenome
16S rRNA composition from Gladden et al., Applied and environmental microbiology 2011, 77: 5804–5812. Table S1:
OTU ID	Genbank	JP-9 1%SG
Thermus thermophilus str. JN2	AY554280.1	39.33
Paenibacillus kobensis str. DSM 10249	AB073363.1	24.59
Rhodothermus marinus it-14	EU214602.1	9.62
Paenibacillus sp. D273a	FJ430033.1	8.77
Paenibacillus sp. str. SAFN-007	AY167820.1	4.53
Thermobacillus sp. str. KWC4	AB254031.3	2.54
Gemm-5 cluster 4	AY493977.1	2.05
Thermobaculum terrenum	AF391972.1	1.43
Thermomicrobia	DQ490006.1	1.18
Sphaerobacter thermophilus	AJ420142.1	0.48
Bradyrhizobiales	EU491413.1	0.44
Geobacillus sp. R5.03	EF105452.1	0.26
Gemm-1c	EU335153.1	0.25
Brevibacillus sp. A296	FJ429992.1	0.25
Thermoleiphilaceae	EF019514.1	0.21
Thermus antranikianii str. HN3-10	Y18413.1	0.16
bin	metagenome	16S	avg copy #	corrected
Thermus	74.7388	39.33	2	19.665
Rhodothermus	71.2025	9.62	1	9.62
Gemmatimonas	34.5004	2.05	1	2.05
Paenibacillus	26.0529	24.59	11.8	2.0839
Thermobaculum	8.68227	1.43	2	0.715
Sphaerobacter	6.30482	0.48	2	0.24
Thermomicrobium	6.17055	1.18	1	1.18
Hyphomicrobium	5.74187	0.44	1	0.44

## Sheet: reference genomes 16S rRNA copy
Strain	RefSeq	16S rRNA Count
Thermus thermophilus HB27	NC_005835.1	2
Thermus thermophilus HB8	NC_006461.1	2
Thermus scotoductus SA-01	NC_014974.1	2
Paenibacillus mucilaginosus KNP414	NC_015690.1	13
Paenibacillus polymyxa E681	NC_014483.1	12
Paenibacillus polymyxa SC2	NC_014622.1	14
Paenibacillus sp. JDR-2	NC_012914.1	12
Paenibacillus sp. Y412MC10	NC_013406.1	8
Rhodothermus marinus DSM 4252	NC_013501.1	1
Gemmatimonas aurantiaca T-27	NC_012489.1	1
Thermobaculum terrenum ATCC BAA-798	NC_013525.1, NC_013526.1	2
Thermomicrobium roseum DSM 5159	NC_011959.1	1
Sphaerobacter thermophilus DSM 20745	NC_013523.1, NC_013524.1	2
Hyphomicrobium denitrificans ATCC 51888	NC_014313.1	1
Hyphomicrobium sp. MC1	NC_015717.1	1
Averages:
Thermus		2
Paenibacillus		11.8
Rhodothermus		1
Gemmatimonadetes		1
Thermobaculum		2
Thermomicrobium		1
Sphaerobacter		2
Hyphomicrobium		1
