# Supplementary material for: Proteogenomic Analysis of a Thermophilic Bacterial Consortium Adapted to Deconstruct Switchgrass
Source: PLoS One. 2013 Jul 19;8(7):e68465. doi: 10.1371/journal.pone.0068465 (PMC3716776; doi:10.1371/journal.pone.0068465)
Supplement: File S4 — Lignocellulolytic enzymes identified based on dbCAN [25] , blastp against a local copy of the CAZy [26] and FOLy [27] databases (E<1e−20), and bacterial laccases [28] , [29] . Also includes a table of CAZy enzymes found per phylogenetic bin, and a comparison of glycoside hydrolase content in termite hindgut [72], cow rumen [12], a switchgrass adapted compost community [7], leafcutter ant garden [73], and anaerobic microbial community decomposing poplar wood chips [74], and thermophilic cellulose-degrading sludge [75]. (XLSX) [file pone.0068465.s004.xlsx]

## Sheet: dbCAN + FOLy + laccases
IMG Gene Object ID	Locus Tag	Scaffold	bin	Coordinates	Product_name	DNA_length	Protein_length	GC	Signal_peptide	Transmembrane	COG	COG info	COG E-value	COG_category	pfam	pfam info	pfam E-value	KO	KO info	KO E-value	KEGG_module	TIGR	TIGR info	TIGR E-value	EC	EC info	dbCAN	CAZy/FOLy best BLAST	CAZy/FOLy best EC	Laccase blast
2061975647	sg4i_00018950	contig18203	Gemmatimonadetes	11193..12380(+)	Putative multicopper oxidases	1188bp	395aa	0.68			COG2132	Putative multicopper oxidases	1e-26	[Q] Secondary metabolites biosynthesis, transport and catabolism	pfam00394; pfam07731; pfam07732	Cu-oxidase; Cu-oxidase_2; Cu-oxidase_3	3.1e-11; 1.0e-22; 3.1e-09					TIGR01409	Tat (twin-arginine translocation) pathway signal sequence	2.5e-05						Laccase
2061978284	sg4i_00045320	contig18214	Gemmatimonadetes	59153..60184(-)	Putative multicopper oxidases	1032bp	343aa	0.66	Yes		COG2132	Putative multicopper oxidases	2e-16	[Q] Secondary metabolites biosynthesis, transport and catabolism	pfam07732	Cu-oxidase_3	4.5e-11	KO:K00368	nitrite reductase (NO-forming) [EC:1.7.2.1]	2e-64		TIGR02376	nitrite reductase, copper-containing	2.1e-50	1.7.2.1	Nitrite reductase (NO-forming).				Laccase
2061998892	sg4i_00251400	contig11265	Gemmatimonadetes	97125..98207(+)	Putative multicopper oxidases	1083bp	360aa	0.68			COG2132	Putative multicopper oxidases	6e-18	[Q] Secondary metabolites biosynthesis, transport and catabolism	pfam07731; pfam07732	Cu-oxidase_2; Cu-oxidase_3	3.1e-15; 5.1e-24					TIGR01409; TIGR02376	Tat (twin-arginine translocation) pathway signal sequence; nitrite reductase, copper-containing	5.1e-05; 1.7e-14						Laccase
2062003540	sg4i_00297880	contig00057	Gemmatimonadetes	91148..91987(+)	Uncharacterized conserved protein	840bp	279aa	0.77			COG1496	Uncharacterized conserved protein	5e-34	[S] Function unknown	pfam02578	Cu-oxidase_4	3.7e-46	KO:K05810	conserved hypothetical protein	4e-39		TIGR00726	conserved hypothetical protein TIGR00726	1.6e-21						Laccase
2061999263	sg4i_00255110	contig00053	Gemmatimonadetes	17615..19723(-)	Putative multicopper oxidases	2109bp	702aa	0.7			COG2132	Putative multicopper oxidases	2e-52	[Q] Secondary metabolites biosynthesis, transport and catabolism	pfam00394; pfam07731; pfam07732	Cu-oxidase; Cu-oxidase_2; Cu-oxidase_3	6.1e-08; 4.0e-27; 3.7e-32											LO1		Laccase
2061977686	sg4i_00039340	contig18211	Gemmatimonadetes	51567..52520(+)	Carbohydrate binding domain.	954bp	317aa	0.66	Yes						pfam02839	CBM_5_12	3.1e-06										CBM12
2061991417	sg4i_00176650	contig00360	Gemmatimonadetes	100415..101653(-)	fagellar hook-basal body proteins	1239bp	412aa	0.67			COG1749	Flagellar hook protein FlgE	1e-79	[N] Cell motility	pfam00460; pfam06429; pfam07559	Flg_bb_rod; DUF1078; FlaE	3.3e-10; 3.7e-15; 7.2e-14	KO:K02390	flagellar hook protein FlgE	6e-106		TIGR03506; TIGR01396	fagellar hook-basal body proteins; flagellar basal-body rod protein FlgB	3.7e-116; 6.6e-07			CBM35
2061977332	sg4i_00035800	contig00248	Gemmatimonadetes	54748..56214(+)	hypothetical protein	1467bp	488aa	0.73	Yes																		CBM46
2061977020	sg4i_00032680	contig00242	Gemmatimonadetes	40034..40552(+)	1,4-alpha-glucan branching enzyme	519bp	172aa	0.74		Yes	COG0296	1,4-alpha-glucan branching enzyme	4e-07	[G] Carbohydrate transport and metabolism	pfam02922	CBM_48	1.7e-11										CBM48
2061977022	sg4i_00032700	contig00242	Gemmatimonadetes	41184..42353(+)	Carbohydrate-binding module 48 (Isoamylase N-terminal domain).	1170bp	389aa	0.75	Yes						pfam02922	CBM_48	5.9e-05										CBM48
2062037322	sg4i_00635700	contig18193	Gemmatimonadetes	61625..62260(-)	1,4-alpha-glucan branching enzyme	636bp	211aa	0.75		Yes	COG0296	1,4-alpha-glucan branching enzyme	9e-09	[G] Carbohydrate transport and metabolism	pfam02922	CBM_48	2.5e-09										CBM48
2061978416	sg4i_00046640	contig18215	Gemmatimonadetes	16620..17753(-)	Uncharacterized protein containing LysM domain	1134bp	377aa	0.73	Yes		COG1652	Uncharacterized protein containing LysM domain	2e-08	[S] Function unknown	pfam01476	LysM	7.2e-08										CBM50
2061983902	sg4i_00101500	contig00303	Gemmatimonadetes	7922..8800(-)	FOG: LysM repeat	879bp	292aa	0.72	Yes		COG1388	FOG: LysM repeat	1e-09	[M] Cell wall/membrane/envelope biogenesis	pfam01476	LysM	9.6e-14										CBM50
2061998903	sg4i_00251510	contig11265	Gemmatimonadetes	107769..109622(+)	D-alanyl-D-alanine carboxypeptidase, serine-type, PBP4 family	1854bp	617aa	0.71	Yes		COG2027	D-alanyl-D-alanine carboxypeptidase (penicillin-binding protein 4)	1e-65	[M] Cell wall/membrane/envelope biogenesis	pfam01476; pfam02113	LysM; Peptidase_S13	3.1e-12; 3.5e-69	KO:K07259	D-alanyl-D-alanine carboxypeptidase / D-alanyl-D-alanine-endopeptidase (penicillin-binding protein 4) [EC:3.4.16.4 3.4.99.-]	3e-73		TIGR00666	D-alanyl-D-alanine carboxypeptidase, serine-type, PBP4 family	4.4e-73	3.4.16.4; 3.4.99.-	Serine-type D-Ala-D-Ala carboxypeptidase.; Hydrolases. Acting on peptide bonds (peptide hydrolases). Endopeptidases of unknown catalytic mechanism.	CBM50
2061987735	sg4i_00139830	contig00331	Gemmatimonadetes	106173..107165(-)	Domain of unknown function (DUF1083).	993bp	330aa	0.74							pfam06452	DUF1083	9.1e-07										CBM9
2061977026	sg4i_00032740	contig00242	Gemmatimonadetes	43858..44532(-)	Predicted esterase	675bp	224aa	0.73			COG0400	Predicted esterase	9e-24	[R] General function prediction only	pfam02230	Abhydrolase_2	3e-28										CE1
2061979238	sg4i_00054860	contig00260	Gemmatimonadetes	3665..4762(-)	Dienelactone hydrolase and related enzymes	1098bp	365aa	0.74			COG0412	Dienelactone hydrolase and related enzymes	1e-09	[Q] Secondary metabolites biosynthesis, transport and catabolism													CE1
2061987659	sg4i_00139070	contig00331	Gemmatimonadetes	29607..31352(-)	Enterochelin esterase and related enzymes	1746bp	581aa	0.72	Yes	Yes	COG2382	Enterochelin esterase and related enzymes	6e-06	[P] Inorganic ion transport and metabolism	pfam00756	Esterase	4e-11										CE1
2062002955	sg4i_00292030	contig00452	Gemmatimonadetes	55559..56383(+)	Predicted hydrolases or acyltransferases (alpha/beta hydrolase superfamily)	825bp	274aa	0.73			COG0596	Predicted hydrolases or acyltransferases (alpha/beta hydrolase superfamily)	7e-27	[R] General function prediction only	pfam00561	Abhydrolase_1	1.3e-26					TIGR02427	3-oxoadipate enol-lactonase	3.1e-42			CE1
2062037373	sg4i_00636210	contig18193	Gemmatimonadetes	110182..111288(-)	Predicted peptidase	1107bp	368aa	0.72			COG4099	Predicted peptidase	3e-35	[R] General function prediction only	pfam00326	Peptidase_S9	1.9e-13										CE1	CE1
2061977681	sg4i_00039290	contig18211	Gemmatimonadetes	47080..49437(+)	Dipeptidyl aminopeptidases/acylaminoacyl-peptidases	2358bp	785aa	0.68	Yes	Yes	COG1506	Dipeptidyl aminopeptidases/acylaminoacyl-peptidases	2e-42	[E] Amino acid transport and metabolism	pfam00326; pfam00930	Peptidase_S9; DPPIV_N	3.5e-44; 3.5e-55										CE1	CE10
2061977806	sg4i_00040540	contig00251	Gemmatimonadetes	52706..54820(+)	Dipeptidyl aminopeptidases/acylaminoacyl-peptidases	2115bp	704aa	0.68	Yes	Yes	COG1506	Dipeptidyl aminopeptidases/acylaminoacyl-peptidases	2e-53	[E] Amino acid transport and metabolism	pfam00326; pfam00930	Peptidase_S9; DPPIV_N	2.0e-49; 1.9e-73	KO:K01278	dipeptidyl-peptidase 4 [EC:3.4.14.5]	5e-103		TIGR01435	glutamate--cysteine ligase/gamma-glutamylcysteine synthetase, Streptococcus agalactiae type	0.074	3.4.14.5	Dipeptidyl-peptidase IV.	CE1	CE10
2061989947	sg4i_00161950	contig13481	Gemmatimonadetes	11470..14115(+)	Dipeptidyl aminopeptidases/acylaminoacyl-peptidases	2646bp	881aa	0.67	Yes		COG1506	Dipeptidyl aminopeptidases/acylaminoacyl-peptidases	2e-41	[E] Amino acid transport and metabolism	pfam00326; pfam00930	Peptidase_S9; DPPIV_N	4.3e-35; 1.8e-44										CE1	CE10
2061989951	sg4i_00161990	contig13481	Gemmatimonadetes	17047..19674(-)	WD40-like Beta Propeller Repeat./Prolyl oligopeptidase family.	2628bp	875aa	0.71	Yes	Yes	COG1506	Dipeptidyl aminopeptidases/acylaminoacyl-peptidases	2e-34	[E] Amino acid transport and metabolism	pfam00326; pfam07676	Peptidase_S9; PD40	3.4e-21; 1.7e-03										CE1	CE10
2061977039	sg4i_00032870	contig00242	Gemmatimonadetes	57164..57988(-)	Dienelactone hydrolase and related enzymes	825bp	274aa	0.72			COG0412	Dienelactone hydrolase and related enzymes	1e-05	[Q] Secondary metabolites biosynthesis, transport and catabolism	pfam00561	Abhydrolase_1	6.8e-09										CE10
2061987702	sg4i_00139500	contig00331	Gemmatimonadetes	74076..76196(+)	prolyl oligopeptidase (EC:3.4.21.26). Serine peptidase. MEROPS family S09A	2121bp	706aa	0.69			COG1505	Serine proteases of the peptidase family S9A		[E] Amino acid transport and metabolism	pfam00326; pfam02897	Peptidase_S9; Peptidase_S9_N	6.9e-70; 0.0e+00	KO:K01322	prolyl oligopeptidase [EC:3.4.21.26]						3.4.21.26	Prolyl oligopeptidase.	CE10
2062024312	sg4i_00505600	contig00082	Gemmatimonadetes	83396..84523(-)	Dipeptidyl aminopeptidases/acylaminoacyl-peptidases	1128bp	375aa	0.69	Yes	Yes	COG1506	Dipeptidyl aminopeptidases/acylaminoacyl-peptidases	2e-40	[E] Amino acid transport and metabolism	pfam00326	Peptidase_S9	1.7e-37										CE10
2061983917	sg4i_00101650	contig00303	Gemmatimonadetes	29219..31219(+)	Dipeptidyl aminopeptidases/acylaminoacyl-peptidases	2001bp	666aa	0.72	Yes		COG1506	Dipeptidyl aminopeptidases/acylaminoacyl-peptidases	3e-75	[E] Amino acid transport and metabolism	pfam00326; pfam07676; pfam07676	Peptidase_S9; PD40; PD40	5.4e-49; 1.2e-05; 7.1e-02										CE10	CE10
2062002952	sg4i_00292000	contig00452	Gemmatimonadetes	51146..53566(-)	Dipeptidyl aminopeptidases/acylaminoacyl-peptidases	2421bp	806aa	0.71	Yes		COG1506	Dipeptidyl aminopeptidases/acylaminoacyl-peptidases	1e-60	[E] Amino acid transport and metabolism	pfam00326; pfam00930; pfam00930	Peptidase_S9; DPPIV_N; DPPIV_N	9.5e-48; 2.7e-23; 1.4e-04										CE10	CE10
2062037351	sg4i_00635990	contig18193	Gemmatimonadetes	86892..89138(-)	Dipeptidyl aminopeptidases/acylaminoacyl-peptidases	2247bp	748aa	0.7	Yes	Yes	COG1506	Dipeptidyl aminopeptidases/acylaminoacyl-peptidases	1e-56	[E] Amino acid transport and metabolism	pfam00326; pfam00930; pfam07676; pfam07676	Peptidase_S9; DPPIV_N; PD40; PD40	2.5e-22; 2.5e-10; 2.1e-10; 7.9e-05										CE10	CE10
2061987797	sg4i_00140450	contig18270	Gemmatimonadetes	5017..7140(+)	Dipeptidyl aminopeptidases/acylaminoacyl-peptidases	2124bp	707aa	0.71	Yes		COG1506	Dipeptidyl aminopeptidases/acylaminoacyl-peptidases	9e-95	[E] Amino acid transport and metabolism	pfam00326; pfam07676; pfam07676; pfam07676	Peptidase_S9; PD40; PD40; PD40	2.6e-49; 6.0e-11; 9.2e-09; 5.5e-03										CE10	CE10	3.4.19.1
2062009858	sg4i_00361060	contig04059	Gemmatimonadetes	72357..74666(-)	Dipeptidyl aminopeptidases/acylaminoacyl-peptidases	2310bp	769aa	0.7	Yes		COG1506	Dipeptidyl aminopeptidases/acylaminoacyl-peptidases	4e-78	[E] Amino acid transport and metabolism	pfam00326; pfam07676; pfam07676; pfam07676; pfam07676	Peptidase_S9; PD40; PD40; PD40; PD40	5.1e-48; 6.3e-08; 5.5e-05; 8.6e-02; 1.1e-01										CE10	CE10	3.4.19.1
2062034160	sg4i_00604080	contig00149	Gemmatimonadetes	17158..20049(+)	Dipeptidyl aminopeptidases/acylaminoacyl-peptidases	2892bp	963aa	0.7	Yes		COG1506	Dipeptidyl aminopeptidases/acylaminoacyl-peptidases	2e-40	[E] Amino acid transport and metabolism	pfam00326	Peptidase_S9	7.7e-27										CE10	CE10	3.4.19.1
2062021020	sg4i_00472680	contig14222	Gemmatimonadetes	33282..35198(+)	Dipeptidyl aminopeptidases/acylaminoacyl-peptidases	1917bp	638aa	0.68	Yes		COG1506	Dipeptidyl aminopeptidases/acylaminoacyl-peptidases	6e-74	[E] Amino acid transport and metabolism	pfam00326; pfam02897	Peptidase_S9; Peptidase_S9_N	1.1e-47; 2.1e-13										CE10, PL22	CE10
2061977392	sg4i_00036400	contig00248	Gemmatimonadetes	118556..119842(-)	UDP-3-0-acyl N-acetylglucosamine deacetylase/beta-hydroxyacyl-[acyl carrier protein] dehydratase FabZ	1287bp	428aa	0.68			COG0774	UDP-3-O-acyl-N-acetylglucosamine deacetylase	1e-77	[M] Cell wall/membrane/envelope biogenesis	pfam03331; pfam07977	LpxC; FabA	4.1e-78; 3.6e-40	KO:K02535	UDP-3-O-[3-hydroxymyristoyl] N-acetylglucosamine deacetylase [EC:3.5.1.-]	6e-130	M00114: Lipopolysaccharide biosynthesis, KDO2-lipid A	TIGR00325; TIGR01750	UDP-3-0-acyl N-acetylglucosamine deacetylase; beta-hydroxyacyl-[acyl carrier protein] dehydratase FabZ	1.2e-71; 4.1e-85	3.5.1.-	Hydrolases. Acting on carbon-nitrogen bonds, other than peptide bonds. In linear amides.	CE11	CE11	3.5.1.-
2061987710	sg4i_00139580	contig00331	Gemmatimonadetes	83042..83701(-)	Uncharacterized proteins, LmbE homologs	660bp	219aa	0.68			COG2120	Uncharacterized proteins, LmbE homologs	2e-20	[S] Function unknown	pfam02585	PIG-L	5.3e-14										CE14
2061998953	sg4i_00252010	contig11265	Gemmatimonadetes	168033..170027(-)	glucosamine-6-phosphate isomerase	1995bp	664aa	0.67			COG0363	6-phosphogluconolactonase/Glucosamine-6-phosphate isomerase/deaminase	4e-51	[G] Carbohydrate transport and metabolism	pfam01182; pfam02585	Glucosamine_iso; PIG-L	3.8e-65; 1.7e-24	KO:K02564	glucosamine-6-phosphate deaminase [EC:3.5.99.6]			TIGR00502	glucosamine-6-phosphate isomerase	1.3e-98	3.5.99.6	Glucosamine-6-phosphate deaminase.	CE14
2061986199	sg4i_00124470	contig05372	Gemmatimonadetes	8437..11208(-)	Uncharacterized proteins, LmbE homologs	2772bp	923aa	0.74	Yes		COG2120	Uncharacterized proteins, LmbE homologs	1e-12	[S] Function unknown	pfam02585; pfam10633; pfam10633	PIG-L; NPCBM_assoc; NPCBM_assoc	1.1e-14; 2.6e-08; 5.3e-05										CE14	CE14
2062003479	sg4i_00297270	contig00057	Gemmatimonadetes	27764..28489(-)	Uncharacterized proteins, LmbE homologs	726bp	241aa	0.73			COG2120	Uncharacterized proteins, LmbE homologs	2e-26	[S] Function unknown	pfam02585	PIG-L	6.3e-26										CE14	CE14
2062012876	sg4i_00391240	contig00068	Gemmatimonadetes	47859..48626(+)	hypothetical protein	768bp	255aa	0.69																			CE2
2062009859	sg4i_00361070	contig04059	Gemmatimonadetes	75143..76243(-)	Lysophospholipase L1 and related esterases	1101bp	366aa	0.74			COG2755	Lysophospholipase L1 and related esterases	4e-20	[E] Amino acid transport and metabolism	pfam00657	Lipase_GDSL	2.4e-11										CE3
2061987639	sg4i_00138870	contig00331	Gemmatimonadetes	4788..5702(+)	Predicted xylanase/chitin deacetylase	915bp	304aa	0.7	Yes		COG0726	Predicted xylanase/chitin deacetylase	5e-08	[G] Carbohydrate transport and metabolism	pfam01522	Polysacc_deac_1	1.2e-20										CE4
2062019359	sg4i_00456070	contig04681	Gemmatimonadetes	16263..16721(-)	Polysaccharide deacetylase.	459bp	152aa	0.72							pfam01522	Polysacc_deac_1	8.4e-07										CE4
2062012864	sg4i_00391120	contig00068	Gemmatimonadetes	30034..30903(-)	polysaccharide deactylase family protein, PEP-CTERM locus subfamily	870bp	289aa	0.69			COG0726	Predicted xylanase/chitin deacetylase	5e-18	[G] Carbohydrate transport and metabolism	pfam01522; pfam11959	Polysacc_deac_1; DUF3473	4.8e-23; 1.1e-38					TIGR03006	polysaccharide deactylase family protein, PEP-CTERM locus subfamily				CE4	CE4
2061977694	sg4i_00039420	contig18211	Gemmatimonadetes	62243..63598(-)	beta-galactosidase	1356bp	451aa	0.71			COG2723	Beta-glucosidase/6-phospho-beta-glucosidase/beta-galactosidase	8e-129	[G] Carbohydrate transport and metabolism	pfam00232	Glyco_hydro_1		KO:K05350	beta-glucosidase [EC:3.2.1.21]			TIGR03356	beta-galactosidase		3.2.1.21	Beta-glucosidase.	GH1	GH1	3.2.1.21
2061977390	sg4i_00036380	contig00248	Gemmatimonadetes	116755..117744(-)	Predicted dehydrogenases and related proteins	990bp	329aa	0.72			COG0673	Predicted dehydrogenases and related proteins	1e-31	[R] General function prediction only	pfam01408; pfam02894	GFO_IDH_MocA; GFO_IDH_MocA_C	2.3e-28; 4.0e-05										GH109
2061985386	sg4i_00116340	contig13406	Gemmatimonadetes	1727..3880(+)	Predicted dehydrogenases and related proteins	2154bp	717aa	0.68			COG0673	Predicted dehydrogenases and related proteins	8e-44	[R] General function prediction only	pfam00107; pfam01408	ADH_zinc_N; GFO_IDH_MocA	1.1e-15; 6.1e-22										GH109
2061985909	sg4i_00121570	contig00319	Gemmatimonadetes	34043..35038(-)	Predicted dehydrogenases and related proteins	996bp	331aa	0.72			COG0673	Predicted dehydrogenases and related proteins	6e-37	[R] General function prediction only	pfam01408; pfam02894	GFO_IDH_MocA; GFO_IDH_MocA_C	4.8e-22; 2.0e-05	KO:K00010	myo-inositol 2-dehydrogenase [EC:1.1.1.18]	2e-31					1.1.1.18	Inositol 2-dehydrogenase.	GH109
2061987804	sg4i_00140520	contig18270	Gemmatimonadetes	15033..16337(+)	Predicted dehydrogenases and related proteins	1305bp	434aa	0.7	Yes		COG0673	Predicted dehydrogenases and related proteins	2e-33	[R] General function prediction only	pfam01408	GFO_IDH_MocA	5.2e-22					TIGR01409	Tat (twin-arginine translocation) pathway signal sequence	3.2e-06			GH109
2061991802	sg4i_00180500	contig00365	Gemmatimonadetes	6675..7643(-)	Predicted dehydrogenases and related proteins	969bp	322aa	0.73	Yes		COG0673	Predicted dehydrogenases and related proteins	2e-41	[R] General function prediction only	pfam01408	GFO_IDH_MocA	1.4e-21										GH109
2061998005	sg4i_00242530	contig00414	Gemmatimonadetes	32606..33727(-)	Predicted dehydrogenases and related proteins	1122bp	373aa	0.71			COG0673	Predicted dehydrogenases and related proteins	3e-55	[R] General function prediction only	pfam01408; pfam02894	GFO_IDH_MocA; GFO_IDH_MocA_C	1.2e-26; 1.4e-12										GH109
2062000717	sg4i_00269650	contig00054	Gemmatimonadetes	7908..8921(+)	Predicted dehydrogenases and related proteins	1014bp	337aa	0.69			COG0673	Predicted dehydrogenases and related proteins	1e-53	[R] General function prediction only	pfam01408; pfam02894	GFO_IDH_MocA; GFO_IDH_MocA_C	8.3e-29; 4.7e-09										GH109
2062035543	sg4i_00617910	contig16693	Gemmatimonadetes	4868..6088(+)	Predicted dehydrogenases and related proteins	1221bp	406aa	0.72	Yes	Yes	COG0673	Predicted dehydrogenases and related proteins	3e-33	[R] General function prediction only	pfam01408; pfam02894	GFO_IDH_MocA; GFO_IDH_MocA_C	1.3e-21; 3.6e-05										GH109
2061998016	sg4i_00242640	contig00414	Gemmatimonadetes	45638..46999(+)	Predicted dehydrogenases and related proteins	1362bp	454aa	0.71	Yes		COG0673	Predicted dehydrogenases and related proteins	6e-18	[R] General function prediction only	pfam01408	GFO_IDH_MocA	1.5e-17					TIGR01409	Tat (twin-arginine translocation) pathway signal sequence	3.2e-05			GH109	GH109	3.2.1.49
2061996746	sg4i_00229940	contig13604	Gemmatimonadetes	44171..46135(-)	alpha-1,4-glucan:alpha-1,4-glucan 6-glycosyltransferase	1965bp	654aa	0.67			COG0296	1,4-alpha-glucan branching enzyme		[G] Carbohydrate transport and metabolism	pfam00128; pfam02806; pfam02922	Alpha-amylase; Alpha-amylase_C; CBM_48	2.7e-10; 4.7e-23; 3.5e-18	KO:K00700	1,4-alpha-glucan branching enzyme [EC:2.4.1.18]			TIGR01515	alpha-1,4-glucan:alpha-1,4-glucan 6-glycosyltransferase		2.4.1.18	1,4-alpha-glucan branching enzyme.	GH13, CBM48	GH13,CBM48	2.4.1.18
2061995078	sg4i_00213260	contig00391	Gemmatimonadetes	48314..50242(+)	Uncharacterized conserved protein	1929bp	642aa	0.73			COG3538	Uncharacterized conserved protein	2e-06	[S] Function unknown	pfam06824	DUF1237	7.5e-13										GH15
2061975655	sg4i_00019030	contig18203	Gemmatimonadetes	24750..26558(+)	Glucoamylase and related glycosyl hydrolases	1809bp	602aa	0.7	Yes		COG3387	Glucoamylase and related glycosyl hydrolases	4e-81	[G] Carbohydrate transport and metabolism	pfam00723	Glyco_hydro_15	2.1e-44										GH15	GH15	3.2.1.3
2061998919	sg4i_00251670	contig11265	Gemmatimonadetes	123888..125762(+)	Glucoamylase and related glycosyl hydrolases	1875bp	624aa	0.68			COG3387	Glucoamylase and related glycosyl hydrolases	1e-103	[G] Carbohydrate transport and metabolism	pfam00723	Glyco_hydro_15	3e-53										GH15	GH15	3.2.1.3
2062000764	sg4i_00270120	contig00054	Gemmatimonadetes	55322..57352(+)	Glucoamylase and related glycosyl hydrolases	2031bp	676aa	0.68			COG3387	Glucoamylase and related glycosyl hydrolases	1e-102	[G] Carbohydrate transport and metabolism	pfam00723	Glyco_hydro_15	4.5e-14										GH15	GH15	3.2.1.3
2061989001	sg4i_00152490	contig00040	Gemmatimonadetes	47176..49491(+)	Glycosyltransferases, probably involved in cell wall biogenesis	2316bp	772aa	0.73		Yes	COG1215	Glycosyltransferases, probably involved in cell wall biogenesis	4e-32	[M] Cell wall/membrane/envelope biogenesis	pfam00535; pfam02836	Glycos_transf_2; Glyco_hydro_2_C	1.6e-34; 1.3e-07										GH2, GT2	GT2
2061980968	sg4i_00072160	contig00275	Gemmatimonadetes	57042..57944(+)	Soluble lytic murein transglycosylase and related regulatory proteins (some contain LysM/invasin domains)	903bp	300aa	0.75	Yes		COG0741	Soluble lytic murein transglycosylase and related regulatory proteins (some contain LysM/invasin domains)	6e-15	[M] Cell wall/membrane/envelope biogenesis	pfam01464	SLT	6.7e-23										GH23
2061992081	sg4i_00183290	contig00005	Gemmatimonadetes	13499..14272(+)	Soluble lytic murein transglycosylase and related regulatory proteins (some contain LysM/invasin domains)	774bp	257aa	0.72	Yes	Yes	COG0741	Soluble lytic murein transglycosylase and related regulatory proteins (some contain LysM/invasin domains)	4e-10	[M] Cell wall/membrane/envelope biogenesis	pfam01464	SLT	7.6e-17										GH23
2061998880	sg4i_00251280	contig11265	Gemmatimonadetes	84827..85591(+)	Soluble lytic murein transglycosylase and related regulatory proteins (some contain LysM/invasin domains)	765bp	254aa	0.71			COG0741	Soluble lytic murein transglycosylase and related regulatory proteins (some contain LysM/invasin domains)	1e-13	[M] Cell wall/membrane/envelope biogenesis	pfam01464	SLT	7.5e-20										GH23
2062002950	sg4i_00291980	contig00452	Gemmatimonadetes	49220..49876(+)	Soluble lytic murein transglycosylase and related regulatory proteins (some contain LysM/invasin domains)	657bp	218aa	0.72	Yes		COG0741	Soluble lytic murein transglycosylase and related regulatory proteins (some contain LysM/invasin domains)	2e-15	[M] Cell wall/membrane/envelope biogenesis	pfam01464	SLT	3.5e-22										GH23
2062002107	sg4i_00283550	contig00056	Gemmatimonadetes	60173..62548(-)	Soluble lytic murein transglycosylase and related regulatory proteins (some contain LysM/invasin domains)	2376bp	791aa	0.74	Yes	Yes	COG0741	Soluble lytic murein transglycosylase and related regulatory proteins (some contain LysM/invasin domains)	4e-19	[M] Cell wall/membrane/envelope biogenesis	pfam01464	SLT	1.5e-24					TIGR01435	glutamate--cysteine ligase/gamma-glutamylcysteine synthetase, Streptococcus agalactiae type	0.076			GH23	GH23
2061998882	sg4i_00251300	contig11265	Gemmatimonadetes	85950..87221(-)	FOG: LysM repeat	1272bp	423aa	0.73	Yes		COG1388	FOG: LysM repeat	1e-15	[M] Cell wall/membrane/envelope biogenesis	pfam01464; pfam01476; pfam01476	SLT; LysM; LysM	5.5e-24; 1.8e-13; 1.4e-12	KO:K08307	membrane-bound lytic murein transglycosylase D [EC:3.2.1.-]	1e-84					3.2.1.-	Hydrolases. Glycosylases. Glycosidases, i.e. enzymes hydrolyzing O- and S-glycosyl compounds.	GH23, CBM50	GH23
2062031182	sg4i_00574300	contig16403	Gemmatimonadetes	1..1311(+)	FOG: LysM repeat	1311bp	437aa	0.66			COG1388	FOG: LysM repeat	2e-14	[M] Cell wall/membrane/envelope biogenesis	pfam01464; pfam01476; pfam01476; pfam01476; pfam01476; pfam01476	SLT; LysM; LysM; LysM; LysM; LysM	7.2e-12; 1.9e-15; 1.2e-13; 1.4e-13; 2.2e-08; 5.4e-02										GH23, CBM50	GH23	3.2.1.-
2061979262	sg4i_00055100	contig00260	Gemmatimonadetes	29066..30526(+)	Beta-glucosidase-related glycosidases	1461bp	486aa	0.75			COG1472	Beta-glucosidase-related glycosidases	3e-57	[G] Carbohydrate transport and metabolism	pfam00933	Glyco_hydro_3	4.1e-51	KO:K05349	beta-glucosidase [EC:3.2.1.21]	1e-92					3.2.1.21	Beta-glucosidase.	GH3	GH3	3.2.1.52
2061998955	sg4i_00252030	contig11265	Gemmatimonadetes	171360..173183(-)	Beta-glucosidase-related glycosidases	1824bp	607aa	0.72	Yes		COG1472	Beta-glucosidase-related glycosidases	2e-73	[G] Carbohydrate transport and metabolism	pfam00933; pfam01915	Glyco_hydro_3; Glyco_hydro_3_C	1.3e-59; 1.3e-07	KO:K01207	beta-N-acetylhexosaminidase [EC:3.2.1.52]	3e-123					3.2.1.52	Beta-N-acetylhexosaminidase.	GH3	GH3	3.2.1.52
2062037400	sg4i_00636480	contig18193	Gemmatimonadetes	136748..138511(+)	Beta-glucosidase-related glycosidases	1764bp	587aa	0.72	Yes		COG1472	Beta-glucosidase-related glycosidases	4e-68	[G] Carbohydrate transport and metabolism	pfam00933; pfam01915	Glyco_hydro_3; Glyco_hydro_3_C	1.5e-57; 1.3e-05	KO:K01207	beta-N-acetylhexosaminidase [EC:3.2.1.52]	3e-107					3.2.1.52	Beta-N-acetylhexosaminidase.	GH3	GH3	3.2.1.52
2061975693	sg4i_00019410	contig18203	Gemmatimonadetes	70630..71934(-)	BNR/Asp-box repeat.	1305bp	434aa	0.77	Yes						pfam02012; pfam02012	BNR; BNR	1.0e+00; 1.5e+00										GH33
2061996740	sg4i_00229880	contig13604	Gemmatimonadetes	34208..36664(-)	Trehalose and maltose hydrolases (possible phosphorylases)	2457bp	818aa	0.69			COG1554	Trehalose and maltose hydrolases (possible phosphorylases)		[G] Carbohydrate transport and metabolism	pfam03632; pfam03633; pfam03636	Glyco_hydro_65m; Glyco_hydro_65C; Glyco_hydro_65N	2.1e-109; 1.9e-05; 6.7e-56	KO:K03731; KO:K01087	trehalose 6-phosphate phosphorylase [EC:2.4.1.216]; trehalose-phosphatase [EC:3.1.3.12]	0.0e+00; 0.0e+00					2.4.1.216; 3.1.3.12	Trehalose 6-phosphate phosphorylase.; Trehalose-phosphatase.	GH65	GH65	2.4.1.-
2061977792	sg4i_00040400	contig00251	Gemmatimonadetes	28346..30646(-)	Trehalose and maltose hydrolases (possible phosphorylases)	2301bp	766aa	0.74			COG1554	Trehalose and maltose hydrolases (possible phosphorylases)		[G] Carbohydrate transport and metabolism	pfam03632; pfam03636	Glyco_hydro_65m; Glyco_hydro_65N	5.7e-115; 1.7e-30										GH65	GH65	2.4.1.230
2061977693	sg4i_00039410	contig18211	Gemmatimonadetes	60749..62092(-)	BNR/Asp-box repeat.	1344bp	447aa	0.76							pfam02012; pfam02012; pfam02012; pfam02012; pfam02012	BNR; BNR; BNR; BNR; BNR	1.3e-01; 1.5e-01; 7.2e-01; 1.1e+00; 2.7e+00										GH74
2061997986	sg4i_00242340	contig00414	Gemmatimonadetes	12921..13985(-)	BNR/Asp-box repeat.	1065bp	354aa	0.73							pfam02012; pfam02012; pfam02012; pfam02012; pfam02012; pfam02012	BNR; BNR; BNR; BNR; BNR; BNR	7.5e-02; 9.4e-02; 1.8e-01; 2.0e-01; 3.6e-01; 4.8e+00										GH74
2062037396	sg4i_00636440	contig18193	Gemmatimonadetes	133666..134799(-)	Uncharacterized protein related to plant photosystem II stability/assembly factor	1134bp	377aa	0.74	Yes		COG4447	Uncharacterized protein related to plant photosystem II stability/assembly factor	4e-14	[R] General function prediction only	pfam02012; pfam02012; pfam02012; pfam02012; pfam02012; pfam02012	BNR; BNR; BNR; BNR; BNR; BNR	9.8e-02; 3.6e-01; 3.9e-01; 7.4e-01; 2.1e+00; 2.7e+00										GH74
2061982578	sg4i_00088260	contig00291	Gemmatimonadetes	40069..42396(+)	Glycogen debranching enzyme	2328bp	775aa	0.73	Yes		COG3408	Glycogen debranching enzyme	2e-63	[G] Carbohydrate transport and metabolism													GH78	GH0
2062003537	sg4i_00297850	contig00057	Gemmatimonadetes	87159..89390(+)	Glycogen debranching enzyme	2232bp	743aa	0.71			COG3408	Glycogen debranching enzyme	1e-98	[G] Carbohydrate transport and metabolism	pfam06202	GDE_C	2.9e-12										GH78	GH0
2061998812	sg4i_00250600	contig11265	Gemmatimonadetes	13187..15196(-)	glycogen debranching enzyme, archaeal type, putative	2010bp	669aa	0.75			COG3408	Glycogen debranching enzyme	6e-90	[G] Carbohydrate transport and metabolism	pfam06202; pfam12439	GDE_C; GDE_N	2.4e-117; 9.1e-64					TIGR01561	glycogen debranching enzyme, archaeal type, putative				GH78	GH13
2061991332	sg4i_00175800	contig00360	Gemmatimonadetes	2649..4610(+)	Glycosyl hydrolase family 9./N-terminal ig-like domain of cellulase.	1962bp	653aa	0.71	Yes						pfam00759; pfam02927	Glyco_hydro_9; CelD_N	1.9e-32; 2.4e-11										GH9
2061975668	sg4i_00019160	contig18203	Gemmatimonadetes	42953..46207(-)	Glycosyl hydrolase family 9.	3255bp	1084aa	0.71	Yes						pfam00759	Glyco_hydro_9	4.2e-18										GH9	GH9
2061984070	sg4i_00103180	contig00036	Gemmatimonadetes	22661..23872(-)	Asparaginase	1212bp	403aa	0.71	Yes		COG1446	Asparaginase	6e-43	[E] Amino acid transport and metabolism	pfam01112	Asparaginase_2	1.9e-58	KO:K01424; KO:K01444	L-asparaginase [EC:3.5.1.1]; N4-(beta-N-acetylglucosaminyl)-L-asparaginase [EC:3.5.1.26]	9.0e-80; 6.0e-66	M00046: Asparagine degradation, asparagine => aspartate +NH3	TIGR01409	Tat (twin-arginine translocation) pathway signal sequence	2e-06	3.5.1.1; 3.5.1.26	Asparaginase.; N(4)-(beta-N-acetylglucosaminyl)-L-asparaginase.	GT1
2061977336	sg4i_00035840	contig00248	Gemmatimonadetes	59999..61159(+)	UDP-N-Acetylglucosamine 2-epimerase (EC 5.1.3.14)	1161bp	386aa	0.74			COG0381	UDP-N-acetylglucosamine 2-epimerase	4e-118	[M] Cell wall/membrane/envelope biogenesis	pfam02350	Epimerase_2	6.4e-104	KO:K01791	UDP-N-acetylglucosamine 2-epimerase [EC:5.1.3.14]	3e-107	M00101: UDP-N-Acetylgalactosamine and UDP-N-acetylmannosamine biosynthesis; M00104: CMP-N-Acetylneuraminate biosynthesis (mammals), ManNAc => Neu5Ac-9P => CMP-Neu5Ac	TIGR00236	UDP-N-acetylglucosamine 2-epimerase		5.1.3.14	UDP-N-acetylglucosamine 2-epimerase.	GT19
2061977388	sg4i_00036360	contig00248	Gemmatimonadetes	115510..116649(-)	lipid-A-disaccharide synthase	1140bp	379aa	0.74			COG0763	Lipid A disaccharide synthetase	1e-94	[M] Cell wall/membrane/envelope biogenesis	pfam02684	LpxB	3.5e-94	KO:K00748	lipid-A-disaccharide synthase [EC:2.4.1.182]	2e-84	M00114: Lipopolysaccharide biosynthesis, KDO2-lipid A	TIGR00215	lipid-A-disaccharide synthase	1.4e-90	2.4.1.182	Lipid-A-disaccharide synthase.	GT19	GT19	2.4.1.182
2061982572	sg4i_00088200	contig00291	Gemmatimonadetes	32301..33335(+)	Glycosyltransferases, probably involved in cell wall biogenesis	1035bp	344aa	0.71		Yes	COG1215	Glycosyltransferases, probably involved in cell wall biogenesis	5e-18	[M] Cell wall/membrane/envelope biogenesis	pfam00535	Glycos_transf_2	1.8e-25										GT2
2062002335	sg4i_00285830	contig00446	Gemmatimonadetes	3834..4745(+)	Glycosyl transferase family 2.	912bp	303aa	0.77							pfam00535	Glycos_transf_2	7.1e-10										GT2
2062021000	sg4i_00472480	contig14222	Gemmatimonadetes	6603..7790(-)	Glycosyltransferases involved in cell wall biogenesis	1188bp	395aa	0.74			COG0463	Glycosyltransferases involved in cell wall biogenesis	3e-14	[M] Cell wall/membrane/envelope biogenesis	pfam00535	Glycos_transf_2	1.1e-21										GT2
2061977335	sg4i_00035830	contig00248	Gemmatimonadetes	58909..59892(+)	Glycosyltransferases involved in cell wall biogenesis	984bp	327aa	0.68		Yes	COG0463	Glycosyltransferases involved in cell wall biogenesis	3e-18	[M] Cell wall/membrane/envelope biogenesis	pfam00535	Glycos_transf_2	1.1e-27	KO:K00721	dolichol-phosphate mannosyltransferase [EC:2.4.1.83]	2e-49					2.4.1.83	Dolichyl-phosphate beta-D-mannosyltransferase.	GT2	GT2
2061978210	sg4i_00044580	contig18214	Gemmatimonadetes	1100..2206(-)	Glycosyltransferases, probably involved in cell wall biogenesis	1107bp	368aa	0.78			COG1215	Glycosyltransferases, probably involved in cell wall biogenesis	6e-14	[M] Cell wall/membrane/envelope biogenesis	pfam00535	Glycos_transf_2	2.3e-23										GT2	GT2
2061982573	sg4i_00088210	contig00291	Gemmatimonadetes	33356..34495(+)	Predicted glycosyltransferases	1140bp	379aa	0.73	Yes		COG1216	Predicted glycosyltransferases	3e-20	[R] General function prediction only	pfam00535	Glycos_transf_2	2e-20										GT2	GT2
2061982576	sg4i_00088240	contig00291	Gemmatimonadetes	36150..37331(+)	Glycosyltransferases, probably involved in cell wall biogenesis	1182bp	393aa	0.71			COG1215	Glycosyltransferases, probably involved in cell wall biogenesis	5e-17	[M] Cell wall/membrane/envelope biogenesis	pfam00535	Glycos_transf_2	2.1e-23										GT2	GT2
2061982577	sg4i_00088250	contig00291	Gemmatimonadetes	37328..39904(+)	Glycosyltransferases, probably involved in cell wall biogenesis	2577bp	858aa	0.72		Yes	COG1215	Glycosyltransferases, probably involved in cell wall biogenesis	2e-23	[M] Cell wall/membrane/envelope biogenesis	pfam00535; pfam00535	Glycos_transf_2; Glycos_transf_2	6.7e-24; 5.9e-23										GT2	GT2
2061987708	sg4i_00139560	contig00331	Gemmatimonadetes	80332..81297(+)	Glycosyltransferases involved in cell wall biogenesis	966bp	321aa	0.66			COG0463	Glycosyltransferases involved in cell wall biogenesis	5e-18	[M] Cell wall/membrane/envelope biogenesis	pfam00535	Glycos_transf_2	6.9e-33										GT2	GT2
2061998466	sg4i_00247140	contig00418	Gemmatimonadetes	3293..4579(-)	Glycosyltransferases, probably involved in cell wall biogenesis	1287bp	428aa	0.74		Yes	COG1215	Glycosyltransferases, probably involved in cell wall biogenesis	6e-22	[M] Cell wall/membrane/envelope biogenesis	pfam00535	Glycos_transf_2	4.3e-23										GT2	GT2
2061998860	sg4i_00251080	contig11265	Gemmatimonadetes	59892..60725(-)	Glycosyltransferases involved in cell wall biogenesis	834bp	277aa	0.69			COG0463	Glycosyltransferases involved in cell wall biogenesis	6e-13	[M] Cell wall/membrane/envelope biogenesis	pfam00535	Glycos_transf_2	4.5e-21										GT2	GT2
2062002336	sg4i_00285840	contig00446	Gemmatimonadetes	4762..5595(-)	Glycosyltransferases involved in cell wall biogenesis	834bp	277aa	0.71			COG0463	Glycosyltransferases involved in cell wall biogenesis	6e-11	[M] Cell wall/membrane/envelope biogenesis	pfam00535	Glycos_transf_2	1.2e-14										GT2	GT2
2062012843	sg4i_00390910	contig00068	Gemmatimonadetes	3..389(-)	Glycosyltransferases involved in cell wall biogenesis	387bp	129aa	0.66			COG0463	Glycosyltransferases involved in cell wall biogenesis	2e-15	[M] Cell wall/membrane/envelope biogenesis	pfam00535	Glycos_transf_2	2.1e-23										GT2	GT2
2062012847	sg4i_00390950	contig00068	Gemmatimonadetes	7412..8854(+)	Glycosyltransferases, probably involved in cell wall biogenesis	1443bp	480aa	0.68		Yes	COG1215	Glycosyltransferases, probably involved in cell wall biogenesis	1e-26	[M] Cell wall/membrane/envelope biogenesis	pfam00535	Glycos_transf_2	2e-21										GT2	GT2
2062012861	sg4i_00391090	contig00068	Gemmatimonadetes	26674..27696(-)	Glycosyltransferases involved in cell wall biogenesis	1023bp	340aa	0.69		Yes	COG0463	Glycosyltransferases involved in cell wall biogenesis	2e-25	[M] Cell wall/membrane/envelope biogenesis	pfam00535	Glycos_transf_2	1e-34										GT2	GT2
2062024302	sg4i_00505500	contig00082	Gemmatimonadetes	69304..70125(-)	Glycosyltransferases involved in cell wall biogenesis	822bp	273aa	0.69			COG0463	Glycosyltransferases involved in cell wall biogenesis	3e-19	[M] Cell wall/membrane/envelope biogenesis	pfam00535	Glycos_transf_2	1.6e-32										GT2	GT2
2061977341	sg4i_00035890	contig00248	Gemmatimonadetes	66412..67149(+)	Glycosyltransferases involved in cell wall biogenesis	738bp	245aa	0.66			COG0463	Glycosyltransferases involved in cell wall biogenesis	4e-15	[M] Cell wall/membrane/envelope biogenesis	pfam00535	Glycos_transf_2	9.1e-30	KO:K00721	dolichol-phosphate mannosyltransferase [EC:2.4.1.83]	1e-99					2.4.1.83	Dolichyl-phosphate beta-D-mannosyltransferase.	GT2	GT2	2.4.1.-
2061987636	sg4i_00138840	contig00331	Gemmatimonadetes	487..1317(+)	Glycosyltransferases involved in cell wall biogenesis	831bp	276aa	0.66			COG0463	Glycosyltransferases involved in cell wall biogenesis	3e-17	[M] Cell wall/membrane/envelope biogenesis	pfam00535	Glycos_transf_2	1.6e-25										GT2	GT2	2.4.1.117
2061998864	sg4i_00251120	contig11265	Gemmatimonadetes	63312..64145(-)	Glycosyltransferases, probably involved in cell wall biogenesis	834bp	277aa	0.71			COG1215	Glycosyltransferases, probably involved in cell wall biogenesis	2e-09	[M] Cell wall/membrane/envelope biogenesis	pfam00535	Glycos_transf_2	3.6e-16										GT2, GT7	GT2
2061997864	sg4i_00241120	contig09023	Gemmatimonadetes	8795..10360(+)	Trehalose-6-phosphate synthase	1566bp	521aa	0.7			COG0380	Trehalose-6-phosphate synthase	2e-120	[G] Carbohydrate transport and metabolism	pfam00982	Glyco_transf_20	4.2e-129					TIGR02400	alpha,alpha-trehalose-phosphate synthase [UDP-forming]				GT20	GT20	2.4.1.15
2061996759	sg4i_00230070	contig13604	Gemmatimonadetes	60999..62135(+)	undecaprenyldiphospho-muramoylpentapeptide beta-N-acetylglucosaminyltransferase	1137bp	378aa	0.76	Yes		COG0707	UDP-N-acetylglucosamine:LPS N-acetylglucosamine transferase	9e-73	[M] Cell wall/membrane/envelope biogenesis	pfam03033; pfam04101	Glyco_transf_28; Glyco_tran_28_C	2.4e-26; 6.1e-33	KO:K02563	UDP-N-acetylglucosamine--N-acetylmuramyl-(pentapeptide) pyrophosphoryl-undecaprenol N-acetylglucosamine transferase [EC:2.4.1.227]	5e-87		TIGR01133	undecaprenyldiphospho-muramoylpentapeptide beta-N-acetylglucosaminyltransferase	2.3e-90	2.4.1.227	Undecaprenyldiphospho-muramoylpentapeptide beta-N- acetylglucosaminyltransferase.	GT28	GT28
2061978237	sg4i_00044850	contig18214	Gemmatimonadetes	30922..32358(-)	3-deoxy-D-manno-octulosonic-acid transferase	1437bp	478aa	0.78	Yes		COG1519	3-deoxy-D-manno-octulosonic-acid transferase	7e-58	[M] Cell wall/membrane/envelope biogenesis	pfam04413	Glycos_transf_N	6.5e-42	KO:K02527	3-deoxy-D-manno-octulosonic-acid transferase [EC:2.-.-.-]	1e-79	M00114: Lipopolysaccharide biosynthesis, KDO2-lipid A; M00156: Lipopolysaccharide biosynthesis, inner core => outer core => O-antigen				2.-	Transferases.	GT28, GT30
2061984071	sg4i_00103190	contig00036	Gemmatimonadetes	24406..26601(+)	alpha-glucan phosphorylases	2196bp	731aa	0.72			COG0058	Glucan phosphorylase		[G] Carbohydrate transport and metabolism	pfam00343	Phosphorylase	1.5e-12	KO:K00688	starch phosphorylase [EC:2.4.1.1]			TIGR02094	alpha-glucan phosphorylases		2.4.1.1	Phosphorylase.	GT35	GT35	2.4.1.1
2062024301	sg4i_00505490	contig00082	Gemmatimonadetes	67163..69301(-)	4-amino-4-deoxy-L-arabinose transferase and related glycosyltransferases of PMT family	2139bp	712aa	0.73	Yes	Yes	COG1807	4-amino-4-deoxy-L-arabinose transferase and related glycosyltransferases of PMT family	9e-07	[M] Cell wall/membrane/envelope biogenesis	pfam02366	PMT	8.7e-05										GT39
2061982571	sg4i_00088190	contig00291	Gemmatimonadetes	31079..32287(+)	Glycosyltransferase	1209bp	402aa	0.7	Yes		COG0438	Glycosyltransferase	3e-23	[M] Cell wall/membrane/envelope biogenesis	pfam00534	Glycos_transf_1	1e-17										GT4
2061985384	sg4i_00116320	contig13406	Gemmatimonadetes	4..513(+)	Glycosyltransferase	510bp	169aa	0.61			COG0438	Glycosyltransferase	1e-12	[M] Cell wall/membrane/envelope biogenesis	pfam00534	Glycos_transf_1	1.3e-14										GT4
2062012870	sg4i_00391180	contig00068	Gemmatimonadetes	38165..39403(-)	Glycosyltransferase	1239bp	412aa	0.68			COG0438	Glycosyltransferase	4e-25	[M] Cell wall/membrane/envelope biogenesis	pfam00534	Glycos_transf_1	5.5e-19										GT4
2061975591	sg4i_00018390	contig14904	Gemmatimonadetes	21205..22305(+)	Glycosyltransferase	1101bp	366aa	0.73			COG0438	Glycosyltransferase	2e-41	[M] Cell wall/membrane/envelope biogenesis	pfam00534	Glycos_transf_1	1.2e-40										GT4	GT4
2061983816	sg4i_00100640	contig18246	Gemmatimonadetes	4264..5577(-)	Glycosyltransferase	1314bp	437aa	0.73			COG0438	Glycosyltransferase	1e-27	[M] Cell wall/membrane/envelope biogenesis	pfam00534	Glycos_transf_1	8.5e-21										GT4	GT4
2061985385	sg4i_00116330	contig13406	Gemmatimonadetes	534..1694(+)	Glycosyltransferase	1161bp	386aa	0.62	Yes		COG0438	Glycosyltransferase	1e-24	[M] Cell wall/membrane/envelope biogenesis	pfam00534	Glycos_transf_1	7e-18										GT4	GT4
2061987638	sg4i_00138860	contig00331	Gemmatimonadetes	3421..4788(+)	Glycosyltransferase	1368bp	455aa	0.66			COG0438	Glycosyltransferase	6e-20	[M] Cell wall/membrane/envelope biogenesis	pfam00534	Glycos_transf_1	2.3e-05										GT4	GT4
2061987642	sg4i_00138900	contig00331	Gemmatimonadetes	8448..9569(+)	Glycosyltransferase	1122bp	373aa	0.71			COG0438	Glycosyltransferase	9e-33	[M] Cell wall/membrane/envelope biogenesis	pfam00534	Glycos_transf_1	3.8e-32										GT4	GT4
2061987643	sg4i_00138910	contig00331	Gemmatimonadetes	9622..10965(+)	Glycosyltransferase	1344bp	447aa	0.69			COG0438	Glycosyltransferase	8e-11	[M] Cell wall/membrane/envelope biogenesis	pfam00534	Glycos_transf_1	2.6e-07										GT4	GT4
2061995051	sg4i_00212990	contig00391	Gemmatimonadetes	19280..20416(+)	Glycosyltransferase	1137bp	378aa	0.7			COG0438	Glycosyltransferase	2e-39	[M] Cell wall/membrane/envelope biogenesis	pfam00534	Glycos_transf_1	1.2e-38										GT4	GT4
2061998934	sg4i_00251820	contig11265	Gemmatimonadetes	141192..142328(-)	Glycosyltransferase	1137bp	378aa	0.74			COG0438	Glycosyltransferase	6e-29	[M] Cell wall/membrane/envelope biogenesis	pfam00534	Glycos_transf_1	1.7e-16										GT4	GT4
2062003536	sg4i_00297840	contig00057	Gemmatimonadetes	86103..87137(+)	Glycosyltransferase	1035bp	344aa	0.71			COG0438	Glycosyltransferase	3e-25	[M] Cell wall/membrane/envelope biogenesis	pfam00534	Glycos_transf_1	1.9e-23										GT4	GT4
2062012856	sg4i_00391040	contig00068	Gemmatimonadetes	19599..20552(-)	Glycosyltransferase	954bp	317aa	0.73			COG0438	Glycosyltransferase	6e-29	[M] Cell wall/membrane/envelope biogenesis	pfam00534	Glycos_transf_1	1e-31										GT4	GT4
2062012859	sg4i_00391070	contig00068	Gemmatimonadetes	24442..25362(-)	Glycosyltransferase	921bp	306aa	0.65			COG0438	Glycosyltransferase	4e-21	[M] Cell wall/membrane/envelope biogenesis	pfam00534	Glycos_transf_1	4.4e-15										GT4	GT4
2062019361	sg4i_00456090	contig04681	Gemmatimonadetes	17142..18386(-)	Glycosyltransferase	1245bp	414aa	0.71	Yes		COG0438	Glycosyltransferase	8e-35	[M] Cell wall/membrane/envelope biogenesis	pfam00534	Glycos_transf_1	7.5e-40										GT4	GT4
2062034145	sg4i_00603930	contig00149	Gemmatimonadetes	172..1335(+)	Glycosyltransferase	1164bp	387aa	0.74			COG0438	Glycosyltransferase	2e-30	[M] Cell wall/membrane/envelope biogenesis	pfam00534	Glycos_transf_1	5.1e-34										GT4	GT4
2062034154	sg4i_00604020	contig00149	Gemmatimonadetes	10515..11261(+)	Glycosyltransferase	747bp	248aa	0.74			COG0438	Glycosyltransferase	9e-11	[M] Cell wall/membrane/envelope biogenesis	pfam00534	Glycos_transf_1	7.8e-14										GT4	GT4
2062034158	sg4i_00604060	contig00149	Gemmatimonadetes	14603..15961(+)	Glycosyltransferase	1359bp	452aa	0.75			COG0438	Glycosyltransferase	3e-22	[M] Cell wall/membrane/envelope biogenesis	pfam00534	Glycos_transf_1	4e-26										GT4	GT4
2062034159	sg4i_00604070	contig00149	Gemmatimonadetes	15961..17073(+)	Glycosyltransferase	1113bp	370aa	0.72			COG0438	Glycosyltransferase	6e-22	[M] Cell wall/membrane/envelope biogenesis	pfam00534	Glycos_transf_1	1.1e-25										GT4	GT4
2061977337	sg4i_00035850	contig00248	Gemmatimonadetes	61156..62265(+)	Glycosyltransferase	1110bp	369aa	0.73			COG0438	Glycosyltransferase	1e-41	[M] Cell wall/membrane/envelope biogenesis	pfam00534	Glycos_transf_1	6.8e-36	KO:K08256; KO:K00695	phosphatidylinositol alpha-mannosyltransferase [EC:2.4.1.57]; sucrose synthase [EC:2.4.1.13]	5.0e-34; 5.0e-34	M00116: Sucrose synthesis, UDP-glucose + fructose => sucrose				2.4.1.13; 2.4.1.57	Sucrose synthase.; Phosphatidylinositol alpha-mannosyltransferase.	GT4	GT4	2.4.1.-
2061978280	sg4i_00045280	contig18214	Gemmatimonadetes	55443..56498(-)	Glycosyltransferase	1056bp	351aa	0.7			COG0438	Glycosyltransferase	4e-24	[M] Cell wall/membrane/envelope biogenesis	pfam00534	Glycos_transf_1	4.7e-17	KO:K08256	phosphatidylinositol alpha-mannosyltransferase [EC:2.4.1.57]	3e-74					2.4.1.57	Phosphatidylinositol alpha-mannosyltransferase.	GT4	GT4	2.4.1.-
2061998863	sg4i_00251110	contig11265	Gemmatimonadetes	62144..63289(+)	Glycosyltransferase	1146bp	381aa	0.73			COG0438	Glycosyltransferase	1e-36	[M] Cell wall/membrane/envelope biogenesis	pfam00534	Glycos_transf_1	8.4e-39										GT4, GT94	GT4
2061995079	sg4i_00213270	contig00391	Gemmatimonadetes	50239..51645(+)	glycogen/starch synthases, ADP-glucose type	1407bp	468aa	0.72			COG0297	Glycogen synthase	1e-126	[G] Carbohydrate transport and metabolism	pfam00534; pfam08323	Glycos_transf_1; Glyco_transf_5	8.9e-18; 5.6e-67	KO:K00703	starch synthase [EC:2.4.1.21]	6e-105		TIGR02095	glycogen/starch synthases, ADP-glucose type		2.4.1.21	Starch synthase.	GT5	GT5	2.4.1.21
2061977049	sg4i_00032970	contig00242	Gemmatimonadetes	70788..72959(+)	penicillin-binding protein, 1A family	2172bp	723aa	0.73	Yes	Yes	COG0744	Membrane carboxypeptidase (penicillin-binding protein)		[M] Cell wall/membrane/envelope biogenesis	pfam00905; pfam00912	Transpeptidase; Transgly	4.8e-38; 2.2e-60	KO:K05366	penicillin-binding protein 1A [EC:2.4.1.- 3.4.-.-]			TIGR02074	penicillin-binding protein, 1A family		2.4.1.-; 3.4.-	Transferases. Glycosyltransferases. Hexosyltransferases.; Hydrolases. Acting on peptide bonds (peptide hydrolases).	GT51	GT51
2061980977	sg4i_00072250	contig00275	Gemmatimonadetes	65869..68235(-)	penicillin-binding protein, 1A family	2367bp	788aa	0.75	Yes	Yes	COG0744	Membrane carboxypeptidase (penicillin-binding protein)		[M] Cell wall/membrane/envelope biogenesis	pfam00905; pfam00912	Transpeptidase; Transgly	4.4e-40; 1.7e-62	KO:K05366	penicillin-binding protein 1A [EC:2.4.1.- 3.4.-.-]			TIGR02074	penicillin-binding protein, 1A family		2.4.1.-; 3.4.-	Transferases. Glycosyltransferases. Hexosyltransferases.; Hydrolases. Acting on peptide bonds (peptide hydrolases).	GT51	GT51
2061985904	sg4i_00121520	contig00319	Gemmatimonadetes	26124..28433(-)	penicillin-binding protein, 1A family	2310bp	769aa	0.73	Yes	Yes	COG0744	Membrane carboxypeptidase (penicillin-binding protein)		[M] Cell wall/membrane/envelope biogenesis	pfam00905; pfam00912	Transpeptidase; Transgly	9.7e-39; 9.7e-63	KO:K05366	penicillin-binding protein 1A [EC:2.4.1.- 3.4.-.-]			TIGR02074	penicillin-binding protein, 1A family		2.4.1.-; 3.4.-	Transferases. Glycosyltransferases. Hexosyltransferases.; Hydrolases. Acting on peptide bonds (peptide hydrolases).	GT51	GT51
2061993868	sg4i_00201160	contig00381	Gemmatimonadetes	2928..5006(-)	penicillin-binding protein, 1A family	2079bp	692aa	0.72	Yes	Yes	COG0744	Membrane carboxypeptidase (penicillin-binding protein)		[M] Cell wall/membrane/envelope biogenesis	pfam00905; pfam00912	Transpeptidase; Transgly	2.1e-39; 1.4e-56	KO:K05366	penicillin-binding protein 1A [EC:2.4.1.- 3.4.-.-]			TIGR02074	penicillin-binding protein, 1A family		2.4.1.-; 3.4.-	Transferases. Glycosyltransferases. Hexosyltransferases.; Hydrolases. Acting on peptide bonds (peptide hydrolases).	GT51	GT51
2062015116	sg4i_00413640	contig10080	Gemmatimonadetes	11538..12527(+)	monofunctional biosynthetic peptidoglycan transglycosylase	990bp	329aa	0.73	Yes	Yes	COG0744	Membrane carboxypeptidase (penicillin-binding protein)	3e-53	[M] Cell wall/membrane/envelope biogenesis	pfam00912; pfam00912	Transgly; Transgly	1.1e-41; 5.8e-10	KO:K03814	monofunctional biosynthetic peptidoglycan transglycosylase [EC:2.4.1.-]	5e-47		TIGR02070	monofunctional biosynthetic peptidoglycan transglycosylase	5.5e-67	2.4.1.-	Transferases. Glycosyltransferases. Hexosyltransferases.	GT51	GT51	2.4.-.-
2061988978	sg4i_00152260	contig00040	Gemmatimonadetes	7971..10394(-)	penicillin-binding protein 1C	2424bp	807aa	0.75	Yes	Yes	COG4953	Membrane carboxypeptidase/penicillin-binding protein PbpC		[M] Cell wall/membrane/envelope biogenesis	pfam00905; pfam00912; pfam06832	Transpeptidase; Transgly; BiPBP_C	2.2e-24; 7.4e-57; 1.3e-09	KO:K05366; KO:K05367	penicillin-binding protein 1A [EC:2.4.1.- 3.4.-.-]; penicillin-binding protein 1C [EC:2.4.1.-]	0.0e+00; 0.0e+00		TIGR02073	penicillin-binding protein 1C		2.4.1.-; 3.4.-	Transferases. Glycosyltransferases. Hexosyltransferases.; Hydrolases. Acting on peptide bonds (peptide hydrolases).	GT51	GT51	2.4.1.129
2061997866	sg4i_00241140	contig09023	Gemmatimonadetes	11710..13932(-)	penicillin-binding protein, 1A family	2223bp	740aa	0.71	Yes	Yes	COG0744	Membrane carboxypeptidase (penicillin-binding protein)		[M] Cell wall/membrane/envelope biogenesis	pfam00905; pfam00912	Transpeptidase; Transgly	3.2e-34; 2.8e-60	KO:K05366	penicillin-binding protein 1A [EC:2.4.1.- 3.4.-.-]			TIGR02074	penicillin-binding protein, 1A family		2.4.1.-; 3.4.-	Transferases. Glycosyltransferases. Hexosyltransferases.; Hydrolases. Acting on peptide bonds (peptide hydrolases).	GT51	GT51	2.4.1.129
2061979263	sg4i_00055110	contig00260	Gemmatimonadetes	30534..32231(+)	hypothetical protein	1698bp	565aa	0.72	Yes	Yes																	GT83
2062012844	sg4i_00390920	contig00068	Gemmatimonadetes	530..1921(-)	Predicted membrane protein	1392bp	463aa	0.67		Yes	COG5305	Predicted membrane protein	2e-13	[S] Function unknown													GT83
2062012857	sg4i_00391050	contig00068	Gemmatimonadetes	21123..22832(+)	hypothetical protein	1710bp	569aa	0.69	Yes	Yes	COG5305	Predicted membrane protein	3e-07	[S] Function unknown													GT83
2062024300	sg4i_00505480	contig00082	Gemmatimonadetes	65547..67166(-)	4-amino-4-deoxy-L-arabinose transferase and related glycosyltransferases of PMT family	1620bp	539aa	0.7	Yes	Yes	COG1807	4-amino-4-deoxy-L-arabinose transferase and related glycosyltransferases of PMT family	4e-07	[M] Cell wall/membrane/envelope biogenesis													GT83
2061983814	sg4i_00100620	contig18246	Gemmatimonadetes	1794..2891(-)	UDP-N-acetylglucosamine 2-epimerase	1098bp	365aa	0.69	Yes		COG0381	UDP-N-acetylglucosamine 2-epimerase	1e-80	[M] Cell wall/membrane/envelope biogenesis	pfam02350	Epimerase_2	1.8e-94	KO:K01791	UDP-N-acetylglucosamine 2-epimerase [EC:5.1.3.14]	4e-108	M00101: UDP-N-Acetylgalactosamine and UDP-N-acetylmannosamine biosynthesis; M00104: CMP-N-Acetylneuraminate biosynthesis (mammals), ManNAc => Neu5Ac-9P => CMP-Neu5Ac	TIGR00236	UDP-N-acetylglucosamine 2-epimerase	2.1e-92	5.1.3.14	UDP-N-acetylglucosamine 2-epimerase.	GT9
2062021006	sg4i_00472540	contig14222	Gemmatimonadetes	13696..14772(-)	ADP-heptose:LPS heptosyltransferase	1077bp	358aa	0.7			COG0859	ADP-heptose:LPS heptosyltransferase	8e-46	[M] Cell wall/membrane/envelope biogenesis	pfam01075	Glyco_transf_9	4.7e-43										GT9	GT9
2061985387	sg4i_00116350	contig13406	Gemmatimonadetes	3887..5665(+)	Uncharacterized protein conserved in bacteria	1779bp	592aa	0.72			COG5360	Uncharacterized protein conserved in bacteria	2e-23	[S] Function unknown	pfam07940	Hepar_II_III	5e-26										PL12	PL12
2062012846	sg4i_00390940	contig00068	Gemmatimonadetes	4016..7120(-)	Bacterial surface proteins containing Ig-like domains	3105bp	1034aa	0.68	Yes		COG5492	Bacterial surface proteins containing Ig-like domains	1e-10	[N] Cell motility	pfam02368; pfam02368; pfam02368; pfam02368; pfam02368	Big_2; Big_2; Big_2; Big_2; Big_2	2.0e-18; 3.8e-18; 1.4e-10; 1.0e-09; 3.5e-07										PL14
2061976993	sg4i_00032410	contig00242	Gemmatimonadetes	5941..7074(+)	Periplasmic component of the Tol biopolymer transport system	1134bp	377aa	0.67	Yes		COG0823	Periplasmic component of the Tol biopolymer transport system	5e-37	[U] Intracellular trafficking, secretion, and vesicular transport	pfam07676; pfam07676; pfam07676; pfam07676; pfam07676	PD40; PD40; PD40; PD40; PD40	7.1e-12; 1.1e-11; 4.4e-11; 4.2e-05; 6.6e-04										PL22
2061982584	sg4i_00088320	contig00291	Gemmatimonadetes	46820..47833(-)	40-residue YVTN family beta-propeller repeat	1014bp	337aa	0.69	Yes	Yes	COG3391	Uncharacterized conserved protein	1e-34	[S] Function unknown	pfam02239; pfam10282	Cytochrom_D1; Muc_lac_enz	4.3e-09; 4.9e-15					TIGR02276	40-residue YVTN family beta-propeller repeat	3.8e-104			PL22
2062013070	sg4i_00393180	contig15932	Gemmatimonadetes	17617..20862(-)	Uncharacterized protein related to the periplasmic component of the Tol biopolymer transport system	3246bp	1081aa	0.72	Yes		COG4946	Uncharacterized protein related to the periplasmic component of the Tol biopolymer transport system	1e-38	[S] Function unknown	pfam00595; pfam03572; pfam07676; pfam07676; pfam07676; pfam07676; pfam07676; pfam07676; pfam07676; pfam07676	PDZ; Peptidase_S41; PD40; PD40; PD40; PD40; PD40; PD40; PD40; PD40	7.9e-05; 4.9e-17; 1.7e-08; 9.5e-08; 4.9e-05; 5.0e-05; 2.4e-04; 8.2e-03; 4.9e-02; 1.3e-01										PL22
2062012893	sg4i_00391410	contig00068	Gemmatimonadetes	62936..64333(-)	dihydrolipoamide dehydrogenase	1398bp	465aa	0.7	Yes		COG1249	Pyruvate/2-oxoglutarate dehydrogenase complex, dihydrolipoamide dehydrogenase (E3) component, and related enzymes		[C] Energy production and conversion	pfam00070; pfam02852; pfam07992	Pyr_redox; Pyr_redox_dim; Pyr_redox_2	1.1e-20; 7.1e-38; 6.9e-47	KO:K00382	dihydrolipoamide dehydrogenase [EC:1.8.1.4]		M00009: Citrate cycle (TCA cycle, Krebs cycle); M00011: Citrate cycle, second carbon oxidation; M00058: Leucine degradation, leucine => acetoacetate + acetyl-CoA; M00059: Isoleucine degradation, isoleucine => propionyl-CoA; M00679: Pyruvate oxidation, pyruvate => acetyl-CoA	TIGR01350	dihydrolipoamide dehydrogenase		1.8.1.4	Dihydrolipoyl dehydrogenase.		LO3
2062021463	sg4i_00477110	contig01902	Hyphomicrobium	3488..4267(+)	conserved hypothetical protein TIGR00726	780bp	259aa	0.61			COG1496	Uncharacterized conserved protein	3e-67	[S] Function unknown	pfam02578	Cu-oxidase_4	1.3e-69	KO:K05810	conserved hypothetical protein	2e-78		TIGR00726	conserved hypothetical protein TIGR00726	1.1e-60						Laccase
2062019110	sg4i_00453580	contig16092	Hyphomicrobium	4501..10839(+)	Bacterial Ig-like domain (group 1)./Cellulose binding domain./Protein of unknown function (DUF1557).	6339bp	2112aa	0.47			COG1372	Intein/homing endonuclease	1e-06	[L] Replication, recombination and repair	pfam00942; pfam00942; pfam02369; pfam07591	CBM_3; CBM_3; Big_1; DUF1557	1.8e-24; 5.1e-18; 8.9e-09; 1.0e-33					TIGR01445	intein N-terminal splicing region	1e-14			CBM3	GH5,CBM3,GH44	3.2.1.4,3.2.1.78
2061999421	sg4i_00256690	contig00423	Hyphomicrobium	2027..5494(-)	Zinc metalloprotease (elastase)	3468bp	1155aa	0.6	Yes	Yes	COG3227	Zinc metalloprotease (elastase)	4e-82	[E] Amino acid transport and metabolism	pfam00801; pfam01447; pfam02868; pfam03413; pfam07504	PKD; Peptidase_M4; Peptidase_M4_C; PepSY; FTP	2.4e-16; 2.4e-26; 7.5e-45; 2.3e-05; 2.9e-14										CBM44
2061998278	sg4i_00245260	contig15508	Hyphomicrobium	4559..5167(+)	LysM domain.	609bp	203aa	0.62							pfam01476; pfam01476	LysM; LysM	5.6e-11; 2.8e-08										CBM50
2062013939	sg4i_00401870	contig00543	Hyphomicrobium	19096..19683(+)	LysM domain.	588bp	195aa	0.62							pfam01476	LysM	1.9e-14										CBM50
2062022558	sg4i_00488060	contig18523	Hyphomicrobium	8759..10363(-)	hypothetical protein	1605bp	534aa	0.59																			CBM9
2061982245	sg4i_00084930	contig18237	Hyphomicrobium	21304..22377(-)	Esterase PHB depolymerase.	1074bp	357aa	0.61	Yes						pfam10503	Esterase_phd	2.1e-06	KO:K05973	poly(3-hydroxybutyrate) depolymerase [EC:3.1.1.75]	3e-72					3.1.1.75	Poly(3-hydroxybutyrate) depolymerase.	CE1
2061989796	sg4i_00160440	contig15256	Hyphomicrobium	1603..2355(+)	Predicted hydrolases or acyltransferases (alpha/beta hydrolase superfamily)	753bp	250aa	0.63			COG0596	Predicted hydrolases or acyltransferases (alpha/beta hydrolase superfamily)	3e-16	[R] General function prediction only	pfam00561	Abhydrolase_1	3.3e-16										CE1
2061991250	sg4i_00174980	contig15299	Hyphomicrobium	2909..3835(-)	Predicted hydrolases or acyltransferases (alpha/beta hydrolase superfamily)	927bp	308aa	0.64	Yes		COG0596	Predicted hydrolases or acyltransferases (alpha/beta hydrolase superfamily)	5e-20	[R] General function prediction only	pfam00561	Abhydrolase_1	1.3e-16	KO:K01561	haloacetate dehalogenase [EC:3.8.1.3]	7e-92					3.8.1.3	Haloacetate dehalogenase.	CE1
2062005450	sg4i_00316980	contig18392	Hyphomicrobium	1..894(-)	homoserine O-acetyltransferase (EC 2.3.1.31)	894bp	298aa	0.61			COG2021	Homoserine acetyltransferase	9e-104	[E] Amino acid transport and metabolism	pfam00561	Abhydrolase_1	1.8e-18	KO:K00641	homoserine O-acetyltransferase [EC:2.3.1.31]	9e-120	M00052: Methionine biosynthesis, intermediates, homoserine => O-acetylhomoserine => cystathionine; M00053: Methionine biosynthesis, intermediates, homoserine => O-acetylhomoserine => L-homocysteine	TIGR01392	homoserine O-acetyltransferase		2.3.1.31	Homoserine O-acetyltransferase.	CE1
2062015536	sg4i_00417840	contig00558	Hyphomicrobium	2726..3628(-)	Predicted hydrolases or acyltransferases (alpha/beta hydrolase superfamily)	903bp	300aa	0.64			COG0596	Predicted hydrolases or acyltransferases (alpha/beta hydrolase superfamily)	1e-19	[R] General function prediction only	pfam00561	Abhydrolase_1	5.2e-16										CE1
2062017267	sg4i_00435150	contig12908	Hyphomicrobium	3..998(+)	Homoserine acetyltransferase	996bp	331aa	0.64			COG2021	Homoserine acetyltransferase	2e-44	[E] Amino acid transport and metabolism	pfam00561	Abhydrolase_1	2e-14	KO:K00641	homoserine O-acetyltransferase [EC:2.3.1.31]		M00052: Methionine biosynthesis, intermediates, homoserine => O-acetylhomoserine => cystathionine; M00053: Methionine biosynthesis, intermediates, homoserine => O-acetylhomoserine => L-homocysteine				2.3.1.31	Homoserine O-acetyltransferase.	CE1
2062020958	sg4i_00472060	contig01219	Hyphomicrobium	468..1499(+)	Esterase/lipase	1032bp	343aa	0.59			COG1647	Esterase/lipase	7e-29	[R] General function prediction only				KO:K03928	carboxylesterase [EC:3.1.1.1]	7e-57					3.1.1.1	Carboxylesterase.	CE1
2062020959	sg4i_00472070	contig01219	Hyphomicrobium	1831..2700(+)	Esterase/lipase	870bp	289aa	0.63			COG1647	Esterase/lipase	2e-32	[R] General function prediction only	pfam00561	Abhydrolase_1	4.3e-08	KO:K03928	carboxylesterase [EC:3.1.1.1]	3e-71					3.1.1.1	Carboxylesterase.	CE1
2062022103	sg4i_00483510	contig01229	Hyphomicrobium	1335..2135(-)	Predicted hydrolases or acyltransferases (alpha/beta hydrolase superfamily)	801bp	266aa	0.62			COG0596	Predicted hydrolases or acyltransferases (alpha/beta hydrolase superfamily)	6e-24	[R] General function prediction only	pfam00561	Abhydrolase_1	4.4e-22	KO:K01055	3-oxoadipate enol-lactonase [EC:3.1.1.24]	2e-59		TIGR02427	3-oxoadipate enol-lactonase	1.3e-63	3.1.1.24	3-oxoadipate enol-lactonase.	CE1
2062026475	sg4i_00527230	contig14367	Hyphomicrobium	3064..3720(-)	Predicted esterase	657bp	218aa	0.63	Yes		COG0400	Predicted esterase	1e-26	[R] General function prediction only	pfam02230	Abhydrolase_2	9.7e-42										CE1
2061978770	sg4i_00050180	contig18716	Hyphomicrobium	5518..6315(-)	Predicted hydrolases or acyltransferases (alpha/beta hydrolase superfamily)	798bp	265aa	0.62			COG0596	Predicted hydrolases or acyltransferases (alpha/beta hydrolase superfamily)	8e-21	[R] General function prediction only	pfam00561	Abhydrolase_1	2.4e-20	KO:K09023	protein RutD	5e-59							CE10
2062006611	sg4i_00328590	contig18399	Hyphomicrobium	3897..4772(-)	Dienelactone hydrolase and related enzymes	876bp	291aa	0.6	Yes		COG0412	Dienelactone hydrolase and related enzymes	1e-56	[Q] Secondary metabolites biosynthesis, transport and catabolism	pfam01738	DLH	5.4e-69	KO:K01061	carboxymethylenebutenolidase [EC:3.1.1.45]	2e-122					3.1.1.45	Carboxymethylenebutenolidase.	CE10
2062017191	sg4i_00434390	contig18480	Hyphomicrobium	7831..8661(+)	Esterase/lipase	831bp	276aa	0.63			COG0657	Esterase/lipase	2e-19	[I] Lipid transport and metabolism	pfam07859	Abhydrolase_3	6.1e-16										CE10	CE10
2062001529	sg4i_00277770	contig18363	Hyphomicrobium	2321..3259(+)	UDP-3-O-[3-hydroxymyristoyl] N-acetylglucosamine deacetylase (EC 3.5.1.-)	939bp	312aa	0.6			COG0774	UDP-3-O-acyl-N-acetylglucosamine deacetylase	2e-104	[M] Cell wall/membrane/envelope biogenesis	pfam03331	LpxC	1.5e-89	KO:K02535	UDP-3-O-[3-hydroxymyristoyl] N-acetylglucosamine deacetylase [EC:3.5.1.-]	2e-87	M00114: Lipopolysaccharide biosynthesis, KDO2-lipid A	TIGR00325	UDP-3-0-acyl N-acetylglucosamine deacetylase	1.3e-96	3.5.1.-	Hydrolases. Acting on carbon-nitrogen bonds, other than peptide bonds. In linear amides.	CE11	CE11	3.5.1.-
2061992978	sg4i_00192260	contig18303	Hyphomicrobium	4513..5208(+)	Lysophospholipase L1 and related esterases	696bp	231aa	0.61	Yes	Yes	COG2755	Lysophospholipase L1 and related esterases	6e-24	[E] Amino acid transport and metabolism	pfam00657	Lipase_GDSL	9.5e-16	KO:K01045	arylesterase [EC:3.1.1.2]	1e-56					3.1.1.2	Arylesterase.	CE3
2062016362	sg4i_00426100	contig18475	Hyphomicrobium	6678..7166(+)	Lysophospholipase L1 and related esterases	489bp	162aa	0.61			COG2755	Lysophospholipase L1 and related esterases	3e-09	[E] Amino acid transport and metabolism	pfam00657	Lipase_GDSL	5.1e-10										CE3
2062030224	sg4i_00564720	contig18587	Hyphomicrobium	8097..9089(-)	Predicted xylanase/chitin deacetylase	993bp	330aa	0.62	Yes		COG0726	Predicted xylanase/chitin deacetylase	1e-27	[G] Carbohydrate transport and metabolism	pfam01522	Polysacc_deac_1	1e-28										CE4	CE4
2062013011	sg4i_00392590	contig01804	Hyphomicrobium	5124..5981(+)	Predicted xylanase/chitin deacetylase	858bp	285aa	0.6	Yes		COG0726	Predicted xylanase/chitin deacetylase	8e-29	[G] Carbohydrate transport and metabolism	pfam01522	Polysacc_deac_1	3.4e-30										CE4	CE4	3.1.1.-
2062004183	sg4i_00304310	contig11376	Hyphomicrobium	16687..17394(+)	Predicted xylanase/chitin deacetylase	708bp	235aa	0.59	Yes		COG0726	Predicted xylanase/chitin deacetylase	5e-24	[G] Carbohydrate transport and metabolism	pfam01522	Polysacc_deac_1	6.4e-12										CE4	CE4	3.5.1.41
2062036093	sg4i_00623410	contig14826	Hyphomicrobium	3..1058(-)	N-acetylglucosamine-6-phosphate deacetylase	1056bp	352aa	0.61			COG1820	N-acetylglucosamine-6-phosphate deacetylase	2e-93	[G] Carbohydrate transport and metabolism				KO:K01443	N-acetylglucosamine-6-phosphate deacetylase [EC:3.5.1.25]	1e-80		TIGR00221	N-acetylglucosamine-6-phosphate deacetylase	2e-66	3.5.1.25	N-acetylglucosamine-6-phosphate deacetylase.	CE9	CE9	3.5.1.25
2062005099	sg4i_00313470	contig18389	Hyphomicrobium	2471..3535(-)	Membrane-bound lytic murein transglycosylase	1065bp	354aa	0.59			COG2821	Membrane-bound lytic murein transglycosylase	5e-86	[M] Cell wall/membrane/envelope biogenesis	pfam03562; pfam06725	MltA; 3D	4.1e-54; 3.3e-24	KO:K08304	membrane-bound lytic murein transglycosylase A [EC:3.2.1.-]	8e-79					3.2.1.-	Hydrolases. Glycosylases. Glycosidases, i.e. enzymes hydrolyzing O- and S-glycosyl compounds.	GH102	GH102	3.2.1.-
2061996266	sg4i_00225140	contig18827	Hyphomicrobium	1238..2455(+)	lytic murein transglycosylase	1218bp	405aa	0.62	Yes	Yes	COG2951	Membrane-bound lytic murein transglycosylase B	2e-85	[M] Cell wall/membrane/envelope biogenesis	pfam01471	PG_binding_1	9.6e-12					TIGR02283	lytic murein transglycosylase				GH103	GH103
2062006607	sg4i_00328550	contig18399	Hyphomicrobium	1..741(-)	Membrane-bound lytic murein transglycosylase B	741bp	247aa	0.63	Yes	Yes	COG2951	Membrane-bound lytic murein transglycosylase B	1e-49	[M] Cell wall/membrane/envelope biogenesis								TIGR02283	lytic murein transglycosylase	9.1e-62			GH103	GH103
2062028977	sg4i_00552250	contig01988	Hyphomicrobium	4136..5374(-)	lytic murein transglycosylase	1239bp	412aa	0.59	Yes		COG2951	Membrane-bound lytic murein transglycosylase B	3e-87	[M] Cell wall/membrane/envelope biogenesis	pfam01471	PG_binding_1	1.1e-10	KO:K08305	membrane-bound lytic murein transglycosylase B [EC:3.2.1.-]	1e-103		TIGR02283	lytic murein transglycosylase		3.2.1.-	Hydrolases. Glycosylases. Glycosidases, i.e. enzymes hydrolyzing O- and S-glycosyl compounds.	GH103	GH103
2062028978	sg4i_00552260	contig01988	Hyphomicrobium	5383..6258(-)	Membrane-bound lytic murein transglycosylase B	876bp	291aa	0.6			COG2951	Membrane-bound lytic murein transglycosylase B	3e-60	[M] Cell wall/membrane/envelope biogenesis	pfam01471	PG_binding_1	4.7e-10					TIGR02283	lytic murein transglycosylase	5.6e-68			GH103	GH103
2062000262	sg4i_00265100	contig18355	Hyphomicrobium	9008..9817(-)	Putative secretion activating protein	810bp	269aa	0.56		Yes	COG3926	Putative secretion activating protein	2e-36	[R] General function prediction only	pfam05838; pfam09374	DUF847; PG_binding_3	4.8e-19; 2.0e-18										GH108	GH108
2062010965	sg4i_00372130	contig11519	Hyphomicrobium	1189..2145(+)	Predicted homoserine dehydrogenase	957bp	318aa	0.67			COG4091	Predicted homoserine dehydrogenase	7e-45	[E] Amino acid transport and metabolism	pfam03447	NAD_binding_3	0.00011										GH109
2062021729	sg4i_00479770	contig19516	Hyphomicrobium	382..1416(-)	Predicted dehydrogenases and related proteins	1035bp	344aa	0.52	Yes		COG0673	Predicted dehydrogenases and related proteins	3e-57	[R] General function prediction only	pfam01408; pfam02894	GFO_IDH_MocA; GFO_IDH_MocA_C	1.9e-28; 2.0e-10										GH109
2062022524	sg4i_00487720	contig01912	Hyphomicrobium	5622..6980(+)	Predicted homoserine dehydrogenase	1359bp	452aa	0.62			COG4091	Predicted homoserine dehydrogenase	7e-108	[E] Amino acid transport and metabolism	pfam03447; pfam08666	NAD_binding_3; SAF	1.3e-08; 1.6e-07										GH109
2061994678	sg4i_00209260	contig18316	Hyphomicrobium	10273..11883(+)	Phytoene dehydrogenase and related proteins	1611bp	536aa	0.63			COG1233	Phytoene dehydrogenase and related proteins	4e-82	[Q] Secondary metabolites biosynthesis, transport and catabolism	pfam01593	Amino_oxidase	1.1e-09										GH11
2061994101	sg4i_00203490	contig18311	Hyphomicrobium	11427..13220(+)	Glucoamylase and related glycosyl hydrolases	1794bp	597aa	0.6			COG3387	Glucoamylase and related glycosyl hydrolases	1e-71	[G] Carbohydrate transport and metabolism	pfam00723	Glyco_hydro_15	2e-29										GH15	GH15	3.2.1.3
2061998075	sg4i_00243230	contig18339	Hyphomicrobium	11977..15372(-)	Glycosyltransferases, probably involved in cell wall biogenesis	3396bp	1131aa	0.6	Yes	Yes	COG1215	Glycosyltransferases, probably involved in cell wall biogenesis	3e-52	[M] Cell wall/membrane/envelope biogenesis	pfam00535; pfam00704; pfam01522	Glycos_transf_2; Glyco_hydro_18; Polysacc_deac_1	8.8e-35; 1.9e-07; 9.5e-32										GH18, CE4, GT2	GH18,CE4,GT2	3.5.1.-
2062002856	sg4i_00291040	contig19373	Hyphomicrobium	2141..3481(-)	Predicted chitinase	1341bp	446aa	0.6		Yes	COG3179	Predicted chitinase	9e-13	[R] General function prediction only	pfam00182; pfam01471	Glyco_hydro_19; PG_binding_1	4.1e-08; 5.5e-17										GH19
2061992000	sg4i_00182480	contig18297	Hyphomicrobium	4979..9031(+)	Soluble lytic murein transglycosylase and related regulatory proteins (some contain LysM/invasin domains)	4053bp	1350aa	0.57		Yes	COG0741	Soluble lytic murein transglycosylase and related regulatory proteins (some contain LysM/invasin domains)	2e-12	[M] Cell wall/membrane/envelope biogenesis	pfam01464; pfam05257	SLT; CHAP	3.1e-17; 1.3e-07										GH23
2062032686	sg4i_00589340	contig18604	Hyphomicrobium	5849..6607(+)	hypothetical protein	759bp	252aa	0.59	Yes																		GH23
2062010066	sg4i_00363140	contig00508	Hyphomicrobium	1750..3396(-)	Membrane-bound metallopeptidase	1647bp	548aa	0.59	Yes	Yes	COG4942	Membrane-bound metallopeptidase	4e-23	[D] Cell cycle control, cell division, chromosome partitioning	pfam01464; pfam01551	SLT; Peptidase_M23	6.4e-07; 7.7e-25										GH23	GH23
2062013012	sg4i_00392600	contig01804	Hyphomicrobium	5975..6634(-)	hypothetical protein	660bp	219aa	0.6																			GH23	GH23
2062026667	sg4i_00529150	contig01959	Hyphomicrobium	1598..3793(+)	Soluble lytic murein transglycosylase and related regulatory proteins (some contain LysM/invasin domains)	2196bp	731aa	0.63	Yes	Yes	COG0741	Soluble lytic murein transglycosylase and related regulatory proteins (some contain LysM/invasin domains)	8e-19	[M] Cell wall/membrane/envelope biogenesis	pfam01464	SLT	3.9e-18	KO:K08309	soluble lytic murein transglycosylase [EC:3.2.1.-]	2e-99					3.2.1.-	Hydrolases. Glycosylases. Glycosidases, i.e. enzymes hydrolyzing O- and S-glycosyl compounds.	GH23	GH23
2062033443	sg4i_00596910	contig18663	Hyphomicrobium	7576..7809(-)	Uncharacterized conserved protein	234bp	77aa	0.64	Yes		COG5465	Uncharacterized conserved protein	2e-20	[S] Function unknown	pfam08749	DUF1790	6.3e-27										GH24
2061995573	sg4i_00218210	contig18821	Hyphomicrobium	1399..2742(-)	hypothetical protein	1344bp	447aa	0.57	Yes																		GH39
2062021587	sg4i_00478350	contig06806	Hyphomicrobium	3167..5269(+)	Trehalose and maltose hydrolases (possible phosphorylases)	2103bp	700aa	0.59			COG1554	Trehalose and maltose hydrolases (possible phosphorylases)		[G] Carbohydrate transport and metabolism	pfam03632; pfam03633; pfam03636	Glyco_hydro_65m; Glyco_hydro_65C; Glyco_hydro_65N	2.2e-123; 1.9e-04; 6.8e-25										GH65	GH65	2.4.1.230
2062006695	sg4i_00329430	contig11423	Hyphomicrobium	959..1639(-)	Muramidase (flagellum-specific)	681bp	226aa	0.63	Yes		COG1705	Muramidase (flagellum-specific)	2e-28	[N] Cell motility; [U] Intracellular trafficking, secretion, and vesicular transport	pfam01832	Glucosaminidase	1e-23										GH73
2062024590	sg4i_00508380	contig01254	Hyphomicrobium	7315..8304(-)	Mannosyl-glycoprotein endo-beta-N-acetylglucosaminidase.	990bp	329aa	0.62	Yes						pfam01832	Glucosaminidase	0.00025										GH73
2062024591	sg4i_00508390	contig01254	Hyphomicrobium	8395..9534(-)	Mannosyl-glycoprotein endo-beta-N-acetylglucosaminidase.	1140bp	379aa	0.63	Yes						pfam01832	Glucosaminidase	6.1e-06										GH73
2062022520	sg4i_00487680	contig01912	Hyphomicrobium	2195..2842(-)	BNR/Asp-box repeat.	648bp	215aa	0.59	Yes						pfam02012; pfam02012; pfam02012; pfam02012	BNR; BNR; BNR; BNR	1.6e-01; 3.2e-01; 1.0e+00; 2.4e+01										GH74
2062022521	sg4i_00487690	contig01912	Hyphomicrobium	2814..3317(-)	hypothetical protein	504bp	167aa	0.61																			GH74
2061980575	sg4i_00068230	contig18227	Hyphomicrobium	7382..9571(-)	Glycogen debranching enzyme	2190bp	729aa	0.58			COG3408	Glycogen debranching enzyme	4e-106	[G] Carbohydrate transport and metabolism	pfam06202	GDE_C	1.4e-11										GH78	GH0
2062012905	sg4i_00391530	contig02072	Hyphomicrobium	71..2116(-)	Highly conserved protein containing a thioredoxin domain	2046bp	681aa	0.61			COG1331	Highly conserved protein containing a thioredoxin domain		[O] Posttranslational modification, protein turnover, chaperones	pfam03190; pfam03663	DUF255; Glyco_hydro_76	2.3e-73; 6.1e-06										GH9
2062020041	sg4i_00462890	contig19002	Hyphomicrobium	111..2561(+)	Cellobiose phosphorylase	2451bp	816aa	0.6			COG3459	Cellobiose phosphorylase		[G] Carbohydrate transport and metabolism	pfam06165; pfam06204; pfam06205	Glyco_transf_36; CBM_X; GT36_AF	5.5e-25; 2.1e-20; 1.5e-20										GH94	GT84,GH94	2.4.1.-
2062035079	sg4i_00613270	contig01430	Hyphomicrobium	5206..6438(-)	hypothetical protein	1233bp	410aa	0.49			COG3754	Lipopolysaccharide biosynthesis protein	9e-28	[M] Cell wall/membrane/envelope biogenesis													GH99	GT4
2061978675	sg4i_00049230	contig01485	Hyphomicrobium	5372..7759(+)	Lipopolysaccharide biosynthesis protein	2388bp	796aa	0.53	Yes		COG3754	Lipopolysaccharide biosynthesis protein	7e-30	[M] Cell wall/membrane/envelope biogenesis	pfam00534	Glycos_transf_1	2.4e-27										GH99, GT4	GT2,GT4
2061980253	sg4i_00065010	contig18225	Hyphomicrobium	38843..40072(-)	UDP-N-Acetylglucosamine 2-epimerase (EC 5.1.3.14)	1230bp	409aa	0.56			COG0381	UDP-N-acetylglucosamine 2-epimerase	3e-98	[M] Cell wall/membrane/envelope biogenesis	pfam02350	Epimerase_2	1.6e-104	KO:K01791	UDP-N-acetylglucosamine 2-epimerase [EC:5.1.3.14]	4e-93	M00101: UDP-N-Acetylgalactosamine and UDP-N-acetylmannosamine biosynthesis; M00104: CMP-N-Acetylneuraminate biosynthesis (mammals), ManNAc => Neu5Ac-9P => CMP-Neu5Ac	TIGR00236	UDP-N-acetylglucosamine 2-epimerase	2.9e-107	5.1.3.14	UDP-N-acetylglucosamine 2-epimerase.	GT19
2062008145	sg4i_00343930	contig18410	Hyphomicrobium	3662..4840(-)	lipid-A-disaccharide synthase	1179bp	392aa	0.63			COG0763	Lipid A disaccharide synthetase	2e-102	[M] Cell wall/membrane/envelope biogenesis	pfam02684	LpxB	9e-84	KO:K00748	lipid-A-disaccharide synthase [EC:2.4.1.182]	1e-109	M00114: Lipopolysaccharide biosynthesis, KDO2-lipid A	TIGR00215	lipid-A-disaccharide synthase	1.8e-68	2.4.1.182	Lipid-A-disaccharide synthase.	GT19	GT19	2.4.1.182
2061996594	sg4i_00228420	contig18329	Hyphomicrobium	13639..14079(+)	Glycosyl transferase family 2.	441bp	146aa	0.49							pfam00535	Glycos_transf_2	1.6e-14										GT2
2062011630	sg4i_00378780	contig12837	Hyphomicrobium	4274..5215(-)	Glycosyltransferases involved in cell wall biogenesis	942bp	313aa	0.52			COG0463	Glycosyltransferases involved in cell wall biogenesis	7e-08	[M] Cell wall/membrane/envelope biogenesis	pfam00535	Glycos_transf_2	3.3e-07										GT2
2062033951	sg4i_00601990	contig02036	Hyphomicrobium	20395..20808(-)	Predicted glycosyltransferases	414bp	137aa	0.57	Yes		COG1216	Predicted glycosyltransferases	2e-16	[R] General function prediction only	pfam00535	Glycos_transf_2	4.4e-20										GT2
2061988609	sg4i_00148570	contig18275	Hyphomicrobium	16534..17625(+)	hypothetical protein	1092bp	363aa	0.48																			GT2	GT0
2061984835	sg4i_00110830	contig18252	Hyphomicrobium	2..586(+)	Glycosyl transferase family 2.	585bp	194aa	0.61							pfam00535	Glycos_transf_2	1.3e-07										GT2	GT2
2062022782	sg4i_00490300	contig20025	Hyphomicrobium	211..741(+)	Glycosyltransferases involved in cell wall biogenesis	531bp	176aa	0.53			COG0463	Glycosyltransferases involved in cell wall biogenesis	3e-10	[M] Cell wall/membrane/envelope biogenesis	pfam00535	Glycos_transf_2	6.5e-19										GT2	GT2
2062033956	sg4i_00602040	contig02036	Hyphomicrobium	23519..24637(-)	Glycosyltransferases, probably involved in cell wall biogenesis	1119bp	372aa	0.54			COG1215	Glycosyltransferases, probably involved in cell wall biogenesis	9e-18	[M] Cell wall/membrane/envelope biogenesis	pfam00535	Glycos_transf_2	6.8e-25										GT2	GT2
2062035075	sg4i_00613230	contig01430	Hyphomicrobium	2594..3457(-)	Predicted glycosyltransferases	864bp	287aa	0.52			COG1216	Predicted glycosyltransferases	4e-34	[R] General function prediction only	pfam00535	Glycos_transf_2	3.7e-22										GT2	GT2
2062035996	sg4i_00622440	contig14823	Hyphomicrobium	407..2212(-)	Glycosyltransferases, probably involved in cell wall biogenesis	1806bp	601aa	0.61		Yes	COG1215	Glycosyltransferases, probably involved in cell wall biogenesis	5e-40	[M] Cell wall/membrane/envelope biogenesis	pfam00535	Glycos_transf_2	5.2e-15										GT2	GT2
2061978839	sg4i_00050870	contig01486	Hyphomicrobium	14962..15843(+)	Predicted glycosyltransferases	882bp	293aa	0.64		Yes	COG1216	Predicted glycosyltransferases	8e-44	[R] General function prediction only	pfam00535	Glycos_transf_2	1.2e-31										GT2	GT2	2.4.1.-
2061980251	sg4i_00064990	contig18225	Hyphomicrobium	36700..37953(-)	Glycosyltransferases, probably involved in cell wall biogenesis	1254bp	417aa	0.57	Yes	Yes	COG1215	Glycosyltransferases, probably involved in cell wall biogenesis	5e-49	[M] Cell wall/membrane/envelope biogenesis	pfam00535	Glycos_transf_2	9e-29										GT2	GT2	2.4.1.-
2061988608	sg4i_00148560	contig18275	Hyphomicrobium	15729..16517(+)	Glycosyltransferases involved in cell wall biogenesis	789bp	262aa	0.55		Yes	COG0463	Glycosyltransferases involved in cell wall biogenesis	6e-08	[M] Cell wall/membrane/envelope biogenesis	pfam00535	Glycos_transf_2	1.1e-14										GT2	GT2	2.4.1.-
2061993421	sg4i_00196690	contig15368	Hyphomicrobium	399..2426(-)	Membrane glycosyltransferase	2028bp	675aa	0.62		Yes	COG2943	Membrane glycosyltransferase		[M] Cell wall/membrane/envelope biogenesis	pfam00535	Glycos_transf_2	1.2e-05	KO:K03669	membrane glycosyltransferase [EC:2.4.1.-]						2.4.1.-	Transferases. Glycosyltransferases. Hexosyltransferases.	GT2	GT2	2.4.1.-
2061994102	sg4i_00203500	contig18311	Hyphomicrobium	13199..14635(+)	trehalose 6-phosphate synthase (EC 2.4.1.15)	1437bp	478aa	0.6			COG0380	Trehalose-6-phosphate synthase		[G] Carbohydrate transport and metabolism	pfam00982	Glyco_transf_20		KO:K00697	alpha,alpha-trehalose-phosphate synthase (UDP-forming) [EC:2.4.1.15]			TIGR02400	alpha,alpha-trehalose-phosphate synthase [UDP-forming]		2.4.1.15	Alpha,alpha-trehalose-phosphate synthase (UDP-forming).	GT20	GT20	2.4.1.15
2061993319	sg4i_00195670	contig18306	Hyphomicrobium	10928..11815(-)	bacterial polymer biosynthesis proteins, WecB/TagA/CpsF family	888bp	295aa	0.66			COG1922	Teichoic acid biosynthesis proteins	2e-61	[M] Cell wall/membrane/envelope biogenesis	pfam03808	Glyco_tran_WecB	1.4e-62	KO:K02852; KO:K05946	UDP-N-acetyl-D-mannosaminuronic acid transferase [EC:2.4.1.-]; N-acetylglucosaminyldiphosphoundecaprenol [EC:2.4.1.187]	5.0e-88; 5.0e-88		TIGR00696	bacterial polymer biosynthesis proteins, WecB/TagA/CpsF family	8.6e-56	2.4.1.-; 2.4.1.187	Transferases. Glycosyltransferases. Hexosyltransferases.; N-acetylglucosaminyldiphosphoundecaprenol N-acetyl-beta-D- mannosaminyltransferase.	GT26	GT26
2061985779	sg4i_00120270	contig15118	Hyphomicrobium	11647..12045(+)	UDP-N-acetylglucosamine--N-acetylmuramyl-(pentapeptide) pyrophosphoryl-undecaprenol N-acetylglucosamine transferase (EC 2.4.1.227)	399bp	132aa	0.62	Yes		COG0707	UDP-N-acetylglucosamine:LPS N-acetylglucosamine transferase	1e-31	[M] Cell wall/membrane/envelope biogenesis	pfam04101	Glyco_tran_28_C	2.1e-26										GT28	GT28
2062008389	sg4i_00346370	contig18412	Hyphomicrobium	8147..10258(-)	3-deoxy-D-manno-octulosonic-acid transferase	2112bp	703aa	0.63			COG1519	3-deoxy-D-manno-octulosonic-acid transferase	1e-118	[M] Cell wall/membrane/envelope biogenesis	pfam04028; pfam04413	DUF374; Glycos_transf_N	1.7e-19; 1.2e-64	KO:K02527	3-deoxy-D-manno-octulosonic-acid transferase [EC:2.-.-.-]	2e-105	M00114: Lipopolysaccharide biosynthesis, KDO2-lipid A; M00156: Lipopolysaccharide biosynthesis, inner core => outer core => O-antigen				2.-	Transferases.	GT30	GT30	2.-.-.-
2061997504	sg4i_00237520	contig12665	Hyphomicrobium	543..1286(+)	Glycosyltransferase	744bp	247aa	0.6	Yes		COG0438	Glycosyltransferase	8e-30	[M] Cell wall/membrane/envelope biogenesis	pfam00534	Glycos_transf_1	2e-36										GT4
2062025108	sg4i_00513560	contig03411	Hyphomicrobium	1448..2707(-)	Glycosyltransferase	1260bp	419aa	0.65			COG0438	Glycosyltransferase	2e-27	[M] Cell wall/membrane/envelope biogenesis	pfam00534	Glycos_transf_1	1.1e-26										GT4
2062023299	sg4i_00495470	contig17715	Hyphomicrobium	1410..2699(+)	Glycosyltransferase	1290bp	429aa	0.65	Yes		COG0438	Glycosyltransferase	8e-16	[M] Cell wall/membrane/envelope biogenesis	pfam00534	Glycos_transf_1	4.1e-07										GT4	GT0
2061974161	sg4i_00004090	contig12309	Hyphomicrobium	3495..4163(-)	Glycosyltransferase	669bp	222aa	0.64			COG0438	Glycosyltransferase	1e-30	[M] Cell wall/membrane/envelope biogenesis	pfam00534	Glycos_transf_1	1.4e-45										GT4	GT4
2061980099	sg4i_00063470	contig18224	Hyphomicrobium	25027..26343(-)	Glycosyltransferase	1317bp	438aa	0.67			COG0438	Glycosyltransferase	2e-30	[M] Cell wall/membrane/envelope biogenesis	pfam00534	Glycos_transf_1	1.1e-26										GT4	GT4
2061986077	sg4i_00123250	contig18260	Hyphomicrobium	2778..3830(+)	Glycosyltransferase	1053bp	350aa	0.58			COG0438	Glycosyltransferase	2e-24	[M] Cell wall/membrane/envelope biogenesis	pfam00534	Glycos_transf_1	1.2e-22										GT4	GT4
2061993305	sg4i_00195530	contig18306	Hyphomicrobium	2..391(-)	Glycosyltransferase	390bp	130aa	0.68			COG0438	Glycosyltransferase	9e-21	[M] Cell wall/membrane/envelope biogenesis	pfam00534	Glycos_transf_1	1.8e-21										GT4	GT4
2061993316	sg4i_00195640	contig18306	Hyphomicrobium	7191..8429(-)	Glycosyltransferase	1239bp	412aa	0.63	Yes	Yes	COG0438	Glycosyltransferase	5e-32	[M] Cell wall/membrane/envelope biogenesis	pfam00534	Glycos_transf_1	1.3e-32										GT4	GT4
2061994667	sg4i_00209150	contig18316	Hyphomicrobium	1..1077(-)	Glycosyltransferase	1077bp	359aa	0.58			COG0438	Glycosyltransferase	5e-22	[M] Cell wall/membrane/envelope biogenesis	pfam00534	Glycos_transf_1	8.7e-14										GT4	GT4
2062000021	sg4i_00262690	contig18353	Hyphomicrobium	4727..5530(-)	Glycosyltransferase	804bp	267aa	0.6			COG0438	Glycosyltransferase	1e-22	[M] Cell wall/membrane/envelope biogenesis	pfam00534	Glycos_transf_1	4.7e-19										GT4	GT4
2062000026	sg4i_00262740	contig18353	Hyphomicrobium	8307..9716(-)	Glycosyltransferase	1410bp	469aa	0.51			COG0438	Glycosyltransferase	8e-16	[M] Cell wall/membrane/envelope biogenesis	pfam00534	Glycos_transf_1	5.2e-13										GT4	GT4
2062010533	sg4i_00367810	contig01775	Hyphomicrobium	5934..6308(-)	Glycosyltransferase	375bp	124aa	0.63			COG0438	Glycosyltransferase	4e-12	[M] Cell wall/membrane/envelope biogenesis	pfam00534	Glycos_transf_1	7.6e-13										GT4	GT4
2062012093	sg4i_00383410	contig12841	Hyphomicrobium	3035..3592(+)	Glycosyltransferase	558bp	185aa	0.62			COG0438	Glycosyltransferase	3e-18	[M] Cell wall/membrane/envelope biogenesis	pfam00534	Glycos_transf_1	1.8e-17										GT4	GT4
2062012097	sg4i_00383450	contig12841	Hyphomicrobium	6466..7632(-)	Glycosyltransferase	1167bp	388aa	0.63			COG0438	Glycosyltransferase	3e-19	[M] Cell wall/membrane/envelope biogenesis	pfam00534	Glycos_transf_1	4e-19										GT4	GT4
2062025107	sg4i_00513550	contig03411	Hyphomicrobium	286..1419(-)	Glycosyltransferase	1134bp	377aa	0.71			COG0438	Glycosyltransferase	1e-34	[M] Cell wall/membrane/envelope biogenesis	pfam00534	Glycos_transf_1	7.7e-35										GT4	GT4
2062025109	sg4i_00513570	contig03411	Hyphomicrobium	2712..3857(-)	Glycosyltransferase	1146bp	381aa	0.39			COG0438	Glycosyltransferase	3e-28	[M] Cell wall/membrane/envelope biogenesis	pfam00534	Glycos_transf_1	2.1e-37										GT4	GT4
2062025110	sg4i_00513580	contig03411	Hyphomicrobium	3866..4630(-)	Glycosyltransferase	765bp	254aa	0.66			COG0438	Glycosyltransferase	8e-29	[M] Cell wall/membrane/envelope biogenesis	pfam00534	Glycos_transf_1	3.1e-29										GT4	GT4
2062034218	sg4i_00604660	contig01418	Hyphomicrobium	1892..3088(+)	Glycosyltransferase	1197bp	399aa	0.6			COG0438	Glycosyltransferase	1e-27	[M] Cell wall/membrane/envelope biogenesis	pfam00534	Glycos_transf_1	8.8e-21										GT4	GT4
2061980576	sg4i_00068240	contig18227	Hyphomicrobium	9584..10777(-)	Glycosyltransferase	1194bp	397aa	0.58			COG0438	Glycosyltransferase	9e-31	[M] Cell wall/membrane/envelope biogenesis	pfam00534	Glycos_transf_1	5.8e-23										GT4	GT4	2.4.1.-
2061993311	sg4i_00195590	contig18306	Hyphomicrobium	2507..3325(-)	Glycosyltransferase	819bp	272aa	0.57			COG0438	Glycosyltransferase	6e-36	[M] Cell wall/membrane/envelope biogenesis	pfam00534	Glycos_transf_1	2.5e-38										GT4	GT4	2.4.1.-
2061978832	sg4i_00050800	contig01486	Hyphomicrobium	5450..8752(+)	Predicted glycosyltransferases	3303bp	1100aa	0.32			COG1216	Predicted glycosyltransferases	1e-38	[R] General function prediction only	pfam00534; pfam00535; pfam08241	Glycos_transf_1; Glycos_transf_2; Methyltransf_11	1.9e-09; 5.9e-28; 2.0e-20										GT4, GT27	GT2,GT4
2061982246	sg4i_00084940	contig18237	Hyphomicrobium	22491..24560(-)	penicillin-binding protein 1C	2070bp	689aa	0.65	Yes		COG4953	Membrane carboxypeptidase/penicillin-binding protein PbpC		[M] Cell wall/membrane/envelope biogenesis	pfam00905; pfam00912; pfam06832	Transpeptidase; Transgly; BiPBP_C	4.3e-21; 4.7e-52; 6.9e-20	KO:K05367	penicillin-binding protein 1C [EC:2.4.1.-]			TIGR02073	penicillin-binding protein 1C		2.4.1.-	Transferases. Glycosyltransferases. Hexosyltransferases.	GT51	GT51
2061982648	sg4i_00088960	contig18239	Hyphomicrobium	8865..9671(+)	monofunctional biosynthetic peptidoglycan transglycosylase	807bp	268aa	0.62		Yes	COG0744	Membrane carboxypeptidase (penicillin-binding protein)	5e-53	[M] Cell wall/membrane/envelope biogenesis	pfam00912	Transgly	2.4e-48	KO:K03814	monofunctional biosynthetic peptidoglycan transglycosylase [EC:2.4.1.-]	5e-57		TIGR02070	monofunctional biosynthetic peptidoglycan transglycosylase	4.2e-86	2.4.1.-	Transferases. Glycosyltransferases. Hexosyltransferases.	GT51	GT51	2.4.1.129
2062014003	sg4i_00402510	contig18456	Hyphomicrobium	9166..10998(+)	Membrane carboxypeptidase (penicillin-binding protein)	1833bp	611aa	0.61			COG0744	Membrane carboxypeptidase (penicillin-binding protein)	6e-127	[M] Cell wall/membrane/envelope biogenesis	pfam00905; pfam00912	Transpeptidase; Transgly	2.9e-30; 9.6e-64	KO:K05366	penicillin-binding protein 1A [EC:2.4.1.- 3.4.-.-]			TIGR02074	penicillin-binding protein, 1A family		2.4.1.-; 3.4.-	Transferases. Glycosyltransferases. Hexosyltransferases.; Hydrolases. Acting on peptide bonds (peptide hydrolases).	GT51	GT51	2.4.1.129
2062025546	sg4i_00517940	contig18643	Hyphomicrobium	1799..4051(-)	Membrane carboxypeptidase (penicillin-binding protein)	2253bp	750aa	0.59			COG0744	Membrane carboxypeptidase (penicillin-binding protein)	1e-103	[M] Cell wall/membrane/envelope biogenesis	pfam00905; pfam00912; pfam03793; pfam03793; pfam03793	Transpeptidase; Transgly; PASTA; PASTA; PASTA	5.8e-16; 2.6e-59; 1.1e-06; 1.9e-06; 2.8e-05										GT51	GT51	2.4.1.129
2061983475	sg4i_00097230	contig08317	Hyphomicrobium	864..1712(+)	Lipopolysaccharide biosynthesis proteins, LPS:glycosyltransferases	849bp	282aa	0.58			COG1442	Lipopolysaccharide biosynthesis proteins, LPS:glycosyltransferases	1e-09	[M] Cell wall/membrane/envelope biogenesis	pfam01501	Glyco_transf_8	3.6e-06										GT8
2061992733	sg4i_00189810	contig18301	Hyphomicrobium	6071..7675(-)	4-amino-4-deoxy-L-arabinose transferase and related glycosyltransferases of PMT family	1605bp	534aa	0.62		Yes	COG1807	4-amino-4-deoxy-L-arabinose transferase and related glycosyltransferases of PMT family	2e-23	[M] Cell wall/membrane/envelope biogenesis													GT83
2061981446	sg4i_00076940	contig18231	Hyphomicrobium	34438..35067(+)	Uncharacterized protein conserved in bacteria	630bp	209aa	0.65			COG5360	Uncharacterized protein conserved in bacteria	5e-33	[S] Function unknown	pfam07940	Hepar_II_III	8e-22										PL12	PL12
2061990273	sg4i_00165210	contig18285	Hyphomicrobium	3372..4736(+)	tol-pal system beta propeller repeat protein TolB	1365bp	454aa	0.63	Yes		COG0823	Periplasmic component of the Tol biopolymer transport system	9e-96	[U] Intracellular trafficking, secretion, and vesicular transport	pfam04052; pfam07676; pfam07676; pfam07676	TolB_N; PD40; PD40; PD40	2.0e-34; 8.2e-08; 1.4e-05; 6.9e-03	KO:K03641	TolB protein			TIGR02800	tol-pal system beta propeller repeat protein TolB				PL22
2062033439	sg4i_00596870	contig18663	Hyphomicrobium	3165..4565(-)	Protein of unknown function (DUF2793).	1401bp	466aa	0.6							pfam10983	DUF2793	1.6e-32										PL9
2061984832	sg4i_00110800	contig15098	Hyphomicrobium	2959..3594(+)	S-layer homology domain.	636bp	211aa	0.57	Yes						pfam00395; pfam00395	SLH; SLH	5.6e-14; 5.7e-11										SLH
2061999605	sg4i_00258530	contig19349	Hyphomicrobium	35..295(-)	S-layer homology domain.	261bp	86aa	0.64							pfam00395	SLH	3.8e-12										SLH
2062002393	sg4i_00286410	contig12716	Hyphomicrobium	2..1090(+)	S-layer homology domain.	1089bp	362aa	0.64							pfam00395; pfam00395; pfam00395	SLH; SLH; SLH	9.2e-15; 1.6e-13; 8.7e-10										SLH	GH111,CBM16	3.2.1.-
2061986730	sg4i_00129780	contig18764	Hyphomicrobium	4142..5767(-)	Choline dehydrogenase and related flavoproteins	1626bp	541aa	0.62			COG2303	Choline dehydrogenase and related flavoproteins		[E] Amino acid transport and metabolism	pfam00732; pfam05199	GMC_oxred_N; GMC_oxred_C	2.2e-84; 2.3e-42	KO:K00108	choline dehydrogenase [EC:1.1.99.1]						1.1.99.1	Choline dehydrogenase.		LDA1	1.1.3.7
2062017190	sg4i_00434380	contig18480	Hyphomicrobium	6189..7820(+)	Choline dehydrogenase and related flavoproteins	1632bp	543aa	0.63			COG2303	Choline dehydrogenase and related flavoproteins		[E] Amino acid transport and metabolism	pfam00732; pfam05199	GMC_oxred_N; GMC_oxred_C	1.4e-91; 6.7e-43	KO:K00108	choline dehydrogenase [EC:1.1.99.1]						1.1.99.1	Choline dehydrogenase.		LDA6	1.1.3.7
2062001044	sg4i_00272920	contig15576	Hyphomicrobium	5292..5891(+)	NAD(P)H:quinone oxidoreductase, type IV	600bp	199aa	0.61			COG0655	Multimeric flavodoxin WrbA	3e-41	[R] General function prediction only	pfam03358	FMN_red	1.1e-14	KO:K03809	Trp repressor binding protein	4e-87		TIGR01755	NAD(P)H:quinone oxidoreductase, type IV					LDA7	1.6.5.6
2061980241	sg4i_00064890	contig18225	Hyphomicrobium	24370..25815(-)	dihydrolipoamide dehydrogenase (EC 1.8.1.4)	1446bp	481aa	0.62			COG1249	Pyruvate/2-oxoglutarate dehydrogenase complex, dihydrolipoamide dehydrogenase (E3) component, and related enzymes		[C] Energy production and conversion	pfam00070; pfam02852; pfam07992	Pyr_redox; Pyr_redox_dim; Pyr_redox_2	7.7e-20; 2.9e-40; 8.7e-47	KO:K00382	dihydrolipoamide dehydrogenase [EC:1.8.1.4]		M00009: Citrate cycle (TCA cycle, Krebs cycle); M00011: Citrate cycle, second carbon oxidation; M00058: Leucine degradation, leucine => acetoacetate + acetyl-CoA; M00059: Isoleucine degradation, isoleucine => propionyl-CoA; M00679: Pyruvate oxidation, pyruvate => acetyl-CoA	TIGR01350	dihydrolipoamide dehydrogenase		1.8.1.4	Dihydrolipoyl dehydrogenase.		LO3
2062022932	sg4i_00491800	contig01240	Hyphomicrobium	1..1404(-)	Pyruvate/2-oxoglutarate dehydrogenase complex, dihydrolipoamide dehydrogenase (E3) component, and related enzymes	1404bp	468aa	0.58			COG1249	Pyruvate/2-oxoglutarate dehydrogenase complex, dihydrolipoamide dehydrogenase (E3) component, and related enzymes	2e-102	[C] Energy production and conversion	pfam00070; pfam02852; pfam07992	Pyr_redox; Pyr_redox_dim; Pyr_redox_2	1.2e-12; 1.1e-25; 3.1e-35	KO:K00520	mercuric reductase [EC:1.16.1.1]	2e-128					1.16.1.1	Mercury(II) reductase.		LO3
2062026121	sg4i_00523690	contig01953	Hyphomicrobium	1581..2948(-)	NADPH-glutathione reductase (EC 1.8.1.7)	1368bp	455aa	0.61			COG1249	Pyruvate/2-oxoglutarate dehydrogenase complex, dihydrolipoamide dehydrogenase (E3) component, and related enzymes	2e-120	[C] Energy production and conversion	pfam00070; pfam02852; pfam07992	Pyr_redox; Pyr_redox_dim; Pyr_redox_2	7.1e-19; 1.2e-36; 8.0e-43	KO:K00383	glutathione reductase (NADPH) [EC:1.8.1.7]			TIGR01424; TIGR01421	glutathione-disulfide reductase, plant; glutathione-disulfide reductase, animal/bacterial	0.0e+00; 0.0e+00	1.8.1.7	Glutathione-disulfide reductase.		LO3
2061976976	sg4i_00032240	contig04856	Not Binned	1..513(+)	Putative multicopper oxidases	513bp	171aa	0.66			COG2132	Putative multicopper oxidases	2e-08	[Q] Secondary metabolites biosynthesis, transport and catabolism	pfam07731	Cu-oxidase_2	2.3e-08													Laccase
2061979004	sg4i_00052520	contig07376	Not Binned	921..2411(+)	Putative multicopper oxidases	1491bp	496aa	0.69			COG2132	Putative multicopper oxidases	8e-66	[Q] Secondary metabolites biosynthesis, transport and catabolism	pfam00394; pfam07731; pfam07732	Cu-oxidase; Cu-oxidase_2; Cu-oxidase_3	4.6e-04; 2.3e-22; 1.0e-27	KO:K06324; KO:K08100	spore coat protein A; bilirubin oxidase [EC:1.3.3.5]	6.0e-93; 2.0e-92					1.3.3.5	Bilirubin oxidase.				Laccase
2061979584	sg4i_00058320	contig07903	Not Binned	27..494(+)	hypothetical protein	468bp	156aa	0.74														TIGR01409	Tat (twin-arginine translocation) pathway signal sequence	1.8e-06						Laccase
2061986051	sg4i_00122990	contig02998	Not Binned	1469..2974(-)	Putative multicopper oxidases	1506bp	501aa	0.72	Yes		COG2132	Putative multicopper oxidases	6e-56	[Q] Secondary metabolites biosynthesis, transport and catabolism	pfam07731; pfam07732	Cu-oxidase_2; Cu-oxidase_3	1.1e-19; 4.0e-22	KO:K06324	spore coat protein A	1e-100										Laccase
2061989915	sg4i_00161630	contig01573	Not Binned	335..1336(-)	Putative multicopper oxidases	1002bp	333aa	0.61	Yes		COG2132	Putative multicopper oxidases	8e-15	[Q] Secondary metabolites biosynthesis, transport and catabolism	pfam07731; pfam07732	Cu-oxidase_2; Cu-oxidase_3	4.5e-05; 1.7e-10	KO:K00368	nitrite reductase (NO-forming) [EC:1.7.2.1]	5e-113		TIGR02376	nitrite reductase, copper-containing	2.8e-52	1.7.2.1	Nitrite reductase (NO-forming).				Laccase
2061990605	sg4i_00168530	contig04202	Not Binned	2..523(+)	Putative multicopper oxidases	522bp	174aa	0.71			COG2132	Putative multicopper oxidases	5e-11	[Q] Secondary metabolites biosynthesis, transport and catabolism	pfam07732	Cu-oxidase_3	1.5e-17													Laccase
2062001314	sg4i_00275620	contig20865	Not Binned	1001..1597(+)	Uncharacterized conserved protein	597bp	199aa	0.75			COG1496	Uncharacterized conserved protein	2e-47	[S] Function unknown	pfam02578	Cu-oxidase_4	3.1e-52	KO:K05810	conserved hypothetical protein	7e-112		TIGR00726	conserved hypothetical protein TIGR00726	7.3e-19						Laccase
2062004951	sg4i_00311990	contig15121	Not Binned	230..487(-)	Putative multicopper oxidases	258bp	85aa	0.47			COG2132	Putative multicopper oxidases	4e-16	[Q] Secondary metabolites biosynthesis, transport and catabolism	pfam07731	Cu-oxidase_2	1.1e-20													Laccase
2062008294	sg4i_00345420	contig18911	Not Binned	4023..4934(+)	Putative multicopper oxidases	912bp	303aa	0.61	Yes		COG2132	Putative multicopper oxidases	6e-16	[Q] Secondary metabolites biosynthesis, transport and catabolism	pfam00394; pfam07732	Cu-oxidase; Cu-oxidase_3	1.6e-03; 4.7e-10	KO:K00368	nitrite reductase (NO-forming) [EC:1.7.2.1]	2e-97		TIGR02376	nitrite reductase, copper-containing	2.4e-34	1.7.2.1	Nitrite reductase (NO-forming).				Laccase
2062008341	sg4i_00345890	contig00492	Not Binned	2148..3065(+)	conserved hypothetical protein TIGR00726	918bp	305aa	0.63			COG1496	Uncharacterized conserved protein	8e-56	[S] Function unknown	pfam02578	Cu-oxidase_4	5.8e-72	KO:K05810	conserved hypothetical protein	2e-72		TIGR00726	conserved hypothetical protein TIGR00726	7.4e-65						Laccase
2062010999	sg4i_00372470	contig17454	Not Binned	417..1196(-)	conserved hypothetical protein TIGR00726	780bp	259aa	0.72	Yes		COG1496	Uncharacterized conserved protein	2e-53	[S] Function unknown	pfam02578	Cu-oxidase_4	2e-66	KO:K05810	conserved hypothetical protein			TIGR00726	conserved hypothetical protein TIGR00726	1.6e-52						Laccase
2062015885	sg4i_00421330	contig04182	Not Binned	32..1141(-)	Putative multicopper oxidases	1110bp	369aa	0.71	Yes		COG2132	Putative multicopper oxidases	5e-18	[Q] Secondary metabolites biosynthesis, transport and catabolism	pfam07731; pfam07732	Cu-oxidase_2; Cu-oxidase_3	3.3e-08; 2.9e-26					TIGR02376	nitrite reductase, copper-containing	5.4e-14						Laccase
2062016270	sg4i_00425180	contig19974	Not Binned	945..2012(-)	dissimilatory nitrite reductase (NO-forming), copper type apoprotein	1068bp	355aa	0.64	Yes		COG2132	Putative multicopper oxidases	3e-09	[Q] Secondary metabolites biosynthesis, transport and catabolism	pfam07732; pfam10518	Cu-oxidase_3; TAT_signal	9.0e-13; 1.0e-04	KO:K00368	nitrite reductase (NO-forming) [EC:1.7.2.1]			TIGR02376; TIGR01409	nitrite reductase, copper-containing; Tat (twin-arginine translocation) pathway signal sequence	0.0e+00; 1.0e-09	1.7.2.1	Nitrite reductase (NO-forming).				Laccase
2062017553	sg4i_00438010	contig04217	Not Binned	2..823(-)	Uncharacterized conserved protein	822bp	274aa	0.72			COG1496	Uncharacterized conserved protein	1e-43	[S] Function unknown	pfam02578	Cu-oxidase_4	2.2e-52					TIGR00726	conserved hypothetical protein TIGR00726	1.6e-33						Laccase
2062023362	sg4i_00496100	contig05571	Not Binned	3..491(-)	Uncharacterized conserved protein	489bp	163aa	0.68			COG1496	Uncharacterized conserved protein	2e-39	[S] Function unknown	pfam02578	Cu-oxidase_4	1.4e-49					TIGR00726	conserved hypothetical protein TIGR00726	1.6e-14						Laccase
2062027572	sg4i_00538200	contig11921	Not Binned	310..1089(-)	conserved hypothetical protein TIGR00726	780bp	259aa	0.71	Yes		COG1496	Uncharacterized conserved protein	3e-53	[S] Function unknown	pfam02578	Cu-oxidase_4	1.1e-64	KO:K05810	conserved hypothetical protein			TIGR00726	conserved hypothetical protein TIGR00726	1e-49						Laccase
2062028151	sg4i_00543990	contig18568	Not Binned	5108..7162(+)	Putative multicopper oxidases	2055bp	684aa	0.64	Yes	Yes	COG2132	Putative multicopper oxidases	2e-51	[Q] Secondary metabolites biosynthesis, transport and catabolism	pfam07731; pfam07732	Cu-oxidase_2; Cu-oxidase_3	1.3e-26; 3.3e-33													Laccase
2062031358	sg4i_00576060	contig10695	Not Binned	2..793(+)	Putative multicopper oxidases	792bp	263aa	0.74			COG2132	Putative multicopper oxidases	6e-33	[Q] Secondary metabolites biosynthesis, transport and catabolism	pfam00394; pfam07732	Cu-oxidase; Cu-oxidase_3	3.6e-05; 6.7e-18													Laccase
2062034823	sg4i_00610710	contig02126	Not Binned	695..2248(+)	Putative multicopper oxidases	1554bp	517aa	0.68	Yes		COG2132	Putative multicopper oxidases	2e-74	[Q] Secondary metabolites biosynthesis, transport and catabolism	pfam00394; pfam07731; pfam07732	Cu-oxidase; Cu-oxidase_2; Cu-oxidase_3	2.6e-21; 4.7e-27; 2.2e-36					TIGR01480	copper-resistance protein, CopA family	1e-23						Laccase
2062035296	sg4i_00615440	contig02039	Not Binned	180..2282(+)	Putative multicopper oxidases	2103bp	700aa	0.64	Yes	Yes	COG2132	Putative multicopper oxidases	6e-53	[Q] Secondary metabolites biosynthesis, transport and catabolism	pfam00394; pfam07731; pfam07732	Cu-oxidase; Cu-oxidase_2; Cu-oxidase_3	4.4e-06; 2.5e-26; 9.1e-36													Laccase
2062036644	sg4i_00628920	contig18607	Not Binned	772..2334(+)	Putative multicopper oxidases	1563bp	520aa	0.53	Yes	Yes	COG2132	Putative multicopper oxidases	1e-78	[Q] Secondary metabolites biosynthesis, transport and catabolism	pfam07731; pfam07731; pfam07732	Cu-oxidase_2; Cu-oxidase_2; Cu-oxidase_3	7.0e-31; 1.0e-15; 1.4e-39					TIGR02376	nitrite reductase, copper-containing	5.2e-12						Laccase
2061993466	sg4i_00197140	contig19807	Not Binned	837..2936(+)	Putative multicopper oxidases	2100bp	699aa	0.61	Yes	Yes	COG2132	Putative multicopper oxidases	3e-51	[Q] Secondary metabolites biosynthesis, transport and catabolism	pfam00394; pfam07731; pfam07732	Cu-oxidase; Cu-oxidase_2; Cu-oxidase_3	3.6e-04; 6.0e-26; 3.6e-34											LO1		Laccase
2061996112	sg4i_00223600	contig08917	Not Binned	2637..3908(+)	Putative multicopper oxidases	1272bp	424aa	0.62	Yes	Yes	COG2132	Putative multicopper oxidases	2e-23	[Q] Secondary metabolites biosynthesis, transport and catabolism	pfam07732	Cu-oxidase_3	2.6e-34											LO1		Laccase
2061996490	sg4i_00227380	contig19828	Not Binned	2013..2993(-)	Carbohydrate binding module (family 6).	981bp	326aa	0.6							pfam03422	CBM_6	2e-14										CBM13, CBM35	PL1,CBM13	4.2.2.2
2061985513	sg4i_00117610	contig00905	Not Binned	3792..4526(+)	hypothetical protein	735bp	244aa	0.58	Yes	Yes																	CBM16
2062013118	sg4i_00393660	contig07464	Not Binned	43..624(-)	Fibronectin type III domain.	582bp	194aa	0.61							pfam00041	fn3	1.4e-08										CBM16
2062034616	sg4i_00608640	contig03625	Not Binned	652..1293(-)	hypothetical protein	642bp	213aa	0.67	Yes	Yes																	CBM16
2061985163	sg4i_00114110	contig08433	Not Binned	1..344(+)	Carbohydrate binding domain.	344bp	114aa	0.74	Yes						pfam02018	CBM_4_9	2.3e-08										CBM16	GH18,CBM16	3.2.1.14
2062005446	sg4i_00316940	contig15718	Not Binned	2..2281(-)	Mg-chelatase subunit ChlD	2280bp	760aa	0.59	Yes		COG1240	Mg-chelatase subunit ChlD	9e-09	[H] Coenzyme transport and metabolism	pfam00092; pfam00553; pfam00553	VWA; CBM_2; CBM_2	9.8e-15; 6.3e-16; 1.8e-15										CBM2	GH18,CBM2
2062038223	sg4i_00644710	contig04560	Not Binned	76..438(-)	Cellobiohydrolase A (1,4-beta-cellobiosidase A)	363bp	121aa	0.69	Yes		COG5297	Cellobiohydrolase A (1,4-beta-cellobiosidase A)	6e-06	[G] Carbohydrate transport and metabolism	pfam00553	CBM_2	4.7e-31										CBM2	GH48,CBM2	3.2.1.4
2062017762	sg4i_00440100	contig02584	Not Binned	1..1848(-)	hypothetical protein	1848bp	616aa	0.58	Yes	Yes																	CBM20
2062002827	sg4i_00290750	contig13739	Not Binned	3..1589(-)	hypothetical protein	1587bp	529aa	0.62																			CBM22
2062011860	sg4i_00381080	contig04092	Not Binned	2..1630(-)	hypothetical protein	1629bp	543aa	0.63																			CBM22
2062032619	sg4i_00588670	contig15738	Not Binned	2..430(+)	Carbohydrate binding domain.	429bp	143aa	0.62							pfam02018	CBM_4_9	1.3e-10										CBM22
2061998584	sg4i_00248320	contig07724	Not Binned	2..553(+)	Carbohydrate binding domain./Glycosyl hydrolase family 10.	552bp	184aa	0.57							pfam00331; pfam02018	Glyco_hydro_10; CBM_4_9	5.6e-08; 4.2e-16										CBM22	GH10,CBM22,CBM9	3.2.1.8
2062017682	sg4i_00439300	contig12914	Not Binned	3..1157(-)	Beta-1,4-xylanase	1155bp	385aa	0.59			COG3693	Beta-1,4-xylanase	3e-12	[G] Carbohydrate transport and metabolism	pfam00331; pfam02018; pfam02018	Glyco_hydro_10; CBM_4_9; CBM_4_9	7.6e-26; 1.2e-19; 7.9e-07										CBM22	GH10,CBM22,CBM9	3.2.1.8
2062011611	sg4i_00378590	contig04089	Not Binned	2..415(+)	Cellulose binding domain.	414bp	137aa	0.6							pfam00942	CBM_3	1.2e-27										CBM3	CBM3	3.2.1.78
2062020760	sg4i_00470080	contig03361	Not Binned	630..1358(-)	Cellulose binding domain.	729bp	242aa	0.63							pfam00942	CBM_3	3.7e-31										CBM3	CBM3	3.2.1.78
2062027994	sg4i_00542420	contig11087	Not Binned	16..393(-)	Cellulose binding domain.	378bp	125aa	0.63							pfam00942	CBM_3	7.1e-32										CBM3	CBM3	3.2.1.78
2062032020	sg4i_00582680	contig18032	Not Binned	2459..2902(-)	Cellulose binding domain.	444bp	147aa	0.61							pfam00942	CBM_3	1.1e-31										CBM3	CBM3	3.2.1.78
2061991721	sg4i_00179690	contig18295	Not Binned	1..480(+)	Cellulose binding domain.	480bp	159aa	0.63							pfam00942	CBM_3	4e-30										CBM3	GH10,CBM22,CBM3	3.2.1.8
2062011399	sg4i_00376470	contig04088	Not Binned	2773..3285(-)	Cellulose binding domain.	513bp	170aa	0.63							pfam00942	CBM_3	2.5e-29										CBM3	GH10,CBM22,CBM3	3.2.1.8
2062027091	sg4i_00533390	contig11032	Not Binned	2..919(+)	Predicted solute binding protein	918bp	306aa	0.65			COG3889	Predicted solute binding protein	5e-06	[R] General function prediction only	pfam00942; pfam00942	CBM_3; CBM_3	4.7e-32; 4.8e-29										CBM3	GH10,CBM22,CBM3	3.2.1.8
2061982775	sg4i_00090230	contig10984	Not Binned	3..446(+)	Cellulose binding domain.	444bp	147aa	0.61							pfam00942	CBM_3	9e-33										CBM3	GH5,CBM33,CBM3	3.2.1.78
2062013523	sg4i_00397710	contig17516	Not Binned	1..366(+)	Cellulose binding domain.	366bp	121aa	0.6							pfam00942	CBM_3	1.1e-20										CBM3	GH5,CBM33,CBM3	3.2.1.78
2062018759	sg4i_00450070	contig11117	Not Binned	90..323(+)	Cellulose binding domain.	234bp	78aa	0.63							pfam00942	CBM_3	4e-28										CBM3	GH5,CBM33,CBM3	3.2.1.78
2062029403	sg4i_00556510	contig13492	Not Binned	303..545(+)	Cellulose binding domain.	243bp	81aa	0.69	Yes						pfam00942	CBM_3	2.7e-14										CBM3	GH5,CBM33,CBM3	3.2.1.78
2061984180	sg4i_00104280	contig02560	Not Binned	92..445(+)	F5/8 type C domain.	354bp	118aa	0.62							pfam00754	F5_F8_type_C	1.2e-05										CBM32
2061992303	sg4i_00185510	contig11309	Not Binned	7..219(+)	F5/8 type C domain.	213bp	71aa	0.63							pfam00754	F5_F8_type_C	1e-06										CBM32
2062002403	sg4i_00286510	contig13733	Not Binned	1..771(+)	F5/8 type C domain.	771bp	256aa	0.63							pfam00754	F5_F8_type_C	6.5e-07										CBM32
2062002800	sg4i_00290480	contig01701	Not Binned	3..701(+)	hypothetical protein	699bp	232aa	0.64	Yes	Yes																	CBM32
2062014641	sg4i_00408890	contig02553	Not Binned	1935..2432(+)	F5/8 type C domain.	498bp	166aa	0.65							pfam00754	F5_F8_type_C	5.3e-11										CBM32
2062015524	sg4i_00417720	contig09918	Not Binned	3..446(+)	hypothetical protein	444bp	147aa	0.62																			CBM32
2062028677	sg4i_00549250	contig01294	Not Binned	2726..4186(-)	F5/8 type C domain.	1461bp	486aa	0.65							pfam00754	F5_F8_type_C	6.4e-06										CBM32
2062028748	sg4i_00549960	contig20573	Not Binned	1476..1643(+)	F5/8 type C domain.	168bp	56aa	0.64							pfam00754	F5_F8_type_C	6.4e-09										CBM32
2062029978	sg4i_00562260	contig02001	Not Binned	2..826(+)	hypothetical protein	825bp	274aa	0.73																			CBM32
2062034130	sg4i_00603780	contig13086	Not Binned	10..435(+)	F5/8 type C domain.	426bp	141aa	0.72							pfam00754	F5_F8_type_C	9e-19										CBM32
2061987238	sg4i_00134860	contig00732	Not Binned	81..362(+)	F5/8 type C domain.	282bp	93aa	0.61							pfam00754	F5_F8_type_C	1e-15										CBM32	CBM32
2061996163	sg4i_00224110	contig19326	Not Binned	3..281(+)	F5/8 type C domain.	279bp	92aa	0.6							pfam00754	F5_F8_type_C	1.9e-15										CBM32	CBM32
2062024468	sg4i_00507160	contig21081	Not Binned	110..565(+)	F5/8 type C domain.	456bp	151aa	0.64							pfam00754	F5_F8_type_C	7e-09										CBM32	CBM32
2062028679	sg4i_00549270	contig01294	Not Binned	5429..6853(-)	F5/8 type C domain.	1425bp	474aa	0.6							pfam00754; pfam00754	F5_F8_type_C; F5_F8_type_C	1.3e-19; 2.2e-19										CBM32	CBM32
2062028746	sg4i_00549940	contig20573	Not Binned	140..421(+)	F5/8 type C domain.	282bp	93aa	0.62							pfam00754	F5_F8_type_C	1e-15										CBM32	CBM32
2062011931	sg4i_00381790	contig11162	Not Binned	3..665(+)	F5/8 type C domain./Fibronectin type III domain.	663bp	221aa	0.65	Yes						pfam00041; pfam00754	fn3; F5_F8_type_C	4.8e-09; 6.4e-19										CBM32	CBM32	3.2.1.132,3.2.1.4
2062025805	sg4i_00520530	contig03420	Not Binned	1..1008(-)	hypothetical protein	1008bp	336aa	0.72	Yes	Yes																	CBM32	GH78
2062011612	sg4i_00378600	contig04089	Not Binned	524..1432(+)	Uncharacterized protein conserved in bacteria	909bp	303aa	0.6	Yes	Yes	COG3397	Uncharacterized protein conserved in bacteria	8e-27	[S] Function unknown	pfam03067	Chitin_bind_3	5.4e-47	KO:K03933	chitin-binding protein	1e-82							CBM33	GH5,CBM33,CBM3	3.2.1.78
2061995849	sg4i_00220970	contig00397	Not Binned	2..220(-)	Alpha amylase, N-terminal ig-like domain.	219bp	73aa	0.61							pfam02903	Alpha-amylase_N	1.8e-07										CBM34
2062001029	sg4i_00272770	contig12700	Not Binned	3..617(-)	Carbohydrate binding module (family 6).	615bp	205aa	0.6							pfam03422	CBM_6	7e-08										CBM35
2062005445	sg4i_00316930	contig13806	Not Binned	3719..3991(+)	hypothetical protein	273bp	90aa	0.63																			CBM35
2062007712	sg4i_00339600	contig14985	Not Binned	1..661(+)	hypothetical protein	661bp	220aa	0.66	Yes																		CBM35
2062009442	sg4i_00356900	contig04337	Not Binned	2..348(-)	Carbohydrate binding module (family 6).	347bp	115aa	0.61	Yes						pfam03422	CBM_6	5.7e-07										CBM35
2062014871	sg4i_00411190	contig01164	Not Binned	2366..3538(-)	Predicted membrane protein	1173bp	390aa	0.63	Yes		COG1470	Predicted membrane protein	4e-48	[S] Function unknown	pfam10633; pfam10633; pfam11614	NPCBM_assoc; NPCBM_assoc; Bre5	3.7e-16; 4.4e-08; 1.6e-04										CBM35
2062030589	sg4i_00568370	contig01316	Not Binned	723..1268(+)	conserved hypothetical protein	546bp	181aa	0.63			COG2731	Beta-galactosidase, beta subunit	2e-11	[G] Carbohydrate transport and metabolism	pfam03422; pfam04074	CBM_6; DUF386	2.9e-06; 1.3e-10					TIGR00022	conserved hypothetical protein	4.9e-15			CBM35
2062034425	sg4i_00606730	contig04984	Not Binned	3..446(+)	Plastocyanin	444bp	147aa	0.72			COG3794	Plastocyanin	6e-08	[C] Energy production and conversion	pfam00127	Copper-bind	1e-12										CBM35
2062019087	sg4i_00453350	contig02600	Not Binned	1..3477(+)	FOG: PKD repeat	3477bp	1158aa	0.71			COG3291	FOG: PKD repeat	5e-09	[R] General function prediction only	pfam00801; pfam06439	PKD; DUF1080	3.5e-08; 6.1e-26										CBM35	CBM13
2062013986	sg4i_00402340	contig12863	Not Binned	78..3437(+)	Domain of Unknown Function (DUF1080)./Carbohydrate binding module (family 6)./Protein of unknown function (DUF1349).	3360bp	1120aa	0.68							pfam03422; pfam03422; pfam06439; pfam07081	CBM_6; CBM_6; DUF1080; DUF1349	6.4e-14; 2.6e-12; 3.7e-28; 3.7e-07										CBM35	CBM35	2.4.1.-
2061995354	sg4i_00216020	contig05442	Not Binned	3..560(+)	Carbohydrate binding module (family 6).	558bp	186aa	0.69							pfam03422	CBM_6	2.8e-12										CBM35	CBM35	3.2.1.59
2062006754	sg4i_00330020	contig11008	Not Binned	61..723(-)	Carbohydrate binding module (family 6).	663bp	221aa	0.64							pfam03422	CBM_6	2.3e-08										CBM35	PL11	4.2.2.-
2062022658	sg4i_00489060	contig19024	Not Binned	4561..5742(-)	Carbohydrate binding module (family 6).	1182bp	393aa	0.63							pfam03422	CBM_6	5.4e-10										CBM35	PL11	4.2.2.-
2062004691	sg4i_00309390	contig19386	Not Binned	3..1970(-)	Bacterial Ig-like domain (group 4)./Fibronectin type III domain.	1968bp	656aa	0.52	Yes	Yes					pfam00041; pfam07532	fn3; Big_4	7.0e-08; 4.3e-11										CBM37
2062005662	sg4i_00319100	contig17342	Not Binned	27..1034(-)	Bacterial Ig-like domain (group 4)./Fibronectin type III domain.	1008bp	335aa	0.54	Yes						pfam00041; pfam07532	fn3; Big_4	1.1e-07; 1.6e-11										CBM37
2062020337	sg4i_00465850	contig09495	Not Binned	43..531(-)	Listeria/Bacterioides repeat	489bp	163aa	0.6							pfam00041; pfam09479	fn3; Flg_new	1.4e-07; 2.5e-11					TIGR02543	Listeria/Bacterioides repeat	1.1e-09			CBM37
2062035482	sg4i_00617300	contig09332	Not Binned	3..412(-)	hypothetical protein	410bp	137aa	0.45																			CBM37
2062016539	sg4i_00427870	contig11652	Not Binned	2..403(-)	Carbohydrate binding domain.	402bp	134aa	0.61	Yes						pfam02018	CBM_4_9	1.9e-07										CBM4	GH10,CBM4	3.2.1.8
2062013482	sg4i_00397300	contig00538	Not Binned	13217..14533(-)	Carbohydrate binding domain./Protein of unknown function (DUF1533).	1317bp	438aa	0.64	Yes						pfam02018; pfam07550	CBM_4_9; DUF1533	7.1e-15; 6.9e-14										CBM4	GH16,CBM32,CBM4	3.2.1.39
2061979444	sg4i_00056920	contig02193	Not Binned	1583..2854(+)	hypothetical protein	1272bp	424aa	0.58																			CBM40
2061974953	sg4i_00012010	contig05624	Not Binned	149..787(-)	PKD domain.	639bp	212aa	0.74	Yes						pfam00801	PKD	8.7e-12										CBM44
2061978975	sg4i_00052230	contig08118	Not Binned	2..139(+)	PKD domain.	138bp	46aa	0.71							pfam00801	PKD	2.7e-09										CBM44
2061996837	sg4i_00230850	contig13154	Not Binned	25..423(+)	FOG: PKD repeat	399bp	133aa	0.69			COG3291	FOG: PKD repeat	1e-08	[R] General function prediction only	pfam00801	PKD	3.9e-19										CBM44
2062012245	sg4i_00384930	contig20443	Not Binned	2..1807(+)	FOG: PKD repeat	1806bp	602aa	0.72	Yes		COG3291	FOG: PKD repeat	2e-09	[R] General function prediction only	pfam00127; pfam00801	Copper-bind; PKD	9.0e-06; 1.5e-13										CBM44
2062014485	sg4i_00407330	contig03452	Not Binned	60..284(-)	PKD domain.	225bp	75aa	0.72							pfam00801	PKD	1.4e-09										CBM44
2062028864	sg4i_00551120	contig04622	Not Binned	118..402(-)	hypothetical protein	285bp	95aa	0.61																			CBM44
2062030259	sg4i_00565070	contig12918	Not Binned	36..318(+)	PKD domain.	283bp	94aa	0.69							pfam00801	PKD	7.2e-09										CBM44
2062037267	sg4i_00635150	contig14868	Not Binned	1..1059(+)	40-residue YVTN family beta-propeller repeat	1059bp	352aa	0.72			COG3391	Uncharacterized conserved protein	1e-16	[S] Function unknown	pfam00801; pfam10282	PKD; Muc_lac_enz	1.4e-14; 2.1e-04					TIGR02276	40-residue YVTN family beta-propeller repeat	3.9e-40			CBM44
2061974007	sg4i_00002550	contig02042	Not Binned	2..4678(+)	FOG: PKD repeat	4677bp	1558aa	0.71			COG3291	FOG: PKD repeat	4e-07	[R] General function prediction only	pfam00801; pfam00801; pfam00801; pfam06439	PKD; PKD; PKD; DUF1080	4.8e-12; 1.1e-11; 1.0e-07; 2.5e-35										CBM44	CBM13
2062022319	sg4i_00485670	contig12980	Not Binned	1..2823(-)	Uncharacterized protein conserved in bacteria	2823bp	941aa	0.7			COG3828	Uncharacterized protein conserved in bacteria	9e-10	[S] Function unknown	pfam00801; pfam00801; pfam06283	PKD; PKD; ThuA	3.0e-15; 3.9e-15; 4.7e-56										CBM44	CBM13
2061988631	sg4i_00148790	contig19775	Not Binned	565..4044(+)	FOG: PKD repeat	3480bp	1159aa	0.7	Yes		COG3291	FOG: PKD repeat	8e-11	[R] General function prediction only	pfam00801; pfam06283; pfam07081	PKD; ThuA; DUF1349	1.7e-19; 9.5e-56; 8.3e-07										CBM44	CBM13,CBM6
2062009673	sg4i_00359210	contig12810	Not Binned	1..3804(+)	Glucose/sorbosone dehydrogenases	3804bp	1268aa	0.68			COG2133	Glucose/sorbosone dehydrogenases	2e-17	[G] Carbohydrate transport and metabolism	pfam00801; pfam00801; pfam06283; pfam07081; pfam07081	PKD; PKD; ThuA; DUF1349; DUF1349	1.2e-17; 9.2e-12; 9.0e-57; 2.5e-07; 7.2e-07					TIGR01435	glutamate--cysteine ligase/gamma-glutamylcysteine synthetase, Streptococcus agalactiae type	0.066			CBM44	CBM13,CBM6
2062032234	sg4i_00584820	contig19154	Not Binned	1..3285(-)	FOG: PKD repeat	3285bp	1095aa	0.69			COG3291	FOG: PKD repeat	3e-10	[R] General function prediction only	pfam00801	PKD	4.2e-19										CBM44	CBM13,CBM6
2061985758	sg4i_00120060	contig05346	Not Binned	439..1086(-)	1,4-alpha-glucan branching enzyme	648bp	215aa	0.7		Yes	COG0296	1,4-alpha-glucan branching enzyme	3e-08	[G] Carbohydrate transport and metabolism	pfam02922	CBM_48	1.3e-08										CBM48
2062004048	sg4i_00302960	contig03171	Not Binned	126..1079(-)	Carbohydrate-binding module 48 (Isoamylase N-terminal domain).	954bp	317aa	0.69	Yes						pfam02922	CBM_48	2.8e-05										CBM48
2062008324	sg4i_00345720	contig09080	Not Binned	3..314(+)	1,4-alpha-glucan branching enzyme	312bp	103aa	0.69			COG0296	1,4-alpha-glucan branching enzyme	6e-10	[G] Carbohydrate transport and metabolism	pfam02922	CBM_48	1.7e-10										CBM48
2062016436	sg4i_00426840	contig04192	Not Binned	519..1226(-)	1,4-alpha-glucan branching enzyme	708bp	235aa	0.7			COG0296	1,4-alpha-glucan branching enzyme	6e-07	[G] Carbohydrate transport and metabolism	pfam02922	CBM_48	9.4e-05										CBM48
2062028793	sg4i_00550410	contig04544	Not Binned	1297..1587(-)	hypothetical protein	291bp	96aa	0.68																			CBM48
2062030850	sg4i_00570980	contig10428	Not Binned	6..320(+)	1,4-alpha-glucan branching enzyme	315bp	104aa	0.72	Yes		COG0296	1,4-alpha-glucan branching enzyme	3e-06	[G] Carbohydrate transport and metabolism	pfam02922	CBM_48	1.7e-11										CBM48
2062012273	sg4i_00385210	contig00529	Not Binned	2481..2777(+)	1,4-alpha-glucan branching enzyme	297bp	98aa	0.65			COG0296	1,4-alpha-glucan branching enzyme	2e-06	[G] Carbohydrate transport and metabolism	pfam02922	CBM_48	1.1e-07										CBM48	CBM48
2062034582	sg4i_00608300	contig09327	Not Binned	3..379(-)	maltooligosyl trehalose hydrolase (EC 3.2.1.141)	377bp	126aa	0.74			COG0296	1,4-alpha-glucan branching enzyme	1e-21	[G] Carbohydrate transport and metabolism	pfam02922	CBM_48	1.1e-09										CBM48	GH13,CBM48
2061983036	sg4i_00092840	contig02975	Not Binned	2..604(-)	1,4-alpha-glucan branching enzyme	603bp	201aa	0.66			COG0296	1,4-alpha-glucan branching enzyme	2e-46	[G] Carbohydrate transport and metabolism	pfam02922	CBM_48	2.1e-20										CBM48	GH13,CBM48	2.4.1.18
2061985496	sg4i_00117440	contig13006	Not Binned	3..288(+)	1,4-alpha-glucan branching enzyme	286bp	95aa	0.63			COG0296	1,4-alpha-glucan branching enzyme	6e-23	[G] Carbohydrate transport and metabolism	pfam02922	CBM_48	3e-20										CBM48	GH13,CBM48	2.4.1.18
2062013848	sg4i_00400960	contig14020	Not Binned	1209..1655(+)	1,4-alpha-glucan branching enzyme	447bp	149aa	0.64			COG0296	1,4-alpha-glucan branching enzyme	9e-33	[G] Carbohydrate transport and metabolism	pfam02922	CBM_48	5.1e-21										CBM48	GH13,CBM48	2.4.1.18
2062023880	sg4i_00501280	contig12999	Not Binned	467..961(-)	Carbohydrate binding domain.	495bp	164aa	0.73							pfam02839	CBM_5_12	7.3e-05										CBM5
2061987434	sg4i_00136820	contig18268	Not Binned	19625..19999(-)	LysM domain.	375bp	124aa	0.55	Yes	Yes					pfam01476	LysM	9.3e-07										CBM50
2061987786	sg4i_00140340	contig15170	Not Binned	5798..6775(-)	LysM domain.	978bp	325aa	0.61							pfam01476	LysM	5.4e-09					TIGR02907	stage VI sporulation protein D	1.7e-14			CBM50
2061994305	sg4i_00205530	contig08835	Not Binned	2..1516(+)	Uncharacterized protein containing LysM domain	1515bp	505aa	0.72			COG1652	Uncharacterized protein containing LysM domain	1e-05	[S] Function unknown													CBM50
2061996499	sg4i_00227470	contig11335	Not Binned	3..887(-)	Predicted glycosyl hydrolase	885bp	295aa	0.71	Yes		COG3858	Predicted glycosyl hydrolase	6e-11	[R] General function prediction only	pfam01476; pfam01476; pfam01476	LysM; LysM; LysM	1.5e-11; 1.1e-08; 3.3e-05										CBM50
2061998747	sg4i_00249950	contig14194	Not Binned	2..642(-)	Membrane proteins related to metalloendopeptidases	641bp	214aa	0.6			COG0739	Membrane proteins related to metalloendopeptidases	5e-15	[M] Cell wall/membrane/envelope biogenesis	pfam01476; pfam01551; pfam07501	LysM; Peptidase_M23; G5	1.9e-05; 4.3e-10; 7.7e-19										CBM50
2062004270	sg4i_00305180	contig20382	Not Binned	1816..2208(+)	FOG: LysM repeat	393bp	131aa	0.71	Yes		COG1388	FOG: LysM repeat	5e-15	[M] Cell wall/membrane/envelope biogenesis	pfam01476; pfam01476	LysM; LysM	1.2e-15; 1.3e-14										CBM50
2062004494	sg4i_00307420	contig20384	Not Binned	1875..2207(+)	FOG: LysM repeat	333bp	111aa	0.69	Yes		COG1388	FOG: LysM repeat	2e-14	[M] Cell wall/membrane/envelope biogenesis	pfam01476; pfam01476	LysM; LysM	8.8e-16; 9.3e-15										CBM50
2062008712	sg4i_00349600	contig11464	Not Binned	18608..19330(-)	Membrane proteins related to metalloendopeptidases	723bp	240aa	0.56	Yes	Yes	COG0739	Membrane proteins related to metalloendopeptidases	4e-15	[M] Cell wall/membrane/envelope biogenesis	pfam01476; pfam01551	LysM; Peptidase_M23	4.9e-14; 6.1e-24					TIGR02899	spore coat assembly protein SafA	4.6e-22			CBM50
2062012389	sg4i_00386370	contig06431	Not Binned	1..951(-)	LysM domain.	951bp	317aa	0.65		Yes					pfam01476	LysM	0.00012										CBM50
2062014122	sg4i_00403700	contig10492	Not Binned	214..933(-)	uncharacterized protein, YkwD family	720bp	239aa	0.63	Yes	Yes	COG2340	Uncharacterized protein with SCP/PR1 domains	1e-29	[S] Function unknown	pfam00188; pfam01476	CAP; LysM	2.5e-21; 6.9e-12					TIGR02909	uncharacterized protein, YkwD family	2.6e-79			CBM50
2062015202	sg4i_00414500	contig01832	Not Binned	1405..1848(-)	LysM domain.	444bp	147aa	0.66		Yes					pfam01476	LysM	1.5e-08										CBM50
2062017224	sg4i_00434720	contig05988	Not Binned	1..468(+)	LysM domain./Immunoglobulin-like domain of bacterial spore germination.	468bp	155aa	0.65							pfam01476; pfam10648	LysM; Gmad2	2.7e-08; 8.4e-20										CBM50
2062018544	sg4i_00447920	contig04232	Not Binned	525..1346(+)	FOG: LysM repeat	822bp	273aa	0.69	Yes		COG1388	FOG: LysM repeat	4e-09	[M] Cell wall/membrane/envelope biogenesis	pfam01476	LysM	1.1e-13										CBM50
2062020293	sg4i_00465410	contig16110	Not Binned	149..925(-)	Cell wall-associated hydrolases (invasion-associated proteins)	777bp	258aa	0.71	Yes		COG0791	Cell wall-associated hydrolases (invasion-associated proteins)	6e-19	[M] Cell wall/membrane/envelope biogenesis	pfam00877; pfam01476; pfam01476	NLPC_P60; LysM; LysM	2.4e-24; 4.1e-15; 4.4e-14										CBM50
2062020977	sg4i_00472250	contig03367	Not Binned	2..958(-)	LysM domain.	957bp	319aa	0.71							pfam01476; pfam01476; pfam01476	LysM; LysM; LysM	2.8e-08; 1.1e-04; 4.6e-04										CBM50
2062022391	sg4i_00486390	contig01234	Not Binned	104..883(-)	FOG: LysM repeat	780bp	259aa	0.69		Yes	COG1388	FOG: LysM repeat	4e-07	[M] Cell wall/membrane/envelope biogenesis	pfam01476	LysM	9.4e-13										CBM50
2062026320	sg4i_00525680	contig19054	Not Binned	3567..4649(-)	FOG: LysM repeat	1083bp	360aa	0.63			COG1388	FOG: LysM repeat	4e-08	[M] Cell wall/membrane/envelope biogenesis	pfam01476; pfam01476	LysM; LysM	1.7e-12; 2.0e-10										CBM50
2062026566	sg4i_00528140	contig01957	Not Binned	14649..15464(+)	FOG: LysM repeat	816bp	271aa	0.65	Yes		COG1388	FOG: LysM repeat	5e-06	[M] Cell wall/membrane/envelope biogenesis	pfam01476; pfam01476; pfam01476; pfam10648	LysM; LysM; LysM; Gmad2	2.6e-08; 3.4e-08; 1.2e-05; 4.1e-18										CBM50
2062027754	sg4i_00540020	contig00674	Not Binned	5079..6260(+)	Uncharacterized protein conserved in bacteria	1182bp	393aa	0.69			COG4990	Uncharacterized protein conserved in bacteria	2e-12	[S] Function unknown	pfam01476; pfam01476; pfam01476	LysM; LysM; LysM	9.4e-13; 9.6e-10; 6.9e-07										CBM50
2062029288	sg4i_00555360	contig02010	Not Binned	70..357(-)	LysM domain.	288bp	96aa	0.58							pfam01476	LysM	1.1e-06										CBM50
2062031271	sg4i_00575190	contig04652	Not Binned	1..558(-)	spore coat assembly protein SafA	558bp	186aa	0.62			COG3858	Predicted glycosyl hydrolase	5e-08	[R] General function prediction only	pfam01476; pfam01476	LysM; LysM	8.9e-18; 4.5e-11					TIGR02899	spore coat assembly protein SafA	5.2e-29			CBM50
2062035599	sg4i_00618470	contig08641	Not Binned	67..456(+)	LysM domain.	390bp	129aa	0.66							pfam01476	LysM	6.4e-08										CBM50
2062036683	sg4i_00629310	contig05328	Not Binned	2..562(+)	FOG: LysM repeat	561bp	186aa	0.66			COG1388	FOG: LysM repeat	1e-05	[M] Cell wall/membrane/envelope biogenesis	pfam01476; pfam10648	LysM; Gmad2	1.3e-08; 1.0e-19										CBM50
2061986360	sg4i_00126080	contig01549	Not Binned	127..1356(-)	gamma-D-glutamyl-{L}-meso-diaminopimelate peptidase I (EC:3.4.19.11). Metallo peptidase. MEROPS family M14C	1230bp	409aa	0.64			COG2866	Predicted carboxypeptidase	1e-17	[E] Amino acid transport and metabolism	pfam00246; pfam01476	Peptidase_M14; LysM	3.2e-38; 5.6e-08	KO:K01308	g-D-glutamyl-meso-diaminopimelate peptidase [EC:3.4.19.11]						3.4.19.11	Gamma-D-glutamyl-meso-diaminopimelate peptidase.	CBM50	CBM50
2061998166	sg4i_00244140	contig13634	Not Binned	2827..3936(-)	gamma-D-glutamyl-{L}-meso-diaminopimelate peptidase I (EC:3.4.19.11). Metallo peptidase. MEROPS family M14C	1110bp	369aa	0.65			COG2866	Predicted carboxypeptidase	1e-17	[E] Amino acid transport and metabolism	pfam00246; pfam01476	Peptidase_M14; LysM	2.3e-38; 4.9e-08	KO:K01308	g-D-glutamyl-meso-diaminopimelate peptidase [EC:3.4.19.11]	4e-129					3.4.19.11	Gamma-D-glutamyl-meso-diaminopimelate peptidase.	CBM50	CBM50
2062008583	sg4i_00348310	contig13872	Not Binned	5109..6062(+)	gamma-D-glutamyl-{L}-meso-diaminopimelate peptidase I (EC:3.4.19.11). Metallo peptidase. MEROPS family M14C	954bp	317aa	0.64	Yes		COG2866	Predicted carboxypeptidase	5e-07	[E] Amino acid transport and metabolism	pfam00246; pfam01476; pfam01476	Peptidase_M14; LysM; LysM	2.1e-26; 1.9e-11; 3.8e-04	KO:K01308	g-D-glutamyl-meso-diaminopimelate peptidase [EC:3.4.19.11]	8e-92					3.4.19.11	Gamma-D-glutamyl-meso-diaminopimelate peptidase.	CBM50	CBM50
2062027866	sg4i_00541140	contig00675	Not Binned	615..1811(+)	gamma-D-glutamyl-{L}-meso-diaminopimelate peptidase I (EC:3.4.19.11). Metallo peptidase. MEROPS family M14C	1197bp	398aa	0.62	Yes		COG2866	Predicted carboxypeptidase	2e-17	[E] Amino acid transport and metabolism	pfam00246; pfam01476; pfam01476	Peptidase_M14; LysM; LysM	1.1e-35; 2.6e-11; 5.2e-04	KO:K01308	g-D-glutamyl-meso-diaminopimelate peptidase [EC:3.4.19.11]						3.4.19.11	Gamma-D-glutamyl-meso-diaminopimelate peptidase.	CBM50	CBM50
2061992819	sg4i_00190670	contig00371	Not Binned	10182..11513(+)	Membrane proteins related to metalloendopeptidases	1332bp	443aa	0.59			COG0739	Membrane proteins related to metalloendopeptidases	5e-35	[M] Cell wall/membrane/envelope biogenesis	pfam01476; pfam01551; pfam07501	LysM; Peptidase_M23; G5	3.0e-05; 3.7e-31; 8.4e-20										CBM50	GH23
2062028994	sg4i_00552420	contig11954	Not Binned	627..2186(+)	Membrane proteins related to metalloendopeptidases	1560bp	519aa	0.61	Yes		COG0739	Membrane proteins related to metalloendopeptidases	7e-34	[M] Cell wall/membrane/envelope biogenesis	pfam01476; pfam01551; pfam07501	LysM; Peptidase_M23; G5	1.6e-04; 4.5e-31; 1.6e-17										CBM50	GH23
2062011883	sg4i_00381310	contig13964	Not Binned	1..1044(+)	Membrane proteins related to metalloendopeptidases	1044bp	348aa	0.65			COG0739	Membrane proteins related to metalloendopeptidases	6e-33	[M] Cell wall/membrane/envelope biogenesis	pfam01476; pfam01551	LysM; Peptidase_M23	6.4e-08; 2.1e-29										CBM50	GH24
2062019643	sg4i_00458910	contig04948	Not Binned	495..809(-)	NPCBM/NEW2 domain.	315bp	104aa	0.69							pfam08305	NPCBM	3.2e-09										CBM51
2061990474	sg4i_00167220	contig05911	Not Binned	2..493(+)	hypothetical protein	492bp	164aa	0.61																			CBM54
2062005492	sg4i_00317400	contig12657	Not Binned	3..485(+)	hypothetical protein	483bp	160aa	0.62																			CBM54
2062029494	sg4i_00557420	contig04796	Not Binned	383..586(-)	hypothetical protein	204bp	68aa	0.6																			CBM54
2062008847	sg4i_00350950	contig15816	Not Binned	5227..6927(+)	S-layer homology domain.	1701bp	567aa	0.6	Yes						pfam00395; pfam00395; pfam00395	SLH; SLH; SLH	6.3e-15; 4.6e-11; 2.4e-10										CBM54, SLH	GH16,CBM4	3.2.1.73,3.2.1.6
2062026279	sg4i_00525270	contig04472	Not Binned	810..1724(+)	S-layer homology domain.	915bp	304aa	0.63	Yes	Yes					pfam00395; pfam00395; pfam00395	SLH; SLH; SLH	1.3e-12; 1.4e-10; 7.7e-10										CBM54, SLH	GH16,CBM4	3.2.1.73,3.2.1.6
2062027094	sg4i_00533420	contig04350	Not Binned	2..723(-)	S-layer homology domain.	722bp	241aa	0.67							pfam00395	SLH	2.7e-05										CBM54, SLH	GH16,CBM4	3.2.1.73,3.2.1.6
2062031937	sg4i_00581850	contig05511	Not Binned	3..788(-)	S-layer homology domain.	786bp	262aa	0.63							pfam00395	SLH	3.9e-10										CBM54, SLH	GH16,CBM4	3.2.1.73,3.2.1.6
2062008698	sg4i_00349460	contig11464	Not Binned	5108..5497(+)	Heme/copper-type cytochrome/quinol oxidases, subunit 2	390bp	129aa	0.57	Yes		COG1622	Heme/copper-type cytochrome/quinol oxidases, subunit 2	2e-10	[C] Energy production and conversion	pfam00116	COX2	2.8e-09										CBM56
2062022176	sg4i_00484240	contig04582	Not Binned	20..487(-)	Bacterial surface proteins containing Ig-like domains	468bp	156aa	0.63			COG5492	Bacterial surface proteins containing Ig-like domains	2e-14	[N] Cell motility	pfam02368	Big_2	2.6e-15										CBM56
2061989248	sg4i_00154960	contig18278	Not Binned	17577..20906(-)	Subtilisin-like serine proteases	3330bp	1109aa	0.6	Yes		COG1404	Subtilisin-like serine proteases	1e-18	[O] Posttranslational modification, protein turnover, chaperones	pfam00082; pfam00395; pfam00395; pfam00395	Peptidase_S8; SLH; SLH; SLH	7.5e-48; 2.0e-11; 4.4e-09; 1.4e-06										CBM56, SLH	GH13,CBM20,CBM34	3.2.1.1,3.2.1.41
2061999434	sg4i_00256820	contig03916	Not Binned	238..966(+)	Di-glucose binding within endoplasmic reticulum.	729bp	242aa	0.6							pfam11721	Malectin	1.3e-32										CBM57
2061990403	sg4i_00166510	contig13485	Not Binned	2..1273(+)	Bacterial Ig-like domain (group 4).	1272bp	424aa	0.63							pfam07532	Big_4	0.00015										CBM57	GH43
2061986488	sg4i_00127360	contig12816	Not Binned	3..287(-)	hypothetical protein	285bp	95aa	0.63																			CBM6	GH43	3.2.1.37,3.2.1.55
2062010649	sg4i_00368970	contig04076	Not Binned	1..2574(+)	Domain of unknown function (DUF1083).	2574bp	857aa	0.68							pfam06452	DUF1083	3e-05										CBM9	CBM9
2062023563	sg4i_00498110	contig20031	Not Binned	1003..2142(+)	Domain of unknown function (DUF1083).	1140bp	379aa	0.68	Yes						pfam06452	DUF1083	5.1e-11										CBM9	CBM9
2062001965	sg4i_00282130	contig02421	Not Binned	234..848(-)	Domain of unknown function (DUF1083).	615bp	204aa	0.63							pfam06452	DUF1083	2e-10										CBM9	CE14,CBM9
2062001966	sg4i_00282140	contig02421	Not Binned	928..1686(-)	Domain of unknown function (DUF1083).	759bp	252aa	0.61							pfam06452	DUF1083	7.5e-16										CBM9	CE14,CBM9
2061977974	sg4i_00042220	contig04359	Not Binned	2..559(+)	Enterochelin esterase and related enzymes	558bp	186aa	0.74	Yes		COG2382	Enterochelin esterase and related enzymes	4e-11	[P] Inorganic ion transport and metabolism	pfam00756	Esterase	1.4e-05										CE1
2061979892	sg4i_00061400	contig01494	Not Binned	212..1045(-)	Predicted hydrolases or acyltransferases (alpha/beta hydrolase superfamily)	834bp	277aa	0.7			COG0596	Predicted hydrolases or acyltransferases (alpha/beta hydrolase superfamily)	4e-18	[R] General function prediction only	pfam00561	Abhydrolase_1	9.4e-23	KO:K08680	2-succinyl-6-hydroxy-2,4-cyclohexadiene-1-carboxylate synthase [EC:4.2.99.20]	1e-100	M00241: Menaquinone biosynthesis, chorismate => menaquinone; M00253: Phylloquinone biosynthesis, chorismate => phylloquinone				4.2.99.20	2-succinyl-6-hydroxy-2,4-cyclohexadiene-1-carboxylate synthase.	CE1
2061981118	sg4i_00073660	contig05605	Not Binned	2..838(+)	Predicted peptidase	837bp	279aa	0.61			COG4099	Predicted peptidase	2e-13	[R] General function prediction only	pfam10503	Esterase_phd	6.7e-07										CE1
2061981286	sg4i_00075340	contig12400	Not Binned	3..455(+)	Predicted peptidase	453bp	151aa	0.65			COG4099	Predicted peptidase	1e-23	[R] General function prediction only	pfam00326	Peptidase_S9	7e-14										CE1
2061983592	sg4i_00098400	contig01522	Not Binned	1026..1871(+)	Predicted hydrolases or acyltransferases (alpha/beta hydrolase superfamily)	846bp	281aa	0.68			COG0596	Predicted hydrolases or acyltransferases (alpha/beta hydrolase superfamily)	2e-17	[R] General function prediction only	pfam00561	Abhydrolase_1	6.7e-18										CE1
2061985219	sg4i_00114670	contig08412	Not Binned	6065..6925(-)	Predicted hydrolases or acyltransferases (alpha/beta hydrolase superfamily)	861bp	286aa	0.61			COG0596	Predicted hydrolases or acyltransferases (alpha/beta hydrolase superfamily)	2e-15	[R] General function prediction only	pfam00561	Abhydrolase_1	1.7e-12										CE1
2061988527	sg4i_00147750	contig13460	Not Binned	3..527(-)	Putative esterase.	525bp	175aa	0.63							pfam00756	Esterase	3.9e-07										CE1
2061990603	sg4i_00168510	contig06337	Not Binned	3..554(-)	homoserine O-acetyltransferase (EC 2.3.1.31)	552bp	184aa	0.64			COG2021	Homoserine acetyltransferase	2e-73	[E] Amino acid transport and metabolism	pfam00561	Abhydrolase_1	8.2e-19					TIGR01392	homoserine O-acetyltransferase	4.6e-54			CE1
2062002813	sg4i_00290610	contig05957	Not Binned	759..1352(+)	Predicted esterase	594bp	198aa	0.76	Yes	Yes	COG0627	Predicted esterase	3e-11	[R] General function prediction only	pfam00756	Esterase	1.8e-15										CE1
2062003849	sg4i_00300970	contig13766	Not Binned	1..762(+)	Predicted hydrolases or acyltransferases (alpha/beta hydrolase superfamily)	762bp	253aa	0.68			COG0596	Predicted hydrolases or acyltransferases (alpha/beta hydrolase superfamily)	4e-18	[R] General function prediction only	pfam00561	Abhydrolase_1	1.1e-16										CE1
2062005353	sg4i_00316010	contig18891	Not Binned	1542..2339(-)	Predicted hydrolases or acyltransferases (alpha/beta hydrolase superfamily)	798bp	265aa	0.6			COG0596	Predicted hydrolases or acyltransferases (alpha/beta hydrolase superfamily)	4e-25	[R] General function prediction only	pfam00561	Abhydrolase_1	5.5e-24										CE1
2062007028	sg4i_00332760	contig07476	Not Binned	3..508(-)	alpha/beta hydrolase fold.	506bp	169aa	0.76	Yes						pfam00561	Abhydrolase_1	1.5e-05										CE1
2062007666	sg4i_00339140	contig13174	Not Binned	3597..4502(-)	Predicted hydrolases or acyltransferases (alpha/beta hydrolase superfamily)	906bp	301aa	0.61			COG0596	Predicted hydrolases or acyltransferases (alpha/beta hydrolase superfamily)	5e-22	[R] General function prediction only	pfam00561	Abhydrolase_1	1.1e-13										CE1
2062008129	sg4i_00343770	contig11452	Not Binned	1217..1762(+)	Predicted esterase	546bp	182aa	0.73	Yes	Yes	COG0627	Predicted esterase	1e-16	[R] General function prediction only	pfam00756	Esterase	1.3e-24										CE1
2062009647	sg4i_00358950	contig01115	Not Binned	2575..3399(+)	Predicted hydrolases or acyltransferases (alpha/beta hydrolase superfamily)	825bp	274aa	0.74			COG0596	Predicted hydrolases or acyltransferases (alpha/beta hydrolase superfamily)	2e-21	[R] General function prediction only	pfam00561	Abhydrolase_1	3.3e-26	KO:K08680	2-succinyl-6-hydroxy-2,4-cyclohexadiene-1-carboxylate synthase [EC:4.2.99.20]		M00241: Menaquinone biosynthesis, chorismate => menaquinone; M00253: Phylloquinone biosynthesis, chorismate => phylloquinone				4.2.99.20	2-succinyl-6-hydroxy-2,4-cyclohexadiene-1-carboxylate synthase.	CE1
2062010779	sg4i_00370270	contig15877	Not Binned	390..1229(+)	homoserine O-acetyltransferase	840bp	280aa	0.67			COG2021	Homoserine acetyltransferase	6e-102	[E] Amino acid transport and metabolism	pfam00561	Abhydrolase_1	1.9e-19	KO:K00641	homoserine O-acetyltransferase [EC:2.3.1.31]		M00052: Methionine biosynthesis, intermediates, homoserine => O-acetylhomoserine => cystathionine; M00053: Methionine biosynthesis, intermediates, homoserine => O-acetylhomoserine => L-homocysteine	TIGR01392	homoserine O-acetyltransferase		2.3.1.31	Homoserine O-acetyltransferase.	CE1
2062013383	sg4i_00396310	contig06458	Not Binned	814..1626(+)	Predicted hydrolases or acyltransferases (alpha/beta hydrolase superfamily)	813bp	270aa	0.67			COG0596	Predicted hydrolases or acyltransferases (alpha/beta hydrolase superfamily)	6e-24	[R] General function prediction only	pfam00561	Abhydrolase_1	2.9e-21										CE1
2062018563	sg4i_00448110	contig16072	Not Binned	386..1462(+)	homoserine O-acetyltransferase	1077bp	358aa	0.67			COG2021	Homoserine acetyltransferase	2e-119	[E] Amino acid transport and metabolism	pfam00561	Abhydrolase_1	8.3e-30	KO:K00641	homoserine O-acetyltransferase [EC:2.3.1.31]		M00052: Methionine biosynthesis, intermediates, homoserine => O-acetylhomoserine => cystathionine; M00053: Methionine biosynthesis, intermediates, homoserine => O-acetylhomoserine => L-homocysteine	TIGR01392	homoserine O-acetyltransferase		2.3.1.31	Homoserine O-acetyltransferase.	CE1
2062019205	sg4i_00454530	contig03337	Not Binned	2..856(+)	Predicted hydrolases or acyltransferases (alpha/beta hydrolase superfamily)	855bp	284aa	0.73	Yes		COG0596	Predicted hydrolases or acyltransferases (alpha/beta hydrolase superfamily)	4e-19	[R] General function prediction only	pfam00561	Abhydrolase_1	9.4e-25	KO:K00433	chloride peroxidase [EC:1.11.1.10]	2e-79					1.11.1.10	Chloride peroxidase.	CE1
2062019347	sg4i_00455950	contig03496	Not Binned	821..1816(+)	Dipeptidyl aminopeptidases/acylaminoacyl-peptidases	996bp	332aa	0.74			COG1506	Dipeptidyl aminopeptidases/acylaminoacyl-peptidases	3e-09	[E] Amino acid transport and metabolism													CE1
2062019791	sg4i_00460390	contig06735	Not Binned	1021..1464(+)	Predicted hydrolases or acyltransferases (alpha/beta hydrolase superfamily)	444bp	148aa	0.73			COG0596	Predicted hydrolases or acyltransferases (alpha/beta hydrolase superfamily)	4e-12	[R] General function prediction only	pfam00561	Abhydrolase_1	2.8e-13										CE1
2062020107	sg4i_00463550	contig04291	Not Binned	7198..8019(-)	Predicted hydrolases or acyltransferases (alpha/beta hydrolase superfamily)	822bp	273aa	0.67			COG0596	Predicted hydrolases or acyltransferases (alpha/beta hydrolase superfamily)	3e-25	[R] General function prediction only	pfam00561	Abhydrolase_1	4.7e-16										CE1
2062020282	sg4i_00465300	contig10232	Not Binned	7425..8402(-)	Dipeptidyl aminopeptidases/acylaminoacyl-peptidases	978bp	325aa	0.65	Yes	Yes	COG1506	Dipeptidyl aminopeptidases/acylaminoacyl-peptidases	1e-14	[E] Amino acid transport and metabolism													CE1
2062022584	sg4i_00488320	contig07984	Not Binned	241..636(-)	Lysophospholipase	396bp	132aa	0.77			COG2267	Lysophospholipase	1e-10	[I] Lipid transport and metabolism													CE1
2062022779	sg4i_00490270	contig19525	Not Binned	730..2316(-)	Predicted hydrolases or acyltransferases (alpha/beta hydrolase superfamily)	1587bp	528aa	0.68		Yes	COG0596	Predicted hydrolases or acyltransferases (alpha/beta hydrolase superfamily)	1e-08	[R] General function prediction only	pfam00561	Abhydrolase_1	3.9e-11										CE1
2062028923	sg4i_00551710	contig19075	Not Binned	959..1465(-)	Predicted hydrolases or acyltransferases (alpha/beta hydrolase superfamily)	507bp	168aa	0.63			COG0596	Predicted hydrolases or acyltransferases (alpha/beta hydrolase superfamily)	1e-12	[R] General function prediction only	pfam00561	Abhydrolase_1	1.3e-11										CE1
2062029870	sg4i_00561180	contig08413	Not Binned	83..490(-)	hypothetical protein	408bp	135aa	0.65																			CE1
2062036057	sg4i_00623050	contig07281	Not Binned	48..455(-)	Dienelactone hydrolase and related enzymes	408bp	135aa	0.73	Yes		COG0412	Dienelactone hydrolase and related enzymes	1e-12	[Q] Secondary metabolites biosynthesis, transport and catabolism	pfam01738	DLH	1.5e-19										CE1
2062037111	sg4i_00633590	contig03651	Not Binned	5009..5794(-)	Predicted hydrolases or acyltransferases (alpha/beta hydrolase superfamily)	786bp	261aa	0.67			COG0596	Predicted hydrolases or acyltransferases (alpha/beta hydrolase superfamily)	2e-21	[R] General function prediction only	pfam00561	Abhydrolase_1	1.2e-14										CE1
2061986371	sg4i_00126190	contig03767	Not Binned	1168..2331(+)	Predicted dienelactone hydrolase	1164bp	388aa	0.7	Yes	Yes	COG4188	Predicted dienelactone hydrolase	4e-07	[R] General function prediction only													CE1	CBM2
2062005146	sg4i_00313940	contig07792	Not Binned	102..679(-)	Poly(3-hydroxybutyrate) depolymerase	578bp	193aa	0.63			COG3509	Poly(3-hydroxybutyrate) depolymerase	1e-26	[Q] Secondary metabolites biosynthesis, transport and catabolism	pfam10503	Esterase_phd	1.6e-06										CE1	CE1
2062003967	sg4i_00302150	contig18380	Not Binned	2374..3186(+)	Predicted esterase	813bp	270aa	0.5			COG0627	Predicted esterase	2e-22	[R] General function prediction only	pfam00756	Esterase	1.2e-13	KO:K03930	putative tributyrin esterase [EC:3.1.1.-]	7e-83					3.1.1.-	Hydrolases. Acting on ester bonds. Carboxylic ester hydrolases.	CE1	CE1	3.1.1.1
2061979711	sg4i_00059590	contig10280	Not Binned	3..500(-)	Dipeptidyl aminopeptidases/acylaminoacyl-peptidases	498bp	166aa	0.77			COG1506	Dipeptidyl aminopeptidases/acylaminoacyl-peptidases	2e-25	[E] Amino acid transport and metabolism	pfam00326	Peptidase_S9	3.9e-21										CE1	CE10
2061995991	sg4i_00222390	contig03090	Not Binned	18..1721(+)	Dipeptidyl aminopeptidases/acylaminoacyl-peptidases	1704bp	567aa	0.69			COG1506	Dipeptidyl aminopeptidases/acylaminoacyl-peptidases	7e-42	[E] Amino acid transport and metabolism	pfam00326; pfam00930	Peptidase_S9; DPPIV_N	6.0e-48; 6.6e-44	KO:K01278	dipeptidyl-peptidase 4 [EC:3.4.14.5]						3.4.14.5	Dipeptidyl-peptidase IV.	CE1	CE10
2062034446	sg4i_00606940	contig13244	Not Binned	1116..3041(-)	Dipeptidyl aminopeptidases/acylaminoacyl-peptidases	1926bp	641aa	0.66			COG1506	Dipeptidyl aminopeptidases/acylaminoacyl-peptidases	2e-36	[E] Amino acid transport and metabolism	pfam00326; pfam00930	Peptidase_S9; DPPIV_N	7.5e-36; 2.5e-58	KO:K01278	dipeptidyl-peptidase 4 [EC:3.4.14.5]						3.4.14.5	Dipeptidyl-peptidase IV.	CE1	CE10
2062033534	sg4i_00597820	contig16631	Not Binned	2..901(+)	Pectinacetylesterase.	900bp	299aa	0.69							pfam03283	PAE	7.3e-27										CE1, CE13	CE13
2062034742	sg4i_00609900	contig13251	Not Binned	218..1012(-)	Dienelactone hydrolase and related enzymes	795bp	264aa	0.67			COG0412	Dienelactone hydrolase and related enzymes	2e-08	[Q] Secondary metabolites biosynthesis, transport and catabolism	pfam00326	Peptidase_S9	2.4e-12										CE1, CE7
2061976537	sg4i_00027850	contig06753	Not Binned	3..526(-)	Dipeptidyl aminopeptidases/acylaminoacyl-peptidases	524bp	174aa	0.64			COG1506	Dipeptidyl aminopeptidases/acylaminoacyl-peptidases	4e-20	[E] Amino acid transport and metabolism	pfam00326	Peptidase_S9	6.9e-14										CE10
2061981914	sg4i_00081620	contig10971	Not Binned	2..1060(-)	Predicted acyl esterases	1059bp	353aa	0.67			COG2936	Predicted acyl esterases	1e-48	[R] General function prediction only	pfam02129	Peptidase_S15	6.9e-51										CE10
2061984049	sg4i_00102970	contig08948	Not Binned	82..474(+)	Esterase/lipase	393bp	131aa	0.8	Yes		COG0657	Esterase/lipase	1e-21	[I] Lipid transport and metabolism	pfam07859	Abhydrolase_3	2.1e-34										CE10
2062010671	sg4i_00369190	contig17448	Not Binned	408..1292(-)	Dipeptidyl aminopeptidases/acylaminoacyl-peptidases	885bp	294aa	0.7	Yes		COG1506	Dipeptidyl aminopeptidases/acylaminoacyl-peptidases	8e-23	[E] Amino acid transport and metabolism	pfam00326	Peptidase_S9	5.7e-11										CE10
2062010961	sg4i_00372090	contig09876	Not Binned	1..1314(-)	X-Pro dipeptidyl-peptidase (S15 family).	1314bp	438aa	0.75							pfam02129	Peptidase_S15	5.8e-06										CE10
2062011856	sg4i_00381040	contig03257	Not Binned	1..885(+)	Prolyl oligopeptidase family.	885bp	294aa	0.75			COG1506	Dipeptidyl aminopeptidases/acylaminoacyl-peptidases	1e-09	[E] Amino acid transport and metabolism	pfam00326	Peptidase_S9	1.9e-08										CE10
2062013393	sg4i_00396410	contig12856	Not Binned	415..2331(+)	prolyl oligopeptidase (EC:3.4.21.26). Serine peptidase. MEROPS family S09A	1917bp	638aa	0.7			COG1505	Serine proteases of the peptidase family S9A	3e-123	[E] Amino acid transport and metabolism	pfam00326; pfam02897	Peptidase_S9; Peptidase_S9_N	1.7e-56; 4.4e-66	KO:K01322	prolyl oligopeptidase [EC:3.4.21.26]						3.4.21.26	Prolyl oligopeptidase.	CE10
2062013484	sg4i_00397320	contig01809	Not Binned	2..409(+)	Dipeptidyl aminopeptidases/acylaminoacyl-peptidases	408bp	135aa	0.62			COG1506	Dipeptidyl aminopeptidases/acylaminoacyl-peptidases	4e-11	[E] Amino acid transport and metabolism	pfam00326	Peptidase_S9	6.7e-08										CE10
2062021696	sg4i_00479440	contig11785	Not Binned	404..1288(-)	Dipeptidyl aminopeptidases/acylaminoacyl-peptidases	885bp	294aa	0.69	Yes		COG1506	Dipeptidyl aminopeptidases/acylaminoacyl-peptidases	3e-22	[E] Amino acid transport and metabolism	pfam00326	Peptidase_S9	3.9e-10										CE10
2062027086	sg4i_00533340	contig20059	Not Binned	718..1599(-)	Dienelactone hydrolase and related enzymes	882bp	293aa	0.61			COG0412	Dienelactone hydrolase and related enzymes	5e-11	[Q] Secondary metabolites biosynthesis, transport and catabolism	pfam02129	Peptidase_S15	1.1e-08										CE10
2062003174	sg4i_00294220	contig20880	Not Binned	1..1335(-)	dipeptidyl-peptidase IV (EC:3.4.14.5). Serine peptidase. MEROPS family S09B	1335bp	445aa	0.67			COG1506	Dipeptidyl aminopeptidases/acylaminoacyl-peptidases	6e-38	[E] Amino acid transport and metabolism	pfam00326; pfam00930	Peptidase_S9; DPPIV_N	3.2e-35; 2.1e-56										CE10	CE10
2062004799	sg4i_00310470	contig19387	Not Binned	3347..4102(-)	dipeptidyl-peptidase IV (EC:3.4.14.5). Serine peptidase. MEROPS family S09B	756bp	251aa	0.65			COG1506	Dipeptidyl aminopeptidases/acylaminoacyl-peptidases	1e-49	[E] Amino acid transport and metabolism	pfam00326	Peptidase_S9	2.7e-62										CE10	CE10
2062023420	sg4i_00496680	contig12994	Not Binned	125..2083(-)	Dipeptidyl aminopeptidases/acylaminoacyl-peptidases	1959bp	652aa	0.69	Yes		COG1506	Dipeptidyl aminopeptidases/acylaminoacyl-peptidases	1e-65	[E] Amino acid transport and metabolism	pfam00326; pfam07676; pfam07676	Peptidase_S9; PD40; PD40	1.7e-48; 6.4e-03; 1.9e-01										CE10	CE10
2062030466	sg4i_00567140	contig20878	Not Binned	1..915(+)	dipeptidyl-peptidase IV (EC:3.4.14.5). Serine peptidase. MEROPS family S09B	915bp	305aa	0.68			COG1506	Dipeptidyl aminopeptidases/acylaminoacyl-peptidases	2e-35	[E] Amino acid transport and metabolism	pfam00326; pfam00930	Peptidase_S9; DPPIV_N	3.9e-34; 3.4e-27										CE10	CE10
2062008815	sg4i_00350630	contig02490	Not Binned	343..1242(-)	Esterase/lipase	900bp	299aa	0.63	Yes	Yes	COG0657	Esterase/lipase	6e-35	[I] Lipid transport and metabolism	pfam07859	Abhydrolase_3	1.9e-42										CE10	CE10	3.1.1.-
2061985215	sg4i_00114630	contig08412	Not Binned	988..2430(-)	Carboxylesterase type B	1443bp	480aa	0.66			COG2272	Carboxylesterase type B	6e-113	[I] Lipid transport and metabolism	pfam00135	COesterase	1.2e-113	KO:K03927	carboxylesterase type B [EC:3.1.1.1]	1e-109					3.1.1.1	Carboxylesterase.	CE10	CE10	3.1.1.1
2062007404	sg4i_00336520	contig11442	Not Binned	834..2381(+)	Carboxylesterase type B	1548bp	515aa	0.71	Yes		COG2272	Carboxylesterase type B	3e-83	[I] Lipid transport and metabolism	pfam00135	COesterase	3.3e-99	KO:K03927; KO:K01046	carboxylesterase type B [EC:3.1.1.1]; triacylglycerol lipase [EC:3.1.1.3]	0.0e+00; 0.0e+00	M00202: Acylglycerol degradation				3.1.1.1; 3.1.1.3	Carboxylesterase.; Triacylglycerol lipase.	CE10	CE10	3.1.1.1
2062007593	sg4i_00338410	contig01825	Not Binned	37..681(+)	Esterase/lipase	645bp	215aa	0.71	Yes		COG0657	Esterase/lipase	2e-16	[I] Lipid transport and metabolism	pfam07859	Abhydrolase_3	7.7e-19										CE10	CE10	3.1.1.6
2061997131	sg4i_00233790	contig01002	Not Binned	625..2352(-)	Dipeptidyl aminopeptidases/acylaminoacyl-peptidases	1728bp	575aa	0.72			COG1506	Dipeptidyl aminopeptidases/acylaminoacyl-peptidases	1e-79	[E] Amino acid transport and metabolism	pfam00326; pfam07676	Peptidase_S9; PD40	2.6e-48; 1.4e-06										CE10	CE10	3.4.19.1
2062004360	sg4i_00306080	contig18883	Not Binned	2710..4677(+)	Dipeptidyl aminopeptidases/acylaminoacyl-peptidases	1968bp	655aa	0.68			COG1506	Dipeptidyl aminopeptidases/acylaminoacyl-peptidases	5e-108	[E] Amino acid transport and metabolism	pfam00326; pfam07676; pfam07676; pfam07676; pfam07676	Peptidase_S9; PD40; PD40; PD40; PD40	2.7e-54; 5.4e-09; 6.4e-03; 1.6e-02; 1.2e-01	KO:K01303	acylaminoacyl-peptidase [EC:3.4.19.1]						3.4.19.1	Acylaminoacyl-peptidase.	CE10	CE10	3.4.19.1
2062008567	sg4i_00348150	contig04038	Not Binned	170..1747(+)	Dipeptidyl aminopeptidases/acylaminoacyl-peptidases	1578bp	526aa	0.74			COG1506	Dipeptidyl aminopeptidases/acylaminoacyl-peptidases	3e-79	[E] Amino acid transport and metabolism	pfam00326; pfam07676	Peptidase_S9; PD40	1.8e-44; 4.3e-07										CE10	CE10	3.4.19.1
2062032036	sg4i_00582840	contig19652	Not Binned	767..3067(-)	Dipeptidyl aminopeptidases/acylaminoacyl-peptidases	2301bp	766aa	0.68	Yes		COG1506	Dipeptidyl aminopeptidases/acylaminoacyl-peptidases	4e-76	[E] Amino acid transport and metabolism	pfam00326; pfam07676; pfam07676; pfam07676	Peptidase_S9; PD40; PD40; PD40	1.7e-43; 3.3e-02; 1.2e-01; 1.5e-01										CE10	CE10	3.4.19.1
2062011502	sg4i_00377500	contig02804	Not Binned	1..1146(+)	UDP-3-O-acyl-N-acetylglucosamine deacetylase	1146bp	381aa	0.68			COG0774	UDP-3-O-acyl-N-acetylglucosamine deacetylase	2e-61	[M] Cell wall/membrane/envelope biogenesis	pfam03331; pfam07977	LpxC; FabA	9.3e-63; 2.4e-20	KO:K02535	UDP-3-O-[3-hydroxymyristoyl] N-acetylglucosamine deacetylase [EC:3.5.1.-]	3e-95	M00114: Lipopolysaccharide biosynthesis, KDO2-lipid A	TIGR00325; TIGR01750	UDP-3-0-acyl N-acetylglucosamine deacetylase; beta-hydroxyacyl-[acyl carrier protein] dehydratase FabZ	2.6e-31; 1.7e-39	3.5.1.-	Hydrolases. Acting on carbon-nitrogen bonds, other than peptide bonds. In linear amides.	CE11	CE11	3.5.1.-
2062003179	sg4i_00294270	contig04590	Not Binned	436..822(-)	hypothetical protein	387bp	128aa	0.66																			CE12
2062021779	sg4i_00480270	contig02630	Not Binned	2744..3535(+)	Lysophospholipase L1 and related esterases	792bp	263aa	0.68	Yes		COG2755	Lysophospholipase L1 and related esterases	3e-17	[E] Amino acid transport and metabolism	pfam00657	Lipase_GDSL	6.6e-14										CE12	CE12	3.1.1.72
2062023974	sg4i_00502220	contig11846	Not Binned	2..667(+)	Pectinacetylesterase.	666bp	221aa	0.69							pfam03283	PAE	2.3e-26										CE13	CE13
2061990748	sg4i_00169960	contig02304	Not Binned	562..1293(+)	Uncharacterized proteins, LmbE homologs	732bp	243aa	0.62			COG2120	Uncharacterized proteins, LmbE homologs	9e-30	[S] Function unknown	pfam02585	PIG-L	5.1e-21										CE14
2062004530	sg4i_00307780	contig02444	Not Binned	2..328(-)	Uncharacterized proteins, LmbE homologs	327bp	109aa	0.67			COG2120	Uncharacterized proteins, LmbE homologs	2e-14	[S] Function unknown	pfam02585	PIG-L	5.3e-15										CE14
2062016600	sg4i_00428480	contig03711	Not Binned	22..519(+)	Uncharacterized proteins, LmbE homologs	498bp	166aa	0.71			COG2120	Uncharacterized proteins, LmbE homologs	8e-14	[S] Function unknown	pfam02585	PIG-L	3.5e-12										CE14
2062019285	sg4i_00455330	contig17028	Not Binned	3..491(+)	Uncharacterized proteins, LmbE homologs	489bp	163aa	0.62			COG2120	Uncharacterized proteins, LmbE homologs	5e-06	[S] Function unknown	pfam02585	PIG-L	1.5e-11										CE14
2062023562	sg4i_00498100	contig20031	Not Binned	3..1016(+)	Uncharacterized proteins, LmbE homologs	1014bp	337aa	0.64			COG2120	Uncharacterized proteins, LmbE homologs	6e-11	[S] Function unknown	pfam02585	PIG-L	1.4e-23										CE14
2062028204	sg4i_00544520	contig16738	Not Binned	41..228(+)	Uncharacterized proteins, LmbE homologs	188bp	63aa	0.67			COG2120	Uncharacterized proteins, LmbE homologs	2e-09	[S] Function unknown	pfam02585	PIG-L	6.7e-10										CE14
2062030291	sg4i_00565390	contig02831	Not Binned	1..342(-)	GlcNAc-PI de-N-acetylase.	342bp	114aa	0.74							pfam02585	PIG-L	4.7e-07										CE14
2062030292	sg4i_00565400	contig02831	Not Binned	273..530(-)	GlcNAc-PI de-N-acetylase.	258bp	85aa	0.75							pfam02585	PIG-L	4.6e-08										CE14
2062033848	sg4i_00600960	contig10851	Not Binned	98..2065(-)	glucosamine-6-phosphate isomerase	1968bp	655aa	0.67			COG0363	6-phosphogluconolactonase/Glucosamine-6-phosphate isomerase/deaminase	1e-53	[G] Carbohydrate transport and metabolism	pfam01182; pfam02585	Glucosamine_iso; PIG-L	1.9e-65; 1.0e-21	KO:K02564	glucosamine-6-phosphate deaminase [EC:3.5.99.6]			TIGR00502	glucosamine-6-phosphate isomerase	4.3e-100	3.5.99.6	Glucosamine-6-phosphate deaminase.	CE14
2061982374	sg4i_00086220	contig20112	Not Binned	2237..2581(+)	Uncharacterized proteins, LmbE homologs	345bp	115aa	0.72			COG2120	Uncharacterized proteins, LmbE homologs	8e-14	[S] Function unknown	pfam02585	PIG-L	2.2e-16										CE14	CE14
2061996544	sg4i_00227920	contig03881	Not Binned	1..747(-)	Uncharacterized proteins, LmbE homologs	747bp	249aa	0.72	Yes		COG2120	Uncharacterized proteins, LmbE homologs	4e-14	[S] Function unknown	pfam02585	PIG-L	1.9e-16										CE14	CE14
2062001166	sg4i_00274140	contig12702	Not Binned	1069..1794(+)	Uncharacterized proteins, LmbE homologs	726bp	241aa	0.67			COG2120	Uncharacterized proteins, LmbE homologs	8e-34	[S] Function unknown	pfam02585	PIG-L	1.1e-34										CE14	CE14
2062003042	sg4i_00292900	contig20374	Not Binned	612..1277(-)	Uncharacterized proteins, LmbE homologs	666bp	221aa	0.72			COG2120	Uncharacterized proteins, LmbE homologs	5e-24	[S] Function unknown	pfam02585	PIG-L	1.6e-24										CE14	CE14
2062007536	sg4i_00337840	contig12782	Not Binned	799..1455(+)	Uncharacterized proteins, LmbE homologs	657bp	218aa	0.66			COG2120	Uncharacterized proteins, LmbE homologs	2e-40	[S] Function unknown	pfam02585	PIG-L	7.3e-30										CE14	CE14
2062011231	sg4i_00374790	contig17473	Not Binned	3..563(+)	Uncharacterized proteins, LmbE homologs	561bp	186aa	0.67			COG2120	Uncharacterized proteins, LmbE homologs	1e-12	[S] Function unknown	pfam02585	PIG-L	8e-06										CE14	CE14
2062017947	sg4i_00441950	contig13667	Not Binned	11..420(-)	Uncharacterized proteins, LmbE homologs	410bp	136aa	0.77			COG2120	Uncharacterized proteins, LmbE homologs	4e-10	[S] Function unknown	pfam02585	PIG-L	6.4e-15										CE14	CE14
2062019875	sg4i_00461230	contig10071	Not Binned	2..393(-)	Uncharacterized proteins, LmbE homologs	392bp	131aa	0.65	Yes		COG2120	Uncharacterized proteins, LmbE homologs	9e-29	[S] Function unknown	pfam02585	PIG-L	8.4e-26										CE14	CE14
2062026217	sg4i_00524650	contig00662	Not Binned	18161..18883(+)	Uncharacterized proteins, LmbE homologs	723bp	240aa	0.62			COG2120	Uncharacterized proteins, LmbE homologs	4e-24	[S] Function unknown	pfam02585	PIG-L	1e-27										CE14	CE14
2062026625	sg4i_00528730	contig20556	Not Binned	634..1365(-)	Uncharacterized proteins, LmbE homologs	732bp	243aa	0.7			COG2120	Uncharacterized proteins, LmbE homologs	2e-24	[S] Function unknown	pfam02585	PIG-L	8.1e-24										CE14	CE14
2062034343	sg4i_00605910	contig18100	Not Binned	634..1332(-)	Uncharacterized proteins, LmbE homologs	699bp	232aa	0.71			COG2120	Uncharacterized proteins, LmbE homologs	4e-24	[S] Function unknown	pfam02585	PIG-L	3.2e-24										CE14	CE14
2062004316	sg4i_00305640	contig02441	Not Binned	2364..3161(-)	Uncharacterized proteins, LmbE homologs	798bp	265aa	0.65			COG2120	Uncharacterized proteins, LmbE homologs	2e-30	[S] Function unknown	pfam02585	PIG-L	9.1e-27										CE14	CE14	3.5.1.-
2062007514	sg4i_00337620	contig01745	Not Binned	161..856(-)	Uncharacterized proteins, LmbE homologs	696bp	231aa	0.66			COG2120	Uncharacterized proteins, LmbE homologs	4e-33	[S] Function unknown	pfam02585	PIG-L	1.3e-31										CE14	CE14	3.5.1.-
2062022749	sg4i_00489970	contig11815	Not Binned	2670..3401(+)	Uncharacterized proteins, LmbE homologs	732bp	244aa	0.7			COG2120	Uncharacterized proteins, LmbE homologs	1e-29	[S] Function unknown	pfam02585	PIG-L	9.8e-22										CE14	CE14	3.5.1.-
2062024630	sg4i_00508780	contig18539	Not Binned	1428..2126(-)	Uncharacterized proteins, LmbE homologs	699bp	232aa	0.64			COG2120	Uncharacterized proteins, LmbE homologs	8e-34	[S] Function unknown	pfam02585	PIG-L	6e-27										CE14	CE14	3.5.1.-
2062026926	sg4i_00531740	contig01278	Not Binned	1..588(-)	Uncharacterized proteins, LmbE homologs	588bp	196aa	0.62			COG2120	Uncharacterized proteins, LmbE homologs	9e-35	[S] Function unknown	pfam02585	PIG-L	2.2e-33										CE14	CE14	3.5.1.-
2061979701	sg4i_00059490	contig02989	Not Binned	1..531(+)	Dipeptidyl aminopeptidases/acylaminoacyl-peptidases	531bp	176aa	0.69	Yes		COG1506	Dipeptidyl aminopeptidases/acylaminoacyl-peptidases	1e-05	[E] Amino acid transport and metabolism	pfam05448	AXE1	3.4e-08										CE15
2062006985	sg4i_00332330	contig18402	Not Binned	11202..12212(-)	Dienelactone hydrolase and related enzymes	1011bp	336aa	0.62			COG0412	Dienelactone hydrolase and related enzymes	1e-09	[Q] Secondary metabolites biosynthesis, transport and catabolism													CE15
2062016993	sg4i_00432410	contig09114	Not Binned	104..460(-)	hypothetical protein	357bp	119aa	0.71	Yes																		CE15
2061981486	sg4i_00077340	contig17437	Not Binned	69..560(+)	Lysophospholipase L1 and related esterases	492bp	164aa	0.67			COG2755	Lysophospholipase L1 and related esterases	4e-17	[E] Amino acid transport and metabolism	pfam00657	Lipase_GDSL	8.8e-08										CE3
2061984408	sg4i_00106560	contig18749	Not Binned	4277..4924(-)	Lysophospholipase L1 and related esterases	648bp	215aa	0.63			COG2755	Lysophospholipase L1 and related esterases	2e-14	[E] Amino acid transport and metabolism	pfam00657	Lipase_GDSL	9.6e-10										CE3
2061994423	sg4i_00206710	contig18314	Not Binned	1506..2327(-)	Lysophospholipase L1 and related esterases	822bp	273aa	0.65	Yes		COG2755	Lysophospholipase L1 and related esterases	1e-15	[E] Amino acid transport and metabolism	pfam00657	Lipase_GDSL	7.9e-21										CE3
2061997255	sg4i_00235030	contig01639	Not Binned	1..1227(+)	Lysophospholipase L1 and related esterases	1227bp	408aa	0.72	Yes		COG2755	Lysophospholipase L1 and related esterases	4e-15	[E] Amino acid transport and metabolism	pfam00657	Lipase_GDSL	3.6e-15										CE3
2061999770	sg4i_00260180	contig03921	Not Binned	61..780(+)	Lysophospholipase L1 and related esterases	720bp	239aa	0.7	Yes		COG2755	Lysophospholipase L1 and related esterases	5e-20	[E] Amino acid transport and metabolism	pfam00657	Lipase_GDSL	3.7e-13										CE3
2062007596	sg4i_00338440	contig07030	Not Binned	95..574(-)	hypothetical protein	480bp	159aa	0.62	Yes																		CE3
2062023151	sg4i_00493990	contig03735	Not Binned	235..543(-)	GDSL-like Lipase/Acylhydrolase.	309bp	102aa	0.72							pfam00657	Lipase_GDSL	3.6e-06										CE3
2062028132	sg4i_00543800	contig10567	Not Binned	1..555(-)	hypothetical protein	555bp	185aa	0.68																			CE3
2061983955	sg4i_00102030	contig03748	Not Binned	196..1134(-)	Polysaccharide deacetylase.	939bp	312aa	0.7							pfam01522	Polysacc_deac_1	1.3e-08										CE4
2061992595	sg4i_00188430	contig08749	Not Binned	506..964(-)	Predicted xylanase/chitin deacetylase	459bp	152aa	0.76			COG0726	Predicted xylanase/chitin deacetylase	6e-10	[G] Carbohydrate transport and metabolism	pfam01522	Polysacc_deac_1	1.1e-15										CE4
2061994314	sg4i_00205620	contig13553	Not Binned	290..1276(+)	Polysaccharide deacetylase.	987bp	329aa	0.61							pfam01522	Polysacc_deac_1	5.9e-06										CE4
2062012113	sg4i_00383610	contig17491	Not Binned	336..1772(+)	hypothetical protein	1437bp	478aa	0.68																			CE4
2062012259	sg4i_00385070	contig06464	Not Binned	3..478(-)	hypothetical protein	476bp	158aa	0.68	Yes																		CE4
2062017942	sg4i_00441900	contig14144	Not Binned	3..274(+)	Polysaccharide deacetylase.	272bp	90aa	0.62							pfam01522	Polysacc_deac_1	2.9e-05										CE4
2062029959	sg4i_00562070	contig04731	Not Binned	14..513(+)	Predicted xylanase/chitin deacetylase	500bp	166aa	0.58	Yes		COG0726	Predicted xylanase/chitin deacetylase	1e-15	[G] Carbohydrate transport and metabolism	pfam01522	Polysacc_deac_1	2.6e-21										CE4
2062030573	sg4i_00568210	contig10066	Not Binned	3..506(+)	Uncharacterized protein conserved in bacteria	504bp	168aa	0.64			COG4878	Uncharacterized protein conserved in bacteria	2e-22	[S] Function unknown	pfam09960; pfam10096	DUF2194; DUF2334	7.2e-49; 1.1e-05										CE4
2062034631	sg4i_00608790	contig12228	Not Binned	649..1785(+)	hypothetical protein	1137bp	378aa	0.68																			CE4
2061977434	sg4i_00036820	contig14925	Not Binned	780..1613(+)	Predicted xylanase/chitin deacetylase	834bp	278aa	0.68	Yes	Yes	COG0726	Predicted xylanase/chitin deacetylase	5e-27	[G] Carbohydrate transport and metabolism	pfam01522	Polysacc_deac_1	1e-25					TIGR02873	probable sporulation protein, polysaccharide deacetylase family	7.2e-69			CE4	CE4
2061989654	sg4i_00159020	contig09818	Not Binned	2..310(-)	Predicted xylanase/chitin deacetylase	309bp	103aa	0.76	Yes		COG0726	Predicted xylanase/chitin deacetylase	4e-13	[G] Carbohydrate transport and metabolism	pfam01522	Polysacc_deac_1	1.3e-14										CE4	CE4
2061997414	sg4i_00236620	contig18335	Not Binned	4068..4940(+)	Predicted xylanase/chitin deacetylase	873bp	290aa	0.61	Yes		COG0726	Predicted xylanase/chitin deacetylase	3e-12	[G] Carbohydrate transport and metabolism	pfam01522	Polysacc_deac_1	2.9e-23										CE4	CE4
2062003960	sg4i_00302080	contig13769	Not Binned	299..1513(-)	Predicted xylanase/chitin deacetylase	1215bp	404aa	0.58	Yes	Yes	COG0726	Predicted xylanase/chitin deacetylase	9e-13	[G] Carbohydrate transport and metabolism	pfam01522	Polysacc_deac_1	1.5e-24										CE4	CE4
2062010351	sg4i_00365990	contig18631	Not Binned	1051..2004(-)	Predicted xylanase/chitin deacetylase	954bp	317aa	0.61	Yes	Yes	COG0726	Predicted xylanase/chitin deacetylase	3e-12	[G] Carbohydrate transport and metabolism	pfam01522	Polysacc_deac_1	1.9e-24										CE4	CE4
2062010354	sg4i_00366020	contig18631	Not Binned	4386..5312(-)	Predicted xylanase/chitin deacetylase	927bp	308aa	0.62			COG0726	Predicted xylanase/chitin deacetylase	3e-14	[G] Carbohydrate transport and metabolism	pfam01522	Polysacc_deac_1	9.4e-25										CE4	CE4
2062010852	sg4i_00371000	contig02506	Not Binned	885..1721(+)	Predicted xylanase/chitin deacetylase	837bp	278aa	0.66			COG0726	Predicted xylanase/chitin deacetylase	8e-21	[G] Carbohydrate transport and metabolism	pfam01522	Polysacc_deac_1	1.3e-23										CE4	CE4
2062018061	sg4i_00443090	contig01373	Not Binned	3896..5077(-)	Predicted xylanase/chitin deacetylase	1182bp	393aa	0.59	Yes		COG0726	Predicted xylanase/chitin deacetylase	1e-14	[G] Carbohydrate transport and metabolism	pfam01522; pfam07833	Polysacc_deac_1; Cu_amine_oxidN1	2.8e-25; 9.3e-05										CE4	CE4
2062024786	sg4i_00510340	contig02025	Not Binned	65..411(+)	Predicted xylanase/chitin deacetylase	347bp	115aa	0.7			COG0726	Predicted xylanase/chitin deacetylase	9e-12	[G] Carbohydrate transport and metabolism													CE4	CE4
2062025968	sg4i_00522160	contig09190	Not Binned	3..475(-)	Predicted xylanase/chitin deacetylase	473bp	157aa	0.6	Yes	Yes	COG0726	Predicted xylanase/chitin deacetylase	8e-23	[G] Carbohydrate transport and metabolism	pfam01522	Polysacc_deac_1	1.3e-25										CE4	CE4
2062027870	sg4i_00541180	contig00675	Not Binned	5963..6769(+)	Predicted xylanase/chitin deacetylase	807bp	268aa	0.6	Yes	Yes	COG0726	Predicted xylanase/chitin deacetylase	2e-27	[G] Carbohydrate transport and metabolism	pfam01522	Polysacc_deac_1	3.3e-27					TIGR02873	probable sporulation protein, polysaccharide deacetylase family	8.8e-72			CE4	CE4
2062031647	sg4i_00578950	contig02090	Not Binned	3..734(-)	Predicted xylanase/chitin deacetylase	732bp	244aa	0.58	Yes		COG0726	Predicted xylanase/chitin deacetylase	4e-17	[G] Carbohydrate transport and metabolism	pfam01522	Polysacc_deac_1	1.1e-31										CE4	CE4
2062035375	sg4i_00616230	contig09879	Not Binned	65..484(-)	Predicted xylanase/chitin deacetylase	420bp	140aa	0.65			COG0726	Predicted xylanase/chitin deacetylase	1e-09	[G] Carbohydrate transport and metabolism	pfam01522	Polysacc_deac_1	3.2e-14										CE4	CE4
2062036181	sg4i_00624290	contig02891	Not Binned	1..882(+)	Predicted xylanase/chitin deacetylase	882bp	293aa	0.67			COG0726	Predicted xylanase/chitin deacetylase	7e-21	[G] Carbohydrate transport and metabolism	pfam01522	Polysacc_deac_1	4.2e-25										CE4	CE4
2061985074	sg4i_00113220	contig13398	Not Binned	1220..2143(-)	Predicted xylanase/chitin deacetylase	924bp	307aa	0.64	Yes		COG0726	Predicted xylanase/chitin deacetylase	3e-34	[G] Carbohydrate transport and metabolism	pfam01522	Polysacc_deac_1	1.1e-35										CE4	CE4	3.1.1.-
2062028846	sg4i_00550940	contig04987	Not Binned	2..637(+)	Predicted xylanase/chitin deacetylase	636bp	211aa	0.61			COG0726	Predicted xylanase/chitin deacetylase	6e-36	[G] Carbohydrate transport and metabolism	pfam01522	Polysacc_deac_1	2.4e-31										CE4	CE4	3.1.1.-
2061989048	sg4i_00152960	contig13145	Not Binned	999..1847(+)	polysaccharide deacetylase family sporulation protein PdaB	849bp	282aa	0.62			COG0726	Predicted xylanase/chitin deacetylase	2e-37	[G] Carbohydrate transport and metabolism	pfam01522	Polysacc_deac_1	8.3e-30					TIGR02764	polysaccharide deacetylase family sporulation protein PdaB	3.1e-117			CE4	CE4	3.5.1.-
2061989279	sg4i_00155270	contig08477	Not Binned	438..959(+)	Predicted xylanase/chitin deacetylase	522bp	174aa	0.63			COG0726	Predicted xylanase/chitin deacetylase	6e-30	[G] Carbohydrate transport and metabolism	pfam01522	Polysacc_deac_1	2.3e-30					TIGR02764	polysaccharide deacetylase family sporulation protein PdaB	1.6e-78			CE4	CE4	3.5.1.-
2061994424	sg4i_00206720	contig18314	Not Binned	2581..3423(+)	Predicted xylanase/chitin deacetylase	843bp	280aa	0.63			COG0726	Predicted xylanase/chitin deacetylase	3e-35	[G] Carbohydrate transport and metabolism	pfam01522	Polysacc_deac_1	7.2e-35	KO:K01452	chitin deacetylase [EC:3.5.1.41]	1e-48					3.5.1.41	Chitin deacetylase.	CE4	CE4	3.5.1.-
2061997068	sg4i_00233160	contig18332	Not Binned	10321..11052(+)	Predicted xylanase/chitin deacetylase	732bp	243aa	0.59			COG0726	Predicted xylanase/chitin deacetylase	3e-27	[G] Carbohydrate transport and metabolism	pfam01522	Polysacc_deac_1	2.2e-28					TIGR02884	delta-lactam-biosynthetic de-N-acetylase	4.3e-65			CE4	CE4	3.5.1.-
2062020113	sg4i_00463610	contig04291	Not Binned	14446..15789(-)	Predicted xylanase/chitin deacetylase	1344bp	447aa	0.65	Yes	Yes	COG0726	Predicted xylanase/chitin deacetylase	1e-30	[G] Carbohydrate transport and metabolism	pfam01522	Polysacc_deac_1	2.4e-26										CE4	CE4	3.5.1.-
2062025829	sg4i_00520770	contig16254	Not Binned	319..1740(-)	Predicted xylanase/chitin deacetylase	1422bp	473aa	0.63	Yes	Yes	COG0726	Predicted xylanase/chitin deacetylase	1e-31	[G] Carbohydrate transport and metabolism	pfam01522	Polysacc_deac_1	1.3e-29										CE4	CE4	3.5.1.-
2062028653	sg4i_00549010	contig07209	Not Binned	2..508(+)	Predicted xylanase/chitin deacetylase	507bp	169aa	0.64			COG0726	Predicted xylanase/chitin deacetylase	2e-26	[G] Carbohydrate transport and metabolism	pfam01522	Polysacc_deac_1	5.3e-35										CE4	CE4	3.5.1.-
2062030819	sg4i_00570670	contig18592	Not Binned	5670..6284(-)	Predicted xylanase/chitin deacetylase	615bp	204aa	0.61			COG0726	Predicted xylanase/chitin deacetylase	2e-35	[G] Carbohydrate transport and metabolism	pfam01522	Polysacc_deac_1	3.8e-34										CE4	CE4	3.5.1.-
2062036225	sg4i_00624730	contig19184	Not Binned	1423..2226(+)	delta-lactam-biosynthetic de-N-acetylase	804bp	267aa	0.64	Yes		COG0726	Predicted xylanase/chitin deacetylase	3e-38	[G] Carbohydrate transport and metabolism	pfam01522	Polysacc_deac_1	3.7e-37					TIGR02884	delta-lactam-biosynthetic de-N-acetylase				CE4	CE4	3.5.1.-
2062024204	sg4i_00504520	contig02757	Not Binned	2..994(+)	Predicted xylanase/chitin deacetylase	993bp	331aa	0.66			COG0726	Predicted xylanase/chitin deacetylase	1e-09	[G] Carbohydrate transport and metabolism	pfam01522	Polysacc_deac_1	1.4e-07										CE4	GH39
2061990000	sg4i_00162480	contig18283	Not Binned	14753..16789(+)	Domain of unknown function (DUF303).	2037bp	678aa	0.6	Yes						pfam02837; pfam03629	Glyco_hydro_2_N; DUF303	2.6e-07; 2.5e-36	KO:K05970	sialate O-acetylesterase [EC:3.1.1.53]						3.1.1.53	Sialate O-acetylesterase.	CE6
2061991738	sg4i_00179860	contig18295	Not Binned	17047..18927(-)	Domain of unknown function (DUF303).	1881bp	626aa	0.66							pfam02837; pfam03629	Glyco_hydro_2_N; DUF303	2.9e-10; 5.2e-32	KO:K05970	sialate O-acetylesterase [EC:3.1.1.53]						3.1.1.53	Sialate O-acetylesterase.	CE6
2062025978	sg4i_00522260	contig04305	Not Binned	20..496(-)	Domain of unknown function (DUF303).	477bp	159aa	0.65							pfam03629	DUF303	1.5e-06										CE6
2062038054	sg4i_00643020	contig14883	Not Binned	3795..5252(-)	Domain of unknown function (DUF303).	1458bp	485aa	0.66							pfam03629	DUF303	3.7e-16										CE6
2061984276	sg4i_00105240	contig18248	Not Binned	25559..26383(-)	Dipeptidyl aminopeptidases/acylaminoacyl-peptidases	825bp	274aa	0.6			COG1506	Dipeptidyl aminopeptidases/acylaminoacyl-peptidases	8e-14	[E] Amino acid transport and metabolism	pfam00326	Peptidase_S9	1.2e-10										CE7
2062026913	sg4i_00531610	contig15092	Not Binned	14..493(+)	X-Pro dipeptidyl-peptidase (S15 family).	480bp	160aa	0.65							pfam02129	Peptidase_S15	2.3e-05										CE7
2062029427	sg4i_00556750	contig04563	Not Binned	2..1033(+)	Acetyl esterase (deacetylase)	1032bp	344aa	0.74	Yes		COG3458	Acetyl esterase (deacetylase)	1e-17	[Q] Secondary metabolites biosynthesis, transport and catabolism	pfam05448	AXE1	7.5e-21										CE7	CE7
2061982400	sg4i_00086480	contig14650	Not Binned	1..497(+)	Acetyl esterase (deacetylase)	497bp	166aa	0.72			COG3458	Acetyl esterase (deacetylase)	7e-51	[Q] Secondary metabolites biosynthesis, transport and catabolism	pfam05448	AXE1	1.1e-59										CE7	CE7	3.1.1.72
2061985940	sg4i_00121880	contig13414	Not Binned	1..750(-)	Acetyl esterase (deacetylase)	750bp	250aa	0.64			COG3458	Acetyl esterase (deacetylase)	2e-69	[Q] Secondary metabolites biosynthesis, transport and catabolism	pfam05448	AXE1	9.8e-82	KO:K01060	cephalosporin-C deacetylase [EC:3.1.1.41]	3e-54					3.1.1.41	Cephalosporin-C deacetylase.	CE7	CE7	3.1.1.72,3.1.1.41
2061997724	sg4i_00239720	contig02059	Not Binned	973..1680(-)	Acetyl esterase (deacetylase)	708bp	235aa	0.63	Yes		COG3458	Acetyl esterase (deacetylase)	4e-70	[Q] Secondary metabolites biosynthesis, transport and catabolism	pfam05448	AXE1	3.6e-87	KO:K01060	cephalosporin-C deacetylase [EC:3.1.1.41]	4e-58					3.1.1.41	Cephalosporin-C deacetylase.	CE7	CE7	3.1.1.72,3.1.1.41
2062003280	sg4i_00295280	contig18376	Not Binned	14450..14944(-)	Acetyl esterase (deacetylase)	495bp	164aa	0.63			COG3458	Acetyl esterase (deacetylase)	5e-52	[Q] Secondary metabolites biosynthesis, transport and catabolism	pfam05448	AXE1	9.3e-64										CE7	CE7	3.1.1.72,3.1.1.41
2062017628	sg4i_00438760	contig15526	Not Binned	3..485(-)	Acetyl esterase (deacetylase)	483bp	161aa	0.62			COG3458	Acetyl esterase (deacetylase)	3e-39	[Q] Secondary metabolites biosynthesis, transport and catabolism	pfam05448	AXE1	2.1e-48										CE7	CE7	3.1.1.72,3.2.1.41
2062008661	sg4i_00349090	contig01104	Not Binned	858..1550(-)	hypothetical protein	693bp	230aa	0.69	Yes	Yes																	CE8
2062021987	sg4i_00482350	contig01228	Not Binned	3089..4564(+)	hypothetical protein	1476bp	491aa	0.67	Yes	Yes																	CE8
2061976160	sg4i_00024080	contig12332	Not Binned	3..1925(+)	Pectin methylesterase	1923bp	640aa	0.67			COG4677	Pectin methylesterase	9e-41	[G] Carbohydrate transport and metabolism	pfam01095; pfam01095	Pectinesterase; Pectinesterase	1.2e-34; 1.5e-07										CE8	CE8	3.1.1.11
2062035035	sg4i_00612830	contig13598	Not Binned	294..902(+)	N-acetylglucosamine-6-phosphate deacetylase	609bp	203aa	0.72			COG1820	N-acetylglucosamine-6-phosphate deacetylase	7e-48	[G] Carbohydrate transport and metabolism	pfam01979	Amidohydro_1	2.3e-07										CE9
2061980007	sg4i_00062550	contig14730	Not Binned	1..696(+)	N-acetylglucosamine 6-phosphate deacetylase (EC 3.5.1.25)	696bp	232aa	0.63			COG1820	N-acetylglucosamine-6-phosphate deacetylase	4e-70	[G] Carbohydrate transport and metabolism													CE9	CE9	3.5.1.25
2061981002	sg4i_00072500	contig02206	Not Binned	3..668(-)	N-acetylglucosamine-6-phosphate deacetylase	666bp	222aa	0.71			COG1820	N-acetylglucosamine-6-phosphate deacetylase	2e-42	[G] Carbohydrate transport and metabolism	pfam01979	Amidohydro_1	8.3e-08										CE9	CE9	3.5.1.25
2061993069	sg4i_00193170	contig03840	Not Binned	1..993(+)	N-acetylglucosamine-6-phosphate deacetylase	993bp	330aa	0.68			COG1820	N-acetylglucosamine-6-phosphate deacetylase	3e-61	[G] Carbohydrate transport and metabolism				KO:K01443	N-acetylglucosamine-6-phosphate deacetylase [EC:3.5.1.25]	1e-81		TIGR00221	N-acetylglucosamine-6-phosphate deacetylase	1.9e-30	3.5.1.25	N-acetylglucosamine-6-phosphate deacetylase.	CE9	CE9	3.5.1.25
2062003970	sg4i_00302180	contig18380	Not Binned	5174..6352(+)	N-acetylglucosamine-6-phosphate deacetylase	1179bp	392aa	0.7			COG1820	N-acetylglucosamine-6-phosphate deacetylase	3e-105	[G] Carbohydrate transport and metabolism	pfam01979	Amidohydro_1	6.4e-18	KO:K01443; KO:K02079	N-acetylglucosamine-6-phosphate deacetylase [EC:3.5.1.25]; N-acetylgalactosamine-6-phosphate deacetylase [EC:3.5.1.25]	3.0e-87; 3.0e-78		TIGR00221	N-acetylglucosamine-6-phosphate deacetylase	1.1e-91	3.5.1.25	N-acetylglucosamine-6-phosphate deacetylase.	CE9	CE9	3.5.1.25
2062024902	sg4i_00511500	contig02669	Not Binned	1..528(+)	N-acetylglucosamine 6-phosphate deacetylase (EC 3.5.1.25)	528bp	175aa	0.68			COG1820	N-acetylglucosamine-6-phosphate deacetylase	7e-53	[G] Carbohydrate transport and metabolism	pfam01979	Amidohydro_1	1.1e-11										CE9	CE9	3.5.1.25
2062025209	sg4i_00514570	contig01943	Not Binned	4527..5723(-)	N-acetylglucosamine 6-phosphate deacetylase (EC 3.5.1.25)	1197bp	398aa	0.64			COG1820	N-acetylglucosamine-6-phosphate deacetylase	1e-110	[G] Carbohydrate transport and metabolism	pfam01979	Amidohydro_1	8.2e-19	KO:K02079; KO:K01443	N-acetylgalactosamine-6-phosphate deacetylase [EC:3.5.1.25]; N-acetylglucosamine-6-phosphate deacetylase [EC:3.5.1.25]	4.0e-80; 2.0e-120		TIGR00221	N-acetylglucosamine-6-phosphate deacetylase	1.5e-97	3.5.1.25	N-acetylglucosamine-6-phosphate deacetylase.	CE9	CE9	3.5.1.25
2062038051	sg4i_00642990	contig14883	Not Binned	2100..3254(+)	N-acetylglucosamine-6-phosphate deacetylase	1155bp	384aa	0.65			COG1820	N-acetylglucosamine-6-phosphate deacetylase	1e-107	[G] Carbohydrate transport and metabolism	pfam01979	Amidohydro_1	8.9e-22	KO:K01443	N-acetylglucosamine-6-phosphate deacetylase [EC:3.5.1.25]	2e-91		TIGR00221	N-acetylglucosamine-6-phosphate deacetylase	2.1e-99	3.5.1.25	N-acetylglucosamine-6-phosphate deacetylase.	CE9	CE9	3.5.1.25
2061984824	sg4i_00110720	contig12483	Not Binned	478..2385(-)	Putative Ig domain.	1908bp	635aa	0.55	Yes						pfam05345	He_PIG	4.8e-06										cohesin
2062020117	sg4i_00463650	contig04291	Not Binned	22439..23425(+)	S-layer homology domain.	987bp	328aa	0.61	Yes						pfam00395; pfam00395; pfam00395	SLH; SLH; SLH	6.5e-12; 2.9e-10; 1.2e-08										cohesin, SLH
2061984544	sg4i_00107920	contig00020	Not Binned	1..546(+)	TonB dependent receptor.	546bp	181aa	0.54							pfam00593	TonB_dep_Rec	1.1e-05										dockerin
2061984825	sg4i_00110730	contig12483	Not Binned	2413..3654(-)	Predicted periplasmic ligand-binding sensor domain	1242bp	413aa	0.59			COG3292	Predicted periplasmic ligand-binding sensor domain	8e-13	[T] Signal transduction mechanisms	pfam07494; pfam07494	Reg_prop; Reg_prop	4.6e-05; 4.9e-03										dockerin
2061997848	sg4i_00240960	contig02379	Not Binned	1571..2293(-)	TonB dependent receptor.	723bp	240aa	0.67							pfam00593	TonB_dep_Rec	3.9e-09										dockerin
2061998786	sg4i_00250340	contig02387	Not Binned	3..2390(-)	Outer membrane receptor proteins, mostly Fe transport	2388bp	796aa	0.67			COG1629	Outer membrane receptor proteins, mostly Fe transport	2e-07	[P] Inorganic ion transport and metabolism	pfam00593; pfam07715	TonB_dep_Rec; Plug	9.4e-19; 7.8e-14										dockerin
2061980390	sg4i_00066380	contig18226	Not Binned	30209..31552(+)	broad-specificity cellobiase (EC 3.2.1.21)	1344bp	447aa	0.6			COG2723	Beta-glucosidase/6-phospho-beta-glucosidase/beta-galactosidase		[G] Carbohydrate transport and metabolism	pfam00232	Glyco_hydro_1		KO:K05350	beta-glucosidase [EC:3.2.1.21]			TIGR03356	beta-galactosidase		3.2.1.21	Beta-glucosidase.	GH1	GH1	3.2.1.21
2061985489	sg4i_00117370	contig06469	Not Binned	4..495(-)	broad-specificity cellobiase (EC 3.2.1.21)	492bp	164aa	0.65			COG2723	Beta-glucosidase/6-phospho-beta-glucosidase/beta-galactosidase	2e-53	[G] Carbohydrate transport and metabolism	pfam00232	Glyco_hydro_1	1.1e-66										GH1	GH1	3.2.1.21
2061990738	sg4i_00169860	contig01578	Not Binned	1..1230(-)	broad-specificity cellobiase (EC 3.2.1.21)	1230bp	410aa	0.62			COG2723	Beta-glucosidase/6-phospho-beta-glucosidase/beta-galactosidase		[G] Carbohydrate transport and metabolism	pfam00232	Glyco_hydro_1		KO:K05350	beta-glucosidase [EC:3.2.1.21]			TIGR03356	beta-galactosidase		3.2.1.21	Beta-glucosidase.	GH1	GH1	3.2.1.21
2061992857	sg4i_00191050	contig12612	Not Binned	2..637(-)	broad-specificity cellobiase (EC 3.2.1.21)	636bp	212aa	0.68			COG2723	Beta-glucosidase/6-phospho-beta-glucosidase/beta-galactosidase	3e-44	[G] Carbohydrate transport and metabolism	pfam00232	Glyco_hydro_1	6.9e-52										GH1	GH1	3.2.1.21
2061992858	sg4i_00191060	contig12612	Not Binned	884..1729(-)	broad-specificity cellobiase (EC 3.2.1.21)	846bp	281aa	0.66			COG2723	Beta-glucosidase/6-phospho-beta-glucosidase/beta-galactosidase	2e-87	[G] Carbohydrate transport and metabolism	pfam00232	Glyco_hydro_1	6.8e-115										GH1	GH1	3.2.1.21
2062002762	sg4i_00290100	contig20876	Not Binned	132..1292(-)	broad-specificity cellobiase (EC 3.2.1.21)	1161bp	386aa	0.68			COG2723	Beta-glucosidase/6-phospho-beta-glucosidase/beta-galactosidase	1e-107	[G] Carbohydrate transport and metabolism	pfam00232	Glyco_hydro_1		KO:K05350	beta-glucosidase [EC:3.2.1.21]			TIGR03356	beta-galactosidase		3.2.1.21	Beta-glucosidase.	GH1	GH1	3.2.1.21
2062030853	sg4i_00571010	contig13520	Not Binned	2..547(+)	Beta-glucosidase/6-phospho-beta-glucosidase/beta-galactosidase	546bp	181aa	0.67	Yes		COG2723	Beta-glucosidase/6-phospho-beta-glucosidase/beta-galactosidase	4e-38	[G] Carbohydrate transport and metabolism	pfam00232	Glyco_hydro_1	1.2e-46										GH1	GH1	3.2.1.21
2062001096	sg4i_00273440	contig03362	Not Binned	79..644(-)	endo-1,4-beta-xylanase (glycosyl hydrolase family 10) (EC 3.2.1.8)	566bp	189aa	0.53			COG3693	Beta-1,4-xylanase	3e-44	[G] Carbohydrate transport and metabolism	pfam00331	Glyco_hydro_10	1.5e-35										GH10	GH10	3.2.1.8
2062019927	sg4i_00461750	contig16103	Not Binned	11348..12352(-)	Beta-1,4-xylanase	1005bp	334aa	0.61	Yes		COG3693	Beta-1,4-xylanase	2e-77	[G] Carbohydrate transport and metabolism	pfam00331	Glyco_hydro_10	1.4e-111	KO:K01181	endo-1,4-beta-xylanase [EC:3.2.1.8]	5e-121					3.2.1.8	Endo-1,4-beta-xylanase.	GH10	GH10	3.2.1.8
2062028998	sg4i_00552460	contig13077	Not Binned	1051..1818(-)	Beta-1,4-xylanase	768bp	255aa	0.69			COG3693	Beta-1,4-xylanase	9e-44	[G] Carbohydrate transport and metabolism	pfam00331; pfam00331	Glyco_hydro_10; Glyco_hydro_10	8.8e-45; 1.5e-15										GH10	GH10	3.2.1.8
2062032442	sg4i_00586900	contig10829	Not Binned	4559..5539(-)	endo-1,4-beta-xylanase (glycosyl hydrolase family 10) (EC 3.2.1.8)	981bp	326aa	0.5			COG3693	Beta-1,4-xylanase	8e-77	[G] Carbohydrate transport and metabolism	pfam00331	Glyco_hydro_10	3e-97	KO:K01181	endo-1,4-beta-xylanase [EC:3.2.1.8]	1e-93					3.2.1.8	Endo-1,4-beta-xylanase.	GH10	GH10	3.2.1.8
2062023869	sg4i_00501170	contig04395	Not Binned	2..1006(-)	Beta-1,4-xylanase	1005bp	335aa	0.67	Yes		COG3693	Beta-1,4-xylanase	3e-70	[G] Carbohydrate transport and metabolism	pfam00331	Glyco_hydro_10	1.2e-102										GH10	GH10,CBM13	3.2.1.8
2061986123	sg4i_00123710	contig17818	Not Binned	1..651(+)	Beta-1,4-xylanase	651bp	216aa	0.58			COG3693	Beta-1,4-xylanase	5e-35	[G] Carbohydrate transport and metabolism	pfam00331	Glyco_hydro_10	2.2e-63										GH10	GH10,CBM22,CBM9	3.2.1.8
2062010286	sg4i_00365340	contig07745	Not Binned	9..476(-)	Beta-1,4-xylanase	468bp	156aa	0.63			COG3693	Beta-1,4-xylanase	1e-15	[G] Carbohydrate transport and metabolism	pfam00331	Glyco_hydro_10	4.2e-27										GH10	GH10,CBM22,CBM9	3.2.1.8
2062006441	sg4i_00326890	contig04191	Not Binned	1..849(+)	Beta-1,4-xylanase	849bp	283aa	0.72			COG3693	Beta-1,4-xylanase	3e-23	[G] Carbohydrate transport and metabolism	pfam00331; pfam02368	Glyco_hydro_10; Big_2	4.9e-31; 7.7e-10										GH10	GH10,CE1,CBM6	3.2.1.8,3.1.1.73
2061982776	sg4i_00090240	contig10984	Not Binned	552..2294(+)	Beta-1,4-xylanase	1743bp	581aa	0.48	Yes	Yes	COG3693	Beta-1,4-xylanase	1e-81	[G] Carbohydrate transport and metabolism	pfam00331; pfam02018	Glyco_hydro_10; CBM_4_9	3.5e-124; 7.2e-29										GH10, CBM22	GH10,CBM22,CBM3	3.2.1.8
2062034645	sg4i_00608930	contig18672	Not Binned	5217..7688(-)	Beta-1,4-xylanase	2472bp	823aa	0.6	Yes		COG3693	Beta-1,4-xylanase	3e-49	[G] Carbohydrate transport and metabolism	pfam00331; pfam02018	Glyco_hydro_10; CBM_4_9	1.4e-51; 6.8e-12										GH10, CBM4	GH10,CBM4	3.2.1.8
2061984380	sg4i_00106280	contig18249	Not Binned	1341..5750(-)	Beta-1,4-xylanase	4410bp	1469aa	0.63	Yes		COG3693	Beta-1,4-xylanase	4e-81	[G] Carbohydrate transport and metabolism	pfam00331; pfam00395; pfam00395; pfam00395; pfam02018; pfam02018; pfam06452; pfam06452	Glyco_hydro_10; SLH; SLH; SLH; CBM_4_9; CBM_4_9; DUF1083; DUF1083	6.9e-120; 2.9e-09; 2.0e-08; 9.3e-08; 8.1e-26; 4.6e-23; 1.4e-53; 9.0e-15										GH10, CBM9, CBM22, SLH	GH10,CBM22,CBM9	3.2.1.8
2061992552	sg4i_00188000	contig08946	Not Binned	12..497(-)	Membrane-bound lytic murein transglycosylase B	486bp	162aa	0.64			COG2951	Membrane-bound lytic murein transglycosylase B	7e-49	[M] Cell wall/membrane/envelope biogenesis													GH103	GH103
2061974098	sg4i_00003460	contig00217	Not Binned	2..604(-)	Predicted unsaturated glucuronyl hydrolase involved in regulation of bacterial surface properties, and related proteins	603bp	201aa	0.63	Yes		COG4225	Predicted unsaturated glucuronyl hydrolase involved in regulation of bacterial surface properties, and related proteins	1e-40	[R] General function prediction only	pfam07470	Glyco_hydro_88	8.4e-42										GH105	GH105	3.2.1.-
2061991732	sg4i_00179800	contig18295	Not Binned	11059..12084(-)	Predicted unsaturated glucuronyl hydrolase involved in regulation of bacterial surface properties, and related proteins	1026bp	341aa	0.6			COG4225	Predicted unsaturated glucuronyl hydrolase involved in regulation of bacterial surface properties, and related proteins	7e-92	[R] General function prediction only	pfam07470	Glyco_hydro_88	1.8e-84										GH105	GH105	3.2.1.-
2061999466	sg4i_00257140	contig15528	Not Binned	14252..15415(-)	Predicted unsaturated glucuronyl hydrolase involved in regulation of bacterial surface properties, and related proteins	1164bp	387aa	0.66			COG4225	Predicted unsaturated glucuronyl hydrolase involved in regulation of bacterial surface properties, and related proteins	1e-93	[R] General function prediction only	pfam07470	Glyco_hydro_88	5.5e-99										GH105	GH105	3.2.1.-
2062000699	sg4i_00269470	contig10568	Not Binned	2..510(-)	Predicted unsaturated glucuronyl hydrolase involved in regulation of bacterial surface properties, and related proteins	509bp	170aa	0.73			COG4225	Predicted unsaturated glucuronyl hydrolase involved in regulation of bacterial surface properties, and related proteins	3e-35	[R] General function prediction only	pfam07470	Glyco_hydro_88	1.8e-36										GH105	GH105	3.2.1.-
2062002666	sg4i_00289140	contig16635	Not Binned	7..723(+)	Predicted unsaturated glucuronyl hydrolase involved in regulation of bacterial surface properties, and related proteins	717bp	239aa	0.64			COG4225	Predicted unsaturated glucuronyl hydrolase involved in regulation of bacterial surface properties, and related proteins	4e-64	[R] General function prediction only	pfam07470	Glyco_hydro_88	9.5e-70										GH105	GH105	3.2.1.-
2062007299	sg4i_00335470	contig15769	Not Binned	826..1860(-)	Predicted unsaturated glucuronyl hydrolase involved in regulation of bacterial surface properties, and related proteins	1035bp	344aa	0.59			COG4225	Predicted unsaturated glucuronyl hydrolase involved in regulation of bacterial surface properties, and related proteins	7e-94	[R] General function prediction only	pfam07470	Glyco_hydro_88	4e-87										GH105	GH105	3.2.1.-
2062011601	sg4i_00378490	contig01787	Not Binned	3..635(+)	Predicted unsaturated glucuronyl hydrolase involved in regulation of bacterial surface properties, and related proteins	633bp	210aa	0.72			COG4225	Predicted unsaturated glucuronyl hydrolase involved in regulation of bacterial surface properties, and related proteins	8e-42	[R] General function prediction only	pfam07470	Glyco_hydro_88	2.9e-42										GH105	GH105	3.2.1.-
2062015915	sg4i_00421630	contig14088	Not Binned	2335..3300(+)	Predicted unsaturated glucuronyl hydrolase involved in regulation of bacterial surface properties, and related proteins	966bp	322aa	0.69			COG4225	Predicted unsaturated glucuronyl hydrolase involved in regulation of bacterial surface properties, and related proteins	5e-73	[R] General function prediction only	pfam07470	Glyco_hydro_88	4.1e-72										GH105	GH105	3.2.1.-
2062033344	sg4i_00595920	contig20662	Not Binned	2..835(+)	Predicted unsaturated glucuronyl hydrolase involved in regulation of bacterial surface properties, and related proteins	834bp	277aa	0.64			COG4225	Predicted unsaturated glucuronyl hydrolase involved in regulation of bacterial surface properties, and related proteins	7e-77	[R] General function prediction only	pfam07470	Glyco_hydro_88	4.5e-87										GH105	GH105	3.2.1.-
2062034978	sg4i_00612260	contig02128	Not Binned	338..1042(+)	Predicted unsaturated glucuronyl hydrolase involved in regulation of bacterial surface properties, and related proteins	705bp	235aa	0.58			COG4225	Predicted unsaturated glucuronyl hydrolase involved in regulation of bacterial surface properties, and related proteins	5e-55	[R] General function prediction only	pfam07470	Glyco_hydro_88	2.7e-54										GH105	GH105	3.2.1.-
2062035119	sg4i_00613670	contig14799	Not Binned	1824..2855(+)	Predicted unsaturated glucuronyl hydrolase involved in regulation of bacterial surface properties, and related proteins	1032bp	343aa	0.66			COG4225	Predicted unsaturated glucuronyl hydrolase involved in regulation of bacterial surface properties, and related proteins	1e-99	[R] General function prediction only	pfam07470	Glyco_hydro_88	6.3e-91										GH105	GH105	3.2.1.-
2062035405	sg4i_00616530	contig02132	Not Binned	3848..4507(+)	Predicted unsaturated glucuronyl hydrolase involved in regulation of bacterial surface properties, and related proteins	660bp	220aa	0.58			COG4225	Predicted unsaturated glucuronyl hydrolase involved in regulation of bacterial surface properties, and related proteins	3e-52	[R] General function prediction only	pfam07470	Glyco_hydro_88	9.8e-51										GH105	GH105	3.2.1.-
2062024454	sg4i_00507020	contig20642	Not Binned	3..785(+)	Predicted unsaturated glucuronyl hydrolase involved in regulation of bacterial surface properties, and related proteins	783bp	260aa	0.65			COG4225	Predicted unsaturated glucuronyl hydrolase involved in regulation of bacterial surface properties, and related proteins	2e-72	[R] General function prediction only	pfam07470	Glyco_hydro_88	4.3e-81										GH105	GH105,GH28	3.2.1.-
2061974298	sg4i_00005460	contig02678	Not Binned	3..902(-)	hypothetical protein	900bp	300aa	0.71	Yes																		GH106	GH106
2061976364	sg4i_00026120	contig00845	Not Binned	1292..2452(+)	Predicted dehydrogenases and related proteins	1161bp	386aa	0.64			COG0673	Predicted dehydrogenases and related proteins	2e-56	[R] General function prediction only	pfam01408; pfam02894	GFO_IDH_MocA; GFO_IDH_MocA_C	1.1e-23; 2.4e-13										GH109
2061977605	sg4i_00038530	contig00850	Not Binned	915..2006(+)	Predicted dehydrogenases and related proteins	1092bp	363aa	0.65	Yes		COG0673	Predicted dehydrogenases and related proteins	3e-45	[R] General function prediction only	pfam01408	GFO_IDH_MocA	7.2e-21										GH109
2061978384	sg4i_00046320	contig10938	Not Binned	340..1365(+)	Predicted dehydrogenases and related proteins	1026bp	341aa	0.66	Yes		COG0673	Predicted dehydrogenases and related proteins	1e-49	[R] General function prediction only	pfam01408; pfam02894	GFO_IDH_MocA; GFO_IDH_MocA_C	6.0e-24; 1.2e-07										GH109
2061978387	sg4i_00046350	contig10938	Not Binned	4147..5127(+)	Predicted dehydrogenases and related proteins	981bp	326aa	0.69			COG0673	Predicted dehydrogenases and related proteins	3e-53	[R] General function prediction only	pfam01408; pfam02894	GFO_IDH_MocA; GFO_IDH_MocA_C	2.0e-29; 9.3e-11	KO:K00010	myo-inositol 2-dehydrogenase [EC:1.1.1.18]						1.1.1.18	Inositol 2-dehydrogenase.	GH109
2061978388	sg4i_00046360	contig10938	Not Binned	5140..5862(+)	Predicted dehydrogenases and related proteins	723bp	241aa	0.71	Yes		COG0673	Predicted dehydrogenases and related proteins	2e-36	[R] General function prediction only	pfam01408; pfam02894	GFO_IDH_MocA; GFO_IDH_MocA_C	9.2e-20; 9.3e-11										GH109
2061978914	sg4i_00051620	contig18217	Not Binned	36944..38230(-)	Predicted dehydrogenases and related proteins	1287bp	428aa	0.63			COG0673	Predicted dehydrogenases and related proteins	2e-35	[R] General function prediction only	pfam01408; pfam02894	GFO_IDH_MocA; GFO_IDH_MocA_C	5.6e-21; 1.2e-16										GH109
2061980331	sg4i_00065790	contig02202	Not Binned	1348..1503(+)	NADP oxidoreductase coenzyme F420-dependent.	156bp	52aa	0.8	Yes						pfam03807	F420_oxidored	2.1e-06										GH109
2061982318	sg4i_00085660	contig02046	Not Binned	866..2731(-)	Trehalose utilization protein	1866bp	621aa	0.59			COG4813	Trehalose utilization protein	7e-85	[G] Carbohydrate transport and metabolism	pfam01408; pfam02894; pfam06283	GFO_IDH_MocA; GFO_IDH_MocA_C; ThuA	5.7e-23; 6.0e-11; 5.1e-46										GH109
2061982618	sg4i_00088660	contig03738	Not Binned	2063..2617(+)	Predicted dehydrogenases and related proteins	555bp	185aa	0.7			COG0673	Predicted dehydrogenases and related proteins	3e-39	[R] General function prediction only	pfam01408	GFO_IDH_MocA	1.8e-31										GH109
2061984384	sg4i_00106320	contig18249	Not Binned	10808..11974(+)	Predicted dehydrogenases and related proteins	1167bp	388aa	0.63			COG0673	Predicted dehydrogenases and related proteins	5e-49	[R] General function prediction only	pfam01408; pfam02894	GFO_IDH_MocA; GFO_IDH_MocA_C	1.8e-18; 1.4e-09										GH109
2061987782	sg4i_00140300	contig15170	Not Binned	83..1240(-)	Predicted dehydrogenases and related proteins	1158bp	385aa	0.65	Yes		COG0673	Predicted dehydrogenases and related proteins	8e-55	[R] General function prediction only	pfam01408; pfam02894	GFO_IDH_MocA; GFO_IDH_MocA_C	7.9e-30; 3.0e-12										GH109
2061991180	sg4i_00174280	contig08800	Not Binned	102..698(+)	Predicted dehydrogenases and related proteins	597bp	199aa	0.57			COG0673	Predicted dehydrogenases and related proteins	9e-32	[R] General function prediction only	pfam01408	GFO_IDH_MocA	2.1e-22										GH109
2061991861	sg4i_00181090	contig15313	Not Binned	3295..3771(+)	Predicted dehydrogenases and related proteins	477bp	159aa	0.56			COG0673	Predicted dehydrogenases and related proteins	2e-18	[R] General function prediction only	pfam01408	GFO_IDH_MocA	1.4e-19										GH109
2061993288	sg4i_00195360	contig05579	Not Binned	3..974(-)	Predicted dehydrogenases and related proteins	972bp	324aa	0.7			COG0673	Predicted dehydrogenases and related proteins	6e-57	[R] General function prediction only	pfam01408; pfam02894	GFO_IDH_MocA; GFO_IDH_MocA_C	4.0e-27; 8.5e-08										GH109
2061993663	sg4i_00199110	contig08805	Not Binned	712..1056(+)	Predicted dehydrogenases and related proteins	345bp	115aa	0.55			COG0673	Predicted dehydrogenases and related proteins	1e-21	[R] General function prediction only	pfam01408	GFO_IDH_MocA	7.5e-23										GH109
2061994040	sg4i_00202880	contig00382	Not Binned	2995..4020(-)	myo-inositol 2-dehydrogenase (EC 1.1.1.18)	1026bp	341aa	0.61			COG0673	Predicted dehydrogenases and related proteins	5e-60	[R] General function prediction only	pfam01408; pfam02894	GFO_IDH_MocA; GFO_IDH_MocA_C	7.0e-26; 2.3e-09	KO:K00010	myo-inositol 2-dehydrogenase [EC:1.1.1.18]	5e-125					1.1.1.18	Inositol 2-dehydrogenase.	GH109
2061994537	sg4i_00207850	contig11180	Not Binned	1..999(+)	Predicted dehydrogenases and related proteins	999bp	332aa	0.64	Yes		COG0673	Predicted dehydrogenases and related proteins	7e-57	[R] General function prediction only	pfam01408; pfam02894	GFO_IDH_MocA; GFO_IDH_MocA_C	4.0e-32; 9.8e-08	KO:K00010	myo-inositol 2-dehydrogenase [EC:1.1.1.18]	2e-69					1.1.1.18	Inositol 2-dehydrogenase.	GH109
2061995185	sg4i_00214330	contig03342	Not Binned	3..502(+)	Predicted dehydrogenases and related proteins	500bp	167aa	0.64			COG0673	Predicted dehydrogenases and related proteins	2e-27	[R] General function prediction only	pfam01408; pfam02894	GFO_IDH_MocA; GFO_IDH_MocA_C	1.2e-14; 3.6e-18										GH109
2061995366	sg4i_00216140	contig01062	Not Binned	278..499(+)	Predicted dehydrogenases and related proteins	222bp	74aa	0.63			COG0673	Predicted dehydrogenases and related proteins	7e-09	[R] General function prediction only	pfam01408	GFO_IDH_MocA	4.4e-14										GH109
2061997372	sg4i_00236200	contig01640	Not Binned	644..1687(+)	Predicted dehydrogenases and related proteins	1044bp	347aa	0.65	Yes		COG0673	Predicted dehydrogenases and related proteins	5e-58	[R] General function prediction only	pfam01408; pfam02894	GFO_IDH_MocA; GFO_IDH_MocA_C	1.6e-33; 2.7e-16										GH109
2062000079	sg4i_00263270	contig14363	Not Binned	226..501(+)	Predicted dehydrogenases and related proteins	276bp	92aa	0.63			COG0673	Predicted dehydrogenases and related proteins	4e-07	[R] General function prediction only	pfam01408	GFO_IDH_MocA	9.1e-07										GH109
2062001793	sg4i_00280410	contig19365	Not Binned	266..1183(+)	Predicted dehydrogenases and related proteins	918bp	305aa	0.68			COG0673	Predicted dehydrogenases and related proteins	4e-51	[R] General function prediction only	pfam01408; pfam02894	GFO_IDH_MocA; GFO_IDH_MocA_C	8.5e-28; 5.9e-07										GH109
2062003566	sg4i_00298140	contig03551	Not Binned	3..1028(+)	Predicted dehydrogenases and related proteins	1026bp	341aa	0.67			COG0673	Predicted dehydrogenases and related proteins	3e-55	[R] General function prediction only	pfam01408; pfam02894	GFO_IDH_MocA; GFO_IDH_MocA_C	1.1e-24; 2.6e-12										GH109
2062005584	sg4i_00318320	contig18393	Not Binned	10526..11599(+)	Predicted dehydrogenases and related proteins	1074bp	357aa	0.65			COG0673	Predicted dehydrogenases and related proteins	2e-53	[R] General function prediction only	pfam01408; pfam02894	GFO_IDH_MocA; GFO_IDH_MocA_C	9.5e-32; 1.2e-12										GH109
2062007049	sg4i_00332970	contig01089	Not Binned	1620..2720(-)	Predicted dehydrogenases and related proteins	1101bp	366aa	0.67			COG0673	Predicted dehydrogenases and related proteins	1e-44	[R] General function prediction only	pfam01408	GFO_IDH_MocA	1.1e-20										GH109
2062007668	sg4i_00339160	contig13174	Not Binned	5436..6554(-)	Predicted dehydrogenases and related proteins	1119bp	372aa	0.62			COG0673	Predicted dehydrogenases and related proteins	9e-45	[R] General function prediction only	pfam01408	GFO_IDH_MocA	4e-24										GH109
2062008311	sg4i_00345590	contig03662	Not Binned	2..877(+)	Predicted dehydrogenases and related proteins	876bp	292aa	0.68			COG0673	Predicted dehydrogenases and related proteins	6e-20	[R] General function prediction only	pfam01408	GFO_IDH_MocA	3.8e-14										GH109
2062008548	sg4i_00347960	contig12508	Not Binned	2..291(-)	Saccharopine dehydrogenase and related proteins	290bp	96aa	0.63	Yes		COG1748	Saccharopine dehydrogenase and related proteins	7e-12	[E] Amino acid transport and metabolism	pfam03435	Saccharop_dh	3.8e-17										GH109
2062008823	sg4i_00350710	contig06203	Not Binned	32..1027(-)	Predicted dehydrogenases and related proteins	996bp	331aa	0.64			COG0673	Predicted dehydrogenases and related proteins	3e-43	[R] General function prediction only	pfam01408; pfam02894	GFO_IDH_MocA; GFO_IDH_MocA_C	1.1e-23; 1.6e-07										GH109
2062009724	sg4i_00359720	contig07450	Not Binned	258..626(-)	Predicted dehydrogenases and related proteins	369bp	123aa	0.68			COG0673	Predicted dehydrogenases and related proteins	1e-17	[R] General function prediction only	pfam01408	GFO_IDH_MocA	4.2e-23										GH109
2062009777	sg4i_00360250	contig03234	Not Binned	491..1732(-)	Predicted dehydrogenases and related proteins	1242bp	413aa	0.69			COG0673	Predicted dehydrogenases and related proteins	2e-30	[R] General function prediction only	pfam01408	GFO_IDH_MocA	2.8e-18										GH109
2062012159	sg4i_00384070	contig14338	Not Binned	3..710(-)	Predicted dehydrogenases and related proteins	708bp	236aa	0.67	Yes		COG0673	Predicted dehydrogenases and related proteins	1e-33	[R] General function prediction only	pfam01408; pfam02894	GFO_IDH_MocA; GFO_IDH_MocA_C	5.4e-10; 9.7e-11										GH109
2062012985	sg4i_00392330	contig15699	Not Binned	1..507(+)	Predicted dehydrogenases and related proteins	507bp	169aa	0.67			COG0673	Predicted dehydrogenases and related proteins	6e-27	[R] General function prediction only	pfam01408; pfam02894	GFO_IDH_MocA; GFO_IDH_MocA_C	9.0e-09; 6.3e-14										GH109
2062014923	sg4i_00411710	contig19463	Not Binned	1281..2426(-)	Predicted dehydrogenases and related proteins	1146bp	381aa	0.65			COG0673	Predicted dehydrogenases and related proteins	2e-58	[R] General function prediction only	pfam01408; pfam02894	GFO_IDH_MocA; GFO_IDH_MocA_C	1.2e-25; 1.9e-09										GH109
2062017009	sg4i_00432570	contig01183	Not Binned	5132..6124(+)	Predicted dehydrogenases and related proteins	993bp	330aa	0.64			COG0673	Predicted dehydrogenases and related proteins	3e-52	[R] General function prediction only	pfam01408; pfam02894	GFO_IDH_MocA; GFO_IDH_MocA_C	2.8e-25; 7.4e-08	KO:K00010	myo-inositol 2-dehydrogenase [EC:1.1.1.18]	3e-32					1.1.1.18	Inositol 2-dehydrogenase.	GH109
2062018337	sg4i_00445850	contig11696	Not Binned	3..746(-)	myo-inositol 2-dehydrogenase (EC 1.1.1.18)	744bp	248aa	0.61			COG0673	Predicted dehydrogenases and related proteins	2e-44	[R] General function prediction only	pfam01408; pfam02894	GFO_IDH_MocA; GFO_IDH_MocA_C	1.1e-25; 6.5e-12	KO:K00010	myo-inositol 2-dehydrogenase [EC:1.1.1.18]	2e-80					1.1.1.18	Inositol 2-dehydrogenase.	GH109
2062018560	sg4i_00448080	contig14153	Not Binned	1392..2432(-)	Predicted dehydrogenases and related proteins	1041bp	346aa	0.67			COG0673	Predicted dehydrogenases and related proteins	1e-53	[R] General function prediction only	pfam01408; pfam02894	GFO_IDH_MocA; GFO_IDH_MocA_C	1.0e-29; 1.9e-06										GH109
2062020097	sg4i_00463450	contig03352	Not Binned	809..1963(-)	Predicted dehydrogenases and related proteins	1155bp	384aa	0.7			COG0673	Predicted dehydrogenases and related proteins	9e-43	[R] General function prediction only	pfam01408; pfam02894	GFO_IDH_MocA; GFO_IDH_MocA_C	4.7e-24; 4.8e-07										GH109
2062022486	sg4i_00487340	contig09626	Not Binned	20..577(-)	myo-inositol 2-dehydrogenase (EC 1.1.1.18)	558bp	186aa	0.59			COG0673	Predicted dehydrogenases and related proteins	2e-34	[R] General function prediction only	pfam01408	GFO_IDH_MocA	9.2e-29										GH109
2062023146	sg4i_00493940	contig05546	Not Binned	3..623(-)	Predicted dehydrogenases and related proteins	621bp	207aa	0.68			COG0673	Predicted dehydrogenases and related proteins	3e-23	[R] General function prediction only	pfam01408	GFO_IDH_MocA	2.6e-18										GH109
2062026135	sg4i_00523830	contig03426	Not Binned	821..1345(+)	Predicted dehydrogenases and related proteins	525bp	175aa	0.7			COG0673	Predicted dehydrogenases and related proteins	4e-27	[R] General function prediction only	pfam01408	GFO_IDH_MocA	1.8e-20										GH109
2062028414	sg4i_00546620	contig10220	Not Binned	1..975(+)	Predicted dehydrogenases and related proteins	975bp	324aa	0.65			COG0673	Predicted dehydrogenases and related proteins	2e-49	[R] General function prediction only	pfam01408; pfam02894	GFO_IDH_MocA; GFO_IDH_MocA_C	2.6e-16; 3.3e-13										GH109
2062030692	sg4i_00569400	contig04614	Not Binned	245..1225(+)	myo-inositol 2-dehydrogenase (EC 1.1.1.18)	981bp	326aa	0.6			COG0673	Predicted dehydrogenases and related proteins	2e-55	[R] General function prediction only	pfam01408; pfam02894	GFO_IDH_MocA; GFO_IDH_MocA_C	1.1e-28; 1.9e-10	KO:K00010	myo-inositol 2-dehydrogenase [EC:1.1.1.18]	3e-104					1.1.1.18	Inositol 2-dehydrogenase.	GH109
2062031321	sg4i_00575690	contig03331	Not Binned	4..525(+)	Predicted dehydrogenases and related proteins	522bp	174aa	0.67			COG0673	Predicted dehydrogenases and related proteins	3e-21	[R] General function prediction only	pfam01408	GFO_IDH_MocA	7e-16										GH109
2062032397	sg4i_00586450	contig04103	Not Binned	18..626(-)	Predicted dehydrogenases and related proteins	609bp	203aa	0.66			COG0673	Predicted dehydrogenases and related proteins	5e-44	[R] General function prediction only	pfam01408; pfam02894	GFO_IDH_MocA; GFO_IDH_MocA_C	8.0e-23; 4.9e-08										GH109
2062033397	sg4i_00596450	contig02109	Not Binned	3121..3399(-)	Predicted dehydrogenases and related proteins	279bp	92aa	0.71	Yes		COG0673	Predicted dehydrogenases and related proteins	6e-12	[R] General function prediction only	pfam01408	GFO_IDH_MocA	4.6e-14										GH109
2062034103	sg4i_00603510	contig19168	Not Binned	669..1826(-)	Predicted dehydrogenases and related proteins	1158bp	385aa	0.57	Yes		COG0673	Predicted dehydrogenases and related proteins	2e-28	[R] General function prediction only	pfam01408	GFO_IDH_MocA	5.6e-18										GH109
2062034390	sg4i_00606380	contig14236	Not Binned	6..502(-)	myo-inositol 2-dehydrogenase (EC 1.1.1.18)	497bp	166aa	0.59			COG0673	Predicted dehydrogenases and related proteins	4e-30	[R] General function prediction only	pfam01408; pfam02894	GFO_IDH_MocA; GFO_IDH_MocA_C	5.9e-13; 5.2e-10										GH109
2062034993	sg4i_00612410	contig13253	Not Binned	60..1406(-)	Predicted dehydrogenases and related proteins	1347bp	448aa	0.69	Yes		COG0673	Predicted dehydrogenases and related proteins	2e-40	[R] General function prediction only	pfam01408; pfam02894	GFO_IDH_MocA; GFO_IDH_MocA_C	8.8e-25; 1.0e-02										GH109
2062038239	sg4i_00644870	contig01456	Not Binned	838..2136(-)	Predicted dehydrogenases and related proteins	1299bp	432aa	0.63	Yes		COG0673	Predicted dehydrogenases and related proteins	6e-31	[R] General function prediction only	pfam01408; pfam02894	GFO_IDH_MocA; GFO_IDH_MocA_C	5.4e-19; 1.8e-25										GH109
2061996430	sg4i_00226780	contig03879	Not Binned	1423..2751(+)	Predicted dehydrogenases and related proteins	1329bp	442aa	0.68	Yes		COG0673	Predicted dehydrogenases and related proteins	9e-32	[R] General function prediction only	pfam01408	GFO_IDH_MocA	8.5e-13					TIGR01409	Tat (twin-arginine translocation) pathway signal sequence	5.7e-07			GH109	GH0	3.2.1.18
2062031653	sg4i_00579010	contig03587	Not Binned	2..1231(+)	Predicted dehydrogenases and related proteins	1230bp	409aa	0.67			COG0673	Predicted dehydrogenases and related proteins	2e-20	[R] General function prediction only	pfam01408	GFO_IDH_MocA	6.6e-17										GH109	GH109	3.2.1.49
2062032691	sg4i_00589390	contig19104	Not Binned	237..1208(+)	Predicted dehydrogenases and related proteins	972bp	323aa	0.63			COG0673	Predicted dehydrogenases and related proteins	2e-44	[R] General function prediction only	pfam01408; pfam02894	GFO_IDH_MocA; GFO_IDH_MocA_C	7.3e-24; 1.3e-09										GH109	GT4
2062015979	sg4i_00422270	contig01174	Not Binned	644..1933(+)	urea-binding protein	1290bp	429aa	0.59	Yes	Yes	COG0683	ABC-type branched-chain amino acid transport systems, periplasmic component	8e-72	[E] Amino acid transport and metabolism	pfam01094	ANF_receptor	3.6e-10	KO:K01999	branched-chain amino acid transport system substrate-binding protein		M00367: Branched-chain amino acid transport system	TIGR03407	urea ABC transporter, urea binding protein				GH11
2062008802	sg4i_00350500	contig00496	Not Binned	4756..5820(+)	Carbohydrate binding module (family 6)./Glycosyl hydrolases family 11.	1065bp	354aa	0.58	Yes						pfam00457; pfam03422	Glyco_hydro_11; CBM_6	3.3e-75; 6.7e-12										GH11, CBM36	GH11,CBM36	3.2.1.8
2061987262	sg4i_00135100	contig13144	Not Binned	3..1616(-)	hypothetical protein	1614bp	538aa	0.64																			GH115
2061992829	sg4i_00190770	contig00371	Not Binned	22538..25774(-)	hypothetical protein	3237bp	1078aa	0.65																			GH115
2062005447	sg4i_00316950	contig15718	Not Binned	2369..4429(-)	hypothetical protein	2061bp	686aa	0.62																			GH115
2062011274	sg4i_00375220	contig04502	Not Binned	3..284(+)	hypothetical protein	282bp	94aa	0.7																			GH117
2061990001	sg4i_00162490	contig18283	Not Binned	16865..17650(+)	Glycosyl hydrolase family 12.	786bp	261aa	0.65	Yes						pfam01670	Glyco_hydro_12	2.8e-50										GH12	GH12	3.2.1.4
2062005642	sg4i_00318900	contig03191	Not Binned	728..1330(-)	hypothetical protein	603bp	200aa	0.61	Yes																		GH120	GH0
2061997853	sg4i_00241010	contig03898	Not Binned	1264..1992(-)	hypothetical protein	729bp	242aa	0.72																			GH123
2061984102	sg4i_00103500	contig01341	Not Binned	51..1880(+)	Uncharacterized protein conserved in bacteria	1830bp	609aa	0.63			COG3533	Uncharacterized protein conserved in bacteria	6e-129	[S] Function unknown	pfam07944	DUF1680		KO:K09955	hypothetical protein								GH127
2061993907	sg4i_00201550	contig00973	Not Binned	291..2696(+)	Uncharacterized protein conserved in bacteria	2406bp	801aa	0.68	Yes		COG3533	Uncharacterized protein conserved in bacteria	6e-88	[S] Function unknown	pfam07944	DUF1680	3.2e-121	KO:K09955	hypothetical protein								GH127
2062028180	sg4i_00544280	contig13410	Not Binned	220..801(-)	hypothetical protein	582bp	193aa	0.75	Yes																		GH128
2062009550	sg4i_00357980	contig01114	Not Binned	139..1854(+)	Glycosyl hydrolase catalytic core.	1716bp	571aa	0.66	Yes						pfam11790	Glyco_hydro_cc	1.9e-09										GH128	GH0
2062017452	sg4i_00437000	contig10153	Not Binned	498..2066(+)	Glycosidases	1569bp	522aa	0.67	Yes		COG0366	Glycosidases	5e-13	[G] Carbohydrate transport and metabolism	pfam00128	Alpha-amylase	2e-10										GH13	GH13
2062029294	sg4i_00555420	contig08377	Not Binned	1..489(+)	Glycosidases	489bp	163aa	0.64			COG0366	Glycosidases	4e-07	[G] Carbohydrate transport and metabolism													GH13	GH13	2.4.1.7
2062007158	sg4i_00334060	contig00484	Not Binned	6835..8415(+)	Glycosidases	1581bp	526aa	0.62	Yes		COG0366	Glycosidases	6e-80	[G] Carbohydrate transport and metabolism	pfam00128	Alpha-amylase	1.8e-89										GH13	GH13	3.2.1.1
2062031460	sg4i_00577080	contig14549	Not Binned	1..1458(-)	Glycosidases	1458bp	486aa	0.62			COG0366	Glycosidases	4e-108	[G] Carbohydrate transport and metabolism	pfam00128	Alpha-amylase	2.5e-113	KO:K01182	oligo-1,6-glucosidase [EC:3.2.1.10]						3.2.1.10	Oligo-1,6-glucosidase.	GH13	GH13	3.2.1.10
2061986745	sg4i_00129930	contig20765	Not Binned	62..1774(+)	Glycosidases	1713bp	570aa	0.68			COG0366	Glycosidases	4e-50	[G] Carbohydrate transport and metabolism	pfam00128	Alpha-amylase	7e-52	KO:K01187	alpha-glucosidase [EC:3.2.1.20]						3.2.1.20	Alpha-glucosidase.	GH13	GH13	3.2.1.20
2061999238	sg4i_00254860	contig12626	Not Binned	2..553(+)	Glycosidases	552bp	184aa	0.61			COG0366	Glycosidases	2e-19	[G] Carbohydrate transport and metabolism	pfam00128	Alpha-amylase	4.5e-19										GH13	GH13	3.2.1.20
2062001173	sg4i_00274210	contig15579	Not Binned	923..2524(-)	Glycosidases	1602bp	533aa	0.66			COG0366	Glycosidases	1e-99	[G] Carbohydrate transport and metabolism	pfam00128	Alpha-amylase	1.6e-91	KO:K01187	alpha-glucosidase [EC:3.2.1.20]						3.2.1.20	Alpha-glucosidase.	GH13	GH13	3.2.1.20
2062014555	sg4i_00408030	contig17535	Not Binned	11..796(-)	Glycosidases	786bp	261aa	0.59			COG0366	Glycosidases	7e-58	[G] Carbohydrate transport and metabolism	pfam00128	Alpha-amylase	2.1e-73										GH13	GH13	3.2.1.20
2062023244	sg4i_00494920	contig04474	Not Binned	6..515(-)	Glycosidases	510bp	170aa	0.71			COG0366	Glycosidases	1e-16	[G] Carbohydrate transport and metabolism	pfam00128	Alpha-amylase	1.2e-19										GH13	GH13	3.2.1.20
2062033515	sg4i_00597630	contig03609	Not Binned	1..1134(-)	Glycosidases	1134bp	378aa	0.7			COG0366	Glycosidases	1e-54	[G] Carbohydrate transport and metabolism	pfam00128	Alpha-amylase	4.6e-39	KO:K01187	alpha-glucosidase [EC:3.2.1.20]						3.2.1.20	Alpha-glucosidase.	GH13	GH13	3.2.1.28,3.2.1.20
2062017453	sg4i_00437010	contig10153	Not Binned	2083..3582(+)	trehalose synthase (EC:5.4.99.16)	1500bp	499aa	0.65			COG0366	Glycosidases	2e-77	[G] Carbohydrate transport and metabolism	pfam00128	Alpha-amylase	1.1e-69					TIGR02456	trehalose synthase				GH13	GH13	5.4.99.16
2062027845	sg4i_00540930	contig05167	Not Binned	3..623(+)	Glycosidases	621bp	207aa	0.66			COG0366	Glycosidases	1e-52	[G] Carbohydrate transport and metabolism	pfam00128	Alpha-amylase	1.9e-60										GH13	GH13	5.4.99.16
2062019006	sg4i_00452540	contig12937	Not Binned	75..1037(-)	glycogen branching enzyme (EC 2.4.1.18)	963bp	320aa	0.67			COG0296	1,4-alpha-glucan branching enzyme	3e-109	[G] Carbohydrate transport and metabolism	pfam02806	Alpha-amylase_C	5.3e-22					TIGR01515	alpha-1,4-glucan:alpha-1,4-glucan 6-glycosyltransferase	4.4e-92			GH13	GH13,CBM48	2.4.1.18
2062023926	sg4i_00501740	contig04689	Not Binned	1..567(+)	maltooligosyl trehalose hydrolase (EC 3.2.1.141)	567bp	189aa	0.7			COG0296	1,4-alpha-glucan branching enzyme	1e-49	[G] Carbohydrate transport and metabolism	pfam00128	Alpha-amylase	4.2e-11										GH13	GH13,CBM48	3.2.1.141
2062019641	sg4i_00458890	contig17504	Not Binned	1..864(+)	Type II secretory pathway, pullulanase PulA and related glycosidases	864bp	288aa	0.64			COG1523	Type II secretory pathway, pullulanase PulA and related glycosidases	9e-111	[G] Carbohydrate transport and metabolism													GH13	GH13,CBM48	3.2.1.68
2061978901	sg4i_00051490	contig18217	Not Binned	22319..24958(-)	F5/8 type C domain.	2640bp	879aa	0.62							pfam00754	F5_F8_type_C	4.7e-19										GH13, CBM32	GH87,CBM32	3.2.1.59
2062006259	sg4i_00325070	contig06700	Not Binned	1..912(+)	Glycosidases	912bp	304aa	0.64			COG0366	Glycosidases	4e-41	[G] Carbohydrate transport and metabolism	pfam00128; pfam02903	Alpha-amylase; Alpha-amylase_N	3.3e-56; 7.0e-17										GH13, CBM34	GH13,CBM34	3.2.1.54
2062007162	sg4i_00334100	contig00484	Not Binned	10927..12426(-)	Glycosidases	1500bp	499aa	0.64			COG0366	Glycosidases	3e-66	[G] Carbohydrate transport and metabolism	pfam00128	Alpha-amylase	1.2e-89	KO:K01234	neopullulanase [EC:3.2.1.135]						3.2.1.135	Neopullulanase.	GH13, CBM34	GH13,CBM34	3.2.1.54
2061983630	sg4i_00098780	contig18245	Not Binned	14035..16062(+)	alpha-1,4-glucan:alpha-1,4-glucan 6-glycosyltransferase	2028bp	675aa	0.6			COG0296	1,4-alpha-glucan branching enzyme		[G] Carbohydrate transport and metabolism	pfam00128; pfam02806; pfam02922	Alpha-amylase; Alpha-amylase_C; CBM_48	7.2e-15; 4.3e-15; 1.1e-23	KO:K00700	1,4-alpha-glucan branching enzyme [EC:2.4.1.18]			TIGR01515	alpha-1,4-glucan:alpha-1,4-glucan 6-glycosyltransferase		2.4.1.18	1,4-alpha-glucan branching enzyme.	GH13, CBM48	GH13,CBM48	2.4.1.18
2062012272	sg4i_00385200	contig00529	Not Binned	222..2375(+)	isoamylase	2154bp	717aa	0.67			COG1523	Type II secretory pathway, pullulanase PulA and related glycosidases		[G] Carbohydrate transport and metabolism	pfam00128; pfam02922	Alpha-amylase; CBM_48	7.7e-19; 8.8e-20	KO:K02438	glycogen operon protein GlgX [EC:3.2.1.-]			TIGR02100	glycogen debranching enzyme GlgX		3.2.1.-	Hydrolases. Glycosylases. Glycosidases, i.e. enzymes hydrolyzing O- and S-glycosyl compounds.	GH13, CBM48	GH13,CBM48	3.2.1.68
2061994855	sg4i_00211030	contig06238	Not Binned	4..552(-)	Predicted glycosylase	549bp	183aa	0.66			COG2152	Predicted glycosylase	3e-16	[G] Carbohydrate transport and metabolism	pfam04041	DUF377	4.3e-09										GH130
2061985242	sg4i_00114900	contig15107	Not Binned	1..552(+)	Predicted glycosylase	552bp	183aa	0.7			COG2152	Predicted glycosylase	2e-53	[G] Carbohydrate transport and metabolism	pfam04041	DUF377	5.8e-49										GH130	GT2
2061985413	sg4i_00116610	contig15108	Not Binned	3..557(+)	Predicted glycosylase	555bp	184aa	0.69			COG2152	Predicted glycosylase	9e-54	[G] Carbohydrate transport and metabolism	pfam04041	DUF377	6.9e-47										GH130	GT2
2061991306	sg4i_00175540	contig07695	Not Binned	1..549(+)	Predicted glycosylase	549bp	182aa	0.66			COG2152	Predicted glycosylase	5e-51	[G] Carbohydrate transport and metabolism	pfam04041	DUF377	2.1e-45										GH130	GT2
2062013804	sg4i_00400520	contig07158	Not Binned	2..519(-)	Glucoamylase and related glycosyl hydrolases	518bp	172aa	0.71	Yes		COG3387	Glucoamylase and related glycosyl hydrolases	5e-26	[G] Carbohydrate transport and metabolism	pfam00723	Glyco_hydro_15	5.7e-24										GH15	GH15	3.2.1.28
2061983634	sg4i_00098820	contig18245	Not Binned	19752..21722(+)	glucoamylase (EC:3.2.1.3)	1971bp	656aa	0.63			COG3387	Glucoamylase and related glycosyl hydrolases	1e-95	[G] Carbohydrate transport and metabolism	pfam00723	Glyco_hydro_15	3.1e-11										GH15	GH15	3.2.1.3
2061988164	sg4i_00144120	contig02281	Not Binned	398..1228(-)	Glucoamylase and related glycosyl hydrolases	831bp	276aa	0.69			COG3387	Glucoamylase and related glycosyl hydrolases	3e-47	[G] Carbohydrate transport and metabolism	pfam00723	Glyco_hydro_15	4e-08										GH15	GH15	3.2.1.3
2062000006	sg4i_00262540	contig12691	Not Binned	78..608(+)	Glucoamylase and related glycosyl hydrolases	531bp	176aa	0.73			COG3387	Glucoamylase and related glycosyl hydrolases	3e-21	[G] Carbohydrate transport and metabolism	pfam00723	Glyco_hydro_15	2.3e-19										GH15	GH15	3.2.1.3
2062000007	sg4i_00262550	contig12691	Not Binned	605..970(+)	Glucoamylase and related glycosyl hydrolases	366bp	121aa	0.71			COG3387	Glucoamylase and related glycosyl hydrolases	1e-29	[G] Carbohydrate transport and metabolism	pfam00723	Glyco_hydro_15	2.4e-07										GH15	GH15	3.2.1.3
2062007152	sg4i_00334000	contig00484	Not Binned	2..1771(-)	Glucoamylase and related glycosyl hydrolases	1770bp	590aa	0.63			COG3387	Glucoamylase and related glycosyl hydrolases	8e-57	[G] Carbohydrate transport and metabolism	pfam04685	DUF608	9.7e-10					TIGR01577	oligosaccharide amylase				GH15	GH15	3.2.1.3
2062017887	sg4i_00441350	contig12921	Not Binned	4368..4892(-)	Glucoamylase and related glycosyl hydrolases	525bp	174aa	0.66			COG3387	Glucoamylase and related glycosyl hydrolases	1e-27	[G] Carbohydrate transport and metabolism													GH15	GH15	3.2.1.3
2062022484	sg4i_00487320	contig08809	Not Binned	51..656(-)	Glucoamylase and related glycosyl hydrolases	606bp	201aa	0.7			COG3387	Glucoamylase and related glycosyl hydrolases	2e-27	[G] Carbohydrate transport and metabolism													GH15	GH15	3.2.1.3
2062024981	sg4i_00512290	contig14788	Not Binned	6..476(+)	Glucoamylase and related glycosyl hydrolases	471bp	156aa	0.66			COG3387	Glucoamylase and related glycosyl hydrolases	2e-27	[G] Carbohydrate transport and metabolism													GH15	GH15	3.2.1.3
2062029767	sg4i_00560150	contig07616	Not Binned	2..376(+)	Glucoamylase and related glycosyl hydrolases	375bp	124aa	0.69			COG3387	Glucoamylase and related glycosyl hydrolases	7e-23	[G] Carbohydrate transport and metabolism	pfam07721	TPR_4	0.00013										GH15	GH15	3.2.1.3
2062032355	sg4i_00586030	contig13219	Not Binned	3..1682(-)	Glucoamylase and related glycosyl hydrolases	1680bp	560aa	0.67			COG3387	Glucoamylase and related glycosyl hydrolases	3e-84	[G] Carbohydrate transport and metabolism	pfam00723	Glyco_hydro_15	1.9e-09										GH15	GH15	3.2.1.3
2062033923	sg4i_00601710	contig01332	Not Binned	180..2000(+)	Glucoamylase and related glycosyl hydrolases	1821bp	606aa	0.63			COG3387	Glucoamylase and related glycosyl hydrolases	5e-105	[G] Carbohydrate transport and metabolism	pfam00723	Glyco_hydro_15	1.7e-56										GH15	GH15	3.2.1.3
2062003626	sg4i_00298740	contig13159	Not Binned	1..726(+)	Beta-glucanase/Beta-glucan synthetase	726bp	241aa	0.68			COG2273	Beta-glucanase/Beta-glucan synthetase	8e-17	[G] Carbohydrate transport and metabolism	pfam00722	Glyco_hydro_16	2.1e-29										GH16	GH16	3.2.1.39
2062028747	sg4i_00549950	contig20573	Not Binned	505..1497(+)	Beta-glucanase/Beta-glucan synthetase	993bp	330aa	0.57	Yes		COG2273	Beta-glucanase/Beta-glucan synthetase	5e-28	[G] Carbohydrate transport and metabolism	pfam00722	Glyco_hydro_16	2.4e-34										GH16	GH16,CBM13,CBM6	3.2.1.39
2061990988	sg4i_00172360	contig13497	Not Binned	3..3833(+)	Beta-glucanase/Beta-glucan synthetase	3831bp	1277aa	0.66	Yes		COG2273	Beta-glucanase/Beta-glucan synthetase	1e-30	[G] Carbohydrate transport and metabolism	pfam00395; pfam00395; pfam00722; pfam02018; pfam02018; pfam02018	SLH; SLH; Glyco_hydro_16; CBM_4_9; CBM_4_9; CBM_4_9	1.9e-13; 1.9e-10; 8.2e-35; 5.0e-12; 6.1e-11; 4.8e-09										GH16, CBM4, CBM54, SLH	GH16,CBM32,CBM4	3.2.1.39
2062025525	sg4i_00517730	contig13194	Not Binned	8965..10227(-)	Beta-glucanase/Beta-glucan synthetase	1263bp	420aa	0.64	Yes	Yes	COG2273	Beta-glucanase/Beta-glucan synthetase	2e-11	[G] Carbohydrate transport and metabolism	pfam00722	Glyco_hydro_16	1.1e-24										GH16, CBM56	GH16,CBM6	3.2.1.39
2061997072	sg4i_00233200	contig18332	Not Binned	13016..14749(+)	Predicted glycosyl hydrolase	1734bp	577aa	0.63	Yes	Yes	COG3858	Predicted glycosyl hydrolase	1e-40	[R] General function prediction only	pfam00704; pfam07833; pfam08239	Glyco_hydro_18; Cu_amine_oxidN1; SH3_3	5.9e-25; 1.1e-08; 3.8e-07										GH18	GH18
2062006983	sg4i_00332310	contig18402	Not Binned	8366..10231(+)	Predicted glycosyl hydrolase	1866bp	621aa	0.61			COG3858	Predicted glycosyl hydrolase	1e-39	[R] General function prediction only	pfam00704	Glyco_hydro_18	3.7e-32										GH18	GH18
2062011497	sg4i_00377450	contig00754	Not Binned	3221..4639(-)	Predicted glycosyl hydrolase	1419bp	472aa	0.66			COG3858	Predicted glycosyl hydrolase	5e-61	[R] General function prediction only	pfam00704	Glyco_hydro_18	1.8e-35										GH18	GH18
2062013043	sg4i_00392910	contig11561	Not Binned	836..2500(-)	Predicted glycosyl hydrolase	1665bp	554aa	0.65			COG3858	Predicted glycosyl hydrolase	1e-40	[R] General function prediction only	pfam00704; pfam07833; pfam08239	Glyco_hydro_18; Cu_amine_oxidN1; SH3_3	2.9e-25; 1.7e-04; 3.0e-08										GH18	GH18
2062032605	sg4i_00588530	contig06728	Not Binned	6..656(-)	hypothetical protein	651bp	217aa	0.68																			GH18	GH18,CBM16	3.2.1.14
2061984590	sg4i_00108380	contig01532	Not Binned	17..475(-)	Predicted glycosyl hydrolase	459bp	152aa	0.64			COG3858	Predicted glycosyl hydrolase	4e-47	[R] General function prediction only	pfam00704	Glyco_hydro_18	5.8e-15										GH18	GH18,CBM50
2061985739	sg4i_00119870	contig00317	Not Binned	3..647(-)	Predicted glycosyl hydrolase	645bp	215aa	0.65	Yes	Yes	COG3858	Predicted glycosyl hydrolase	1e-21	[R] General function prediction only	pfam00704	Glyco_hydro_18	2.2e-15										GH18	GH18,CE4,GT2
2062009085	sg4i_00353330	contig18630	Not Binned	4621..6669(+)	Beta-galactosidase/beta-glucuronidase	2049bp	682aa	0.72			COG3250	Beta-galactosidase/beta-glucuronidase	2e-28	[G] Carbohydrate transport and metabolism	pfam02836	Glyco_hydro_2_C	9.4e-18	KO:K01190; KO:K01192	beta-galactosidase [EC:3.2.1.23]; beta-mannosidase [EC:3.2.1.25]	0.0e+00; 0.0e+00					3.2.1.23; 3.2.1.25	Beta-galactosidase.; Beta-mannosidase.	GH2	GH2
2062017011	sg4i_00432590	contig01183	Not Binned	6989..8854(+)	Beta-galactosidase/beta-glucuronidase	1866bp	621aa	0.58			COG3250	Beta-galactosidase/beta-glucuronidase	2e-25	[G] Carbohydrate transport and metabolism	pfam00703; pfam02836	Glyco_hydro_2; Glyco_hydro_2_C	3.0e-09; 1.7e-10										GH2	GH2
2062001796	sg4i_00280440	contig19365	Not Binned	1419..3986(+)	beta-mannosidase (EC 3.2.1.25)	2568bp	855aa	0.66			COG3250	Beta-galactosidase/beta-glucuronidase	1e-98	[G] Carbohydrate transport and metabolism	pfam00703; pfam02836; pfam02837	Glyco_hydro_2; Glyco_hydro_2_C; Glyco_hydro_2_N	1.2e-08; 9.1e-06; 2.7e-08	KO:K01192	beta-mannosidase [EC:3.2.1.25]						3.2.1.25	Beta-mannosidase.	GH2	GH2	3.2.1.25
2062022656	sg4i_00489040	contig19024	Not Binned	2336..4153(+)	protease FtsH subunit HflK	1818bp	605aa	0.61			COG3250	Beta-galactosidase/beta-glucuronidase	1e-55	[G] Carbohydrate transport and metabolism	pfam02836; pfam02837	Glyco_hydro_2_C; Glyco_hydro_2_N	4.1e-37; 9.6e-31	KO:K01195	beta-glucuronidase [EC:3.2.1.31]		M00152: Dermatan sulfate degradation; M00153: Chondroitin sulfate degradation; M00154: Heparan sulfate degradation				3.2.1.31	Beta-glucuronidase.	GH2	GH2	3.2.1.31
2062034416	sg4i_00606640	contig01421	Not Binned	184..1461(-)	protease FtsH subunit HflK	1278bp	425aa	0.62			COG3250	Beta-galactosidase/beta-glucuronidase	1e-41	[G] Carbohydrate transport and metabolism	pfam00703; pfam02836	Glyco_hydro_2; Glyco_hydro_2_C	5.5e-06; 2.6e-41	KO:K01195	beta-glucuronidase [EC:3.2.1.31]		M00152: Dermatan sulfate degradation; M00153: Chondroitin sulfate degradation; M00154: Heparan sulfate degradation				3.2.1.31	Beta-glucuronidase.	GH2	GH2	3.2.1.31
2062009083	sg4i_00353310	contig18630	Not Binned	507..2231(+)	Beta-galactosidase/beta-glucuronidase	1725bp	574aa	0.73			COG3250	Beta-galactosidase/beta-glucuronidase	3e-33	[G] Carbohydrate transport and metabolism	pfam02836; pfam02837	Glyco_hydro_2_C; Glyco_hydro_2_N	5.1e-11; 1.1e-21	KO:K01190	beta-galactosidase [EC:3.2.1.23]						3.2.1.23	Beta-galactosidase.	GH2, GH5	GH2
2061978029	sg4i_00042770	contig12349	Not Binned	481..3057(+)	N-acetyl-beta-hexosaminidase	2577bp	858aa	0.7	Yes		COG3525	N-acetyl-beta-hexosaminidase	1e-97	[G] Carbohydrate transport and metabolism	pfam00728; pfam02838; pfam03173; pfam03174	Glyco_hydro_20; Glyco_hydro_20b; CHB_HEX; CHB_HEX_C	1.2e-113; 2.1e-05; 8.8e-14; 2.9e-20	KO:K12373	beta-hexosaminidase [EC:3.2.1.52]		M00155: Keratan sulfate degradation				3.2.1.52	Beta-N-acetylhexosaminidase.	GH20	GH20	3.2.1.52
2062027832	sg4i_00540800	contig20066	Not Binned	598..2421(-)	N-acetyl-beta-hexosaminidase	1824bp	607aa	0.69			COG3525	N-acetyl-beta-hexosaminidase	7e-94	[G] Carbohydrate transport and metabolism	pfam00728; pfam02838; pfam03174	Glyco_hydro_20; Glyco_hydro_20b; CHB_HEX_C	2.3e-116; 9.5e-06; 3.1e-19	KO:K12373	beta-hexosaminidase [EC:3.2.1.52]		M00155: Keratan sulfate degradation				3.2.1.52	Beta-N-acetylhexosaminidase.	GH20	GH20	3.2.1.52
2062000354	sg4i_00266020	contig13673	Not Binned	3..2054(-)	N-acetyl-beta-hexosaminidase	2052bp	684aa	0.69			COG3525	N-acetyl-beta-hexosaminidase	3e-112	[G] Carbohydrate transport and metabolism	pfam00728; pfam02838; pfam07691	Glyco_hydro_20; Glyco_hydro_20b; PA14	1.1e-121; 1.5e-05; 9.7e-11	KO:K12373	beta-hexosaminidase [EC:3.2.1.52]		M00155: Keratan sulfate degradation				3.2.1.52	Beta-N-acetylhexosaminidase.	GH20	GH20,CBM32	3.2.1.52
2061974824	sg4i_00010720	contig02915	Not Binned	3..749(+)	Transglycosylase-like domain.	747bp	248aa	0.76			COG3883	Uncharacterized protein conserved in bacteria	4e-07	[S] Function unknown	pfam06737	Transglycosylas	3.9e-18										GH23
2061984599	sg4i_00108470	contig03752	Not Binned	3..515(+)	Transglycosylase SLT domain.	513bp	170aa	0.76							pfam01464	SLT	2.9e-12										GH23
2061992209	sg4i_00184570	contig02782	Not Binned	404..634(+)	hypothetical protein	231bp	76aa	0.67																			GH23
2061993562	sg4i_00198100	contig03530	Not Binned	3..476(+)	Soluble lytic murein transglycosylase and related regulatory proteins (some contain LysM/invasin domains)	474bp	157aa	0.7			COG0741	Soluble lytic murein transglycosylase and related regulatory proteins (some contain LysM/invasin domains)	2e-13	[M] Cell wall/membrane/envelope biogenesis	pfam01464	SLT	1.7e-20	KO:K08309	soluble lytic murein transglycosylase [EC:3.2.1.-]	2e-17					3.2.1.-	Hydrolases. Glycosylases. Glycosidases, i.e. enzymes hydrolyzing O- and S-glycosyl compounds.	GH23
2062008072	sg4i_00343200	contig03521	Not Binned	231..878(-)	Soluble lytic murein transglycosylase and related regulatory proteins (some contain LysM/invasin domains)	648bp	215aa	0.69			COG0741	Soluble lytic murein transglycosylase and related regulatory proteins (some contain LysM/invasin domains)	9e-11	[M] Cell wall/membrane/envelope biogenesis	pfam01464	SLT	3.6e-14										GH23
2062008320	sg4i_00345680	contig08166	Not Binned	88..576(-)	Soluble lytic murein transglycosylase and related regulatory proteins (some contain LysM/invasin domains)	489bp	162aa	0.72			COG0741	Soluble lytic murein transglycosylase and related regulatory proteins (some contain LysM/invasin domains)	9e-17	[M] Cell wall/membrane/envelope biogenesis	pfam01464	SLT	4.2e-25										GH23
2062009655	sg4i_00359030	contig02497	Not Binned	3..191(+)	hypothetical protein	189bp	62aa	0.65																			GH23
2062028796	sg4i_00550440	contig10596	Not Binned	9..515(-)	Soluble lytic murein transglycosylase and related regulatory proteins (some contain LysM/invasin domains)	507bp	168aa	0.68			COG0741	Soluble lytic murein transglycosylase and related regulatory proteins (some contain LysM/invasin domains)	2e-09	[M] Cell wall/membrane/envelope biogenesis	pfam01464	SLT	3.4e-12										GH23
2062030182	sg4i_00564300	contig04597	Not Binned	3..983(+)	hypothetical protein	981bp	326aa	0.75	Yes																		GH23
2062032130	sg4i_00583780	contig18653	Not Binned	4221..4667(-)	Soluble lytic murein transglycosylase and related regulatory proteins (some contain LysM/invasin domains)	447bp	148aa	0.73	Yes		COG0741	Soluble lytic murein transglycosylase and related regulatory proteins (some contain LysM/invasin domains)	4e-08	[M] Cell wall/membrane/envelope biogenesis	pfam01464	SLT	1.6e-17										GH23
2061990321	sg4i_00165690	contig04369	Not Binned	1..534(+)	Soluble lytic murein transglycosylase and related regulatory proteins (some contain LysM/invasin domains)	534bp	177aa	0.69			COG0741	Soluble lytic murein transglycosylase and related regulatory proteins (some contain LysM/invasin domains)	4e-22	[M] Cell wall/membrane/envelope biogenesis	pfam01464	SLT	3.2e-24	KO:K08309	soluble lytic murein transglycosylase [EC:3.2.1.-]	2e-40					3.2.1.-	Hydrolases. Glycosylases. Glycosidases, i.e. enzymes hydrolyzing O- and S-glycosyl compounds.	GH23	GH23
2061998318	sg4i_00245660	contig20845	Not Binned	2..580(+)	Soluble lytic murein transglycosylase and related regulatory proteins (some contain LysM/invasin domains)	579bp	192aa	0.7			COG0741	Soluble lytic murein transglycosylase and related regulatory proteins (some contain LysM/invasin domains)	4e-14	[M] Cell wall/membrane/envelope biogenesis	pfam01464	SLT	6.8e-22										GH23	GH23
2062000430	sg4i_00266780	contig00433	Not Binned	3419..3949(+)	Predicted soluble lytic transglycosylase fused to an ABC-type amino acid-binding protein	531bp	176aa	0.67	Yes		COG4623	Predicted soluble lytic transglycosylase fused to an ABC-type amino acid-binding protein	1e-19	[M] Cell wall/membrane/envelope biogenesis	pfam01464	SLT	1.1e-28										GH23	GH23
2062004308	sg4i_00305560	contig01711	Not Binned	1026..1988(-)	Membrane proteins related to metalloendopeptidases	963bp	320aa	0.7			COG0739	Membrane proteins related to metalloendopeptidases	7e-28	[M] Cell wall/membrane/envelope biogenesis	pfam01464; pfam01551	SLT; Peptidase_M23	8.7e-30; 3.1e-34										GH23	GH23
2062009350	sg4i_00355980	contig03229	Not Binned	2..874(-)	Membrane-bound lytic murein transglycosylase B	873bp	291aa	0.7			COG2951	Membrane-bound lytic murein transglycosylase B	2e-11	[M] Cell wall/membrane/envelope biogenesis	pfam01464; pfam01551	SLT; Peptidase_M23	9.0e-15; 1.1e-08										GH23	GH23
2062010870	sg4i_00371180	contig11514	Not Binned	224..943(+)	Transglycosylase SLT domain.	720bp	239aa	0.7	Yes	Yes					pfam01464	SLT	7.3e-10										GH23	GH23
2062011408	sg4i_00376560	contig12836	Not Binned	188..2134(+)	Soluble lytic murein transglycosylase and related regulatory proteins (some contain LysM/invasin domains)	1947bp	649aa	0.71	Yes		COG0741	Soluble lytic murein transglycosylase and related regulatory proteins (some contain LysM/invasin domains)	4e-14	[M] Cell wall/membrane/envelope biogenesis	pfam01464	SLT	1.2e-17										GH23	GH23
2062014824	sg4i_00410720	contig19962	Not Binned	2..1459(-)	Soluble lytic murein transglycosylase and related regulatory proteins (some contain LysM/invasin domains)	1458bp	486aa	0.74	Yes		COG0741	Soluble lytic murein transglycosylase and related regulatory proteins (some contain LysM/invasin domains)	1e-10	[M] Cell wall/membrane/envelope biogenesis	pfam01464	SLT	3.3e-16	KO:K08309	soluble lytic murein transglycosylase [EC:3.2.1.-]						3.2.1.-	Hydrolases. Glycosylases. Glycosidases, i.e. enzymes hydrolyzing O- and S-glycosyl compounds.	GH23	GH23
2062016806	sg4i_00430540	contig18636	Not Binned	2873..3364(-)	Soluble lytic murein transglycosylase and related regulatory proteins (some contain LysM/invasin domains)	492bp	163aa	0.7	Yes		COG0741	Soluble lytic murein transglycosylase and related regulatory proteins (some contain LysM/invasin domains)	4e-11	[M] Cell wall/membrane/envelope biogenesis	pfam01464	SLT	9.8e-22										GH23	GH23
2062023752	sg4i_00500000	contig10388	Not Binned	2..1162(+)	Soluble lytic murein transglycosylase and related regulatory proteins (some contain LysM/invasin domains)	1161bp	387aa	0.73			COG0741	Soluble lytic murein transglycosylase and related regulatory proteins (some contain LysM/invasin domains)	1e-10	[M] Cell wall/membrane/envelope biogenesis	pfam01464	SLT	2e-16	KO:K08309	soluble lytic murein transglycosylase [EC:3.2.1.-]						3.2.1.-	Hydrolases. Glycosylases. Glycosidases, i.e. enzymes hydrolyzing O- and S-glycosyl compounds.	GH23	GH23
2062033430	sg4i_00596780	contig16630	Not Binned	1..1305(+)	Soluble lytic murein transglycosylase and related regulatory proteins (some contain LysM/invasin domains)	1305bp	434aa	0.73			COG0741	Soluble lytic murein transglycosylase and related regulatory proteins (some contain LysM/invasin domains)	3e-14	[M] Cell wall/membrane/envelope biogenesis	pfam01464	SLT	5e-22	KO:K08309	soluble lytic murein transglycosylase [EC:3.2.1.-]						3.2.1.-	Hydrolases. Glycosylases. Glycosidases, i.e. enzymes hydrolyzing O- and S-glycosyl compounds.	GH23	GH23
2061997506	sg4i_00237540	contig13620	Not Binned	3..947(+)	Soluble lytic murein transglycosylase and related regulatory proteins (some contain LysM/invasin domains)	945bp	314aa	0.69			COG0741	Soluble lytic murein transglycosylase and related regulatory proteins (some contain LysM/invasin domains)	6e-20	[M] Cell wall/membrane/envelope biogenesis	pfam01464	SLT	8.2e-24										GH23	GH23	3.2.1.-
2062001847	sg4i_00280950	contig02419	Not Binned	588..1604(+)	Soluble lytic murein transglycosylase and related regulatory proteins (some contain LysM/invasin domains)	1017bp	339aa	0.69	Yes		COG0741	Soluble lytic murein transglycosylase and related regulatory proteins (some contain LysM/invasin domains)	4e-11	[M] Cell wall/membrane/envelope biogenesis	pfam01464	SLT	9.5e-25										GH23	GH23	3.2.1.-
2062002267	sg4i_00285150	contig18368	Not Binned	5389..6000(+)	Soluble lytic murein transglycosylase and related regulatory proteins (some contain LysM/invasin domains)	612bp	203aa	0.65	Yes	Yes	COG0741	Soluble lytic murein transglycosylase and related regulatory proteins (some contain LysM/invasin domains)	9e-22	[M] Cell wall/membrane/envelope biogenesis	pfam01464	SLT	2.8e-24	KO:K08309	soluble lytic murein transglycosylase [EC:3.2.1.-]	1e-44					3.2.1.-	Hydrolases. Glycosylases. Glycosidases, i.e. enzymes hydrolyzing O- and S-glycosyl compounds.	GH23	GH23	3.2.1.-
2062033247	sg4i_00594950	contig00126	Not Binned	1..975(+)	Soluble lytic murein transglycosylase and related regulatory proteins (some contain LysM/invasin domains)	975bp	325aa	0.65			COG0741	Soluble lytic murein transglycosylase and related regulatory proteins (some contain LysM/invasin domains)	1e-10	[M] Cell wall/membrane/envelope biogenesis	pfam01464	SLT	2.7e-27										GH23	GH23	3.2.1.-
2062031863	sg4i_00581110	contig04883	Not Binned	2..976(+)	FOG: LysM repeat	975bp	324aa	0.73			COG1388	FOG: LysM repeat	6e-14	[M] Cell wall/membrane/envelope biogenesis	pfam01464; pfam01476; pfam01476	SLT; LysM; LysM	1.7e-18; 2.2e-12; 1.7e-11										GH23, CBM50	GH23
2061988112	sg4i_00143600	contig09551	Not Binned	2..640(+)	Lyzozyme M1 (1,4-beta-N-acetylmuramidase)	639bp	212aa	0.73			COG3757	Lyzozyme M1 (1,4-beta-N-acetylmuramidase)	2e-19	[M] Cell wall/membrane/envelope biogenesis	pfam01183	Glyco_hydro_25	5.5e-34	KO:K07273	lysozyme	2e-24							GH25	GH25
2062034226	sg4i_00604740	contig07768	Not Binned	63..1106(-)	Beta-mannanase	1044bp	347aa	0.66			COG4124	Beta-mannanase	2e-14	[G] Carbohydrate transport and metabolism	pfam02156	Glyco_hydro_26	1.1e-44	KO:K01218	mannan endo-1,4-beta-mannosidase [EC:3.2.1.78]						3.2.1.78	Mannan endo-1,4-beta-mannosidase.	GH26	GH26	3.2.1.78
2062022687	sg4i_00489350	contig05640	Not Binned	3..530(+)	hypothetical protein	528bp	176aa	0.61																			GH27	GH27
2062034787	sg4i_00610350	contig03953	Not Binned	3..533(+)	Endopolygalacturonase	531bp	177aa	0.66			COG5434	Endopolygalacturonase	9e-44	[M] Cell wall/membrane/envelope biogenesis	pfam00295	Glyco_hydro_28	6.7e-23										GH28	GH28	3.2.1.67
2062000325	sg4i_00265730	contig01028	Not Binned	1366..3387(-)	Alpha-L-fucosidase./Beta-galactosidase trimerisation domain.	2022bp	673aa	0.61							pfam01120; pfam08532	Alpha_L_fucos; Glyco_hydro_42M	6.4e-07; 1.2e-06										GH29
2061998514	sg4i_00247620	contig01653	Not Binned	1005..2381(+)	Alpha-L-fucosidase	1377bp	458aa	0.67	Yes		COG3669	Alpha-L-fucosidase	6e-41	[G] Carbohydrate transport and metabolism	pfam01120	Alpha_L_fucos	4.8e-114	KO:K01206	alpha-L-fucosidase [EC:3.2.1.51]	2e-112					3.2.1.51	Alpha-L-fucosidase.	GH29	GH29	3.2.1.51
2062023960	sg4i_00502080	contig04396	Not Binned	1..1281(+)	Alpha-L-fucosidase	1281bp	426aa	0.7			COG3669	Alpha-L-fucosidase	6e-59	[G] Carbohydrate transport and metabolism	pfam00754; pfam01120	F5_F8_type_C; Alpha_L_fucos	6.5e-13; 4.8e-39	KO:K01206	alpha-L-fucosidase [EC:3.2.1.51]	2e-114					3.2.1.51	Alpha-L-fucosidase.	GH29, CBM32	GH29	3.2.1.51
2061981134	sg4i_00073820	contig13313	Not Binned	29..433(-)	Beta-glucosidase-related glycosidases	405bp	135aa	0.75			COG1472	Beta-glucosidase-related glycosidases	1e-26	[G] Carbohydrate transport and metabolism	pfam00933	Glyco_hydro_3	5.6e-19										GH3	GH3
2062002993	sg4i_00292410	contig12723	Not Binned	2343..4022(-)	Beta-glucosidase-related glycosidases	1680bp	559aa	0.64			COG1472	Beta-glucosidase-related glycosidases	9e-79	[G] Carbohydrate transport and metabolism	pfam00933; pfam01915	Glyco_hydro_3; Glyco_hydro_3_C	9.2e-70; 1.1e-10										GH3	GH3	3.2.1.21
2062005534	sg4i_00317820	contig02456	Not Binned	5043..5999(-)	Beta-glucosidase-related glycosidases	957bp	318aa	0.64			COG1472	Beta-glucosidase-related glycosidases	8e-55	[G] Carbohydrate transport and metabolism	pfam00933	Glyco_hydro_3	3.8e-76										GH3	GH3	3.2.1.21
2062013298	sg4i_00395460	contig17514	Not Binned	2..1297(-)	Beta-glucosidase-related glycosidases	1296bp	432aa	0.69			COG1472	Beta-glucosidase-related glycosidases	8e-81	[G] Carbohydrate transport and metabolism	pfam00933; pfam01915	Glyco_hydro_3; Glyco_hydro_3_C	3.2e-70; 1.8e-11										GH3	GH3	3.2.1.21
2062012385	sg4i_00386330	contig03269	Not Binned	1870..4167(-)	Beta-glucosidase-related glycosidases	2298bp	765aa	0.7			COG1472	Beta-glucosidase-related glycosidases	3e-77	[G] Carbohydrate transport and metabolism	pfam00933; pfam01915	Glyco_hydro_3; Glyco_hydro_3_C	8.5e-67; 9.2e-66	KO:K05349	beta-glucosidase [EC:3.2.1.21]						3.2.1.21	Beta-glucosidase.	GH3	GH3	3.2.1.37
2061978385	sg4i_00046330	contig10938	Not Binned	1381..3012(+)	Beta-glucosidase-related glycosidases	1632bp	543aa	0.72			COG1472	Beta-glucosidase-related glycosidases	2e-73	[G] Carbohydrate transport and metabolism	pfam00933; pfam01915	Glyco_hydro_3; Glyco_hydro_3_C	1.7e-59; 8.0e-07	KO:K01207	beta-N-acetylhexosaminidase [EC:3.2.1.52]						3.2.1.52	Beta-N-acetylhexosaminidase.	GH3	GH3	3.2.1.52
2061989282	sg4i_00155300	contig11524	Not Binned	1..746(+)	Beta-glucosidase-related glycosidases	746bp	249aa	0.75			COG1472	Beta-glucosidase-related glycosidases	3e-46	[G] Carbohydrate transport and metabolism	pfam00933	Glyco_hydro_3	6.4e-40										GH3	GH3	3.2.1.52
2061993783	sg4i_00200310	contig12627	Not Binned	116..1477(-)	beta-N-acetylhexosaminidase (EC:3.2.1.52)	1362bp	453aa	0.69	Yes		COG1472	Beta-glucosidase-related glycosidases	5e-70	[G] Carbohydrate transport and metabolism	pfam00933	Glyco_hydro_3	1.4e-59	KO:K01207	beta-N-acetylhexosaminidase [EC:3.2.1.52]	1e-90					3.2.1.52	Beta-N-acetylhexosaminidase.	GH3	GH3	3.2.1.52
2062011375	sg4i_00376230	contig06982	Not Binned	1..510(+)	Beta-glucosidase-related glycosidases	510bp	170aa	0.67			COG1472	Beta-glucosidase-related glycosidases	4e-40	[G] Carbohydrate transport and metabolism	pfam00933	Glyco_hydro_3	8.2e-21										GH3	GH3	3.2.1.52
2062024576	sg4i_00508240	contig07050	Not Binned	2..478(+)	beta-N-acetylhexosaminidase (EC:3.2.1.52)	477bp	159aa	0.71			COG1472	Beta-glucosidase-related glycosidases	4e-32	[G] Carbohydrate transport and metabolism	pfam00933	Glyco_hydro_3	2.7e-33										GH3	GH3	3.2.1.52
2062006100	sg4i_00323480	contig07920	Not Binned	1..510(+)	exo-1,4-beta-glucosidase (EC 3.2.1.74)	510bp	170aa	0.63			COG1472	Beta-glucosidase-related glycosidases	4e-34	[G] Carbohydrate transport and metabolism	pfam00933	Glyco_hydro_3	1.5e-41										GH3	GH3,CBM6	3.2.1.74
2062006443	sg4i_00326910	contig05595	Not Binned	3..746(+)	exo-1,4-beta-glucosidase (EC 3.2.1.74)	744bp	248aa	0.66			COG1472	Beta-glucosidase-related glycosidases	2e-43	[G] Carbohydrate transport and metabolism	pfam00933	Glyco_hydro_3	3.4e-51										GH3	GH3,CBM6	3.2.1.74
2062032069	sg4i_00583170	contig08720	Not Binned	2..457(+)	exo-1,4-beta-glucosidase (EC 3.2.1.74)	456bp	152aa	0.71	Yes		COG1472	Beta-glucosidase-related glycosidases	5e-11	[G] Carbohydrate transport and metabolism	pfam00933	Glyco_hydro_3	5.3e-11										GH3	GH3,CBM6	3.2.1.74
2062006470	sg4i_00327180	contig00478	Not Binned	9425..10813(+)	O-Glycosyl hydrolase	1389bp	462aa	0.66			COG5520	O-Glycosyl hydrolase	2e-66	[M] Cell wall/membrane/envelope biogenesis	pfam02055	Glyco_hydro_30	2.1e-93	KO:K01201	glucosylceramidase [EC:3.2.1.45]						3.2.1.45	Glucosylceramidase.	GH30	GH30	3.2.1.45
2061993018	sg4i_00192660	contig03341	Not Binned	340..954(-)	Alpha-glucosidases, family 31 of glycosyl hydrolases	615bp	204aa	0.66			COG1501	Alpha-glucosidases, family 31 of glycosyl hydrolases	1e-48	[G] Carbohydrate transport and metabolism	pfam01055	Glyco_hydro_31	7.5e-55										GH31	GH31	2.4.1.-
2062029070	sg4i_00553180	contig01989	Not Binned	760..1776(-)	Alpha-glucosidases, family 31 of glycosyl hydrolases	1017bp	338aa	0.65			COG1501	Alpha-glucosidases, family 31 of glycosyl hydrolases	8e-55	[G] Carbohydrate transport and metabolism	pfam01055	Glyco_hydro_31	2.7e-57										GH31	GH31	2.4.1.-
2062010576	sg4i_00368240	contig18429	Not Binned	7988..10342(-)	Alpha-glucosidases, family 31 of glycosyl hydrolases	2355bp	784aa	0.65			COG1501	Alpha-glucosidases, family 31 of glycosyl hydrolases		[G] Carbohydrate transport and metabolism	pfam01055	Glyco_hydro_31	5.3e-126	KO:K01811	putative family 31 glucosidase								GH31	GH31	3.2.1.-
2061986227	sg4i_00124750	contig13422	Not Binned	2..1603(-)	Alpha-glucosidases, family 31 of glycosyl hydrolases	1602bp	534aa	0.71			COG1501	Alpha-glucosidases, family 31 of glycosyl hydrolases	3e-113	[G] Carbohydrate transport and metabolism	pfam01055	Glyco_hydro_31	7.6e-115										GH31	GH31	3.2.1.20
2062009084	sg4i_00353320	contig18630	Not Binned	2243..4624(+)	Alpha-glucosidases, family 31 of glycosyl hydrolases	2382bp	793aa	0.74	Yes		COG1501	Alpha-glucosidases, family 31 of glycosyl hydrolases		[G] Carbohydrate transport and metabolism	pfam01055	Glyco_hydro_31		KO:K01187	alpha-glucosidase [EC:3.2.1.20]						3.2.1.20	Alpha-glucosidase.	GH31	GH31	3.2.1.20
2062010329	sg4i_00365770	contig10778	Not Binned	203..2338(+)	Alpha-glucosidases, family 31 of glycosyl hydrolases	2136bp	712aa	0.67	Yes		COG1501	Alpha-glucosidases, family 31 of glycosyl hydrolases		[G] Carbohydrate transport and metabolism	pfam01055	Glyco_hydro_31		KO:K01187	alpha-glucosidase [EC:3.2.1.20]						3.2.1.20	Alpha-glucosidase.	GH31	GH31	3.2.1.20
2062016234	sg4i_00424820	contig12896	Not Binned	1..975(-)	beta-fructofuranosidase (EC 3.2.1.26)	975bp	325aa	0.66			COG1621	Beta-fructosidases (levanase/invertase)	3e-82	[G] Carbohydrate transport and metabolism	pfam00251	Glyco_hydro_32N	1e-78										GH32	GH32	3.2.1.26
2061991446	sg4i_00176940	contig11122	Not Binned	110..3349(+)	Uncharacterized protein related to plant photosystem II stability/assembly factor	3240bp	1079aa	0.69			COG4447	Uncharacterized protein related to plant photosystem II stability/assembly factor	3e-09	[R] General function prediction only	pfam02012; pfam02012; pfam02012; pfam02012; pfam02012; pfam02012; pfam02012; pfam02012; pfam02012; pfam02012	BNR; BNR; BNR; BNR; BNR; BNR; BNR; BNR; BNR; BNR	1.8e-02; 6.6e-02; 1.1e-01; 1.6e-01; 1.7e-01; 1.5e+00; 1.9e+00; 6.4e+00; 8.9e+00; 2.4e+01										GH33, GH74	GH0
2061977992	sg4i_00042400	contig00853	Not Binned	1066..1512(+)	Beta-galactosidase	447bp	149aa	0.62			COG1874	Beta-galactosidase	4e-12	[G] Carbohydrate transport and metabolism	pfam01301	Glyco_hydro_35	3e-33										GH35	GH35
2062025699	sg4i_00519470	contig01266	Not Binned	3..1115(-)	hypothetical protein	1113bp	371aa	0.66																			GH35	GH35
2062025391	sg4i_00516390	contig01264	Not Binned	1..909(-)	Beta-galactosidase	909bp	303aa	0.63			COG1874	Beta-galactosidase	5e-29	[G] Carbohydrate transport and metabolism	pfam01301	Glyco_hydro_35	1.5e-48										GH35	GH35	3.2.1.-
2062002278	sg4i_00285260	contig18368	Not Binned	11722..12543(+)	Beta-galactosidase	822bp	273aa	0.6			COG1874	Beta-galactosidase	3e-16	[G] Carbohydrate transport and metabolism	pfam01301	Glyco_hydro_35	3.1e-48										GH35	GH35	3.2.1.23
2062017625	sg4i_00438730	contig13233	Not Binned	84..638(+)	Beta-galactosidase	555bp	185aa	0.63			COG1874	Beta-galactosidase	2e-18	[G] Carbohydrate transport and metabolism	pfam01301	Glyco_hydro_35	1.3e-53										GH35	GH35	3.2.1.23
2061989813	sg4i_00160610	contig18282	Not Binned	4923..7139(+)	Alpha-galactosidase	2217bp	738aa	0.61			COG3345	Alpha-galactosidase		[G] Carbohydrate transport and metabolism	pfam02065	Melibiase		KO:K07407	alpha-galactosidase [EC:3.2.1.22]						3.2.1.22	Alpha-galactosidase.	GH36	GH36	3.2.1.22
2062025359	sg4i_00516070	contig20546	Not Binned	1041..2153(-)	Alpha-galactosidase	1113bp	370aa	0.69			COG3345	Alpha-galactosidase	3e-34	[G] Carbohydrate transport and metabolism	pfam02065	Melibiase	7.9e-24	KO:K07407	alpha-galactosidase [EC:3.2.1.22]						3.2.1.22	Alpha-galactosidase.	GH36	GH36	3.2.1.22
2062034105	sg4i_00603530	contig19168	Not Binned	3243..5399(-)	Alpha-galactosidase	2157bp	718aa	0.62			COG3345	Alpha-galactosidase		[G] Carbohydrate transport and metabolism	pfam02065	Melibiase		KO:K07407	alpha-galactosidase [EC:3.2.1.22]						3.2.1.22	Alpha-galactosidase.	GH36	GH36	3.2.1.22
2062014780	sg4i_00410280	contig12874	Not Binned	1..963(-)	Glycosyl hydrolases family 38 N-terminal domain.	963bp	321aa	0.65							pfam01074	Glyco_hydro_38	1.3e-08										GH38
2061973786	sg4i_00000340	contig13114	Not Binned	405..2972(-)	Glycosyl hydrolases family 38 N-terminal domain.	2568bp	855aa	0.69							pfam01074	Glyco_hydro_38	8.8e-14										GH38	GH0
2061998140	sg4i_00243880	contig01649	Not Binned	3353..6520(-)	Glycosyl hydrolases family 38 N-terminal domain./Glycosyl hydrolases family 38 C-terminal domain.	3168bp	1055aa	0.61							pfam01074; pfam07748	Glyco_hydro_38; Glyco_hydro_38C	2.5e-18; 1.3e-04										GH38	GH0
2061993243	sg4i_00194910	contig06399	Not Binned	2..889(-)	hypothetical protein	888bp	296aa	0.71																			GH39
2062026518	sg4i_00527660	contig03565	Not Binned	3..752(-)	Cellulase (glycosyl hydrolase family 5).	750bp	250aa	0.72	Yes						pfam00150	Cellulase	2.8e-14										GH39
2062031163	sg4i_00574110	contig04650	Not Binned	1837..2826(+)	hypothetical protein	990bp	330aa	0.75	Yes	Yes																	GH39
2061986067	sg4i_00123150	contig13416	Not Binned	3..980(-)	Glycosyl hydrolases family 39.	978bp	326aa	0.68							pfam01229	Glyco_hydro_39	6.5e-08										GH39	GH39
2062020536	sg4i_00467840	contig05426	Not Binned	2..519(-)	Beta-xylosidase	518bp	173aa	0.67			COG3664	Beta-xylosidase	5e-07	[G] Carbohydrate transport and metabolism	pfam01229	Glyco_hydro_39	9.3e-35										GH39	GH39
2062020567	sg4i_00468150	contig04306	Not Binned	107..1453(-)	hypothetical protein	1347bp	448aa	0.68		Yes																	GH39	GH39
2062025020	sg4i_00512680	contig11864	Not Binned	997..2814(-)	Cellulase (glycosyl hydrolase family 5).	1818bp	605aa	0.7	Yes	Yes					pfam00150	Cellulase	2.3e-10										GH39	GH39
2061987821	sg4i_00140690	contig19270	Not Binned	137..2305(+)	Carbohydrate binding module (family 6)./Glycosyl hydrolases family 39.	2169bp	722aa	0.6							pfam01229; pfam03422; pfam03422	Glyco_hydro_39; CBM_6; CBM_6	1.0e-05; 5.9e-10; 8.1e-08										GH39, CBM35	GH39,CBM35
2062005339	sg4i_00315870	contig15711	Not Binned	3885..4856(-)	ornithine carbamoyltransferase (EC 2.1.3.3)	972bp	323aa	0.62			COG0078	Ornithine carbamoyltransferase		[E] Amino acid transport and metabolism	pfam00185; pfam02729	OTCace; OTCace_N	3.5e-57; 7.7e-48	KO:K00611	ornithine carbamoyltransferase [EC:2.1.3.3]	5e-128	M00042: Urea cycle	TIGR00658	ornithine carbamoyltransferase		2.1.3.3	Ornithine carbamoyltransferase.	GH4
2062030968	sg4i_00572160	contig20593	Not Binned	153..1601(+)	Predicted dehydrogenase	1449bp	482aa	0.7		Yes	COG5322	Predicted dehydrogenase	5e-82	[R] General function prediction only	pfam01488; pfam02660	Shikimate_DH; DUF205	2.1e-11; 5.9e-12										GH4
2061993644	sg4i_00198920	contig01607	Not Binned	45..1442(+)	Alpha-galactosidases/6-phospho-beta-glucosidases, family 4 of glycosyl hydrolases	1398bp	465aa	0.59			COG1486	Alpha-galactosidases/6-phospho-beta-glucosidases, family 4 of glycosyl hydrolases	1e-100	[G] Carbohydrate transport and metabolism	pfam02056; pfam11975	Glyco_hydro_4; Glyco_hydro_4C	7.5e-46; 4.2e-33	KO:K01222	6-phospho-beta-glucosidase [EC:3.2.1.86]	1e-92					3.2.1.86	6-phospho-beta-glucosidase.	GH4	GH4	3.2.1.86
2062016094	sg4i_00423420	contig01175	Not Binned	227..1150(+)	Alpha-galactosidases/6-phospho-beta-glucosidases, family 4 of glycosyl hydrolases	924bp	308aa	0.62			COG1486	Alpha-galactosidases/6-phospho-beta-glucosidases, family 4 of glycosyl hydrolases	6e-94	[G] Carbohydrate transport and metabolism	pfam02056; pfam11975	Glyco_hydro_4; Glyco_hydro_4C	4.9e-65; 2.8e-10										GH4	GH4	3.2.1.86
2062032907	sg4i_00591550	contig13228	Not Binned	7489..8403(+)	Alpha-galactosidases/6-phospho-beta-glucosidases, family 4 of glycosyl hydrolases	915bp	305aa	0.62			COG1486	Alpha-galactosidases/6-phospho-beta-glucosidases, family 4 of glycosyl hydrolases	2e-93	[G] Carbohydrate transport and metabolism	pfam02056; pfam11975	Glyco_hydro_4; Glyco_hydro_4C	4.8e-65; 5.5e-10										GH4	GH4	3.2.1.86
2061998370	sg4i_00246180	contig03114	Not Binned	1..1248(-)	Beta-galactosidase	1248bp	416aa	0.62			COG1874	Beta-galactosidase	9e-12	[G] Carbohydrate transport and metabolism	pfam08532	Glyco_hydro_42M	2.6e-14										GH42
2061979706	sg4i_00059540	contig06787	Not Binned	3..784(-)	Beta-galactosidase	782bp	261aa	0.63			COG1874	Beta-galactosidase	4e-74	[G] Carbohydrate transport and metabolism	pfam02449; pfam08532	Glyco_hydro_42; Glyco_hydro_42M	9.3e-67; 7.8e-24										GH42	GH42	3.2.1.23
2061999462	sg4i_00257100	contig15528	Not Binned	7156..9228(-)	Beta-galactosidase	2073bp	690aa	0.62			COG1874	Beta-galactosidase		[G] Carbohydrate transport and metabolism	pfam02449; pfam08532; pfam08533	Glyco_hydro_42; Glyco_hydro_42M; Glyco_hydro_42C	0.0e+00; 1.7e-70; 2.0e-09	KO:K12308	beta-galactosidase [EC:3.2.1.23]						3.2.1.23	Beta-galactosidase.	GH42	GH42	3.2.1.23
2062023359	sg4i_00496070	contig06611	Not Binned	2..405(-)	Beta-galactosidase	404bp	135aa	0.64			COG1874	Beta-galactosidase	2e-40	[G] Carbohydrate transport and metabolism	pfam02449	Glyco_hydro_42	2e-55										GH42	GH42	3.2.1.23
2062026225	sg4i_00524730	contig00662	Not Binned	27460..29499(+)	Beta-galactosidase	2040bp	679aa	0.64			COG1874	Beta-galactosidase		[G] Carbohydrate transport and metabolism	pfam02449; pfam08532; pfam08533	Glyco_hydro_42; Glyco_hydro_42M; Glyco_hydro_42C	0.0e+00; 4.3e-68; 2.1e-13	KO:K12308; KO:K01190	beta-galactosidase [EC:3.2.1.23]; beta-galactosidase [EC:3.2.1.23]	0.0e+00; 0.0e+00					3.2.1.23	Beta-galactosidase.	GH42	GH42	3.2.1.23
2062028307	sg4i_00545550	contig13953	Not Binned	1..477(+)	Beta-galactosidase	477bp	159aa	0.67			COG1874	Beta-galactosidase	2e-40	[G] Carbohydrate transport and metabolism	pfam02449	Glyco_hydro_42	1.5e-56										GH42	GH42	3.2.1.23
2061978683	sg4i_00049310	contig02942	Not Binned	988..1467(-)	Predicted beta-xylosidase	480bp	159aa	0.65			COG3940	Predicted beta-xylosidase	3e-24	[R] General function prediction only	pfam04616	Glyco_hydro_43	4.5e-17										GH43	GH106,GH43
2061983495	sg4i_00097430	contig18244	Not Binned	355..1266(-)	Glycosyl hydrolases family 43.	912bp	303aa	0.65							pfam04616	Glyco_hydro_43	4.8e-30										GH43	GH43
2062027562	sg4i_00538100	contig04497	Not Binned	1453..2346(+)	Beta-xylosidase	894bp	297aa	0.65			COG3507	Beta-xylosidase	2e-06	[G] Carbohydrate transport and metabolism	pfam04616	Glyco_hydro_43	1.3e-36										GH43	GH43
2061979454	sg4i_00057020	contig05211	Not Binned	513..1859(+)	Beta-xylosidase	1347bp	448aa	0.62			COG3507	Beta-xylosidase	6e-126	[G] Carbohydrate transport and metabolism	pfam04616	Glyco_hydro_43	9.5e-72	KO:K01209; KO:K01198	alpha-N-arabinofuranosidase [EC:3.2.1.55]; xylan 1,4-beta-xylosidase [EC:3.2.1.37]	0.0e+00; 0.0e+00	M00102: UDP-Xylose biosynthesis, UDP-Glc => UDP-Xyl => Xyl				3.2.1.37; 3.2.1.55	Xylan 1,4-beta-xylosidase.; Alpha-N-arabinofuranosidase.	GH43	GH43	3.2.1.37
2061981120	sg4i_00073680	contig06680	Not Binned	10..733(+)	Glycosyl hydrolases family 43.	724bp	241aa	0.64							pfam04616	Glyco_hydro_43	3.3e-17										GH43	GH43	3.2.1.37,3.2.1.55
2062003329	sg4i_00295770	contig08380	Not Binned	171..464(+)	Glycosyl hydrolases family 43.	294bp	97aa	0.6							pfam04616	Glyco_hydro_43	1.1e-07										GH43	GH43	3.2.1.37,3.2.1.55
2062028683	sg4i_00549310	contig02712	Not Binned	3..1148(-)	Glycosyl hydrolases family 43.	1146bp	382aa	0.62							pfam04616	Glyco_hydro_43	1.2e-23										GH43	GH43	3.2.1.37,3.2.1.55
2061989936	sg4i_00161840	contig12567	Not Binned	50..1009(-)	Beta-xylosidase	960bp	319aa	0.59			COG3507	Beta-xylosidase	2e-27	[G] Carbohydrate transport and metabolism	pfam04616	Glyco_hydro_43	2.2e-46	KO:K06113	arabinan endo-1,5-alpha-L-arabinosidase [EC:3.2.1.99]	2e-111					3.2.1.99	Arabinan endo-1,5-alpha-L-arabinosidase.	GH43	GH43	3.2.1.55,3.2.1.99
2061990402	sg4i_00166500	contig12572	Not Binned	183..1142(-)	Beta-xylosidase	960bp	319aa	0.58			COG3507	Beta-xylosidase	3e-27	[G] Carbohydrate transport and metabolism	pfam04616	Glyco_hydro_43	2.5e-46	KO:K06113	arabinan endo-1,5-alpha-L-arabinosidase [EC:3.2.1.99]	3e-111					3.2.1.99	Arabinan endo-1,5-alpha-L-arabinosidase.	GH43	GH43	3.2.1.55,3.2.1.99
2061988871	sg4i_00151190	contig03793	Not Binned	66..1064(+)	Beta-xylosidase	999bp	332aa	0.69	Yes		COG3507	Beta-xylosidase	4e-37	[G] Carbohydrate transport and metabolism	pfam04616	Glyco_hydro_43	3.6e-57	KO:K06113	arabinan endo-1,5-alpha-L-arabinosidase [EC:3.2.1.99]	2e-76					3.2.1.99	Arabinan endo-1,5-alpha-L-arabinosidase.	GH43	GH43	3.2.1.99
2061995587	sg4i_00218350	contig20321	Not Binned	200..1549(+)	Beta-xylosidase	1350bp	449aa	0.59	Yes		COG3507	Beta-xylosidase	5e-29	[G] Carbohydrate transport and metabolism	pfam04616	Glyco_hydro_43	2.6e-49										GH43	GH43	3.2.1.99
2062032505	sg4i_00587530	contig12587	Not Binned	2..301(+)	Glycosyl hydrolases family 43.	300bp	99aa	0.59							pfam04616	Glyco_hydro_43	7.2e-10										GH43	GH43	3.2.1.99
2062037505	sg4i_00637530	contig13287	Not Binned	975..1760(-)	Beta-xylosidase	786bp	261aa	0.67			COG3507	Beta-xylosidase	1e-05	[G] Carbohydrate transport and metabolism	pfam04616	Glyco_hydro_43	5.9e-12										GH43	GH43,GH42
2062016540	sg4i_00427880	contig11652	Not Binned	558..2858(-)	Beta-xylosidase	2301bp	766aa	0.6	Yes		COG3507	Beta-xylosidase	8e-40	[G] Carbohydrate transport and metabolism	pfam03422; pfam04616	CBM_6; Glyco_hydro_43	1.4e-16; 7.9e-44										GH43, CBM6	CBM9,GH43,CBM6	3.2.1.37
2062021778	sg4i_00480260	contig02630	Not Binned	3..2582(+)	Beta-xylosidase	2580bp	859aa	0.68			COG3507	Beta-xylosidase	1e-70	[G] Carbohydrate transport and metabolism	pfam01095; pfam04616	Pectinesterase; Glyco_hydro_43	1.6e-43; 6.2e-70										GH43, CE8	GH43	3.2.1.55
2062032019	sg4i_00582670	contig18032	Not Binned	1..2310(-)	cellulose 1,4-beta-cellobiosidase (EC 3.2.1.91)	2310bp	770aa	0.56	Yes	Yes					pfam02011; pfam02011	Glyco_hydro_48; Glyco_hydro_48	0.0e+00; 4.6e-41										GH48	CBM3,GH48	3.2.1.-
2061981131	sg4i_00073790	contig04438	Not Binned	16..516(-)	hypothetical protein	501bp	167aa	0.71																			GH5
2061984401	sg4i_00106490	contig18249	Not Binned	27781..29367(+)	hypothetical protein	1587bp	529aa	0.67																			GH5
2061985585	sg4i_00118330	contig19257	Not Binned	2..784(-)	hypothetical protein	783bp	261aa	0.66	Yes																		GH5
2062004041	sg4i_00302890	contig01063	Not Binned	1858..3615(-)	Beta-galactosidase.	1758bp	585aa	0.65							pfam02449	Glyco_hydro_42	3e-06										GH5
2062036990	sg4i_00632380	contig00825	Not Binned	263..2050(-)	Glycosyl hydrolase catalytic core.	1788bp	595aa	0.66	Yes						pfam11790	Glyco_hydro_cc	4.9e-09										GH5	GH0
2062017860	sg4i_00441080	contig01865	Not Binned	4768..6243(-)	Endoglucanase	1476bp	491aa	0.61			COG2730	Endoglucanase	3e-24	[G] Carbohydrate transport and metabolism	pfam00150	Cellulase	1.7e-38										GH5	GH5
2062032441	sg4i_00586890	contig10829	Not Binned	3113..4546(-)	Endoglucanase	1434bp	477aa	0.52			COG2730	Endoglucanase	5e-22	[G] Carbohydrate transport and metabolism	pfam00150	Cellulase	5e-33										GH5	GH5
2062034793	sg4i_00610410	contig15568	Not Binned	2..450(-)	hypothetical protein	449bp	149aa	0.61																			GH5	GH5
2062000064	sg4i_00263120	contig00184	Not Binned	234..761(-)	Cellulase (glycosyl hydrolase family 5).	528bp	175aa	0.61							pfam00150	Cellulase	1.2e-10										GH5	GH5	3.2.1.4
2062023578	sg4i_00498260	contig16334	Not Binned	218..745(-)	Cellulase (glycosyl hydrolase family 5).	528bp	175aa	0.61							pfam00150	Cellulase	1.3e-10										GH5	GH5	3.2.1.4
2062006973	sg4i_00332210	contig17362	Not Binned	1..1095(-)	Endoglucanase	1095bp	365aa	0.58			COG2730	Endoglucanase	8e-17	[G] Carbohydrate transport and metabolism	pfam00150; pfam00942	Cellulase; CBM_3	1.1e-49; 3.8e-29										GH5, CBM3	GH5,CBM3	3.2.1.4
2061990256	sg4i_00165040	contig11097	Not Binned	2..1555(+)	Cellulose binding domain./Cellulase (glycosyl hydrolase family 5).	1554bp	518aa	0.62							pfam00150; pfam00942; pfam00942	Cellulase; CBM_3; CBM_3	2.3e-36; 1.1e-24; 6.6e-06										GH5, CBM3	GH5,CBM33,CBM3	3.2.1.78
2062011398	sg4i_00376460	contig04088	Not Binned	1..2643(-)	Cellobiohydrolase A (1,4-beta-cellobiosidase A)	2643bp	881aa	0.57	Yes	Yes	COG5297	Cellobiohydrolase A (1,4-beta-cellobiosidase A)		[G] Carbohydrate transport and metabolism	pfam00150; pfam01341	Cellulase; Glyco_hydro_6	1.4e-62; 1.3e-105										GH5, GH6	GH6,CBM3	3.2.1.91
2062010996	sg4i_00372440	contig15886	Not Binned	3..1256(+)	Beta-galactosidase.	1254bp	417aa	0.59							pfam02449	Glyco_hydro_42	8.5e-09										GH50	GH50	3.2.1.81
2061987352	sg4i_00136000	contig00918	Not Binned	2848..4332(-)	Alpha-L-arabinofuranosidase	1485bp	494aa	0.67			COG3534	Alpha-L-arabinofuranosidase		[G] Carbohydrate transport and metabolism	pfam06964	Alpha-L-AF_C	1.1e-40	KO:K01209	alpha-N-arabinofuranosidase [EC:3.2.1.55]						3.2.1.55	Alpha-N-arabinofuranosidase.	GH51	GH51	3.2.1.55
2061991733	sg4i_00179810	contig18295	Not Binned	12186..13676(-)	Alpha-L-arabinofuranosidase	1491bp	496aa	0.61			COG3534	Alpha-L-arabinofuranosidase		[G] Carbohydrate transport and metabolism	pfam06964	Alpha-L-AF_C	1.4e-42	KO:K01209	alpha-N-arabinofuranosidase [EC:3.2.1.55]						3.2.1.55	Alpha-N-arabinofuranosidase.	GH51	GH51	3.2.1.55
2062001170	sg4i_00274180	contig13693	Not Binned	1622..3121(+)	Alpha-L-arabinofuranosidase	1500bp	499aa	0.64			COG3534	Alpha-L-arabinofuranosidase		[G] Carbohydrate transport and metabolism	pfam06964	Alpha-L-AF_C	1.1e-24	KO:K01209	alpha-N-arabinofuranosidase [EC:3.2.1.55]						3.2.1.55	Alpha-N-arabinofuranosidase.	GH51	GH51	3.2.1.55
2062013517	sg4i_00397650	contig14002	Not Binned	11982..13514(-)	Alpha-L-arabinofuranosidase	1533bp	510aa	0.59			COG3534	Alpha-L-arabinofuranosidase		[G] Carbohydrate transport and metabolism	pfam06964	Alpha-L-AF_C	6.3e-39	KO:K01209	alpha-N-arabinofuranosidase [EC:3.2.1.55]						3.2.1.55	Alpha-N-arabinofuranosidase.	GH51	GH51	3.2.1.55
2062017545	sg4i_00437930	contig01187	Not Binned	2728..4236(+)	Alpha-L-arabinofuranosidase	1509bp	502aa	0.63			COG3534	Alpha-L-arabinofuranosidase		[G] Carbohydrate transport and metabolism	pfam06964	Alpha-L-AF_C	1.1e-41	KO:K01209	alpha-N-arabinofuranosidase [EC:3.2.1.55]						3.2.1.55	Alpha-N-arabinofuranosidase.	GH51	GH51	3.2.1.55
2062026992	sg4i_00532400	contig19558	Not Binned	1985..3526(-)	Alpha-L-arabinofuranosidase	1542bp	513aa	0.6			COG3534	Alpha-L-arabinofuranosidase		[G] Carbohydrate transport and metabolism	pfam06964	Alpha-L-AF_C	1.1e-41	KO:K01209	alpha-N-arabinofuranosidase [EC:3.2.1.55]						3.2.1.55	Alpha-N-arabinofuranosidase.	GH51	GH51	3.2.1.55
2062001061	sg4i_00273090	contig18359	Not Binned	8835..11033(-)	Predicted bile acid beta-glucosidase	2199bp	732aa	0.66	Yes		COG4354	Predicted bile acid beta-glucosidase	9e-06	[G] Carbohydrate transport and metabolism	pfam03512	Glyco_hydro_52											GH52	GH52	3.2.1.37
2062021124	sg4i_00473720	contig02621	Not Binned	2..1504(+)	Glycosyl hydrolase family 52.	1503bp	500aa	0.64							pfam03512	Glyco_hydro_52	7.6e-124										GH52	GH52	3.2.1.37
2062030925	sg4i_00571730	contig13104	Not Binned	1..1488(+)	Glycosyl hydrolase family 52.	1488bp	495aa	0.64							pfam03512	Glyco_hydro_52	8.3e-123										GH52	GH52	3.2.1.37
2061984914	sg4i_00111620	contig05381	Not Binned	41..443(-)	Arabinogalactan endo-1,4-beta-galactosidase	403bp	134aa	0.67			COG3867	Arabinogalactan endo-1,4-beta-galactosidase	4e-29	[G] Carbohydrate transport and metabolism	pfam07745	Glyco_hydro_53	6.6e-40										GH53	GH53	3.2.1.89
2061991726	sg4i_00179740	contig18295	Not Binned	2743..3798(-)	Arabinogalactan endo-1,4-beta-galactosidase	1056bp	351aa	0.64			COG3867	Arabinogalactan endo-1,4-beta-galactosidase	5e-88	[G] Carbohydrate transport and metabolism	pfam07745	Glyco_hydro_53	2.5e-110										GH53	GH53	3.2.1.89
2062005552	sg4i_00318000	contig13808	Not Binned	3963..5492(-)	Arabinogalactan endo-1,4-beta-galactosidase	1530bp	509aa	0.6		Yes	COG3867	Arabinogalactan endo-1,4-beta-galactosidase	1e-74	[G] Carbohydrate transport and metabolism	pfam07745	Glyco_hydro_53	4.4e-85										GH53	GH53	3.2.1.89
2062034537	sg4i_00607850	contig13248	Not Binned	74..1216(-)	Arabinogalactan endo-1,4-beta-galactosidase	1143bp	380aa	0.64			COG3867	Arabinogalactan endo-1,4-beta-galactosidase	2e-42	[G] Carbohydrate transport and metabolism	pfam07745	Glyco_hydro_53	4e-61	KO:K01224	arabinogalactan endo-1,4-beta-galactosidase [EC:3.2.1.89]						3.2.1.89	Arabinogalactan endo-1,4-beta-galactosidase.	GH53	GH53	3.2.1.89
2062034632	sg4i_00608800	contig13249	Not Binned	49..1032(-)	Arabinogalactan endo-1,4-beta-galactosidase	984bp	327aa	0.63			COG3867	Arabinogalactan endo-1,4-beta-galactosidase	5e-24	[G] Carbohydrate transport and metabolism	pfam07745	Glyco_hydro_53	9.5e-37										GH53	GH53	3.2.1.89
2062021880	sg4i_00481280	contig00764	Not Binned	2388..5729(-)	Arabinogalactan endo-1,4-beta-galactosidase	3342bp	1113aa	0.63	Yes	Yes	COG3867	Arabinogalactan endo-1,4-beta-galactosidase	1e-114	[G] Carbohydrate transport and metabolism	pfam00041; pfam00395; pfam00395; pfam00395; pfam07532; pfam07745	fn3; SLH; SLH; SLH; Big_4; Glyco_hydro_53	2.9e-07; 1.3e-11; 1.2e-10; 2.5e-07; 2.0e-12; 2.5e-122										GH53, CBM61, SLH	GH53	3.2.1.89
2062006463	sg4i_00327110	contig00478	Not Binned	1..2136(-)	Uncharacterized protein contain chitin-binding domain type 3	2136bp	712aa	0.63			COG3979	Uncharacterized protein contain chitin-binding domain type 3	1e-08	[R] General function prediction only	pfam00041	fn3	1.7e-09										GH55, CBM32	GH0,CBM32	3.2.1.39
2061977855	sg4i_00041030	contig13322	Not Binned	3..782(+)	Uncharacterized conserved protein	780bp	259aa	0.77			COG1543	Uncharacterized conserved protein	1e-34	[S] Function unknown	pfam09210	DUF1957	2.4e-07										GH57	GH57
2062007710	sg4i_00339580	contig04279	Not Binned	3..669(-)	Alpha-amylase/alpha-mannosidase	667bp	223aa	0.64			COG1449	Alpha-amylase/alpha-mannosidase	1e-10	[G] Carbohydrate transport and metabolism	pfam03065	Glyco_hydro_57	2.6e-12										GH57	GH57
2062016749	sg4i_00429970	contig02814	Not Binned	32..2038(-)	Alpha-amylase/alpha-mannosidase	2007bp	668aa	0.68			COG1449	Alpha-amylase/alpha-mannosidase	8e-13	[G] Carbohydrate transport and metabolism	pfam03065; pfam12055	Glyco_hydro_57; DUF3536	8.1e-23; 1.9e-109										GH57	GH57
2062029355	sg4i_00556030	contig14454	Not Binned	293..1990(+)	Domain of unknown function (DUF3536).	1698bp	566aa	0.65							pfam12055	DUF3536	1.9e-101										GH57	GH57
2061994613	sg4i_00208610	contig15909	Not Binned	8..568(-)	(1->4)-alpha-D-glucan branching enzyme	561bp	187aa	0.71			COG1543	Uncharacterized conserved protein	7e-33	[S] Function unknown	pfam03065	Glyco_hydro_57	6.6e-26										GH57	GH57	2.4.1.18
2061995769	sg4i_00220170	contig13583	Not Binned	1..1140(-)	hypothetical protein	1140bp	380aa	0.6																			GH59	GH59,CBM6
2062026250	sg4i_00524980	contig00662	Not Binned	53916..55223(+)	Domain of Unknown Function (DUF1080)./Pectate lyase.	1308bp	435aa	0.61	Yes	Yes					pfam03211; pfam06439	Pectate_lyase; DUF1080	1.4e-74; 2.0e-07										GH59, PL3	PL3	4.2.2.2
2062004275	sg4i_00305230	contig06510	Not Binned	3..752(+)	Cellobiohydrolase A (1,4-beta-cellobiosidase A)	750bp	249aa	0.79			COG5297	Cellobiohydrolase A (1,4-beta-cellobiosidase A)	3e-11	[G] Carbohydrate transport and metabolism	pfam01341	Glyco_hydro_6	3.7e-33										GH6	GH6
2062010704	sg4i_00369520	contig19930	Not Binned	513..1760(+)	Neutral trehalase	1248bp	415aa	0.7			COG1626	Neutral trehalase	2e-09	[G] Carbohydrate transport and metabolism	pfam01204	Trehalase	1.8e-10										GH63	GH63
2061989781	sg4i_00160290	contig03801	Not Binned	2..1132(-)	Trehalose and maltose hydrolases (possible phosphorylases)	1131bp	377aa	0.69			COG1554	Trehalose and maltose hydrolases (possible phosphorylases)	5e-121	[G] Carbohydrate transport and metabolism	pfam03632	Glyco_hydro_65m	1.1e-103										GH65	GH65	2.4.1.230
2061991473	sg4i_00177210	contig18293	Not Binned	11116..13401(-)	Trehalose and maltose hydrolases (possible phosphorylases)	2286bp	761aa	0.65			COG1554	Trehalose and maltose hydrolases (possible phosphorylases)		[G] Carbohydrate transport and metabolism	pfam03632; pfam03636	Glyco_hydro_65m; Glyco_hydro_65N	4.9e-93; 3.9e-18	KO:K10231	kojibiose phosphorylase [EC:2.4.1.230]						2.4.1.230	Kojibiose phosphorylase.	GH65	GH65	2.4.1.230
2061991474	sg4i_00177220	contig18293	Not Binned	13376..15115(-)	Trehalose and maltose hydrolases (possible phosphorylases)	1740bp	579aa	0.61			COG1554	Trehalose and maltose hydrolases (possible phosphorylases)		[G] Carbohydrate transport and metabolism	pfam03632; pfam03633	Glyco_hydro_65m; Glyco_hydro_65C	6.0e-110; 4.7e-11										GH65	GH65	2.4.1.64
2061983125	sg4i_00093730	contig13418	Not Binned	2..835(+)	hypothetical protein	834bp	278aa	0.63																			GH66	GH66	3.2.1.11
2061984382	sg4i_00106300	contig18249	Not Binned	7679..9736(-)	alpha-glucuronidase (EC:3.2.1.139)	2058bp	685aa	0.65			COG3661	Alpha-glucuronidase		[G] Carbohydrate transport and metabolism	pfam03648; pfam07477; pfam07488	Glyco_hydro_67N; Glyco_hydro_67C; Glyco_hydro_67M	1.6e-22; 2.4e-97; 0.0e+00	KO:K01235	alpha-glucuronidase [EC:3.2.1.139]						3.2.1.139	Alpha-glucuronidase.	GH67	GH67	3.2.1.139
2062024495	sg4i_00507430	contig02663	Not Binned	2..1897(-)	Alpha-glucuronidase	1896bp	632aa	0.69			COG3661	Alpha-glucuronidase		[G] Carbohydrate transport and metabolism	pfam03648; pfam07477; pfam07488	Glyco_hydro_67N; Glyco_hydro_67C; Glyco_hydro_67M	2.0e-17; 1.9e-81; 3.7e-126	KO:K01235	alpha-glucuronidase [EC:3.2.1.139]						3.2.1.139	Alpha-glucuronidase.	GH67	GH67	3.2.1.139
2062021545	sg4i_00477930	contig08885	Not Binned	14..415(-)	Beta- N-acetylglucosaminidase	402bp	134aa	0.59			COG4193	Beta- N-acetylglucosaminidase	1e-06	[G] Carbohydrate transport and metabolism	pfam01832	Glucosaminidase	4.6e-13										GH73
2062033777	sg4i_00600250	contig04943	Not Binned	157..471(+)	Beta- N-acetylglucosaminidase	315bp	105aa	0.65			COG4193	Beta- N-acetylglucosaminidase	2e-07	[G] Carbohydrate transport and metabolism	pfam01832	Glucosaminidase	4.1e-11										GH73
2062034720	sg4i_00609680	contig02124	Not Binned	1135..1854(-)	Muramidase (flagellum-specific)	720bp	239aa	0.48			COG1705	Muramidase (flagellum-specific)	8e-40	[N] Cell motility; [U] Intracellular trafficking, secretion, and vesicular transport	pfam01832	Glucosaminidase	3.8e-36										GH73	GH73	3.2.1.-
2061984344	sg4i_00105920	contig01528	Not Binned	27..1031(-)	BNR/Asp-box repeat.	1005bp	334aa	0.73			COG4447	Uncharacterized protein related to plant photosystem II stability/assembly factor	1e-09	[R] General function prediction only	pfam02012; pfam02012; pfam02012; pfam02012; pfam02012	BNR; BNR; BNR; BNR; BNR	1.1e-01; 1.6e-01; 3.1e-01; 3.8e+00; 4.9e+00										GH74
2061995551	sg4i_00217990	contig17148	Not Binned	781..2364(-)	BNR/Asp-box repeat.	1584bp	527aa	0.7	Yes						pfam02012; pfam02012; pfam02012; pfam02012; pfam02012; pfam02012	BNR; BNR; BNR; BNR; BNR; BNR	7.0e-02; 9.8e-02; 1.4e-01; 2.3e-01; 7.4e-01; 1.4e+01										GH74
2061997410	sg4i_00236580	contig18335	Not Binned	772..1584(-)	hypothetical protein	813bp	270aa	0.62																			GH74
2062021066	sg4i_00473140	contig19010	Not Binned	1754..3337(-)	BNR/Asp-box repeat.	1584bp	527aa	0.69	Yes						pfam02012; pfam02012; pfam02012; pfam02012; pfam02012; pfam02012	BNR; BNR; BNR; BNR; BNR; BNR	7.0e-02; 1.4e-01; 2.3e-01; 3.2e-01; 7.4e-01; 1.5e+00										GH74
2062028153	sg4i_00544010	contig18568	Not Binned	7898..8491(-)	BNR/Asp-box repeat.	594bp	197aa	0.62	Yes	Yes					pfam02012; pfam02012; pfam02012	BNR; BNR; BNR	3.2e-03; 5.0e-03; 4.1e-02										GH74
2062025438	sg4i_00516860	contig18547	Not Binned	6304..9144(+)	Predicted solute binding protein	2841bp	947aa	0.63	Yes	Yes	COG3889	Predicted solute binding protein	2e-06	[R] General function prediction only	pfam00942; pfam02012; pfam02012; pfam02012; pfam02012; pfam02012; pfam02012; pfam02012; pfam02012; pfam02012	CBM_3; BNR; BNR; BNR; BNR; BNR; BNR; BNR; BNR; BNR	1.6e-28; 3.9e-02; 6.0e-02; 6.3e-01; 6.4e-01; 7.2e-01; 9.9e-01; 2.1e+00; 5.6e+00; 1.3e+01										GH74, CBM3	GH74,CBM3	3.2.1.151
2062010750	sg4i_00369980	contig01124	Not Binned	91..1140(-)	Predicted glycosyl hydrolase	1050bp	349aa	0.69			COG4833	Predicted glycosyl hydrolase	1e-12	[G] Carbohydrate transport and metabolism	pfam03663	Glyco_hydro_76	2.2e-40										GH76	GH76
2062016504	sg4i_00427520	contig14019	Not Binned	16..518(-)	4-alpha-glucanotransferase	503bp	168aa	0.68			COG1640	4-alpha-glucanotransferase	3e-06	[G] Carbohydrate transport and metabolism													GH77	GH77
2062033457	sg4i_00597050	contig20163	Not Binned	3..548(+)	4-alpha-glucanotransferase	546bp	181aa	0.68			COG1640	4-alpha-glucanotransferase	8e-39	[G] Carbohydrate transport and metabolism	pfam02446	Glyco_hydro_77	1.6e-42										GH77	GH77	2.4.1.25
2062037105	sg4i_00633530	contig03651	Not Binned	2..1669(-)	Glycogen debranching enzyme	1668bp	556aa	0.66			COG3408	Glycogen debranching enzyme	2e-88	[G] Carbohydrate transport and metabolism	pfam06202	GDE_C	5.8e-12										GH78	GH0
2061991563	sg4i_00178110	contig03822	Not Binned	3..1694(-)	Alpha-L-rhamnosidase N-terminal domain./Bacterial alpha-L-rhamnosidase.	1692bp	564aa	0.71	Yes						pfam05592; pfam08531	Bac_rhamnosid; Bac_rhamnosid_N	0.0e+00; 1.1e-24										GH78	GH78	3.2.1.40
2062005332	sg4i_00315800	contig13804	Not Binned	922..3825(+)	Alpha-L-rhamnosidase N-terminal domain./Bacterial alpha-L-rhamnosidase.	2904bp	967aa	0.65							pfam05592; pfam08531	Bac_rhamnosid; Bac_rhamnosid_N	0.0e+00; 1.9e-64	KO:K05989	alpha-L-rhamnosidase [EC:3.2.1.40]						3.2.1.40	Alpha-L-rhamnosidase.	GH78	GH78	3.2.1.40
2062005531	sg4i_00317790	contig02456	Not Binned	29..1915(-)	Alpha-L-rhamnosidase N-terminal domain./Bacterial alpha-L-rhamnosidase.	1887bp	628aa	0.63							pfam05592; pfam08531	Bac_rhamnosid; Bac_rhamnosid_N	3.6e-88; 9.9e-42										GH78	GH78	3.2.1.40
2062008354	sg4i_00346020	contig02483	Not Binned	4255..5340(-)	Bacterial alpha-L-rhamnosidase.	1086bp	361aa	0.64							pfam05592	Bac_rhamnosid	1.1e-86										GH78	GH78	3.2.1.40
2062020640	sg4i_00468880	contig08746	Not Binned	2..519(-)	Bacterial alpha-L-rhamnosidase.	518bp	172aa	0.66							pfam05592	Bac_rhamnosid	3.1e-71										GH78	GH78	3.2.1.40
2062029052	sg4i_00553000	contig06872	Not Binned	1..507(+)	Bacterial alpha-L-rhamnosidase.	507bp	169aa	0.66							pfam05592	Bac_rhamnosid	2.5e-59										GH78	GH78	3.2.1.40
2061990326	sg4i_00165740	contig07546	Not Binned	3..614(+)	Endoglucanase Y	612bp	204aa	0.66			COG3405	Endoglucanase Y	1e-37	[G] Carbohydrate transport and metabolism													GH8	GH8	3.2.1.156
2062001823	sg4i_00280710	contig06668	Not Binned	2..511(+)	Endoglucanase Y	510bp	170aa	0.65			COG3405	Endoglucanase Y	2e-26	[G] Carbohydrate transport and metabolism	pfam01270	Glyco_hydro_8	1.5e-05										GH8	GH8	3.2.1.156
2062027867	sg4i_00541150	contig00675	Not Binned	1941..3107(+)	Endoglucanase Y	1167bp	388aa	0.57			COG3405	Endoglucanase Y	3e-78	[G] Carbohydrate transport and metabolism	pfam01270	Glyco_hydro_8	1e-23	KO:K01179	endoglucanase [EC:3.2.1.4]						3.2.1.4	Cellulase.	GH8	GH8	3.2.1.156
2061996164	sg4i_00224120	contig19326	Not Binned	314..3844(+)	Predicted glycosyl hydrolase	3531bp	1177aa	0.58	Yes		COG5498	Predicted glycosyl hydrolase	6e-65	[M] Cell wall/membrane/envelope biogenesis	pfam00041; pfam00754; pfam00754; pfam03639	fn3; F5_F8_type_C; F5_F8_type_C; Glyco_hydro_81	1.6e-08; 5.9e-22; 4.6e-20; 4.9e-53										GH81, CBM32	CBM13,GH81	3.2.1.39
2062000323	sg4i_00265710	contig00432	Not Binned	2..2500(-)	Uncharacterized conserved protein	2499bp	833aa	0.62	Yes		COG1572	Uncharacterized conserved protein	1e-14	[S] Function unknown	pfam00754; pfam07705; pfam07705	F5_F8_type_C; CARDB; CARDB	6.1e-13; 8.7e-26; 1.3e-06										GH87	GH87,CBM32,CBM35	3.2.1.59
2062014072	sg4i_00403200	contig04137	Not Binned	3577..4239(+)	F5/8 type C domain.	663bp	221aa	0.62	Yes	Yes					pfam00754	F5_F8_type_C	7.4e-22										GH87	GH87,CBM32,CBM35	3.2.1.59
2061983515	sg4i_00097630	contig18244	Not Binned	26288..27427(-)	Glycosyl Hydrolase Family 88.	1140bp	379aa	0.64							pfam07470	Glyco_hydro_88	3.3e-26										GH88	GH88	3.2.1.-
2061990903	sg4i_00171510	contig15284	Not Binned	455..1528(+)	Glycosyl Hydrolase Family 88.	1074bp	358aa	0.67							pfam07470	Glyco_hydro_88	2.8e-30										GH88	GH88	3.2.1.-
2062002381	sg4i_00286290	contig05933	Not Binned	1464..2609(-)	Predicted unsaturated glucuronyl hydrolase involved in regulation of bacterial surface properties, and related proteins	1146bp	381aa	0.61			COG4225	Predicted unsaturated glucuronyl hydrolase involved in regulation of bacterial surface properties, and related proteins	6e-07	[R] General function prediction only	pfam07470	Glyco_hydro_88	8.1e-56										GH88	GH88	3.2.1.-
2062007752	sg4i_00340000	contig06149	Not Binned	3..929(-)	Glycosyl Hydrolase Family 88.	927bp	309aa	0.66							pfam07470	Glyco_hydro_88	1.8e-30										GH88	GH88	3.2.1.-
2062021746	sg4i_00479940	contig02296	Not Binned	2..664(+)	Glycosyl hydrolase family 9.	663bp	221aa	0.47							pfam00759	Glyco_hydro_9	2.2e-10										GH9
2061996459	sg4i_00227070	contig17163	Not Binned	365..1819(-)	Glycosyl hydrolase family 9.	1455bp	484aa	0.68							pfam00759	Glyco_hydro_9	0.00013										GH9	GH0
2061990116	sg4i_00163640	contig02297	Not Binned	185..1669(+)	Glycosyl hydrolase family 9./N-terminal ig-like domain of cellulase.	1485bp	495aa	0.48	Yes						pfam00759; pfam02927	Glyco_hydro_9; CelD_N	9.5e-42; 3.8e-08										GH9	GH9
2061989454	sg4i_00157020	contig13474	Not Binned	2..1204(+)	Glycosyl hydrolase family 9.	1203bp	400aa	0.66							pfam00759	Glyco_hydro_9	2.8e-72	KO:K01179	endoglucanase [EC:3.2.1.4]	3e-127					3.2.1.4	Cellulase.	GH9	GH9	3.2.1.4
2062019276	sg4i_00455240	contig03727	Not Binned	5..592(+)	Glycosyl hydrolase family 9.	588bp	196aa	0.7	Yes						pfam00759	Glyco_hydro_9	5.2e-38										GH9	GH9	3.2.1.4
2062032612	sg4i_00588600	contig05327	Not Binned	7..516(+)	Glycosyl hydrolase family 9.	510bp	170aa	0.72	Yes						pfam00759	Glyco_hydro_9	9.3e-25										GH9	GH9	3.2.1.4
2061998357	sg4i_00246050	contig00417	Not Binned	8055..10358(+)	Predicted solute binding protein	2304bp	768aa	0.6	Yes		COG3889	Predicted solute binding protein	4e-11	[R] General function prediction only	pfam00759; pfam00942	Glyco_hydro_9; CBM_3	0.0e+00; 5.0e-23	KO:K01179	endoglucanase [EC:3.2.1.4]						3.2.1.4	Cellulase.	GH9, CBM3	GH9,CBM3	3.2.1.4
2061990684	sg4i_00169320	contig19117	Not Binned	3939..4709(+)	Glycosyl hydrolase family 9./N-terminal ig-like domain of cellulase.	771bp	257aa	0.65							pfam00759; pfam02927	Glyco_hydro_9; CelD_N	5.0e-44; 3.6e-09										GH9, CBM30	GH9	3.2.1.4
2062016312	sg4i_00425600	contig00568	Not Binned	9128..10756(+)	Glycosyl hydrolase family 9./N-terminal ig-like domain of cellulase.	1629bp	542aa	0.65							pfam00759; pfam02927	Glyco_hydro_9; CelD_N	1.2e-70; 2.6e-11	KO:K01179	endoglucanase [EC:3.2.1.4]	3e-87					3.2.1.4	Cellulase.	GH9, CBM30	GH9	3.2.1.4
2061974345	sg4i_00005930	contig03670	Not Binned	1814..2998(-)	BNR/Asp-box repeat.	1185bp	394aa	0.62	Yes						pfam02012; pfam02012; pfam02012; pfam02012	BNR; BNR; BNR; BNR	1.2e-01; 2.0e-01; 1.1e+00; 5.9e+00										GH93
2061974346	sg4i_00005940	contig03670	Not Binned	2995..3699(-)	BNR/Asp-box repeat.	705bp	234aa	0.62							pfam02012; pfam02012; pfam02012	BNR; BNR; BNR	9.3e-03; 2.3e-01; 2.6e-01										GH93
2062001030	sg4i_00272780	contig12700	Not Binned	766..1164(-)	hypothetical protein	399bp	132aa	0.62																			GH93
2062001171	sg4i_00274190	contig13693	Not Binned	3305..3826(+)	BNR/Asp-box repeat.	522bp	174aa	0.62	Yes						pfam02012; pfam02012	BNR; BNR	4.2e-03; 5.5e-02										GH93
2062033849	sg4i_00600970	contig10851	Not Binned	2113..3282(-)	BNR/Asp-box repeat.	1170bp	389aa	0.67	Yes						pfam02012; pfam02012; pfam02012; pfam02012	BNR; BNR; BNR; BNR	6.2e-02; 3.7e-01; 9.4e-01; 1.8e+00										GH93
2061996491	sg4i_00227390	contig19828	Not Binned	2962..3573(-)	hypothetical protein	612bp	203aa	0.61																			GH93	GH93,CBM13	3.2.1.-
2061999162	sg4i_00254100	contig01659	Not Binned	3..1829(+)	Cellobiose phosphorylase	1827bp	608aa	0.65			COG3459	Cellobiose phosphorylase		[G] Carbohydrate transport and metabolism	pfam06205	GT36_AF	6.2e-18										GH94	GT84,GH94	2.4.1.-
2061999654	sg4i_00259020	contig01662	Not Binned	433..2319(+)	Cellobiose phosphorylase	1887bp	629aa	0.65			COG3459	Cellobiose phosphorylase		[G] Carbohydrate transport and metabolism	pfam06165; pfam06205	Glyco_transf_36; GT36_AF	1.1e-22; 2.5e-20										GH94	GT84,GH94	2.4.1.-
2061999554	sg4i_00258020	contig01661	Not Binned	3..3581(+)	Cellobiose phosphorylase	3579bp	1193aa	0.65	Yes	Yes	COG3459	Cellobiose phosphorylase	8e-42	[G] Carbohydrate transport and metabolism	pfam06165; pfam06204; pfam06204; pfam06205; pfam10091	Glyco_transf_36; CBM_X; CBM_X; GT36_AF; DUF2329	4.1e-34; 2.7e-18; 1.6e-13; 8.2e-15; 1.2e-59										GH94, GT84	GT84,GH94	2.4.1.-
2061982386	sg4i_00086340	contig10518	Not Binned	2..747(-)	hypothetical protein	746bp	249aa	0.7																			GH95	GH1,GH95	3.2.1.63
2061999650	sg4i_00258980	contig01021	Not Binned	604..2448(-)	hypothetical protein	1845bp	614aa	0.6			COG1554	Trehalose and maltose hydrolases (possible phosphorylases)	1e-06	[G] Carbohydrate transport and metabolism													GH95	GH95	3.2.1.63
2062000868	sg4i_00271160	contig07233	Not Binned	10..747(+)	hypothetical protein	738bp	246aa	0.68																			GH95	GH95	3.2.1.63
2062001678	sg4i_00279260	contig20364	Not Binned	3..2228(+)	hypothetical protein	2226bp	742aa	0.69																			GH95	GH95	3.2.1.63
2062001802	sg4i_00280500	contig20365	Not Binned	271..2100(+)	hypothetical protein	1830bp	610aa	0.69																			GH95	GH95	3.2.1.63
2062001852	sg4i_00281000	contig05919	Not Binned	2..1183(+)	hypothetical protein	1182bp	394aa	0.67																			GH95	GH95	3.2.1.63
2062006222	sg4i_00324700	contig13120	Not Binned	215..2980(+)	hypothetical protein	2766bp	921aa	0.7	Yes																		GH95	GH95	3.2.1.63
2062010575	sg4i_00368230	contig18429	Not Binned	5647..7986(-)	hypothetical protein	2340bp	779aa	0.66																			GH95	GH95	3.2.1.63
2062018542	sg4i_00447900	contig03329	Not Binned	524..2293(-)	hypothetical protein	1770bp	589aa	0.7	Yes																		GH95	GH95	3.2.1.63
2062000225	sg4i_00264730	contig11291	Not Binned	3..1520(+)	Glycosyl hydrolase family 71.	1518bp	505aa	0.64							pfam03659	Glyco_hydro_71	2.8e-05										GH99	GH39
2062001417	sg4i_00276650	contig18362	Not Binned	4685..5626(+)	hypothetical protein	942bp	313aa	0.43	Yes	Yes																	GT11
2061980498	sg4i_00067460	contig00870	Not Binned	32418..33653(+)	UDP-N-Acetylglucosamine 2-epimerase (EC 5.1.3.14)	1236bp	411aa	0.63			COG0381	UDP-N-acetylglucosamine 2-epimerase	4e-130	[M] Cell wall/membrane/envelope biogenesis	pfam02350	Epimerase_2	2.7e-106	KO:K01791	UDP-N-acetylglucosamine 2-epimerase [EC:5.1.3.14]		M00101: UDP-N-Acetylgalactosamine and UDP-N-acetylmannosamine biosynthesis; M00104: CMP-N-Acetylneuraminate biosynthesis (mammals), ManNAc => Neu5Ac-9P => CMP-Neu5Ac	TIGR00236	UDP-N-acetylglucosamine 2-epimerase		5.1.3.14	UDP-N-acetylglucosamine 2-epimerase.	GT19
2062015667	sg4i_00419150	contig04176	Not Binned	415..1494(+)	UDP-N-acetylglucosamine 2-epimerase	1080bp	359aa	0.74	Yes		COG0381	UDP-N-acetylglucosamine 2-epimerase	1e-90	[M] Cell wall/membrane/envelope biogenesis	pfam02350	Epimerase_2	5.4e-98	KO:K01791	UDP-N-acetylglucosamine 2-epimerase [EC:5.1.3.14]	5e-107	M00101: UDP-N-Acetylgalactosamine and UDP-N-acetylmannosamine biosynthesis; M00104: CMP-N-Acetylneuraminate biosynthesis (mammals), ManNAc => Neu5Ac-9P => CMP-Neu5Ac	TIGR00236	UDP-N-acetylglucosamine 2-epimerase	1.6e-100	5.1.3.14	UDP-N-acetylglucosamine 2-epimerase.	GT19
2061975550	sg4i_00017980	contig01467	Not Binned	2..445(-)	Predicted glycosyltransferases	444bp	148aa	0.67	Yes		COG1216	Predicted glycosyltransferases	7e-19	[R] General function prediction only	pfam00535	Glycos_transf_2	1.2e-16										GT2
2061980048	sg4i_00062960	contig08182	Not Binned	2817..3092(+)	Glycosyltransferases involved in cell wall biogenesis	276bp	92aa	0.75			COG0463	Glycosyltransferases involved in cell wall biogenesis	6e-18	[M] Cell wall/membrane/envelope biogenesis	pfam00535	Glycos_transf_2	5.3e-25										GT2
2061982015	sg4i_00082630	contig06226	Not Binned	56..469(-)	Predicted glycosyltransferases	414bp	138aa	0.7			COG1216	Predicted glycosyltransferases	5e-09	[R] General function prediction only	pfam00535	Glycos_transf_2	3.1e-11										GT2
2061982447	sg4i_00086950	contig16891	Not Binned	2..505(-)	Predicted glycosyltransferases	504bp	168aa	0.65			COG1216	Predicted glycosyltransferases	9e-08	[R] General function prediction only	pfam00535	Glycos_transf_2	1.7e-17										GT2
2061987541	sg4i_00137890	contig08499	Not Binned	949..1257(+)	Predicted glycosyltransferases	309bp	103aa	0.72			COG1216	Predicted glycosyltransferases	1e-10	[R] General function prediction only	pfam00535	Glycos_transf_2	1.7e-17										GT2
2061989856	sg4i_00161040	contig08302	Not Binned	3..956(-)	Glycosyltransferases involved in cell wall biogenesis	954bp	318aa	0.38			COG0463	Glycosyltransferases involved in cell wall biogenesis	2e-10	[M] Cell wall/membrane/envelope biogenesis	pfam00535	Glycos_transf_2	8.3e-29										GT2
2061994536	sg4i_00207840	contig08851	Not Binned	2919..3122(+)	Glycosyltransferases involved in cell wall biogenesis	204bp	68aa	0.74			COG0463	Glycosyltransferases involved in cell wall biogenesis	4e-10	[M] Cell wall/membrane/envelope biogenesis	pfam00535	Glycos_transf_2	2.6e-13										GT2
2062000044	sg4i_00262920	contig19353	Not Binned	2497..3495(+)	Glycosyltransferases involved in cell wall biogenesis	999bp	332aa	0.36			COG0463	Glycosyltransferases involved in cell wall biogenesis	2e-06	[M] Cell wall/membrane/envelope biogenesis	pfam00535	Glycos_transf_2	1e-10										GT2
2062001100	sg4i_00273480	contig04093	Not Binned	372..575(+)	Predicted glycosyltransferases	204bp	68aa	0.75			COG1216	Predicted glycosyltransferases	3e-08	[R] General function prediction only	pfam00535	Glycos_transf_2	2.8e-09										GT2
2062001974	sg4i_00282220	contig03946	Not Binned	2591..2881(+)	Glycosyltransferases involved in cell wall biogenesis	291bp	97aa	0.7			COG0463	Glycosyltransferases involved in cell wall biogenesis	1e-06	[M] Cell wall/membrane/envelope biogenesis	pfam00535	Glycos_transf_2	1e-09										GT2
2062004325	sg4i_00305730	contig09386	Not Binned	56..1021(-)	Glycosyltransferases involved in cell wall biogenesis	966bp	321aa	0.71			COG0463	Glycosyltransferases involved in cell wall biogenesis	6e-08	[M] Cell wall/membrane/envelope biogenesis	pfam00535	Glycos_transf_2	1.6e-14										GT2
2062012257	sg4i_00385050	contig08344	Not Binned	3..598(-)	Predicted glycosyltransferases	596bp	199aa	0.77	Yes		COG1216	Predicted glycosyltransferases	2e-14	[R] General function prediction only	pfam00535	Glycos_transf_2	2.6e-13										GT2
2062015183	sg4i_00414310	contig07645	Not Binned	103..471(-)	Glycosyltransferases involved in cell wall biogenesis	369bp	123aa	0.76	Yes		COG0463	Glycosyltransferases involved in cell wall biogenesis	1e-14	[M] Cell wall/membrane/envelope biogenesis	pfam00535	Glycos_transf_2	2.2e-26										GT2
2062017889	sg4i_00441370	contig14146	Not Binned	159..845(+)	Glycosyltransferases, probably involved in cell wall biogenesis	687bp	228aa	0.69			COG1215	Glycosyltransferases, probably involved in cell wall biogenesis	3e-17	[M] Cell wall/membrane/envelope biogenesis	pfam00535	Glycos_transf_2	1.5e-32										GT2
2062017890	sg4i_00441380	contig14146	Not Binned	859..1629(+)	Glycosyltransferases involved in cell wall biogenesis	771bp	257aa	0.67			COG0463	Glycosyltransferases involved in cell wall biogenesis	1e-17	[M] Cell wall/membrane/envelope biogenesis	pfam00535	Glycos_transf_2	1.3e-27										GT2
2062020746	sg4i_00469940	contig00606	Not Binned	3..242(-)	Glycosyltransferases involved in cell wall biogenesis	240bp	80aa	0.66	Yes		COG0463	Glycosyltransferases involved in cell wall biogenesis	1e-08	[M] Cell wall/membrane/envelope biogenesis	pfam00535	Glycos_transf_2	5.7e-11										GT2
2062023191	sg4i_00494390	contig14294	Not Binned	1238..2071(-)	Glycosyltransferases involved in cell wall biogenesis	834bp	277aa	0.64			COG0463	Glycosyltransferases involved in cell wall biogenesis	6e-11	[M] Cell wall/membrane/envelope biogenesis	pfam00535	Glycos_transf_2	9.6e-12										GT2
2062035159	sg4i_00614070	contig15577	Not Binned	50..400(-)	Predicted glycosyltransferases	351bp	117aa	0.72			COG1216	Predicted glycosyltransferases	5e-07	[R] General function prediction only	pfam00535	Glycos_transf_2	1.9e-15										GT2
2062035248	sg4i_00614960	contig20177	Not Binned	8..661(+)	Predicted glycosyltransferases	654bp	217aa	0.65			COG1216	Predicted glycosyltransferases	3e-07	[R] General function prediction only	pfam00535	Glycos_transf_2	3e-17										GT2
2061991680	sg4i_00179280	contig03047	Not Binned	1382..2281(+)	Glycosyltransferases involved in cell wall biogenesis	900bp	299aa	0.71	Yes		COG0463	Glycosyltransferases involved in cell wall biogenesis	8e-10	[M] Cell wall/membrane/envelope biogenesis	pfam00535	Glycos_transf_2	1.8e-13										GT2	GT0
2062002803	sg4i_00290510	contig01701	Not Binned	4198..5550(+)	Glycosyltransferases involved in cell wall biogenesis	1353bp	451aa	0.57			COG0463	Glycosyltransferases involved in cell wall biogenesis	3e-12	[M] Cell wall/membrane/envelope biogenesis	pfam00535	Glycos_transf_2	2.8e-20										GT2	GT0,GT2	2.4.1.-
2062005549	sg4i_00317970	contig13808	Not Binned	400..1698(+)	Glycosyltransferases involved in cell wall biogenesis	1299bp	432aa	0.58			COG0463	Glycosyltransferases involved in cell wall biogenesis	2e-12	[M] Cell wall/membrane/envelope biogenesis	pfam00535	Glycos_transf_2	2.3e-20										GT2	GT0,GT2	2.4.1.-
2061973782	sg4i_00000300	contig10699	Not Binned	1080..1877(-)	Glycosyltransferases involved in cell wall biogenesis	798bp	265aa	0.67			COG0463	Glycosyltransferases involved in cell wall biogenesis	5e-17	[M] Cell wall/membrane/envelope biogenesis	pfam00535	Glycos_transf_2	2.5e-28										GT2	GT2
2061975938	sg4i_00021860	contig04782	Not Binned	141..542(+)	Glycosyltransferases, probably involved in cell wall biogenesis	402bp	134aa	0.58	Yes	Yes	COG1215	Glycosyltransferases, probably involved in cell wall biogenesis	2e-08	[M] Cell wall/membrane/envelope biogenesis	pfam00535	Glycos_transf_2	8.7e-08										GT2	GT2
2061978861	sg4i_00051090	contig08136	Not Binned	1788..3263(+)	Glycosyltransferases, probably involved in cell wall biogenesis	1476bp	491aa	0.59		Yes	COG1215	Glycosyltransferases, probably involved in cell wall biogenesis	2e-32	[M] Cell wall/membrane/envelope biogenesis	pfam00535	Glycos_transf_2	1.1e-11										GT2	GT2
2061979923	sg4i_00061710	contig14982	Not Binned	959..2059(+)	Glycosyltransferases, probably involved in cell wall biogenesis	1101bp	366aa	0.69		Yes	COG1215	Glycosyltransferases, probably involved in cell wall biogenesis	2e-19	[M] Cell wall/membrane/envelope biogenesis	pfam00535	Glycos_transf_2	2.3e-24										GT2	GT2
2061980046	sg4i_00062940	contig08182	Not Binned	836..1810(-)	Predicted glycosyltransferases	975bp	324aa	0.74			COG1216	Predicted glycosyltransferases	3e-23	[R] General function prediction only	pfam00535	Glycos_transf_2	3.9e-30										GT2	GT2
2061983058	sg4i_00093060	contig12430	Not Binned	1..516(-)	Glycosyltransferases involved in cell wall biogenesis	516bp	172aa	0.71	Yes	Yes	COG0463	Glycosyltransferases involved in cell wall biogenesis	3e-14	[M] Cell wall/membrane/envelope biogenesis	pfam00535	Glycos_transf_2	1.2e-16										GT2	GT2
2061983876	sg4i_00101240	contig06156	Not Binned	282..695(-)	Glycosyltransferases involved in cell wall biogenesis	414bp	138aa	0.69			COG0463	Glycosyltransferases involved in cell wall biogenesis	2e-18	[M] Cell wall/membrane/envelope biogenesis	pfam00535	Glycos_transf_2	7.3e-31										GT2	GT2
2061986171	sg4i_00124190	contig01548	Not Binned	3050..4213(-)	Glycosyltransferases, probably involved in cell wall biogenesis	1164bp	387aa	0.59	Yes	Yes	COG1215	Glycosyltransferases, probably involved in cell wall biogenesis	4e-22	[M] Cell wall/membrane/envelope biogenesis	pfam00535	Glycos_transf_2	1.9e-30										GT2	GT2
2061986883	sg4i_00131310	contig04401	Not Binned	2..504(-)	Glycosyltransferases, probably involved in cell wall biogenesis	503bp	168aa	0.77			COG1215	Glycosyltransferases, probably involved in cell wall biogenesis	6e-10	[M] Cell wall/membrane/envelope biogenesis	pfam00535	Glycos_transf_2	2.5e-21										GT2	GT2
2061987999	sg4i_00142470	contig07631	Not Binned	179..616(+)	Predicted glycosyltransferases	438bp	146aa	0.66			COG1216	Predicted glycosyltransferases	5e-25	[R] General function prediction only	pfam00535	Glycos_transf_2	7.4e-27										GT2	GT2
2061988653	sg4i_00149010	contig07314	Not Binned	2..538(+)	Glycosyltransferases involved in cell wall biogenesis	537bp	178aa	0.68			COG0463	Glycosyltransferases involved in cell wall biogenesis	3e-07	[M] Cell wall/membrane/envelope biogenesis	pfam00535	Glycos_transf_2	5.7e-15										GT2	GT2
2061989400	sg4i_00156480	contig04804	Not Binned	158..892(+)	Predicted glycosyltransferases	735bp	245aa	0.73			COG1216	Predicted glycosyltransferases	8e-30	[R] General function prediction only	pfam00535	Glycos_transf_2	2.3e-24										GT2	GT2
2061993059	sg4i_00193070	contig00965	Not Binned	2351..3106(+)	Glycosyl transferase family 2.	756bp	251aa	0.67		Yes					pfam00535	Glycos_transf_2	6.2e-10	KO:K00721	dolichol-phosphate mannosyltransferase [EC:2.4.1.83]	1e-38					2.4.1.83	Dolichyl-phosphate beta-D-mannosyltransferase.	GT2	GT2
2061995766	sg4i_00220140	contig11207	Not Binned	2119..3270(+)	Glycosyltransferases involved in cell wall biogenesis	1152bp	383aa	0.59			COG0463	Glycosyltransferases involved in cell wall biogenesis	1e-10	[M] Cell wall/membrane/envelope biogenesis	pfam00535	Glycos_transf_2	2.8e-19										GT2	GT2
2061995767	sg4i_00220150	contig11207	Not Binned	3267..4865(+)	Predicted glycosyltransferases	1599bp	533aa	0.67			COG1216	Predicted glycosyltransferases	4e-38	[R] General function prediction only	pfam00535; pfam08241	Glycos_transf_2; Methyltransf_11	5.9e-28; 1.1e-06										GT2	GT2
2062000043	sg4i_00262910	contig19353	Not Binned	1202..2425(+)	Predicted glycosyltransferases	1224bp	407aa	0.31			COG1216	Predicted glycosyltransferases	2e-27	[R] General function prediction only	pfam00535	Glycos_transf_2	1.7e-29										GT2	GT2
2062000223	sg4i_00264710	contig05861	Not Binned	2027..2854(-)	Glycosyltransferases, probably involved in cell wall biogenesis	828bp	275aa	0.73		Yes	COG1215	Glycosyltransferases, probably involved in cell wall biogenesis	6e-14	[M] Cell wall/membrane/envelope biogenesis	pfam00535	Glycos_transf_2	8.6e-11										GT2	GT2
2062001431	sg4i_00276790	contig18862	Not Binned	3696..4454(+)	Predicted glycosyltransferases	759bp	252aa	0.48		Yes	COG1216	Predicted glycosyltransferases	2e-10	[R] General function prediction only	pfam00535	Glycos_transf_2	1.4e-14										GT2	GT2
2062003562	sg4i_00298100	contig02063	Not Binned	1372..1842(+)	Glycosyltransferases involved in cell wall biogenesis	471bp	156aa	0.63	Yes		COG0463	Glycosyltransferases involved in cell wall biogenesis	1e-12	[M] Cell wall/membrane/envelope biogenesis	pfam00535	Glycos_transf_2	1e-15										GT2	GT2
2062005284	sg4i_00315320	contig15580	Not Binned	132..466(+)	Glycosyltransferases involved in cell wall biogenesis	335bp	112aa	0.68			COG0463	Glycosyltransferases involved in cell wall biogenesis	1e-11	[M] Cell wall/membrane/envelope biogenesis	pfam00535	Glycos_transf_2	2.5e-17										GT2	GT2
2062005376	sg4i_00316240	contig03071	Not Binned	95..820(-)	Glycosyltransferases involved in cell wall biogenesis	726bp	241aa	0.68			COG0463	Glycosyltransferases involved in cell wall biogenesis	1e-13	[M] Cell wall/membrane/envelope biogenesis	pfam00535	Glycos_transf_2	1.8e-20										GT2	GT2
2062006257	sg4i_00325050	contig03542	Not Binned	2..553(-)	Glycosyltransferases involved in cell wall biogenesis	552bp	184aa	0.69			COG0463	Glycosyltransferases involved in cell wall biogenesis	1e-12	[M] Cell wall/membrane/envelope biogenesis	pfam00535	Glycos_transf_2	4.4e-20										GT2	GT2
2062008898	sg4i_00351460	contig03528	Not Binned	9..308(-)	Predicted glycosyltransferases	300bp	100aa	0.68			COG1216	Predicted glycosyltransferases	6e-21	[R] General function prediction only	pfam00535	Glycos_transf_2	1e-26										GT2	GT2
2062009135	sg4i_00353830	contig00499	Not Binned	1028..1768(-)	Predicted glycosyltransferases	741bp	246aa	0.6			COG1216	Predicted glycosyltransferases	5e-45	[R] General function prediction only	pfam00535	Glycos_transf_2	8.6e-30										GT2	GT2
2062009137	sg4i_00353850	contig00499	Not Binned	2561..3349(-)	Glycosyltransferases involved in cell wall biogenesis	789bp	262aa	0.68			COG0463	Glycosyltransferases involved in cell wall biogenesis	5e-15	[M] Cell wall/membrane/envelope biogenesis	pfam00535	Glycos_transf_2	2.4e-21										GT2	GT2
2062014973	sg4i_00412210	contig00554	Not Binned	8648..9493(-)	Predicted glycosyltransferases	846bp	281aa	0.63			COG1216	Predicted glycosyltransferases	2e-16	[R] General function prediction only	pfam00535	Glycos_transf_2	2.2e-29										GT2	GT2
2062015496	sg4i_00417440	contig19635	Not Binned	2214..3173(+)	Glycosyltransferases involved in cell wall biogenesis	960bp	319aa	0.65		Yes	COG0463	Glycosyltransferases involved in cell wall biogenesis	2e-22	[M] Cell wall/membrane/envelope biogenesis	pfam00535	Glycos_transf_2	1.9e-33	KO:K00721	dolichol-phosphate mannosyltransferase [EC:2.4.1.83]	2e-124					2.4.1.83	Dolichyl-phosphate beta-D-mannosyltransferase.	GT2	GT2
2062015922	sg4i_00421700	contig18471	Not Binned	4233..4976(-)	Glycosyltransferases involved in cell wall biogenesis	744bp	247aa	0.72			COG0463	Glycosyltransferases involved in cell wall biogenesis	7e-14	[M] Cell wall/membrane/envelope biogenesis	pfam00535	Glycos_transf_2	2e-16	KO:K00721	dolichol-phosphate mannosyltransferase [EC:2.4.1.83]	3e-36					2.4.1.83	Dolichyl-phosphate beta-D-mannosyltransferase.	GT2	GT2
2062016484	sg4i_00427320	contig20992	Not Binned	3..788(+)	Predicted glycosyltransferases	786bp	261aa	0.58			COG1216	Predicted glycosyltransferases	1e-09	[R] General function prediction only	pfam00535	Glycos_transf_2	1.1e-13										GT2	GT2
2062018795	sg4i_00450430	contig06691	Not Binned	3091..3882(+)	Predicted glycosyltransferases	792bp	263aa	0.61			COG1216	Predicted glycosyltransferases	2e-13	[R] General function prediction only	pfam00535	Glycos_transf_2	1.2e-10										GT2	GT2
2062021836	sg4i_00480840	contig19517	Not Binned	507..911(+)	Glycosyltransferases involved in cell wall biogenesis	405bp	134aa	0.58			COG0463	Glycosyltransferases involved in cell wall biogenesis	4e-11	[M] Cell wall/membrane/envelope biogenesis	pfam00535	Glycos_transf_2	9.6e-19										GT2	GT2
2062022827	sg4i_00490750	contig01239	Not Binned	1594..2880(-)	Predicted glycosyltransferases	1287bp	428aa	0.65			COG1216	Predicted glycosyltransferases	3e-34	[R] General function prediction only	pfam00535	Glycos_transf_2	2.1e-29										GT2	GT2
2062022959	sg4i_00492070	contig12988	Not Binned	1480..1881(+)	Glycosyltransferases involved in cell wall biogenesis	402bp	134aa	0.6			COG0463	Glycosyltransferases involved in cell wall biogenesis	6e-09	[M] Cell wall/membrane/envelope biogenesis	pfam00535	Glycos_transf_2	3.1e-18										GT2	GT2
2062025315	sg4i_00515630	contig07036	Not Binned	2..874(+)	Glycosyltransferases, probably involved in cell wall biogenesis	873bp	290aa	0.6		Yes	COG1215	Glycosyltransferases, probably involved in cell wall biogenesis	1e-29	[M] Cell wall/membrane/envelope biogenesis	pfam00535	Glycos_transf_2	4.1e-06										GT2	GT2
2062028116	sg4i_00543640	contig01977	Not Binned	1172..2059(+)	Predicted glycosyltransferases	888bp	295aa	0.62		Yes	COG1216	Predicted glycosyltransferases	5e-22	[R] General function prediction only	pfam00535	Glycos_transf_2	1.5e-35										GT2	GT2
2062028482	sg4i_00547300	contig17814	Not Binned	3..395(-)	Glycosyltransferases involved in cell wall biogenesis	393bp	131aa	0.73			COG0463	Glycosyltransferases involved in cell wall biogenesis	2e-13	[M] Cell wall/membrane/envelope biogenesis	pfam00535	Glycos_transf_2	3.8e-15										GT2	GT2
2062028581	sg4i_00548290	contig10584	Not Binned	1182..2312(-)	Glycosyltransferases involved in cell wall biogenesis	1131bp	376aa	0.71	Yes	Yes	COG0463	Glycosyltransferases involved in cell wall biogenesis	1e-14	[M] Cell wall/membrane/envelope biogenesis	pfam00535	Glycos_transf_2	6.2e-25										GT2	GT2
2062029420	sg4i_00556680	contig01993	Not Binned	792..1520(-)	Glycosyltransferases, probably involved in cell wall biogenesis	729bp	242aa	0.61			COG1215	Glycosyltransferases, probably involved in cell wall biogenesis	1e-18	[M] Cell wall/membrane/envelope biogenesis	pfam00535	Glycos_transf_2	3.3e-31										GT2	GT2
2062030609	sg4i_00568570	contig14512	Not Binned	285..1028(+)	Predicted glycosyltransferases	744bp	248aa	0.58			COG1216	Predicted glycosyltransferases	7e-11	[R] General function prediction only	pfam00535	Glycos_transf_2	4.9e-21										GT2	GT2
2062031454	sg4i_00577020	contig10706	Not Binned	557..1456(-)	Glycosyltransferases involved in cell wall biogenesis	900bp	299aa	0.61			COG0463	Glycosyltransferases involved in cell wall biogenesis	5e-18	[M] Cell wall/membrane/envelope biogenesis	pfam00535	Glycos_transf_2	8e-31										GT2	GT2
2062031711	sg4i_00579590	contig06166	Not Binned	9..380(-)	Glycosyltransferases involved in cell wall biogenesis	372bp	124aa	0.44			COG0463	Glycosyltransferases involved in cell wall biogenesis	3e-15	[M] Cell wall/membrane/envelope biogenesis	pfam00535	Glycos_transf_2	5.1e-28										GT2	GT2
2062033380	sg4i_00596280	contig00140	Not Binned	4137..5030(-)	Predicted glycosyltransferases	894bp	297aa	0.57			COG1216	Predicted glycosyltransferases	1e-29	[R] General function prediction only	pfam00535	Glycos_transf_2	4.1e-27										GT2	GT2
2062036728	sg4i_00629760	contig16717	Not Binned	460..1332(-)	Predicted glycosyltransferases	873bp	290aa	0.68			COG1216	Predicted glycosyltransferases	2e-38	[R] General function prediction only	pfam00535	Glycos_transf_2	6.8e-31										GT2	GT2
2061974516	sg4i_00007640	contig18699	Not Binned	6652..7968(+)	Membrane glycosyltransferase	1317bp	438aa	0.62		Yes	COG2943	Membrane glycosyltransferase	2e-97	[M] Cell wall/membrane/envelope biogenesis	pfam00535	Glycos_transf_2	2.2e-06	KO:K03669	membrane glycosyltransferase [EC:2.4.1.-]						2.4.1.-	Transferases. Glycosyltransferases. Hexosyltransferases.	GT2	GT2	2.4.1.-
2061975567	sg4i_00018150	contig10913	Not Binned	594..1367(-)	Glycosyltransferases involved in cell wall biogenesis	774bp	257aa	0.64		Yes	COG0463	Glycosyltransferases involved in cell wall biogenesis	1e-09	[M] Cell wall/membrane/envelope biogenesis	pfam00535	Glycos_transf_2	8.6e-11	KO:K00721	dolichol-phosphate mannosyltransferase [EC:2.4.1.83]	1e-85					2.4.1.83	Dolichyl-phosphate beta-D-mannosyltransferase.	GT2	GT2	2.4.1.-
2061980703	sg4i_00069510	contig07387	Not Binned	130..1374(+)	Glycosyltransferases, probably involved in cell wall biogenesis	1245bp	414aa	0.56	Yes	Yes	COG1215	Glycosyltransferases, probably involved in cell wall biogenesis	2e-44	[M] Cell wall/membrane/envelope biogenesis	pfam00535	Glycos_transf_2	1.5e-24										GT2	GT2	2.4.1.-
2061983728	sg4i_00099760	contig10997	Not Binned	3235..3966(+)	Glycosyltransferases involved in cell wall biogenesis	732bp	243aa	0.67			COG0463	Glycosyltransferases involved in cell wall biogenesis	1e-14	[M] Cell wall/membrane/envelope biogenesis	pfam00535	Glycos_transf_2	5.3e-30	KO:K00721	dolichol-phosphate mannosyltransferase [EC:2.4.1.83]	3e-94					2.4.1.83	Dolichyl-phosphate beta-D-mannosyltransferase.	GT2	GT2	2.4.1.-
2061985515	sg4i_00117630	contig00905	Not Binned	7671..8696(+)	Glycosyltransferases involved in cell wall biogenesis	1026bp	341aa	0.58		Yes	COG0463	Glycosyltransferases involved in cell wall biogenesis	1e-24	[M] Cell wall/membrane/envelope biogenesis	pfam00535	Glycos_transf_2	3e-34	KO:K00721	dolichol-phosphate mannosyltransferase [EC:2.4.1.83]	7e-124					2.4.1.83	Dolichyl-phosphate beta-D-mannosyltransferase.	GT2	GT2	2.4.1.-
2061989753	sg4i_00160010	contig00937	Not Binned	2393..3313(+)	Predicted glycosyltransferases	921bp	306aa	0.71			COG1216	Predicted glycosyltransferases	3e-41	[R] General function prediction only	pfam00535	Glycos_transf_2	7e-20										GT2	GT2	2.4.1.-
2061989754	sg4i_00160020	contig00937	Not Binned	3306..4838(+)	Predicted glycosyltransferases	1533bp	510aa	0.72			COG1216	Predicted glycosyltransferases	9e-24	[R] General function prediction only	pfam00535; pfam00535	Glycos_transf_2; Glycos_transf_2	7.8e-29; 5.8e-14										GT2	GT2	2.4.1.-
2061996540	sg4i_00227880	contig02368	Not Binned	1006..2079(+)	Glycosyltransferases involved in cell wall biogenesis	1074bp	357aa	0.7		Yes	COG0463	Glycosyltransferases involved in cell wall biogenesis	8e-22	[M] Cell wall/membrane/envelope biogenesis	pfam00535	Glycos_transf_2	1.2e-30										GT2	GT2	2.4.1.-
2062002801	sg4i_00290490	contig01701	Not Binned	719..2743(+)	Glycosyltransferases involved in cell wall biogenesis	2025bp	674aa	0.6			COG0463	Glycosyltransferases involved in cell wall biogenesis	1e-10	[M] Cell wall/membrane/envelope biogenesis	pfam00535; pfam03704	Glycos_transf_2; BTAD	5.6e-17; 1.7e-04										GT2	GT2	2.4.1.-
2062002802	sg4i_00290500	contig01701	Not Binned	2703..4175(+)	Glycosyltransferases involved in cell wall biogenesis	1473bp	490aa	0.59			COG0463	Glycosyltransferases involved in cell wall biogenesis	8e-15	[M] Cell wall/membrane/envelope biogenesis	pfam00535	Glycos_transf_2	1.8e-24										GT2	GT2	2.4.1.-
2062006412	sg4i_00326600	contig18628	Not Binned	3260..4369(-)	Glycosyltransferases involved in cell wall biogenesis	1110bp	369aa	0.66	Yes	Yes	COG0463	Glycosyltransferases involved in cell wall biogenesis	1e-20	[M] Cell wall/membrane/envelope biogenesis	pfam00535	Glycos_transf_2	2.1e-28										GT2	GT2	2.4.1.-
2062022958	sg4i_00492060	contig12988	Not Binned	525..1343(+)	Glycosyltransferases, probably involved in cell wall biogenesis	819bp	272aa	0.56			COG1215	Glycosyltransferases, probably involved in cell wall biogenesis	9e-09	[M] Cell wall/membrane/envelope biogenesis	pfam00535	Glycos_transf_2	1e-09										GT2	GT2	2.4.1.-
2062037469	sg4i_00637170	contig07610	Not Binned	144..515(+)	Glycosyltransferases involved in cell wall biogenesis	372bp	124aa	0.43			COG0463	Glycosyltransferases involved in cell wall biogenesis	8e-20	[M] Cell wall/membrane/envelope biogenesis	pfam00535	Glycos_transf_2	1.4e-34										GT2	GT2	2.4.1.-
2062022822	sg4i_00490700	contig00629	Not Binned	3728..4330(+)	Glycosyltransferases, probably involved in cell wall biogenesis	603bp	201aa	0.61	Yes	Yes	COG1215	Glycosyltransferases, probably involved in cell wall biogenesis	3e-18	[M] Cell wall/membrane/envelope biogenesis	pfam00535	Glycos_transf_2	6.8e-22										GT2	GT2	2.4.1.12
2061980880	sg4i_00071280	contig20228	Not Binned	1419..2309(-)	Glycosyltransferases involved in cell wall biogenesis	891bp	296aa	0.72		Yes	COG0463	Glycosyltransferases involved in cell wall biogenesis	1e-12	[M] Cell wall/membrane/envelope biogenesis	pfam00535	Glycos_transf_2	3.8e-15										GT2, GT21	GT2
2061976158	sg4i_00024060	contig10920	Not Binned	1410..2870(+)	trehalose 6-phosphate synthase (EC 2.4.1.15)	1461bp	486aa	0.69			COG0380	Trehalose-6-phosphate synthase	1e-97	[G] Carbohydrate transport and metabolism	pfam00982	Glyco_transf_20	2.4e-115	KO:K00697	alpha,alpha-trehalose-phosphate synthase (UDP-forming) [EC:2.4.1.15]						2.4.1.15	Alpha,alpha-trehalose-phosphate synthase (UDP-forming).	GT20	GT20	2.4.1.15
2062030690	sg4i_00569380	contig03484	Not Binned	443..1615(+)	Trehalose-6-phosphate synthase	1173bp	391aa	0.71			COG0380	Trehalose-6-phosphate synthase	3e-99	[G] Carbohydrate transport and metabolism	pfam00982	Glyco_transf_20	1.5e-100										GT20	GT20	2.4.1.15
2062031509	sg4i_00577570	contig03820	Not Binned	15..506(+)	Trehalose-6-phosphate synthase	492bp	164aa	0.69			COG0380	Trehalose-6-phosphate synthase	1e-37	[G] Carbohydrate transport and metabolism	pfam00982	Glyco_transf_20	1.3e-43										GT20	GT20	2.4.1.15
2061985523	sg4i_00117710	contig03759	Not Binned	3..1259(-)	transcription-repair coupling factor	1257bp	419aa	0.72			COG1197	Transcription-repair coupling factor (superfamily II helicase)		[K] Transcription; [L] Replication, recombination and repair	pfam00270; pfam00271; pfam03461	DEAD; Helicase_C; TRCF	4.3e-14; 1.3e-10; 1.7e-09					TIGR00580	transcription-repair coupling factor (mfd)	9.9e-35			GT26
2062011396	sg4i_00376440	contig02513	Not Binned	1345..1617(+)	Short-chain dehydrogenases of various substrate specificities	273bp	91aa	0.69	Yes		COG0300	Short-chain dehydrogenases of various substrate specificities	3e-16	[R] General function prediction only	pfam00106	adh_short	3.4e-17										GT26
2062018498	sg4i_00447460	contig08104	Not Binned	8..676(+)	urea-binding protein	669bp	223aa	0.66			COG0683	ABC-type branched-chain amino acid transport systems, periplasmic component	5e-44	[E] Amino acid transport and metabolism	pfam01094	ANF_receptor	4.7e-05										GT26
2062010143	sg4i_00363910	contig20426	Not Binned	323..775(+)	Teichoic acid biosynthesis proteins	453bp	150aa	0.66			COG1922	Teichoic acid biosynthesis proteins	2e-21	[M] Cell wall/membrane/envelope biogenesis	pfam03808	Glyco_tran_WecB	3.4e-14										GT26	GT26
2062010144	sg4i_00363920	contig20426	Not Binned	703..1110(+)	bacterial polymer biosynthesis proteins, WecB/TagA/CpsF family	408bp	135aa	0.62			COG1922	Teichoic acid biosynthesis proteins	3e-35	[M] Cell wall/membrane/envelope biogenesis	pfam03808	Glyco_tran_WecB	3.7e-45					TIGR00696	bacterial polymer biosynthesis proteins, WecB/TagA/CpsF family	2.4e-16			GT26	GT26
2062015217	sg4i_00414650	contig10085	Not Binned	3..746(-)	bacterial polymer biosynthesis proteins, WecB/TagA/CpsF family	744bp	248aa	0.74			COG1922	Teichoic acid biosynthesis proteins	5e-53	[M] Cell wall/membrane/envelope biogenesis	pfam03808	Glyco_tran_WecB	2.1e-60	KO:K05946; KO:K02852	N-acetylglucosaminyldiphosphoundecaprenol [EC:2.4.1.187]; UDP-N-acetyl-D-mannosaminuronic acid transferase [EC:2.4.1.-]	2.0e-66; 2.0e-66		TIGR00696	bacterial polymer biosynthesis proteins, WecB/TagA/CpsF family	4.1e-54	2.4.1.-; 2.4.1.187	Transferases. Glycosyltransferases. Hexosyltransferases.; N-acetylglucosaminyldiphosphoundecaprenol N-acetyl-beta-D- mannosaminyltransferase.	GT26	GT26
2062027140	sg4i_00533880	contig02694	Not Binned	4765..5304(+)	Teichoic acid biosynthesis proteins	540bp	180aa	0.69			COG1922	Teichoic acid biosynthesis proteins	1e-42	[M] Cell wall/membrane/envelope biogenesis	pfam03808	Glyco_tran_WecB	1.1e-39	KO:K05946	N-acetylglucosaminyldiphosphoundecaprenol [EC:2.4.1.187]	7e-35		TIGR00696	bacterial polymer biosynthesis proteins, WecB/TagA/CpsF family	3.6e-06	2.4.1.187	N-acetylglucosaminyldiphosphoundecaprenol N-acetyl-beta-D- mannosaminyltransferase.	GT26	GT26
2061992061	sg4i_00183090	contig15852	Not Binned	4..447(+)	N-acetylmannosaminyltransferase (EC 2.4.1.187)	444bp	148aa	0.7			COG1922	Teichoic acid biosynthesis proteins	1e-35	[M] Cell wall/membrane/envelope biogenesis	pfam03808	Glyco_tran_WecB	7.2e-46					TIGR00696	bacterial polymer biosynthesis proteins, WecB/TagA/CpsF family	1.5e-20			GT26	GT26	2.4.1.-
2062001424	sg4i_00276720	contig18362	Not Binned	10865..11656(+)	bacterial polymer biosynthesis proteins, WecB/TagA/CpsF family	792bp	263aa	0.61			COG1922	Teichoic acid biosynthesis proteins	5e-60	[M] Cell wall/membrane/envelope biogenesis	pfam03808	Glyco_tran_WecB	1.7e-61	KO:K05946; KO:K02852	N-acetylglucosaminyldiphosphoundecaprenol [EC:2.4.1.187]; UDP-N-acetyl-D-mannosaminuronic acid transferase [EC:2.4.1.-]	2.0e-91; 2.0e-91		TIGR00696	bacterial polymer biosynthesis proteins, WecB/TagA/CpsF family	1.4e-62	2.4.1.-; 2.4.1.187	Transferases. Glycosyltransferases. Hexosyltransferases.; N-acetylglucosaminyldiphosphoundecaprenol N-acetyl-beta-D- mannosaminyltransferase.	GT26	GT26	2.4.1.-
2061997360	sg4i_00236080	contig00410	Not Binned	2361..3152(+)	bacterial polymer biosynthesis proteins, WecB/TagA/CpsF family	792bp	263aa	0.65			COG1922	Teichoic acid biosynthesis proteins	5e-64	[M] Cell wall/membrane/envelope biogenesis	pfam03808	Glyco_tran_WecB	2.8e-64	KO:K05946	N-acetylglucosaminyldiphosphoundecaprenol [EC:2.4.1.187]	3e-73		TIGR00696	bacterial polymer biosynthesis proteins, WecB/TagA/CpsF family	9.9e-53	2.4.1.187	N-acetylglucosaminyldiphosphoundecaprenol N-acetyl-beta-D- mannosaminyltransferase.	GT26	GT26	2.4.1.187
2061999067	sg4i_00253150	contig03910	Not Binned	3..1070(+)	Glycosyltransferases, probably involved in cell wall biogenesis	1068bp	355aa	0.7	Yes		COG1215	Glycosyltransferases, probably involved in cell wall biogenesis	4e-13	[M] Cell wall/membrane/envelope biogenesis	pfam00535	Glycos_transf_2	1.6e-13										GT27	GT2
2062030089	sg4i_00563370	contig10649	Not Binned	191..1015(+)	Predicted glycosyltransferases	825bp	274aa	0.73			COG1216	Predicted glycosyltransferases	7e-27	[R] General function prediction only	pfam00535	Glycos_transf_2	2.2e-21										GT27	GT2
2061979000	sg4i_00052480	contig04715	Not Binned	3..248(-)	UDP-N-acetylglucosamine--N-acetylmuramyl-(pentapeptide) pyrophosphoryl-undecaprenol N-acetylglucosamine transferase (EC 2.4.1.227)	246bp	82aa	0.66			COG0707	UDP-N-acetylglucosamine:LPS N-acetylglucosamine transferase	3e-10	[M] Cell wall/membrane/envelope biogenesis	pfam04101	Glyco_tran_28_C	2.9e-10										GT28
2062009112	sg4i_00353600	contig05413	Not Binned	571..795(-)	UDP-N-acetylglucosamine--N-acetylmuramyl-(pentapeptide) pyrophosphoryl-undecaprenol N-acetylglucosamine transferase (EC 2.4.1.227)	225bp	74aa	0.76			COG0707	UDP-N-acetylglucosamine:LPS N-acetylglucosamine transferase	2e-14	[M] Cell wall/membrane/envelope biogenesis	pfam04101	Glyco_tran_28_C	1.9e-06										GT28
2061980367	sg4i_00066150	contig18226	Not Binned	7420..8502(+)	UDP-N-acetylglucosamine--N-acetylmuramyl-(pentapeptide) pyrophosphoryl-undecaprenol N-acetylglucosamine transferase (EC 2.4.1.227)	1083bp	360aa	0.63			COG0707	UDP-N-acetylglucosamine:LPS N-acetylglucosamine transferase	6e-79	[M] Cell wall/membrane/envelope biogenesis	pfam03033; pfam04101	Glyco_transf_28; Glyco_tran_28_C	2.5e-31; 3.1e-25	KO:K02563	UDP-N-acetylglucosamine--N-acetylmuramyl-(pentapeptide) pyrophosphoryl-undecaprenol N-acetylglucosamine transferase [EC:2.4.1.227]	1e-107		TIGR01133	undecaprenyldiphospho-muramoylpentapeptide beta-N-acetylglucosaminyltransferase	2.1e-87	2.4.1.227	Undecaprenyldiphospho-muramoylpentapeptide beta-N- acetylglucosaminyltransferase.	GT28	GT28
2062015056	sg4i_00413040	contig14262	Not Binned	2..459(-)	UDP-N-acetylglucosamine--N-acetylmuramyl-(pentapeptide) pyrophosphoryl-undecaprenol N-acetylglucosamine transferase (EC 2.4.1.227)	458bp	153aa	0.67			COG0707	UDP-N-acetylglucosamine:LPS N-acetylglucosamine transferase	4e-25	[M] Cell wall/membrane/envelope biogenesis	pfam04101	Glyco_tran_28_C	2.7e-23										GT28	GT28
2062024649	sg4i_00508970	contig19539	Not Binned	1588..2778(+)	UDP-N-acetylglucosamine--N-acetylmuramyl-(pentapeptide) pyrophosphoryl-undecaprenol N-acetylglucosamine transferase (EC 2.4.1.227)	1191bp	396aa	0.71			COG0707	UDP-N-acetylglucosamine:LPS N-acetylglucosamine transferase	1e-81	[M] Cell wall/membrane/envelope biogenesis	pfam03033; pfam04101	Glyco_transf_28; Glyco_tran_28_C	1.1e-28; 5.9e-33	KO:K02563	UDP-N-acetylglucosamine--N-acetylmuramyl-(pentapeptide) pyrophosphoryl-undecaprenol N-acetylglucosamine transferase [EC:2.4.1.227]			TIGR01133	undecaprenyldiphospho-muramoylpentapeptide beta-N-acetylglucosaminyltransferase	5.8e-116	2.4.1.227	Undecaprenyldiphospho-muramoylpentapeptide beta-N- acetylglucosaminyltransferase.	GT28	GT28
2062020114	sg4i_00463620	contig04291	Not Binned	15807..16982(-)	UDP-N-acetylglucosamine:LPS N-acetylglucosamine transferase	1176bp	391aa	0.62			COG0707	UDP-N-acetylglucosamine:LPS N-acetylglucosamine transferase	3e-39	[M] Cell wall/membrane/envelope biogenesis	pfam04101; pfam06925	Glyco_tran_28_C; MGDG_synth	2.3e-08; 6.1e-30	KO:K03429	1,2-diacylglycerol 3-glucosyltransferase [EC:2.4.1.157]	3e-66	M00203: Glyceroglycolipid biosynthesis				2.4.1.157	1,2-diacylglycerol 3-glucosyltransferase.	GT28	GT28	2.4.1.157
2061999185	sg4i_00254330	contig13657	Not Binned	2..1450(+)	Dolichyl-phosphate-mannose-protein mannosyltransferase.	1449bp	483aa	0.75	Yes	Yes					pfam02366	PMT	4.5e-07										GT39
2062023345	sg4i_00495930	contig08702	Not Binned	2..805(+)	hypothetical protein	804bp	268aa	0.72		Yes																	GT39
2062036774	sg4i_00630220	contig03264	Not Binned	11..493(+)	Dolichyl-phosphate-mannose--protein O-mannosyl transferase	483bp	161aa	0.6		Yes	COG1928	Dolichyl-phosphate-mannose--protein O-mannosyl transferase	1e-12	[O] Posttranslational modification, protein turnover, chaperones	pfam02366	PMT	1.8e-13										GT39
2061991507	sg4i_00177550	contig08618	Not Binned	3..836(-)	Dolichyl-phosphate-mannose--protein O-mannosyl transferase	834bp	278aa	0.69		Yes	COG1928	Dolichyl-phosphate-mannose--protein O-mannosyl transferase	3e-30	[O] Posttranslational modification, protein turnover, chaperones	pfam02366	PMT	9e-25										GT39	GT39	2.4.1.109
2061985514	sg4i_00117620	contig00905	Not Binned	4523..7648(+)	Dolichyl-phosphate-mannose--protein O-mannosyl transferase	3126bp	1041aa	0.58	Yes	Yes	COG1928	Dolichyl-phosphate-mannose--protein O-mannosyl transferase	3e-19	[O] Posttranslational modification, protein turnover, chaperones	pfam02366; pfam09594	PMT; DUF2029	2.6e-15; 8.4e-10										GT39, CBM32	GT39	2.4.1.109
2061977963	sg4i_00042110	contig05836	Not Binned	586..900(-)	Glycosyltransferase	315bp	104aa	0.78			COG0438	Glycosyltransferase	5e-19	[M] Cell wall/membrane/envelope biogenesis	pfam00534	Glycos_transf_1	8.7e-18										GT4
2061978690	sg4i_00049380	contig05200	Not Binned	1..573(-)	Glycosyltransferase	573bp	191aa	0.74			COG0438	Glycosyltransferase	4e-23	[M] Cell wall/membrane/envelope biogenesis	pfam00534	Glycos_transf_1	1.5e-33										GT4
2061978691	sg4i_00049390	contig05200	Not Binned	1096..1404(-)	Glycosyltransferase	309bp	102aa	0.72	Yes		COG0438	Glycosyltransferase	1e-11	[M] Cell wall/membrane/envelope biogenesis	pfam00534	Glycos_transf_1	2.9e-09										GT4
2061982701	sg4i_00089490	contig08787	Not Binned	346..780(-)	Glycosyltransferase	435bp	144aa	0.69			COG0438	Glycosyltransferase	6e-11	[M] Cell wall/membrane/envelope biogenesis	pfam00534	Glycos_transf_1	7.7e-07										GT4
2061986151	sg4i_00123990	contig16547	Not Binned	2..282(-)	hypothetical protein	281bp	93aa	0.62	Yes																		GT4
2061991501	sg4i_00177490	contig20293	Not Binned	1..1053(+)	Glycosyltransferase	1053bp	350aa	0.7			COG0438	Glycosyltransferase	5e-18	[M] Cell wall/membrane/envelope biogenesis	pfam00534	Glycos_transf_1	1.8e-10										GT4
2061997674	sg4i_00239220	contig07660	Not Binned	4..579(-)	Glycosyltransferase	576bp	192aa	0.7			COG0438	Glycosyltransferase	3e-13	[M] Cell wall/membrane/envelope biogenesis	pfam00534	Glycos_transf_1	9.6e-08										GT4
2061998240	sg4i_00244880	contig00416	Not Binned	1125..2318(+)	Glycosyltransferase	1194bp	398aa	0.68			COG0438	Glycosyltransferase	7e-19	[M] Cell wall/membrane/envelope biogenesis	pfam00534	Glycos_transf_1	8.2e-21										GT4
2062001419	sg4i_00276670	contig18362	Not Binned	7713..8186(+)	Glycosyltransferase	474bp	157aa	0.42			COG0438	Glycosyltransferase	6e-14	[M] Cell wall/membrane/envelope biogenesis	pfam00534	Glycos_transf_1	2.8e-18										GT4
2062006091	sg4i_00323390	contig05087	Not Binned	5..667(-)	hypothetical protein	663bp	221aa	0.71	Yes																		GT4
2062008120	sg4i_00343680	contig03213	Not Binned	860..1741(-)	Glycosyltransferase	882bp	293aa	0.75			COG0438	Glycosyltransferase	2e-30	[M] Cell wall/membrane/envelope biogenesis	pfam00534	Glycos_transf_1	3e-36										GT4
2062023631	sg4i_00498790	contig03396	Not Binned	1075..1509(-)	Glycosyltransferase	435bp	144aa	0.73			COG0438	Glycosyltransferase	8e-16	[M] Cell wall/membrane/envelope biogenesis	pfam00534	Glycos_transf_1	1.8e-19										GT4
2062024497	sg4i_00507450	contig03404	Not Binned	897..1685(+)	Glycosyltransferase	789bp	263aa	0.72			COG0438	Glycosyltransferase	2e-08	[M] Cell wall/membrane/envelope biogenesis	pfam00534	Glycos_transf_1	1.8e-08										GT4
2062029421	sg4i_00556690	contig01993	Not Binned	1542..2459(-)	Glycosyltransferase	918bp	305aa	0.7	Yes		COG0438	Glycosyltransferase	3e-23	[M] Cell wall/membrane/envelope biogenesis	pfam00534	Glycos_transf_1	1.2e-26										GT4
2061985720	sg4i_00119680	contig08766	Not Binned	3..518(+)	Glycosyl transferases group 1.	516bp	171aa	0.54							pfam00534	Glycos_transf_1	5.5e-08										GT4	GT0
2062032425	sg4i_00586730	contig01402	Not Binned	646..1569(+)	Glycosyltransferase	924bp	307aa	0.71			COG0438	Glycosyltransferase	1e-21	[M] Cell wall/membrane/envelope biogenesis	pfam00534	Glycos_transf_1	2.9e-16										GT4	GT0
2062000042	sg4i_00262900	contig19353	Not Binned	1..1197(+)	Glycosyltransferase	1197bp	398aa	0.49			COG0438	Glycosyltransferase	8e-13	[M] Cell wall/membrane/envelope biogenesis	pfam00534	Glycos_transf_1	8.9e-16										GT4	GT2,GT4
2061974513	sg4i_00007610	contig18699	Not Binned	4136..5182(-)	Glycosyltransferase	1047bp	348aa	0.63			COG0438	Glycosyltransferase	2e-28	[M] Cell wall/membrane/envelope biogenesis	pfam00534	Glycos_transf_1	5.2e-33										GT4	GT4
2061976958	sg4i_00032060	contig00625	Not Binned	563..967(-)	Glycosyltransferase	405bp	134aa	0.67			COG0438	Glycosyltransferase	2e-11	[M] Cell wall/membrane/envelope biogenesis	pfam00534	Glycos_transf_1	4.7e-08										GT4	GT4
2061977747	sg4i_00039950	contig05515	Not Binned	1..519(+)	Glycosyltransferase	519bp	173aa	0.74			COG0438	Glycosyltransferase	5e-20	[M] Cell wall/membrane/envelope biogenesis	pfam00534	Glycos_transf_1	2.4e-19										GT4	GT4
2061979559	sg4i_00058070	contig20720	Not Binned	23..946(+)	Glycosyltransferase	924bp	307aa	0.7			COG0438	Glycosyltransferase	5e-15	[M] Cell wall/membrane/envelope biogenesis	pfam00534	Glycos_transf_1	1.2e-11										GT4	GT4
2061979837	sg4i_00060850	contig18722	Not Binned	4639..5805(+)	Glycosyltransferase	1167bp	388aa	0.44			COG0438	Glycosyltransferase	2e-27	[M] Cell wall/membrane/envelope biogenesis	pfam00534	Glycos_transf_1	1.3e-29										GT4	GT4
2061980018	sg4i_00062660	contig08348	Not Binned	2..460(+)	Glycosyltransferase	459bp	153aa	0.7			COG0438	Glycosyltransferase	2e-16	[M] Cell wall/membrane/envelope biogenesis	pfam00534	Glycos_transf_1	4.1e-26										GT4	GT4
2061980045	sg4i_00062930	contig08182	Not Binned	106..813(+)	Glycosyltransferase	708bp	235aa	0.77			COG0438	Glycosyltransferase	4e-22	[M] Cell wall/membrane/envelope biogenesis	pfam00534	Glycos_transf_1	2.1e-26										GT4	GT4
2061982513	sg4i_00087610	contig16817	Not Binned	2..676(-)	Glycosyltransferase	675bp	225aa	0.6			COG0438	Glycosyltransferase	5e-18	[M] Cell wall/membrane/envelope biogenesis	pfam00534	Glycos_transf_1	6.2e-21										GT4	GT4
2061983660	sg4i_00099080	contig20746	Not Binned	3..914(+)	Glycosyltransferase	912bp	303aa	0.71			COG0438	Glycosyltransferase	3e-15	[M] Cell wall/membrane/envelope biogenesis	pfam00534	Glycos_transf_1	7.9e-11										GT4	GT4
2061984938	sg4i_00111860	contig05326	Not Binned	3401..4120(-)	Glycosyltransferase	720bp	239aa	0.72			COG0438	Glycosyltransferase	1e-36	[M] Cell wall/membrane/envelope biogenesis	pfam00534	Glycos_transf_1	2.1e-39										GT4	GT4
2061985165	sg4i_00114130	contig05119	Not Binned	6..524(-)	Glycosyltransferase	519bp	173aa	0.66			COG0438	Glycosyltransferase	2e-20	[M] Cell wall/membrane/envelope biogenesis	pfam00534	Glycos_transf_1	2.4e-24										GT4	GT4
2061987748	sg4i_00139960	contig02274	Not Binned	312..1451(-)	Glycosyltransferase	1140bp	379aa	0.71			COG0438	Glycosyltransferase	6e-40	[M] Cell wall/membrane/envelope biogenesis	pfam00534	Glycos_transf_1	4.1e-43										GT4	GT4
2061991558	sg4i_00178060	contig03046	Not Binned	7..951(-)	Glycosyltransferase	945bp	314aa	0.7	Yes		COG0438	Glycosyltransferase	2e-10	[M] Cell wall/membrane/envelope biogenesis	pfam00534	Glycos_transf_1	2.1e-10										GT4	GT4
2061992034	sg4i_00182820	contig20798	Not Binned	820..1557(+)	Glycosyltransferase	738bp	246aa	0.7			COG0438	Glycosyltransferase	5e-10	[M] Cell wall/membrane/envelope biogenesis	pfam00534	Glycos_transf_1	2e-08										GT4	GT4
2061994397	sg4i_00206450	contig03076	Not Binned	1255..2349(-)	Glycosyltransferase	1095bp	364aa	0.74			COG0438	Glycosyltransferase	6e-19	[M] Cell wall/membrane/envelope biogenesis	pfam00534	Glycos_transf_1	2.2e-17										GT4	GT4
2061994960	sg4i_00212080	contig13152	Not Binned	619..1338(-)	Glycosyltransferase	720bp	239aa	0.68			COG0438	Glycosyltransferase	5e-28	[M] Cell wall/membrane/envelope biogenesis	pfam00534	Glycos_transf_1	1.7e-24										GT4	GT4
2061997035	sg4i_00232830	contig03884	Not Binned	1380..2474(+)	Glycosyltransferase	1095bp	365aa	0.75			COG0438	Glycosyltransferase	3e-32	[M] Cell wall/membrane/envelope biogenesis	pfam00534	Glycos_transf_1	5.3e-37										GT4	GT4
2061997595	sg4i_00238430	contig03103	Not Binned	787..1782(+)	Glycosyltransferase	996bp	331aa	0.74			COG0438	Glycosyltransferase	3e-18	[M] Cell wall/membrane/envelope biogenesis	pfam00534	Glycos_transf_1	3.6e-20										GT4	GT4
2061999125	sg4i_00253730	contig04485	Not Binned	561..947(-)	Glycosyltransferase	387bp	128aa	0.71			COG0438	Glycosyltransferase	9e-20	[M] Cell wall/membrane/envelope biogenesis	pfam00534	Glycos_transf_1	1.1e-23										GT4	GT4
2062001423	sg4i_00276710	contig18362	Not Binned	9727..10899(+)	Glycosyltransferase	1173bp	390aa	0.65			COG0438	Glycosyltransferase	4e-33	[M] Cell wall/membrane/envelope biogenesis	pfam00534	Glycos_transf_1	3.9e-29										GT4	GT4
2062001433	sg4i_00276810	contig18862	Not Binned	4725..5873(+)	Glycosyltransferase	1149bp	382aa	0.52			COG0438	Glycosyltransferase	5e-24	[M] Cell wall/membrane/envelope biogenesis	pfam00534	Glycos_transf_1	2.2e-23										GT4	GT4
2062001883	sg4i_00281310	contig17271	Not Binned	1..1098(-)	Glycosyltransferase	1098bp	366aa	0.68			COG0438	Glycosyltransferase	1e-28	[M] Cell wall/membrane/envelope biogenesis	pfam00534	Glycos_transf_1	1.8e-22										GT4	GT4
2062003194	sg4i_00294420	contig13624	Not Binned	15..494(-)	Glycosyltransferase	480bp	159aa	0.68			COG0438	Glycosyltransferase	3e-17	[M] Cell wall/membrane/envelope biogenesis	pfam00534	Glycos_transf_1	4.6e-27										GT4	GT4
2062004255	sg4i_00305030	contig18882	Not Binned	3305..4447(+)	Glycosyltransferase	1143bp	380aa	0.61		Yes	COG0438	Glycosyltransferase	4e-25	[M] Cell wall/membrane/envelope biogenesis	pfam00534	Glycos_transf_1	5.8e-29	KO:K02844	UDP-glucose:(heptosyl)LPS alpha-1,3-glucosyltransferase [EC:2.4.1.-]	5e-24	M00156: Lipopolysaccharide biosynthesis, inner core => outer core => O-antigen				2.4.1.-	Transferases. Glycosyltransferases. Hexosyltransferases.	GT4	GT4
2062004315	sg4i_00305630	contig02441	Not Binned	1179..2279(-)	Glycosyltransferase	1101bp	366aa	0.62			COG0438	Glycosyltransferase	7e-38	[M] Cell wall/membrane/envelope biogenesis	pfam00534	Glycos_transf_1	2.9e-36										GT4	GT4
2062004332	sg4i_00305800	contig13779	Not Binned	405..1562(+)	Glycosyltransferase	1158bp	385aa	0.63			COG0438	Glycosyltransferase	1e-39	[M] Cell wall/membrane/envelope biogenesis	pfam00534	Glycos_transf_1	6.3e-35	KO:K00695; KO:K08256	sucrose synthase [EC:2.4.1.13]; phosphatidylinositol alpha-mannosyltransferase [EC:2.4.1.57]	3.0e-30; 3.0e-30	M00116: Sucrose synthesis, UDP-glucose + fructose => sucrose				2.4.1.13; 2.4.1.57	Sucrose synthase.; Phosphatidylinositol alpha-mannosyltransferase.	GT4	GT4
2062004926	sg4i_00311740	contig20627	Not Binned	600..1610(+)	Glycosyltransferase	1011bp	336aa	0.68			COG0438	Glycosyltransferase	2e-21	[M] Cell wall/membrane/envelope biogenesis	pfam00534	Glycos_transf_1	3.9e-18										GT4	GT4
2062005551	sg4i_00317990	contig13808	Not Binned	2329..4041(+)	Glycosyltransferase	1713bp	570aa	0.61			COG0438	Glycosyltransferase	1e-24	[M] Cell wall/membrane/envelope biogenesis	pfam00534	Glycos_transf_1	9e-25										GT4	GT4
2062005629	sg4i_00318770	contig13112	Not Binned	5..352(+)	Glycosyltransferase	348bp	116aa	0.66			COG0438	Glycosyltransferase	7e-23	[M] Cell wall/membrane/envelope biogenesis	pfam00534	Glycos_transf_1	2e-29										GT4	GT4
2062007515	sg4i_00337630	contig01745	Not Binned	1094..2365(+)	Glycosyltransferase	1272bp	423aa	0.7			COG0438	Glycosyltransferase	3e-26	[M] Cell wall/membrane/envelope biogenesis	pfam00534	Glycos_transf_1	3.1e-20										GT4	GT4
2062010142	sg4i_00363900	contig20426	Not Binned	1..282(+)	Glycosyltransferase	282bp	93aa	0.64			COG0438	Glycosyltransferase	5e-12	[M] Cell wall/membrane/envelope biogenesis	pfam00534	Glycos_transf_1	9.5e-11										GT4	GT4
2062010506	sg4i_00367540	contig07381	Not Binned	1..492(+)	Glycosyltransferase	492bp	164aa	0.75			COG0438	Glycosyltransferase	1e-18	[M] Cell wall/membrane/envelope biogenesis	pfam00534	Glycos_transf_1	1.5e-21										GT4	GT4
2062010642	sg4i_00368900	contig01778	Not Binned	325..1263(-)	Glycosyltransferase	939bp	312aa	0.73			COG0438	Glycosyltransferase	6e-22	[M] Cell wall/membrane/envelope biogenesis	pfam00534	Glycos_transf_1	1.5e-14										GT4	GT4
2062012293	sg4i_00385410	contig06420	Not Binned	1655..2023(-)	Glycosyltransferase	369bp	122aa	0.67			COG0438	Glycosyltransferase	9e-24	[M] Cell wall/membrane/envelope biogenesis	pfam00534	Glycos_transf_1	5.8e-24										GT4	GT4
2062014202	sg4i_00404500	contig18634	Not Binned	6856..8025(-)	Glycosyltransferase	1170bp	389aa	0.66			COG0438	Glycosyltransferase	1e-31	[M] Cell wall/membrane/envelope biogenesis	pfam00534	Glycos_transf_1	4.9e-36										GT4	GT4
2062015220	sg4i_00414680	contig11612	Not Binned	221..1357(-)	Glycosyltransferase	1137bp	378aa	0.65			COG0438	Glycosyltransferase	1e-30	[M] Cell wall/membrane/envelope biogenesis	pfam00534	Glycos_transf_1	2.9e-28										GT4	GT4
2062015785	sg4i_00420330	contig12889	Not Binned	71..1426(-)	Glycosyltransferase	1356bp	451aa	0.71			COG0438	Glycosyltransferase	8e-25	[M] Cell wall/membrane/envelope biogenesis	pfam00534	Glycos_transf_1	2.7e-19										GT4	GT4
2062015959	sg4i_00422070	contig05173	Not Binned	3..547(-)	Glycosyltransferase	545bp	182aa	0.75			COG0438	Glycosyltransferase	4e-26	[M] Cell wall/membrane/envelope biogenesis	pfam00534	Glycos_transf_1	4.6e-32										GT4	GT4
2062017691	sg4i_00439390	contig17597	Not Binned	565..1107(-)	Glycosyltransferase	543bp	180aa	0.68	Yes		COG0438	Glycosyltransferase	1e-22	[M] Cell wall/membrane/envelope biogenesis	pfam00534	Glycos_transf_1	6.3e-21										GT4	GT4
2062018377	sg4i_00446250	contig19489	Not Binned	1430..2662(-)	Glycosyltransferase	1233bp	410aa	0.71			COG0438	Glycosyltransferase	3e-25	[M] Cell wall/membrane/envelope biogenesis	pfam00534	Glycos_transf_1	2.8e-21										GT4	GT4
2062021102	sg4i_00473500	contig15220	Not Binned	3..470(+)	Glycosyltransferase	468bp	156aa	0.64			COG0438	Glycosyltransferase	5e-25	[M] Cell wall/membrane/envelope biogenesis	pfam00534	Glycos_transf_1	2.2e-30										GT4	GT4
2062021320	sg4i_00475680	contig07274	Not Binned	1..480(+)	Glycosyltransferase	480bp	159aa	0.33			COG0438	Glycosyltransferase	1e-21	[M] Cell wall/membrane/envelope biogenesis	pfam00534	Glycos_transf_1	4.7e-40										GT4	GT4
2062021368	sg4i_00476160	contig10285	Not Binned	4387..5682(+)	Glycosyltransferase	1296bp	431aa	0.62			COG0438	Glycosyltransferase	1e-11	[M] Cell wall/membrane/envelope biogenesis	pfam00534	Glycos_transf_1	2.1e-08										GT4	GT4
2062021371	sg4i_00476190	contig10285	Not Binned	7084..8142(+)	Glycosyltransferase	1059bp	353aa	0.65	Yes		COG0438	Glycosyltransferase	3e-24	[M] Cell wall/membrane/envelope biogenesis	pfam00534	Glycos_transf_1	1.6e-24										GT4	GT4
2062022077	sg4i_00483250	contig08734	Not Binned	4..489(-)	Glycosyltransferase	486bp	162aa	0.47			COG0438	Glycosyltransferase	1e-18	[M] Cell wall/membrane/envelope biogenesis	pfam00534	Glycos_transf_1	2.6e-27										GT4	GT4
2062022393	sg4i_00486410	contig01234	Not Binned	1292..1726(-)	Glycosyltransferase	435bp	144aa	0.65			COG0438	Glycosyltransferase	2e-21	[M] Cell wall/membrane/envelope biogenesis	pfam00534	Glycos_transf_1	7.6e-21										GT4	GT4
2062024629	sg4i_00508770	contig18539	Not Binned	260..1414(-)	Glycosyltransferase	1155bp	384aa	0.59			COG0438	Glycosyltransferase	6e-39	[M] Cell wall/membrane/envelope biogenesis	pfam00534	Glycos_transf_1	1.7e-37										GT4	GT4
2062024787	sg4i_00510350	contig17884	Not Binned	2..325(+)	Glycosyltransferase	324bp	108aa	0.7			COG0438	Glycosyltransferase	4e-06	[M] Cell wall/membrane/envelope biogenesis	pfam00534	Glycos_transf_1	8.5e-10										GT4	GT4
2062025760	sg4i_00520080	contig20549	Not Binned	626..1636(+)	Glycosyltransferase	1011bp	336aa	0.68			COG0438	Glycosyltransferase	3e-21	[M] Cell wall/membrane/envelope biogenesis	pfam00534	Glycos_transf_1	1e-17										GT4	GT4
2062025778	sg4i_00520260	contig01790	Not Binned	2..378(+)	mannose-6-phosphate isomerase, type 2 (EC 5.3.1.8)	377bp	125aa	0.66	Yes		COG0438	Glycosyltransferase	2e-15	[M] Cell wall/membrane/envelope biogenesis	pfam00534	Glycos_transf_1	5.2e-14										GT4	GT4
2062025817	sg4i_00520650	contig11879	Not Binned	684..1223(-)	Glycosyltransferase	540bp	179aa	0.66	Yes		COG0438	Glycosyltransferase	1e-22	[M] Cell wall/membrane/envelope biogenesis	pfam00534	Glycos_transf_1	1.4e-21										GT4	GT4
2062026050	sg4i_00522980	contig19052	Not Binned	2327..3508(+)	Glycosyltransferase	1182bp	393aa	0.68			COG0438	Glycosyltransferase	2e-31	[M] Cell wall/membrane/envelope biogenesis	pfam00534	Glycos_transf_1	5.6e-23										GT4	GT4
2062029419	sg4i_00556670	contig01993	Not Binned	3..767(-)	hypothetical protein	765bp	255aa	0.64																			GT4	GT4
2062032656	sg4i_00589040	contig02758	Not Binned	1198..2484(+)	Glycosyltransferase	1287bp	428aa	0.71			COG0438	Glycosyltransferase	1e-28	[M] Cell wall/membrane/envelope biogenesis	pfam00534; pfam00534	Glycos_transf_1; Glycos_transf_1	1.3e-25; 2.2e-08										GT4	GT4
2062033591	sg4i_00598390	contig02111	Not Binned	1552..2958(+)	Glycosyltransferase	1407bp	468aa	0.64			COG0438	Glycosyltransferase	2e-41	[M] Cell wall/membrane/envelope biogenesis	pfam00534	Glycos_transf_1	5.6e-34										GT4	GT4
2062036233	sg4i_00624810	contig19684	Not Binned	1239..1898(-)	Glycosyltransferase	660bp	219aa	0.67			COG0438	Glycosyltransferase	1e-29	[M] Cell wall/membrane/envelope biogenesis	pfam00534	Glycos_transf_1	2.1e-37										GT4	GT4
2061976157	sg4i_00024050	contig10920	Not Binned	132..1364(+)	trehalose synthase (ADP-glucose) (EC 2.4.1.-)	1233bp	410aa	0.69			COG0438	Glycosyltransferase	1e-27	[M] Cell wall/membrane/envelope biogenesis	pfam00534	Glycos_transf_1	1e-25										GT4	GT4	2.4.1.-
2061978777	sg4i_00050250	contig19216	Not Binned	601..1725(-)	Glycosyltransferase	1125bp	374aa	0.51	Yes		COG0438	Glycosyltransferase	1e-42	[M] Cell wall/membrane/envelope biogenesis	pfam00534	Glycos_transf_1	4.9e-39										GT4	GT4	2.4.1.-
2061982898	sg4i_00091460	contig05273	Not Binned	150..1283(+)	Glycosyltransferase	1134bp	377aa	0.72			COG0438	Glycosyltransferase	3e-34	[M] Cell wall/membrane/envelope biogenesis	pfam00534	Glycos_transf_1	1.1e-34										GT4	GT4	2.4.1.-
2061983623	sg4i_00098710	contig18245	Not Binned	7695..8726(+)	Glycosyltransferase	1032bp	343aa	0.65			COG0438	Glycosyltransferase	3e-24	[M] Cell wall/membrane/envelope biogenesis	pfam00534	Glycos_transf_1	4.9e-21										GT4	GT4	2.4.1.-
2061983727	sg4i_00099750	contig10997	Not Binned	1955..3157(-)	Glycosyltransferase	1203bp	400aa	0.72			COG0438	Glycosyltransferase	5e-40	[M] Cell wall/membrane/envelope biogenesis	pfam00534	Glycos_transf_1	1.8e-40										GT4	GT4	2.4.1.-
2061988693	sg4i_00149410	contig03019	Not Binned	1449..2699(-)	Glycosyltransferase	1251bp	416aa	0.69			COG0438	Glycosyltransferase	2e-20	[M] Cell wall/membrane/envelope biogenesis	pfam00534	Glycos_transf_1	1.9e-19										GT4	GT4	2.4.1.-
2061991679	sg4i_00179270	contig03047	Not Binned	54..1403(+)	Glycosyltransferase	1350bp	449aa	0.74	Yes		COG0438	Glycosyltransferase	2e-42	[M] Cell wall/membrane/envelope biogenesis	pfam00534	Glycos_transf_1	1.7e-39										GT4	GT4	2.4.1.-
2062002797	sg4i_00290450	contig01051	Not Binned	2..541(+)	Glycosyltransferase	540bp	179aa	0.5	Yes		COG0438	Glycosyltransferase	7e-26	[M] Cell wall/membrane/envelope biogenesis	pfam00534	Glycos_transf_1	5.4e-31										GT4	GT4	2.4.1.-
2062002798	sg4i_00290460	contig01051	Not Binned	927..1760(+)	Glycosyltransferase	834bp	277aa	0.45			COG0438	Glycosyltransferase	8e-35	[M] Cell wall/membrane/envelope biogenesis	pfam00534	Glycos_transf_1	5.1e-44										GT4	GT4	2.4.1.-
2062029457	sg4i_00557050	contig18579	Not Binned	2563..3717(-)	Glycosyltransferase	1155bp	384aa	0.38			COG0438	Glycosyltransferase	5e-41	[M] Cell wall/membrane/envelope biogenesis	pfam00534	Glycos_transf_1	1.4e-41										GT4	GT4	2.4.1.-
2062029458	sg4i_00557060	contig18579	Not Binned	4084..5205(+)	Glycosyltransferase	1122bp	373aa	0.55			COG0438	Glycosyltransferase	3e-38	[M] Cell wall/membrane/envelope biogenesis	pfam00534	Glycos_transf_1	5e-37										GT4	GT4	2.4.1.-
2061998034	sg4i_00242820	contig05740	Not Binned	3..1301(-)	Glycosyltransferase	1299bp	433aa	0.74			COG0438	Glycosyltransferase	2e-37	[M] Cell wall/membrane/envelope biogenesis	pfam00534	Glycos_transf_1	2.3e-32	KO:K08256	phosphatidylinositol alpha-mannosyltransferase [EC:2.4.1.57]	1e-76					2.4.1.57	Phosphatidylinositol alpha-mannosyltransferase.	GT4	GT4	2.4.1.57
2062009138	sg4i_00353860	contig00499	Not Binned	3394..4371(-)	Glycosyltransferase	978bp	325aa	0.63			COG0438	Glycosyltransferase	1e-31	[M] Cell wall/membrane/envelope biogenesis	pfam00534	Glycos_transf_1	1.6e-39	KO:K06338	spore coat protein SA	8e-66							GT4	GT4	2.4.2.-
2061977856	sg4i_00041040	contig13322	Not Binned	796..2001(+)	Glycosyltransferase	1206bp	401aa	0.71			COG0438	Glycosyltransferase	6e-45	[M] Cell wall/membrane/envelope biogenesis	pfam00534; pfam08323	Glycos_transf_1; Glyco_transf_5	9.0e-40; 8.5e-15										GT5	GT4	2.4.1.-
2061983633	sg4i_00098810	contig18245	Not Binned	18289..19752(+)	glycogen synthase (ADP-glucose)	1464bp	487aa	0.6	Yes		COG0297	Glycogen synthase		[G] Carbohydrate transport and metabolism	pfam00534; pfam08323	Glycos_transf_1; Glyco_transf_5	2.1e-12; 7.0e-85	KO:K00703	starch synthase [EC:2.4.1.21]			TIGR02095	glycogen/starch synthases, ADP-glucose type		2.4.1.21	Starch synthase.	GT5	GT5	2.4.1.21
2062009605	sg4i_00358530	contig20422	Not Binned	429..1091(+)	Glycogen synthase	663bp	220aa	0.69			COG0297	Glycogen synthase	5e-31	[G] Carbohydrate transport and metabolism	pfam08323	Glyco_transf_5	1.3e-37										GT5	GT5	2.4.1.21
2062009606	sg4i_00358540	contig20422	Not Binned	1003..1749(+)	Glycogen synthase	747bp	248aa	0.68			COG0297	Glycogen synthase	4e-69	[G] Carbohydrate transport and metabolism	pfam00534	Glycos_transf_1	7.3e-22					TIGR02095	glycogen/starch synthases, ADP-glucose type	2e-51			GT5	GT5	2.4.1.21
2062014954	sg4i_00412020	contig07201	Not Binned	67..519(-)	glycogen synthase (ADP-glucose)	453bp	150aa	0.62			COG0297	Glycogen synthase	5e-46	[G] Carbohydrate transport and metabolism	pfam00534	Glycos_transf_1	1.3e-07										GT5	GT5	2.4.1.21
2062021432	sg4i_00476800	contig02754	Not Binned	3..601(-)	glycogen synthase (ADP-glucose)	599bp	199aa	0.71			COG0297	Glycogen synthase	1e-59	[G] Carbohydrate transport and metabolism	pfam00534; pfam08323	Glycos_transf_1; Glyco_transf_5	8.4e-10; 3.2e-14					TIGR02095	glycogen/starch synthases, ADP-glucose type	2.6e-19			GT5	GT5	2.4.1.21
2061987399	sg4i_00136470	contig13438	Not Binned	770..1279(+)	Membrane carboxypeptidase/penicillin-binding protein	510bp	169aa	0.68		Yes	COG5009	Membrane carboxypeptidase/penicillin-binding protein	1e-31	[M] Cell wall/membrane/envelope biogenesis	pfam00912	Transgly	4.4e-24										GT51
2061992036	sg4i_00182840	contig03666	Not Binned	459..956(+)	Membrane carboxypeptidase (penicillin-binding protein)	498bp	166aa	0.7	Yes	Yes	COG0744	Membrane carboxypeptidase (penicillin-binding protein)	7e-22	[M] Cell wall/membrane/envelope biogenesis	pfam00912	Transgly	8.4e-23										GT51
2062033270	sg4i_00595180	contig07517	Not Binned	121..504(+)	Membrane carboxypeptidase (penicillin-binding protein)	384bp	128aa	0.58	Yes	Yes	COG0744	Membrane carboxypeptidase (penicillin-binding protein)	3e-21	[M] Cell wall/membrane/envelope biogenesis	pfam00912	Transgly	1.5e-16										GT51
2061988070	sg4i_00143180	contig18272	Not Binned	10404..13028(-)	Membrane carboxypeptidase (penicillin-binding protein)	2625bp	874aa	0.61			COG0744	Membrane carboxypeptidase (penicillin-binding protein)	7e-129	[M] Cell wall/membrane/envelope biogenesis	pfam00905; pfam00912	Transpeptidase; Transgly	3.4e-38; 1.3e-56	KO:K03693	penicillin-binding protein								GT51	GT51
2061993179	sg4i_00194270	contig02330	Not Binned	1..1005(+)	Membrane carboxypeptidase/penicillin-binding protein	1005bp	335aa	0.7	Yes	Yes	COG5009	Membrane carboxypeptidase/penicillin-binding protein	6e-70	[M] Cell wall/membrane/envelope biogenesis	pfam00912	Transgly	1.8e-60										GT51	GT51
2061996630	sg4i_00228780	contig04819	Not Binned	3..556(-)	Membrane carboxypeptidase (penicillin-binding protein)	554bp	184aa	0.66			COG0744	Membrane carboxypeptidase (penicillin-binding protein)	5e-28	[M] Cell wall/membrane/envelope biogenesis	pfam00912	Transgly	7.1e-19										GT51	GT51
2061999668	sg4i_00259160	contig03919	Not Binned	6108..8072(+)	penicillin-binding protein, 1A family	1965bp	655aa	0.66	Yes	Yes	COG0744	Membrane carboxypeptidase (penicillin-binding protein)		[M] Cell wall/membrane/envelope biogenesis	pfam00905; pfam00912	Transpeptidase; Transgly	1.4e-35; 1.6e-70	KO:K05366	penicillin-binding protein 1A [EC:2.4.1.- 3.4.-.-]			TIGR02071; TIGR02074	penicillin-binding protein 1B; penicillin-binding protein, 1A family	1.9e-47; 0.0e+00	2.4.1.-; 3.4.-	Transferases. Glycosyltransferases. Hexosyltransferases.; Hydrolases. Acting on peptide bonds (peptide hydrolases).	GT51	GT51
2062014624	sg4i_00408720	contig00551	Not Binned	897..3236(-)	penicillin-binding protein, 1A family	2340bp	779aa	0.6	Yes		COG0744	Membrane carboxypeptidase (penicillin-binding protein)		[M] Cell wall/membrane/envelope biogenesis	pfam00905; pfam00912	Transpeptidase; Transgly	1.4e-39; 3.0e-63	KO:K05366	penicillin-binding protein 1A [EC:2.4.1.- 3.4.-.-]			TIGR02074	penicillin-binding protein, 1A family		2.4.1.-; 3.4.-	Transferases. Glycosyltransferases. Hexosyltransferases.; Hydrolases. Acting on peptide bonds (peptide hydrolases).	GT51	GT51
2062026221	sg4i_00524690	contig00662	Not Binned	22412..24478(-)	penicillin-binding protein, 1A family	2067bp	688aa	0.65	Yes	Yes	COG0744	Membrane carboxypeptidase (penicillin-binding protein)		[M] Cell wall/membrane/envelope biogenesis	pfam00905; pfam00912	Transpeptidase; Transgly	8.9e-38; 4.9e-71	KO:K05366	penicillin-binding protein 1A [EC:2.4.1.- 3.4.-.-]			TIGR02071; TIGR02074	penicillin-binding protein 1B; penicillin-binding protein, 1A family	5.1e-63; 0.0e+00	2.4.1.-; 3.4.-	Transferases. Glycosyltransferases. Hexosyltransferases.; Hydrolases. Acting on peptide bonds (peptide hydrolases).	GT51	GT51
2062031746	sg4i_00579940	contig02092	Not Binned	1..555(+)	Membrane carboxypeptidase/penicillin-binding protein	555bp	184aa	0.63	Yes	Yes	COG5009	Membrane carboxypeptidase/penicillin-binding protein	4e-34	[M] Cell wall/membrane/envelope biogenesis	pfam00912	Transgly	1.7e-32										GT51	GT51
2062032166	sg4i_00584140	contig06783	Not Binned	2..514(+)	Membrane carboxypeptidase (penicillin-binding protein)	513bp	171aa	0.61			COG0744	Membrane carboxypeptidase (penicillin-binding protein)	9e-42	[M] Cell wall/membrane/envelope biogenesis	pfam00912	Transgly	4e-48										GT51	GT51
2061992464	sg4i_00187120	contig03828	Not Binned	533..1174(+)	Membrane carboxypeptidase (penicillin-binding protein)	642bp	214aa	0.68	Yes	Yes	COG0744	Membrane carboxypeptidase (penicillin-binding protein)	4e-44	[M] Cell wall/membrane/envelope biogenesis	pfam00912; pfam00912	Transgly; Transgly	5.3e-34; 4.9e-10	KO:K03814	monofunctional biosynthetic peptidoglycan transglycosylase [EC:2.4.1.-]	2e-38					2.4.1.-	Transferases. Glycosyltransferases. Hexosyltransferases.	GT51	GT51	2.4.-.-
2061982526	sg4i_00087740	contig06325	Not Binned	2..559(-)	Membrane carboxypeptidase/penicillin-binding protein	558bp	186aa	0.66			COG5009	Membrane carboxypeptidase/penicillin-binding protein	5e-47	[M] Cell wall/membrane/envelope biogenesis	pfam00912	Transgly	4.4e-29										GT51	GT51	2.4.1.129
2062008219	sg4i_00344670	contig01753	Not Binned	3..1052(-)	Membrane carboxypeptidase/penicillin-binding protein	1050bp	350aa	0.61	Yes		COG5009	Membrane carboxypeptidase/penicillin-binding protein	6e-120	[M] Cell wall/membrane/envelope biogenesis	pfam00912	Transgly	1.2e-65										GT51	GT51	2.4.1.129
2062009348	sg4i_00355960	contig01764	Not Binned	1076..2068(+)	Membrane carboxypeptidase/penicillin-binding protein	993bp	331aa	0.66	Yes	Yes	COG5009	Membrane carboxypeptidase/penicillin-binding protein	2e-71	[M] Cell wall/membrane/envelope biogenesis	pfam00912	Transgly	3.4e-58										GT51	GT51	2.4.1.129
2062013898	sg4i_00401460	contig21010	Not Binned	1..573(-)	Membrane carboxypeptidase/penicillin-binding protein	573bp	191aa	0.65			COG5009	Membrane carboxypeptidase/penicillin-binding protein	5e-48	[M] Cell wall/membrane/envelope biogenesis	pfam00912	Transgly	2.2e-28										GT51	GT51	2.4.1.129
2062029580	sg4i_00558280	contig13741	Not Binned	2..750(-)	Membrane carboxypeptidase (penicillin-binding protein)	749bp	249aa	0.59			COG0744	Membrane carboxypeptidase (penicillin-binding protein)	4e-68	[M] Cell wall/membrane/envelope biogenesis	pfam00912	Transgly	5.5e-61										GT51	GT51	2.4.1.129
2062032065	sg4i_00583130	contig13832	Not Binned	3..497(+)	Membrane carboxypeptidase (penicillin-binding protein)	495bp	165aa	0.65			COG0744	Membrane carboxypeptidase (penicillin-binding protein)	3e-45	[M] Cell wall/membrane/envelope biogenesis	pfam00912	Transgly	2e-52										GT51	GT51	2.4.1.129
2062032090	sg4i_00583380	contig02096	Not Binned	1255..2655(+)	Membrane carboxypeptidase (penicillin-binding protein)	1401bp	467aa	0.62	Yes		COG0744	Membrane carboxypeptidase (penicillin-binding protein)	4e-80	[M] Cell wall/membrane/envelope biogenesis	pfam00905; pfam00912	Transpeptidase; Transgly	9.7e-08; 8.0e-57										GT51	GT51	2.4.1.129
2062035852	sg4i_00621000	contig08632	Not Binned	3..472(-)	Membrane carboxypeptidase (penicillin-binding protein)	470bp	156aa	0.67	Yes	Yes	COG0744	Membrane carboxypeptidase (penicillin-binding protein)	6e-39	[M] Cell wall/membrane/envelope biogenesis	pfam00912	Transgly	4.9e-43										GT51	GT51	2.4.1.129
2062022570	sg4i_00488180	contig20023	Not Binned	682..1857(-)	mannosyl-3-phosphoglycerate synthase (EC 2.4.1.217)	1176bp	391aa	0.68							pfam09488	Osmo_MPGsynth		KO:K05947	mannosyl-3-phosphoglycerate synthase [EC:2.4.1.217]			TIGR02460	mannosyl-3-phosphoglycerate synthase		2.4.1.217	Mannosyl-3-phosphoglycerate synthase.	GT55	GT55	2.4.1.217
2062036709	sg4i_00629570	contig02143	Not Binned	127..633(-)	hypothetical protein	507bp	168aa	0.49																			GT70
2061974078	sg4i_00003260	contig06848	Not Binned	89..637(-)	Lipopolysaccharide biosynthesis proteins, LPS:glycosyltransferases	549bp	183aa	0.55			COG1442	Lipopolysaccharide biosynthesis proteins, LPS:glycosyltransferases	2e-20	[M] Cell wall/membrane/envelope biogenesis	pfam01501	Glyco_transf_8	7.2e-30										GT8	GT8
2062001583	sg4i_00278310	contig14829	Not Binned	4..405(-)	Lipopolysaccharide biosynthesis proteins, LPS:glycosyltransferases	402bp	134aa	0.56			COG1442	Lipopolysaccharide biosynthesis proteins, LPS:glycosyltransferases	2e-13	[M] Cell wall/membrane/envelope biogenesis	pfam01501	Glyco_transf_8	2.8e-22										GT8	GT8
2062026565	sg4i_00528130	contig01957	Not Binned	13681..14520(+)	Lipopolysaccharide biosynthesis proteins, LPS:glycosyltransferases	840bp	279aa	0.54			COG1442	Lipopolysaccharide biosynthesis proteins, LPS:glycosyltransferases	2e-31	[M] Cell wall/membrane/envelope biogenesis	pfam01501	Glyco_transf_8	7.6e-36										GT8	GT8
2062037485	sg4i_00637330	contig01451	Not Binned	685..1524(+)	Lipopolysaccharide biosynthesis proteins, LPS:glycosyltransferases	840bp	279aa	0.58			COG1442	Lipopolysaccharide biosynthesis proteins, LPS:glycosyltransferases	2e-34	[M] Cell wall/membrane/envelope biogenesis	pfam01501	Glyco_transf_8	1.8e-37										GT8	GT8
2061996327	sg4i_00225750	contig02785	Not Binned	1325..2305(+)	Glycosyltransferases involved in cell wall biogenesis	981bp	327aa	0.68			COG0463	Glycosyltransferases involved in cell wall biogenesis	3e-12	[M] Cell wall/membrane/envelope biogenesis	pfam00535	Glycos_transf_2	5.6e-20										GT81	GT2
2062009411	sg4i_00356590	contig20420	Not Binned	523..1152(-)	Glycosyltransferases involved in cell wall biogenesis	630bp	209aa	0.71			COG0463	Glycosyltransferases involved in cell wall biogenesis	1e-12	[M] Cell wall/membrane/envelope biogenesis	pfam00535	Glycos_transf_2	6.6e-22										GT81	GT2
2061974332	sg4i_00005800	contig00833	Not Binned	2..1078(-)	hypothetical protein	1077bp	359aa	0.67																			GT83
2061974358	sg4i_00006060	contig08010	Not Binned	3564..4241(+)	ATP synthase, F0 subunit b	678bp	225aa	0.73	Yes	Yes	COG0711	F0F1-type ATP synthase, subunit b	1e-18	[C] Energy production and conversion	pfam00430	ATP-synt_B	1.7e-27	KO:K02109	F-type H+-transporting ATPase subunit b [EC:3.6.3.14]	6e-48	M00286: F-type ATPase (Bacteria); M00293: ATP synthase	TIGR01144	ATP synthase, F0 subunit b	3.9e-24	3.6.3.14	H(+)-transporting two-sector ATPase.	GT83
2061986031	sg4i_00122790	contig00321	Not Binned	1..1263(+)	hypothetical protein	1263bp	421aa	0.7	Yes																		GT83
2062024558	sg4i_00508060	contig00858	Not Binned	2..739(-)	hypothetical protein	738bp	246aa	0.75	Yes	Yes																	GT83
2062024582	sg4i_00508300	contig00644	Not Binned	805..1701(+)	Predicted membrane protein	897bp	299aa	0.71	Yes	Yes	COG5305	Predicted membrane protein	2e-22	[S] Function unknown	pfam02516	STT3	3.7e-08										GT83
2062025022	sg4i_00512700	contig11864	Not Binned	4732..6483(-)	hypothetical protein	1752bp	583aa	0.69		Yes	COG1807	4-amino-4-deoxy-L-arabinose transferase and related glycosyltransferases of PMT family	4e-08	[M] Cell wall/membrane/envelope biogenesis													GT83
2062026851	sg4i_00530990	contig04857	Not Binned	927..1760(-)	hypothetical protein	834bp	277aa	0.74	Yes	Yes																	GT83
2062036835	sg4i_00630830	contig19689	Not Binned	3..788(-)	hypothetical protein	786bp	262aa	0.68	Yes	Yes																	GT83
2062034686	sg4i_00609340	contig07959	Not Binned	1..528(+)	hypothetical protein	528bp	176aa	0.74	Yes	Yes																	GT87
2061993296	sg4i_00195440	contig12621	Not Binned	1515..1925(+)	ADP-heptose:LPS heptosyltransferase	411bp	136aa	0.72			COG0859	ADP-heptose:LPS heptosyltransferase	9e-15	[M] Cell wall/membrane/envelope biogenesis	pfam01075	Glyco_transf_9	5.3e-17										GT9
2061991559	sg4i_00178070	contig03046	Not Binned	939..2006(-)	ADP-heptose:LPS heptosyltransferase	1068bp	355aa	0.75	Yes		COG0859	ADP-heptose:LPS heptosyltransferase	6e-49	[M] Cell wall/membrane/envelope biogenesis	pfam01075	Glyco_transf_9	3.3e-45					TIGR02195	lipopolysaccharide heptosyltransferase II	5.4e-15			GT9	GT9
2061991560	sg4i_00178080	contig03046	Not Binned	2003..3088(-)	ADP-heptose:LPS heptosyltransferase	1086bp	361aa	0.75			COG0859	ADP-heptose:LPS heptosyltransferase	8e-36	[M] Cell wall/membrane/envelope biogenesis	pfam01075	Glyco_transf_9	2.7e-20										GT9	GT9
2061991561	sg4i_00178090	contig03046	Not Binned	3085..4230(-)	ADP-heptose:LPS heptosyltransferase	1146bp	381aa	0.73			COG0859	ADP-heptose:LPS heptosyltransferase	2e-42	[M] Cell wall/membrane/envelope biogenesis	pfam01075	Glyco_transf_9	4.5e-33					TIGR02195	lipopolysaccharide heptosyltransferase II	2.6e-15			GT9	GT9
2061993295	sg4i_00195430	contig12621	Not Binned	826..1482(+)	ADP-heptose:LPS heptosyltransferase	657bp	218aa	0.68	Yes		COG0859	ADP-heptose:LPS heptosyltransferase	3e-29	[M] Cell wall/membrane/envelope biogenesis	pfam01075	Glyco_transf_9	1.9e-11										GT9	GT9
2062007142	sg4i_00333900	contig02277	Not Binned	1..522(+)	ADP-heptose:LPS heptosyltransferase	522bp	174aa	0.71			COG0859	ADP-heptose:LPS heptosyltransferase	1e-25	[M] Cell wall/membrane/envelope biogenesis	pfam01075	Glyco_transf_9	1.4e-32										GT9	GT9
2062019653	sg4i_00459010	contig09511	Not Binned	2..531(-)	hypothetical protein	530bp	177aa	0.75																			GT9	GT9
2062027676	sg4i_00539240	contig03443	Not Binned	1276..2058(-)	ADP-heptose:LPS heptosyltransferase	783bp	260aa	0.7			COG0859	ADP-heptose:LPS heptosyltransferase	6e-33	[M] Cell wall/membrane/envelope biogenesis	pfam01075	Glyco_transf_9	6.1e-45										GT9	GT9
2062004948	sg4i_00311960	contig05818	Not Binned	194..517(+)	Domain of unknown function.	324bp	108aa	0.71							pfam01697	DUF23	2.5e-05										GT92	GT2
2062000793	sg4i_00270410	contig00743	Not Binned	650..1852(+)	Glycosyltransferase	1203bp	400aa	0.63			COG0438	Glycosyltransferase	6e-19	[M] Cell wall/membrane/envelope biogenesis	pfam00534	Glycos_transf_1	2e-14										GT94	GT4
2062013296	sg4i_00395440	contig15939	Not Binned	2..1000(+)	Glycosyltransferase	999bp	332aa	0.7			COG0438	Glycosyltransferase	3e-22	[M] Cell wall/membrane/envelope biogenesis	pfam00534	Glycos_transf_1	1.6e-11										GT94	GT4
2062014367	sg4i_00406150	contig02552	Not Binned	27..532(-)	Glycosyltransferase	506bp	169aa	0.64			COG0438	Glycosyltransferase	2e-09	[M] Cell wall/membrane/envelope biogenesis	pfam00534	Glycos_transf_1	2.6e-07										GT94	GT4
2062021302	sg4i_00475500	contig03321	Not Binned	21..863(+)	Glycosyl transferases group 1.	843bp	281aa	0.73							pfam00534	Glycos_transf_1	3.6e-05										GT94	GT4
2062027457	sg4i_00537050	contig11919	Not Binned	1..990(+)	Glycosyltransferase	990bp	329aa	0.7			COG0438	Glycosyltransferase	4e-27	[M] Cell wall/membrane/envelope biogenesis	pfam00534	Glycos_transf_1	7e-22										GT94	GT4
2062028115	sg4i_00543630	contig01977	Not Binned	3..1175(+)	Glycosyltransferase	1173bp	390aa	0.66			COG0438	Glycosyltransferase	4e-22	[M] Cell wall/membrane/envelope biogenesis	pfam00534	Glycos_transf_1	1.2e-17										GT94	GT4
2062037964	sg4i_00642120	contig19195	Not Binned	1073..2269(+)	Glycosyltransferase	1197bp	398aa	0.63			COG0438	Glycosyltransferase	3e-19	[M] Cell wall/membrane/envelope biogenesis	pfam00534	Glycos_transf_1	2.3e-17										GT94	GT4
2062028905	sg4i_00551530	contig11953	Not Binned	2..817(+)	hypothetical protein	816bp	271aa	0.7														TIGR01376	Chlamydial polymorphic outer membrane protein repeat	8.9e-05			PL1
2062028907	sg4i_00551550	contig11953	Not Binned	1280..2596(+)	hypothetical protein	1317bp	439aa	0.67	Yes																		PL1
2062005746	sg4i_00319940	contig06072	Not Binned	3..1052(-)	pectate lyase, PelA/Pel-15E family	1050bp	350aa	0.72							pfam09492	Pec_lyase	1.2e-94	KO:K01728	pectate lyase [EC:4.2.2.2]	1e-78		TIGR02474	pectate lyase, PelA/Pel-15E family	1.4e-108	4.2.2.2	Pectate lyase.	PL10	PL10	4.2.2.2
2062020116	sg4i_00463640	contig04291	Not Binned	17490..22328(+)	Bacterial surface proteins containing Ig-like domains	4839bp	1612aa	0.59			COG5492	Bacterial surface proteins containing Ig-like domains	1e-21	[N] Cell motility	pfam00963; pfam02368; pfam02368; pfam02368; pfam02368	Cohesin; Big_2; Big_2; Big_2; Big_2	3.6e-07; 1.1e-22; 1.5e-17; 4.8e-13; 1.7e-09										PL11	PL11	4.2.2.-
2062022655	sg4i_00489030	contig19024	Not Binned	1..2028(-)	FG-GAP repeat.	2028bp	676aa	0.65	Yes						pfam01839	FG-GAP	2.4e-05										PL11	PL11	4.2.2.-
2061990868	sg4i_00171160	contig00355	Not Binned	2860..4296(-)	Heparinase II/III-like protein.	1437bp	478aa	0.6							pfam07940	Hepar_II_III	3e-09										PL12
2062014603	sg4i_00408510	contig08855	Not Binned	3..608(+)	Heparinase II/III-like protein.	606bp	202aa	0.68							pfam07940	Hepar_II_III	8.3e-12										PL12
2062031036	sg4i_00572840	contig12001	Not Binned	1445..4150(+)	Heparinase II/III-like protein.	2706bp	901aa	0.65	Yes						pfam07940	Hepar_II_III	1.1e-11										PL12
2062031278	sg4i_00575260	contig12008	Not Binned	763..1986(-)	Heparinase II/III-like protein.	1224bp	407aa	0.76							pfam07940	Hepar_II_III	6.4e-21										PL12
2061977415	sg4i_00036630	contig02178	Not Binned	1164..2426(+)	Heparinase II/III-like protein.	1263bp	421aa	0.65							pfam07940	Hepar_II_III	1.9e-24										PL17	PL17	4.2.2.3
2062001056	sg4i_00273040	contig18359	Not Binned	3855..5261(-)	hypothetical protein	1407bp	468aa	0.51	Yes	Yes																	PL22
2062035291	sg4i_00615390	contig01333	Not Binned	2..964(+)	Periplasmic component of the Tol biopolymer transport system	963bp	320aa	0.67			COG0823	Periplasmic component of the Tol biopolymer transport system	2e-29	[U] Intracellular trafficking, secretion, and vesicular transport	pfam07676; pfam07676; pfam07676; pfam07676; pfam07676	PD40; PD40; PD40; PD40; PD40	7.4e-13; 8.9e-11; 1.5e-10; 4.4e-05; 2.2e-04										PL22
2061991221	sg4i_00174690	contig00950	Not Binned	2114..3094(+)	hypothetical protein	981bp	327aa	0.65	Yes																		PL6	PL6	4.2.2.3
2062008660	sg4i_00349080	contig01104	Not Binned	52..969(-)	hypothetical protein	918bp	305aa	0.67																			PL9
2062025809	sg4i_00520570	contig04450	Not Binned	85..1695(-)	hypothetical protein	1611bp	536aa	0.73	Yes																		PL9
2062030802	sg4i_00570500	contig13103	Not Binned	2..1084(+)	hypothetical protein	1083bp	361aa	0.59																			PL9
2061976551	sg4i_00027990	contig00724	Not Binned	996..1913(+)	S-layer homology domain.	918bp	306aa	0.54	Yes						pfam00395; pfam00395; pfam00395	SLH; SLH; SLH	6.0e-16; 1.7e-08; 1.2e-05										SLH
2061977085	sg4i_00033330	contig02930	Not Binned	50..2074(-)	S-layer homology domain.	2025bp	674aa	0.7	Yes						pfam00395	SLH	1.7e-12										SLH
2061980905	sg4i_00071530	contig10712	Not Binned	4..486(+)	S-layer homology domain.	483bp	161aa	0.58							pfam00395	SLH	1.3e-14										SLH
2061983579	sg4i_00098270	contig00299	Not Binned	2..2905(+)	Domain of Unknown Function (DUF1080)./Bacterial Ig-like domain (group 2)./Fibronectin type III domain./S-layer homology domain.	2904bp	968aa	0.66							pfam00041; pfam00395; pfam00395; pfam02368; pfam02368; pfam06439; pfam06439	fn3; SLH; SLH; Big_2; Big_2; DUF1080; DUF1080	1.5e-08; 3.1e-09; 5.4e-08; 1.2e-08; 1.1e-07; 4.2e-07; 1.3e-06										SLH
2061984818	sg4i_00110660	contig08379	Not Binned	1077..2315(-)	S-layer homology domain.	1239bp	412aa	0.67	Yes						pfam00395	SLH	3.3e-13										SLH
2061986802	sg4i_00130500	contig11037	Not Binned	58..486(+)	S-layer homology domain.	429bp	142aa	0.66	Yes						pfam00395; pfam00395	SLH; SLH	7.3e-13; 7.7e-13										SLH
2061987580	sg4i_00138280	contig18269	Not Binned	19000..21204(-)	S-layer homology domain.	2205bp	734aa	0.57	Yes	Yes					pfam00395; pfam00395	SLH; SLH	2.0e-07; 5.8e-06										SLH
2061989528	sg4i_00157760	contig10585	Not Binned	229..459(-)	S-layer homology domain.	231bp	76aa	0.68	Yes						pfam00395	SLH	1.4e-05										SLH
2061991049	sg4i_00172970	contig06085	Not Binned	1..891(+)	S-layer homology domain.	891bp	297aa	0.65							pfam00395	SLH	1.1e-13										SLH
2061992346	sg4i_00185940	contig13519	Not Binned	861..1202(-)	S-layer homology domain.	342bp	113aa	0.65							pfam00395; pfam00395	SLH; SLH	1.2e-12; 3.2e-08										SLH
2061994184	sg4i_00204320	contig02344	Not Binned	442..1590(+)	S-layer homology domain.	1149bp	382aa	0.58	Yes						pfam00395	SLH	3.7e-05										SLH
2061994432	sg4i_00206800	contig18314	Not Binned	9328..12042(-)	S-layer homology domain.	2715bp	904aa	0.65	Yes	Yes					pfam00395; pfam00395	SLH; SLH	6.8e-11; 2.4e-07										SLH
2061995429	sg4i_00216770	contig18820	Not Binned	873..2102(+)	S-layer homology domain.	1230bp	409aa	0.64							pfam00395; pfam00395; pfam00395	SLH; SLH; SLH	1.2e-14; 5.6e-08; 3.2e-05										SLH
2061995430	sg4i_00216780	contig18820	Not Binned	2223..6089(+)	S-layer homology domain.	3867bp	1288aa	0.58	Yes						pfam00395; pfam00395; pfam00395	SLH; SLH; SLH	9.2e-10; 1.3e-05; 7.3e-05										SLH
2061995748	sg4i_00219960	contig01627	Not Binned	4109..4408(-)	S-layer homology domain.	300bp	99aa	0.69							pfam00395	SLH	1.5e-13										SLH
2061995858	sg4i_00221060	contig01628	Not Binned	3..2306(-)	Subtilisin-like serine proteases	2304bp	768aa	0.65			COG1404	Subtilisin-like serine proteases	2e-19	[O] Posttranslational modification, protein turnover, chaperones	pfam00082; pfam00395; pfam00395	Peptidase_S8; SLH; SLH	5.2e-38; 3.4e-12; 7.7e-09										SLH
2061996550	sg4i_00227980	contig08936	Not Binned	99..1289(-)	S-layer homology domain.	1191bp	396aa	0.59	Yes	Yes					pfam00395	SLH	2.1e-09										SLH
2061997236	sg4i_00234840	contig00409	Not Binned	11..3799(+)	S-layer homology domain.	3789bp	1262aa	0.62	Yes						pfam00395; pfam00395; pfam00395	SLH; SLH; SLH	6.6e-10; 2.7e-07; 9.1e-06										SLH
2061997237	sg4i_00234850	contig00409	Not Binned	4211..7003(+)	S-layer homology domain.	2793bp	930aa	0.5	Yes						pfam00395	SLH	6.6e-09										SLH
2061998044	sg4i_00242920	contig12670	Not Binned	27..200(-)	S-layer homology domain.	174bp	57aa	0.52							pfam00395	SLH	2.9e-05										SLH
2061998045	sg4i_00242930	contig12670	Not Binned	486..791(-)	S-layer homology domain.	306bp	101aa	0.57	Yes	Yes					pfam00395	SLH	8.7e-16										SLH
2062001153	sg4i_00274010	contig09214	Not Binned	3918..4412(+)	S-layer homology domain.	495bp	165aa	0.65	Yes	Yes					pfam00395	SLH	4.5e-13										SLH
2062005049	sg4i_00312970	contig05615	Not Binned	189..449(-)	S-layer homology domain.	261bp	86aa	0.73							pfam00395	SLH	3.8e-06										SLH
2062008126	sg4i_00343740	contig09716	Not Binned	1360..1653(-)	S-layer homology domain.	294bp	97aa	0.68							pfam00395	SLH	1e-08										SLH
2062008812	sg4i_00350600	contig01760	Not Binned	4013..4969(-)	S-layer homology domain.	957bp	318aa	0.66	Yes	Yes					pfam00395	SLH	1e-06										SLH
2062009353	sg4i_00356010	contig04051	Not Binned	3..968(-)	ABC-type branched-chain amino acid transport systems, periplasmic component	966bp	322aa	0.63			COG0683	ABC-type branched-chain amino acid transport systems, periplasmic component	6e-11	[E] Amino acid transport and metabolism	pfam00395; pfam01094	SLH; ANF_receptor	6.8e-13; 9.2e-05										SLH
2062009771	sg4i_00360190	contig01116	Not Binned	8794..8997(-)	S-layer homology domain.	204bp	67aa	0.71							pfam00395	SLH	2.2e-10										SLH
2062010038	sg4i_00362860	contig10131	Not Binned	10..720(+)	S-layer homology domain.	711bp	237aa	0.59							pfam00395	SLH	1.9e-06										SLH
2062010497	sg4i_00367450	contig04326	Not Binned	1..633(+)	S-layer homology domain.	633bp	211aa	0.6							pfam00395; pfam00395	SLH; SLH	7.1e-13; 9.6e-08										SLH
2062011671	sg4i_00379190	contig18938	Not Binned	4738..6474(+)	S-layer homology domain.	1737bp	578aa	0.58	Yes						pfam00395	SLH	2e-07										SLH
2062012075	sg4i_00383230	contig02526	Not Binned	2..1834(+)	S-layer homology domain.	1833bp	610aa	0.65							pfam00395; pfam00395	SLH; SLH	3.8e-08; 1.4e-04										SLH
2062012189	sg4i_00384370	contig01798	Not Binned	2..1078(+)	S-layer homology domain.	1077bp	359aa	0.64	Yes						pfam00395	SLH	1.5e-12										SLH
2062012461	sg4i_00387090	contig04810	Not Binned	3..511(-)	S-layer homology domain.	509bp	170aa	0.69							pfam00395	SLH	1.3e-06										SLH
2062013472	sg4i_00397200	contig00538	Not Binned	68..1297(-)	S-layer homology domain.	1230bp	409aa	0.61	Yes	Yes					pfam00395; pfam00395	SLH; SLH	1.0e-14; 4.7e-10										SLH
2062013698	sg4i_00399460	contig05022	Not Binned	3..548(+)	S-layer homology domain.	546bp	182aa	0.69							pfam00395	SLH	2.2e-09										SLH
2062014911	sg4i_00411590	contig18463	Not Binned	8048..9244(+)	S-layer homology domain.	1197bp	398aa	0.61	Yes	Yes					pfam00395	SLH	2e-07										SLH
2062015637	sg4i_00418850	contig05639	Not Binned	2..238(+)	S-layer homology domain.	237bp	78aa	0.62							pfam00395	SLH	8.1e-07										SLH
2062019874	sg4i_00461220	contig14850	Not Binned	5..499(-)	S-layer homology domain.	495bp	165aa	0.6							pfam00395; pfam00395	SLH; SLH	1.3e-08; 3.5e-07										SLH
2062020483	sg4i_00467310	contig12956	Not Binned	1..1389(+)	Beta-lactamase class C and other penicillin binding proteins	1389bp	462aa	0.66			COG1680	Beta-lactamase class C and other penicillin binding proteins	8e-06	[V] Defense mechanisms	pfam00144; pfam00395; pfam00395	Beta-lactamase; SLH; SLH	2.7e-09; 3.0e-11; 4.9e-06										SLH
2062021443	sg4i_00476910	contig07863	Not Binned	284..490(+)	S-layer homology domain.	207bp	69aa	0.59							pfam00395	SLH	3.2e-07										SLH
2062021552	sg4i_00478000	contig00614	Not Binned	2459..3685(-)	S-layer homology domain.	1227bp	408aa	0.6	Yes	Yes					pfam00395; pfam00395; pfam00395	SLH; SLH; SLH	5.5e-10; 1.2e-09; 1.1e-04										SLH
2062023595	sg4i_00498430	contig09998	Not Binned	95..472(-)	S-layer homology domain.	378bp	126aa	0.71	Yes	Yes					pfam00395	SLH	8.6e-13										SLH
2062024870	sg4i_00511180	contig13547	Not Binned	186..611(-)	S-layer homology domain.	426bp	142aa	0.73	Yes						pfam00395; pfam00395	SLH; SLH	6.4e-14; 9.8e-06										SLH
2062025534	sg4i_00517820	contig13194	Not Binned	19926..20435(+)	S-layer homology domain.	510bp	170aa	0.66	Yes						pfam00395; pfam00395	SLH; SLH	1.2e-14; 1.6e-11										SLH
2062026210	sg4i_00524580	contig00662	Not Binned	7323..9980(+)	Prenyltransferase, beta subunit	2658bp	885aa	0.7			COG5029	Prenyltransferase, beta subunit	1e-06	[O] Posttranslational modification, protein turnover, chaperones	pfam00395; pfam00395; pfam00395; pfam00432	SLH; SLH; SLH; Prenyltrans	6.6e-11; 1.4e-08; 8.7e-06; 5.4e-05										SLH
2062028886	sg4i_00551340	contig01987	Not Binned	2..739(-)	S-layer homology domain.	738bp	246aa	0.64	Yes	Yes					pfam00395; pfam00395	SLH; SLH	8.2e-10; 1.6e-07										SLH
2062030652	sg4i_00569000	contig06922	Not Binned	12..308(-)	S-layer homology domain.	297bp	99aa	0.64							pfam00395	SLH	7.5e-11										SLH
2062030743	sg4i_00569910	contig03350	Not Binned	215..565(+)	hypothetical protein	351bp	116aa	0.56																			SLH
2062030773	sg4i_00570210	contig01319	Not Binned	1809..2771(+)	S-layer homology domain.	963bp	320aa	0.58	Yes	Yes					pfam00395	SLH	6.7e-08										SLH
2062032127	sg4i_00583750	contig18653	Not Binned	1532..2935(-)	Uncharacterized protein conserved in bacteria	1404bp	467aa	0.74	Yes		COG3883	Uncharacterized protein conserved in bacteria	1e-06	[S] Function unknown	pfam00395	SLH	1.9e-10										SLH
2062033082	sg4i_00593300	contig04923	Not Binned	2..1066(+)	S-layer homology domain.	1065bp	355aa	0.66							pfam00395; pfam00395	SLH; SLH	6.4e-14; 5.1e-06										SLH
2062033172	sg4i_00594200	contig16159	Not Binned	28..213(-)	S-layer homology domain.	186bp	62aa	0.65							pfam00395	SLH	1.3e-11										SLH
2062033403	sg4i_00596510	contig03608	Not Binned	1378..1761(+)	S-layer homology domain.	384bp	128aa	0.6							pfam00395	SLH	1.3e-06										SLH
2062034129	sg4i_00603770	contig14279	Not Binned	51..554(+)	S-layer homology domain.	504bp	167aa	0.5							pfam00395	SLH	6.9e-06										SLH
2062034585	sg4i_00608330	contig14006	Not Binned	2..496(+)	S-layer homology domain.	495bp	165aa	0.64							pfam00395; pfam00395	SLH; SLH	2.2e-06; 1.4e-05										SLH
2062036161	sg4i_00624090	contig00817	Not Binned	3..548(+)	S-layer homology domain.	546bp	181aa	0.69							pfam00395; pfam00395; pfam00395	SLH; SLH; SLH	6.4e-14; 5.2e-12; 2.9e-07										SLH
2061992345	sg4i_00185930	contig13519	Not Binned	2..814(+)	S-layer homology domain.	813bp	270aa	0.64							pfam00395; pfam00395; pfam00395	SLH; SLH; SLH	3.7e-12; 7.0e-11; 8.5e-11										SLH	CBM3	3.2.1.-
2061999734	sg4i_00259820	contig01420	Not Binned	1..719(+)	S-layer homology domain.	719bp	240aa	0.61							pfam00395; pfam00395	SLH; SLH	5.4e-13; 4.9e-08										SLH	GH111,CBM16	3.2.1.-
2062000813	sg4i_00270610	contig10763	Not Binned	775..1326(-)	S-layer homology domain.	552bp	183aa	0.66	Yes						pfam00395; pfam00395; pfam00395	SLH; SLH; SLH	8.4e-10; 1.8e-07; 4.5e-06										SLH	GH111,CBM16	3.2.1.-
2062017340	sg4i_00435880	contig04918	Not Binned	7..510(+)	S-layer homology domain.	504bp	167aa	0.67	Yes						pfam00395; pfam00395; pfam00395	SLH; SLH; SLH	2.6e-15; 6.6e-09; 1.9e-05										SLH	GH111,CBM16	3.2.1.-
2062017689	sg4i_00439370	contig16050	Not Binned	1288..2799(-)	S-layer homology domain.	1512bp	503aa	0.57							pfam00395; pfam00395; pfam00395	SLH; SLH; SLH	8.3e-17; 2.8e-12; 4.8e-08										SLH	GH111,CBM16	3.2.1.-
2062022988	sg4i_00492360	contig20027	Not Binned	532..2625(-)	S-layer homology domain.	2094bp	697aa	0.55							pfam00395; pfam00395; pfam00395	SLH; SLH; SLH	1.3e-16; 4.2e-12; 2.0e-09										SLH	GH111,CBM16	3.2.1.-
2062025200	sg4i_00514480	contig01261	Not Binned	3..2207(+)	Subtilisin-like serine proteases	2205bp	735aa	0.68			COG1404	Subtilisin-like serine proteases	1e-08	[O] Posttranslational modification, protein turnover, chaperones	pfam00082; pfam00395; pfam00395	Peptidase_S8; SLH; SLH	2.1e-28; 4.8e-13; 6.9e-10										SLH	GH111,CBM16	3.2.1.-
2062029207	sg4i_00554550	contig01384	Not Binned	2846..4189(-)	S-layer homology domain.	1344bp	447aa	0.65							pfam00395; pfam00395; pfam00395	SLH; SLH; SLH	1.1e-13; 1.5e-12; 1.9e-04										SLH	GH111,CBM16	3.2.1.-
2062032658	sg4i_00589060	contig03501	Not Binned	3..572(+)	S-layer homology domain.	570bp	189aa	0.54							pfam00395; pfam00395; pfam00395	SLH; SLH; SLH	2.3e-17; 1.8e-10; 1.4e-08										SLH	GH13,CBM20,CBM34	3.2.1.1,3.2.1.41
2062013822	sg4i_00400700	contig01812	Not Binned	751..1983(-)	S-layer homology domain.	1233bp	410aa	0.64							pfam00395; pfam00395	SLH; SLH	6.8e-10; 1.2e-08										SLH	GH13,CBM20,CBM34,CBM48	3.2.1.1,3.2.1.41
2062022846	sg4i_00490940	contig06877	Not Binned	3..731(+)	S-layer homology domain.	729bp	242aa	0.62							pfam00395; pfam00395; pfam00395	SLH; SLH; SLH	7.3e-12; 5.1e-11; 8.6e-10										SLH	GH13,CBM20,CBM34,CBM48	3.2.1.1,3.2.1.41
2062024697	sg4i_00509450	contig04418	Not Binned	325..864(+)	S-layer homology domain.	540bp	179aa	0.63							pfam00395; pfam00395; pfam00395	SLH; SLH; SLH	1.1e-14; 3.2e-12; 3.6e-10										SLH	GH16,CBM4	3.2.1.73,3.2.1.6
2062021916	sg4i_00481640	contig12128	Not Binned	46..774(-)	Protocatechuate 3,4-dioxygenase beta subunit	729bp	242aa	0.66	Yes		COG3485	Protocatechuate 3,4-dioxygenase beta subunit	2e-19	[Q] Secondary metabolites biosynthesis, transport and catabolism	pfam00775	Dioxygenase_C	2e-13	KO:K03381	catechol 1,2-dioxygenase [EC:1.13.11.1]	5e-124		TIGR01409	Tat (twin-arginine translocation) pathway signal sequence	9.8e-05	1.13.11.1	Catechol 1,2-dioxygenase.		LO1
2061984247	sg4i_00104950	contig18248	Not Binned	375..1334(-)	Pyruvate/2-oxoglutarate dehydrogenase complex, dihydrolipoamide dehydrogenase (E3) component, and related enzymes	960bp	319aa	0.68			COG1249	Pyruvate/2-oxoglutarate dehydrogenase complex, dihydrolipoamide dehydrogenase (E3) component, and related enzymes	4e-94	[C] Energy production and conversion	pfam00070; pfam02852; pfam07992	Pyr_redox; Pyr_redox_dim; Pyr_redox_2	1.6e-21; 8.9e-37; 6.6e-21											LO3
2061988636	sg4i_00148840	contig20776	Not Binned	1..933(-)	dihydrolipoamide dehydrogenase (EC 1.8.1.4)	933bp	311aa	0.7			COG1249	Pyruvate/2-oxoglutarate dehydrogenase complex, dihydrolipoamide dehydrogenase (E3) component, and related enzymes	1e-85	[C] Energy production and conversion	pfam00070; pfam07992	Pyr_redox; Pyr_redox_2	1.4e-20; 1.1e-40											LO3
2061994599	sg4i_00208470	contig20819	Not Binned	461..1309(-)	dihydrolipoamide dehydrogenase (EC 1.8.1.4)	849bp	282aa	0.69			COG1249	Pyruvate/2-oxoglutarate dehydrogenase complex, dihydrolipoamide dehydrogenase (E3) component, and related enzymes	1e-85	[C] Energy production and conversion	pfam00070; pfam02852; pfam07992	Pyr_redox; Pyr_redox_dim; Pyr_redox_2	6.0e-13; 6.2e-38; 3.5e-11											LO3
2061995785	sg4i_00220330	contig18323	Not Binned	7317..8873(+)	dihydrolipoamide dehydrogenase (EC 1.8.1.4)	1557bp	518aa	0.66			COG1249	Pyruvate/2-oxoglutarate dehydrogenase complex, dihydrolipoamide dehydrogenase (E3) component, and related enzymes	2e-99	[C] Energy production and conversion	pfam00070; pfam07992	Pyr_redox; Pyr_redox_2	4.7e-19; 2.5e-44	KO:K00382	dihydrolipoamide dehydrogenase [EC:1.8.1.4]	1e-122	M00009: Citrate cycle (TCA cycle, Krebs cycle); M00011: Citrate cycle, second carbon oxidation; M00058: Leucine degradation, leucine => acetoacetate + acetyl-CoA; M00059: Isoleucine degradation, isoleucine => propionyl-CoA; M00679: Pyruvate oxidation, pyruvate => acetyl-CoA				1.8.1.4	Dihydrolipoyl dehydrogenase.		LO3
2062000850	sg4i_00270980	contig19624	Not Binned	1961..3331(+)	mercuric reductase	1371bp	456aa	0.73	Yes		COG1249	Pyruvate/2-oxoglutarate dehydrogenase complex, dihydrolipoamide dehydrogenase (E3) component, and related enzymes	6e-112	[C] Energy production and conversion	pfam00070; pfam02852; pfam07992	Pyr_redox; Pyr_redox_dim; Pyr_redox_2	1.1e-17; 8.4e-26; 2.0e-41	KO:K00520	mercuric reductase [EC:1.16.1.1]			TIGR02053	mercuric reductase		1.16.1.1	Mercury(II) reductase.		LO3
2062010077	sg4i_00363250	contig03236	Not Binned	1..1650(+)	dihydrolipoamide dehydrogenase (EC 1.8.1.4)	1650bp	550aa	0.73			COG1249	Pyruvate/2-oxoglutarate dehydrogenase complex, dihydrolipoamide dehydrogenase (E3) component, and related enzymes		[C] Energy production and conversion	pfam00070; pfam00198; pfam02852; pfam07992	Pyr_redox; 2-oxoacid_dh; Pyr_redox_dim; Pyr_redox_2	8.2e-16; 4.0e-12; 1.1e-33; 2.0e-43	KO:K00382	dihydrolipoamide dehydrogenase [EC:1.8.1.4]		M00009: Citrate cycle (TCA cycle, Krebs cycle); M00011: Citrate cycle, second carbon oxidation; M00058: Leucine degradation, leucine => acetoacetate + acetyl-CoA; M00059: Isoleucine degradation, isoleucine => propionyl-CoA; M00679: Pyruvate oxidation, pyruvate => acetyl-CoA	TIGR01350	dihydrolipoamide dehydrogenase		1.8.1.4	Dihydrolipoyl dehydrogenase.		LO3
2062012446	sg4i_00386940	contig10696	Not Binned	3..935(-)	Pyruvate/2-oxoglutarate dehydrogenase complex, dihydrolipoamide dehydrogenase (E3) component, and related enzymes	933bp	311aa	0.69	Yes		COG1249	Pyruvate/2-oxoglutarate dehydrogenase complex, dihydrolipoamide dehydrogenase (E3) component, and related enzymes	1e-78	[C] Energy production and conversion	pfam00070; pfam02852; pfam07992	Pyr_redox; Pyr_redox_dim; Pyr_redox_2	1.6e-18; 5.9e-31; 7.9e-15											LO3
2062015542	sg4i_00417900	contig01169	Not Binned	1229..2650(-)	dihydrolipoamide dehydrogenase	1422bp	473aa	0.65			COG1249	Pyruvate/2-oxoglutarate dehydrogenase complex, dihydrolipoamide dehydrogenase (E3) component, and related enzymes		[C] Energy production and conversion	pfam00070; pfam02852; pfam07992	Pyr_redox; Pyr_redox_dim; Pyr_redox_2	3.3e-19; 1.1e-34; 4.7e-47	KO:K00382	dihydrolipoamide dehydrogenase [EC:1.8.1.4]		M00009: Citrate cycle (TCA cycle, Krebs cycle); M00011: Citrate cycle, second carbon oxidation; M00058: Leucine degradation, leucine => acetoacetate + acetyl-CoA; M00059: Isoleucine degradation, isoleucine => propionyl-CoA; M00679: Pyruvate oxidation, pyruvate => acetyl-CoA	TIGR01350	dihydrolipoamide dehydrogenase		1.8.1.4	Dihydrolipoyl dehydrogenase.		LO3
2062016322	sg4i_00425700	contig01843	Not Binned	704..1837(+)	Pyruvate/2-oxoglutarate dehydrogenase complex, dihydrolipoamide dehydrogenase (E3) component, and related enzymes	1134bp	378aa	0.67			COG1249	Pyruvate/2-oxoglutarate dehydrogenase complex, dihydrolipoamide dehydrogenase (E3) component, and related enzymes	5e-110	[C] Energy production and conversion	pfam00070; pfam02852; pfam07992	Pyr_redox; Pyr_redox_dim; Pyr_redox_2	9.5e-17; 7.6e-06; 6.6e-45	KO:K00382	dihydrolipoamide dehydrogenase [EC:1.8.1.4]	6e-95	M00009: Citrate cycle (TCA cycle, Krebs cycle); M00011: Citrate cycle, second carbon oxidation; M00058: Leucine degradation, leucine => acetoacetate + acetyl-CoA; M00059: Isoleucine degradation, isoleucine => propionyl-CoA; M00679: Pyruvate oxidation, pyruvate => acetyl-CoA				1.8.1.4	Dihydrolipoyl dehydrogenase.		LO3
2062016388	sg4i_00426360	contig20991	Not Binned	497..1177(-)	dihydrolipoamide dehydrogenase (EC 1.8.1.4)	681bp	226aa	0.7			COG1249	Pyruvate/2-oxoglutarate dehydrogenase complex, dihydrolipoamide dehydrogenase (E3) component, and related enzymes	2e-68	[C] Energy production and conversion	pfam02852; pfam07992	Pyr_redox_dim; Pyr_redox_2	1.7e-38; 2.5e-10											LO3
2062018154	sg4i_00444020	contig12750	Not Binned	1..906(+)	dihydrolipoamide dehydrogenase (EC 1.8.1.4)	906bp	302aa	0.66			COG1249	Pyruvate/2-oxoglutarate dehydrogenase complex, dihydrolipoamide dehydrogenase (E3) component, and related enzymes	4e-78	[C] Energy production and conversion	pfam00070; pfam02852; pfam07992	Pyr_redox; Pyr_redox_dim; Pyr_redox_2	4.6e-17; 7.6e-22; 7.5e-22											LO3
2062018285	sg4i_00445330	contig15963	Not Binned	2..630(-)	dihydrolipoamide dehydrogenase (EC 1.8.1.4)	629bp	209aa	0.7			COG1249	Pyruvate/2-oxoglutarate dehydrogenase complex, dihydrolipoamide dehydrogenase (E3) component, and related enzymes	2e-64	[C] Energy production and conversion	pfam00070; pfam02852; pfam07992	Pyr_redox; Pyr_redox_dim; Pyr_redox_2	4.6e-15; 8.3e-13; 2.2e-11											LO3
2062024174	sg4i_00504220	contig13005	Not Binned	1..1098(+)	Pyruvate/2-oxoglutarate dehydrogenase complex, dihydrolipoamide dehydrogenase (E3) component, and related enzymes	1098bp	365aa	0.71			COG1249	Pyruvate/2-oxoglutarate dehydrogenase complex, dihydrolipoamide dehydrogenase (E3) component, and related enzymes	1e-90	[C] Energy production and conversion	pfam00070; pfam02852; pfam07992	Pyr_redox; Pyr_redox_dim; Pyr_redox_2	1.9e-19; 1.9e-30; 6.4e-26	KO:K00382	dihydrolipoamide dehydrogenase [EC:1.8.1.4]	2e-115	M00009: Citrate cycle (TCA cycle, Krebs cycle); M00011: Citrate cycle, second carbon oxidation; M00058: Leucine degradation, leucine => acetoacetate + acetyl-CoA; M00059: Isoleucine degradation, isoleucine => propionyl-CoA; M00679: Pyruvate oxidation, pyruvate => acetyl-CoA				1.8.1.4	Dihydrolipoyl dehydrogenase.		LO3
2062026873	sg4i_00531210	contig18012	Not Binned	497..1000(-)	dihydrolipoamide dehydrogenase (EC 1.8.1.4)	504bp	167aa	0.69			COG1249	Pyruvate/2-oxoglutarate dehydrogenase complex, dihydrolipoamide dehydrogenase (E3) component, and related enzymes	2e-45	[C] Energy production and conversion	pfam02852	Pyr_redox_dim	2.6e-39											LO3
2062029087	sg4i_00553350	contig16349	Not Binned	3..338(-)	dihydrolipoamide dehydrogenase (EC 1.8.1.4)	336bp	112aa	0.69			COG1249	Pyruvate/2-oxoglutarate dehydrogenase complex, dihydrolipoamide dehydrogenase (E3) component, and related enzymes	2e-33	[C] Energy production and conversion	pfam07992	Pyr_redox_2	3.9e-18											LO3
2062029359	sg4i_00556070	contig17829	Not Binned	156..1370(+)	dihydrolipoamide dehydrogenase (EC 1.8.1.4)	1215bp	405aa	0.68			COG1249	Pyruvate/2-oxoglutarate dehydrogenase complex, dihydrolipoamide dehydrogenase (E3) component, and related enzymes		[C] Energy production and conversion	pfam00070; pfam02852; pfam07992	Pyr_redox; Pyr_redox_dim; Pyr_redox_2	6.6e-19; 1.5e-25; 1.9e-50	KO:K00382	dihydrolipoamide dehydrogenase [EC:1.8.1.4]		M00009: Citrate cycle (TCA cycle, Krebs cycle); M00011: Citrate cycle, second carbon oxidation; M00058: Leucine degradation, leucine => acetoacetate + acetyl-CoA; M00059: Isoleucine degradation, isoleucine => propionyl-CoA; M00679: Pyruvate oxidation, pyruvate => acetyl-CoA	TIGR01350	dihydrolipoamide dehydrogenase		1.8.1.4	Dihydrolipoyl dehydrogenase.		LO3
2062029453	sg4i_00557010	contig17830	Not Binned	87..1313(+)	dihydrolipoamide dehydrogenase (EC 1.8.1.4)	1227bp	409aa	0.69			COG1249	Pyruvate/2-oxoglutarate dehydrogenase complex, dihydrolipoamide dehydrogenase (E3) component, and related enzymes		[C] Energy production and conversion	pfam00070; pfam02852; pfam07992	Pyr_redox; Pyr_redox_dim; Pyr_redox_2	1.2e-18; 2.0e-26; 7.9e-51	KO:K00382	dihydrolipoamide dehydrogenase [EC:1.8.1.4]		M00009: Citrate cycle (TCA cycle, Krebs cycle); M00011: Citrate cycle, second carbon oxidation; M00058: Leucine degradation, leucine => acetoacetate + acetyl-CoA; M00059: Isoleucine degradation, isoleucine => propionyl-CoA; M00679: Pyruvate oxidation, pyruvate => acetyl-CoA	TIGR01350	dihydrolipoamide dehydrogenase		1.8.1.4	Dihydrolipoyl dehydrogenase.		LO3
2062032432	sg4i_00586800	contig03599	Not Binned	3..935(-)	Pyruvate/2-oxoglutarate dehydrogenase complex, dihydrolipoamide dehydrogenase (E3) component, and related enzymes	933bp	311aa	0.68			COG1249	Pyruvate/2-oxoglutarate dehydrogenase complex, dihydrolipoamide dehydrogenase (E3) component, and related enzymes	9e-79	[C] Energy production and conversion	pfam00070; pfam07992	Pyr_redox; Pyr_redox_2	1.2e-20; 8.1e-30											LO3
2062038020	sg4i_00642680	contig01454	Not Binned	3588..4985(+)	dihydrolipoamide dehydrogenase (EC 1.8.1.4)	1398bp	465aa	0.63			COG1249	Pyruvate/2-oxoglutarate dehydrogenase complex, dihydrolipoamide dehydrogenase (E3) component, and related enzymes		[C] Energy production and conversion	pfam00070; pfam02852; pfam07992	Pyr_redox; Pyr_redox_dim; Pyr_redox_2	1.9e-18; 1.0e-40; 2.0e-49	KO:K00382	dihydrolipoamide dehydrogenase [EC:1.8.1.4]		M00009: Citrate cycle (TCA cycle, Krebs cycle); M00011: Citrate cycle, second carbon oxidation; M00058: Leucine degradation, leucine => acetoacetate + acetyl-CoA; M00059: Isoleucine degradation, isoleucine => propionyl-CoA; M00679: Pyruvate oxidation, pyruvate => acetyl-CoA	TIGR01350	dihydrolipoamide dehydrogenase		1.8.1.4	Dihydrolipoyl dehydrogenase.		LO3
2061975477	sg4i_00017250	contig00232	Paenibacillus	322382..323242(-)	conserved hypothetical protein TIGR00726	861bp	286aa	0.69			COG1496	Uncharacterized conserved protein	1e-59	[S] Function unknown	pfam02578	Cu-oxidase_4	4.5e-73	KO:K05810	conserved hypothetical protein	2e-65		TIGR00726	conserved hypothetical protein TIGR00726	9.8e-67						Laccase
2061975822	sg4i_00020700	contig18204	Paenibacillus	15133..16221(-)	Putative multicopper oxidases	1089bp	362aa	0.65	Yes	Yes	COG2132	Putative multicopper oxidases	2e-14	[Q] Secondary metabolites biosynthesis, transport and catabolism	pfam00394; pfam07732	Cu-oxidase; Cu-oxidase_3	1.7e-03; 3.1e-13	KO:K00368	nitrite reductase (NO-forming) [EC:1.7.2.1]	7e-104		TIGR02376	nitrite reductase, copper-containing	4.4e-54	1.7.2.1	Nitrite reductase (NO-forming).				Laccase
2061978741	sg4i_00049890	contig18216	Paenibacillus	35187..37436(+)	Putative multicopper oxidases	2250bp	749aa	0.67	Yes	Yes	COG2132	Putative multicopper oxidases	1e-47	[Q] Secondary metabolites biosynthesis, transport and catabolism	pfam07731; pfam07732	Cu-oxidase_2; Cu-oxidase_3	3.6e-27; 7.3e-34													Laccase
2061976892	sg4i_00031400	contig18208	Paenibacillus	28132..31068(+)	carbohydrate ABC transporter substrate-binding protein, CUT1 family (TC 3.A.1.1.-)	2937bp	978aa	0.63	Yes	Yes	COG1653	ABC-type sugar transport system, periplasmic component	1e-24	[G] Carbohydrate transport and metabolism	pfam01547	SBP_bac_1	5.5e-18										CBM35
2061979675	sg4i_00059230	contig18221	Paenibacillus	46718..49432(-)	Bacterial Ig-like domain (group 4)./Fibronectin type III domain./S-layer homology domain.	2715bp	904aa	0.56							pfam00041; pfam00395; pfam00395; pfam00395; pfam07532; pfam07532; pfam07532	fn3; SLH; SLH; SLH; Big_4; Big_4; Big_4	4.7e-07; 1.7e-13; 4.3e-12; 7.3e-08; 1.1e-11; 2.1e-10; 3.5e-06										CBM37, SLH
2061990434	sg4i_00166820	contig18786	Paenibacillus	1618..6843(+)	Fibronectin type III domain./S-layer homology domain.	5226bp	1741aa	0.6	Yes						pfam00041; pfam00395; pfam00395	fn3; SLH; SLH	4.7e-09; 5.2e-15; 3.8e-08					TIGR01435	glutamate--cysteine ligase/gamma-glutamylcysteine synthetase, Streptococcus agalactiae type	0.062			CBM37, SLH	GH13,CBM20,CBM34,CBM48	3.2.1.1,3.2.1.41
2061974192	sg4i_00004400	contig18198	Paenibacillus	15584..16387(-)	Predicted glycosyl hydrolase	804bp	267aa	0.67			COG3858	Predicted glycosyl hydrolase	7e-08	[R] General function prediction only	pfam01476; pfam01476; pfam01476; pfam10648	LysM; LysM; LysM; Gmad2	1.8e-09; 7.2e-09; 2.4e-05; 1.9e-18										CBM50
2062007921	sg4i_00341690	contig06154	Paenibacillus	41824..42204(-)	LysM domain.	381bp	126aa	0.66	Yes	Yes					pfam01476	LysM	5.1e-09										CBM50
2062037910	sg4i_00641580	contig18195	Paenibacillus	82393..83550(+)	LysM domain.	1158bp	385aa	0.7							pfam01476	LysM	3.1e-07					TIGR02907	stage VI sporulation protein D	1.1e-11			CBM50
2062037943	sg4i_00641910	contig18195	Paenibacillus	113371..114606(+)	LysM domain.	1236bp	411aa	0.74							pfam01476	LysM	3.6e-10										CBM50
2061975854	sg4i_00021020	contig18204	Paenibacillus	47818..49383(-)	Membrane proteins related to metalloendopeptidases	1566bp	521aa	0.6			COG0739	Membrane proteins related to metalloendopeptidases	7e-31	[M] Cell wall/membrane/envelope biogenesis	pfam01551; pfam07501	Peptidase_M23; G5	2.6e-32; 3.8e-18										CBM50	GH23
2061978707	sg4i_00049550	contig18216	Paenibacillus	577..4563(-)	S-layer homology domain.	3987bp	1328aa	0.63	Yes	Yes					pfam00395; pfam00395; pfam00395	SLH; SLH; SLH	4.5e-13; 3.1e-09; 2.3e-05										CBM54, SLH	GH16,CBM4	3.2.1.73,3.2.1.6
2062037544	sg4i_00637920	contig18194	Paenibacillus	30658..31554(-)	Copper amine oxidase N-terminal domain.	897bp	298aa	0.59	Yes	Yes					pfam07833; pfam07833	Cu_amine_oxidN1; Cu_amine_oxidN1	9.3e-17; 7.0e-06										CBM57
2062019306	sg4i_00455540	contig00009	Paenibacillus	16184..18445(+)	Beta-glucosidase-related glycosidases	2262bp	753aa	0.67			COG1472	Beta-glucosidase-related glycosidases	1e-23	[G] Carbohydrate transport and metabolism	pfam00933; pfam01915	Glyco_hydro_3; Glyco_hydro_3_C	2.5e-11; 9.3e-62	KO:K05349; KO:K01188	beta-glucosidase [EC:3.2.1.21]; beta-glucosidase [EC:3.2.1.21]	0.0e+00; 0.0e+00					3.2.1.21	Beta-glucosidase.	CBM6	GH3,CBM6	3.2.1.74
2061992502	sg4i_00187500	contig18299	Paenibacillus	13018..15015(+)	Arabinose efflux permease	1998bp	665aa	0.62		Yes	COG2814	Arabinose efflux permease	4e-22	[G] Carbohydrate transport and metabolism	pfam05977; pfam07690; pfam10503	DUF894; MFS_1; Esterase_phd	2.0e-07; 9.0e-20; 3.3e-07										CE1
2062006120	sg4i_00323680	contig00006	Paenibacillus	8717..11014(+)	Dipeptidyl aminopeptidases/acylaminoacyl-peptidases	2298bp	765aa	0.69	Yes	Yes	COG1506	Dipeptidyl aminopeptidases/acylaminoacyl-peptidases	1e-05	[E] Amino acid transport and metabolism	pfam07224	Chlorophyllase	3.9e-06										CE1
2062035518	sg4i_00617660	contig10872	Paenibacillus	2770..3498(+)	Enterochelin esterase and related enzymes	729bp	242aa	0.68			COG2382	Enterochelin esterase and related enzymes	1e-33	[P] Inorganic ion transport and metabolism	pfam00756	Esterase	9.7e-32	KO:K07214	enterochelin esterase and related enzymes	8e-55							CE1	CE1
2061976489	sg4i_00027370	contig18207	Paenibacillus	74899..75684(-)	Predicted esterase	786bp	261aa	0.62			COG0627	Predicted esterase	3e-25	[R] General function prediction only	pfam00756	Esterase	5.7e-17	KO:K03930	putative tributyrin esterase [EC:3.1.1.-]	6e-76					3.1.1.-	Hydrolases. Acting on ester bonds. Carboxylic ester hydrolases.	CE1	CE1	3.1.1.1
2061992494	sg4i_00187420	contig18299	Paenibacillus	8061..8933(+)	Predicted esterase	873bp	290aa	0.61			COG0627	Predicted esterase	5e-21	[R] General function prediction only	pfam00756	Esterase	8.4e-15										CE1	CE1	3.1.1.1
2061979627	sg4i_00058750	contig18221	Paenibacillus	947..1993(-)	Enterochelin esterase and related enzymes	1047bp	348aa	0.67			COG2382	Enterochelin esterase and related enzymes	3e-09	[P] Inorganic ion transport and metabolism	pfam00756	Esterase	4.8e-10	KO:K07214	enterochelin esterase and related enzymes	8e-94							CE1	CE6,CE1
2062038364	sg4i_00646120	contig18197	Paenibacillus	111272..113350(-)	Enterochelin esterase and related enzymes	2079bp	692aa	0.61	Yes	Yes	COG2382	Enterochelin esterase and related enzymes	1e-10	[P] Inorganic ion transport and metabolism	pfam02368; pfam06452	Big_2; DUF1083	5.0e-08; 7.5e-45										CE1, CBM9	GH10,CE1,CBM22	3.2.1.8,3.1.1.73
2061977887	sg4i_00041350	contig18212	Paenibacillus	16324..19458(-)	Predicted peptidase	3135bp	1044aa	0.62			COG4099	Predicted peptidase	2e-17	[R] General function prediction only	pfam00041; pfam00395; pfam00395; pfam00395; pfam06452; pfam10503	fn3; SLH; SLH; SLH; DUF1083; Esterase_phd	4.7e-14; 4.8e-11; 5.8e-07; 2.7e-06; 3.7e-06; 4.8e-06										CE1, CBM9, SLH	CBM3	3.2.1.-
2061974440	sg4i_00006880	contig18199	Paenibacillus	31098..31955(-)	Prolyl oligopeptidase family.	858bp	285aa	0.65			COG1506	Dipeptidyl aminopeptidases/acylaminoacyl-peptidases	7e-14	[E] Amino acid transport and metabolism	pfam00326	Peptidase_S9	8.8e-11										CE1, CE7
2061976487	sg4i_00027350	contig18207	Paenibacillus	72819..73688(-)	Dipeptidyl aminopeptidases/acylaminoacyl-peptidases	870bp	289aa	0.61			COG1506	Dipeptidyl aminopeptidases/acylaminoacyl-peptidases	5e-23	[E] Amino acid transport and metabolism	pfam07859	Abhydrolase_3	5e-17										CE10
2061978749	sg4i_00049970	contig18216	Paenibacillus	45009..45500(+)	Esterase/lipase	492bp	163aa	0.67	Yes		COG0657	Esterase/lipase	9e-24	[I] Lipid transport and metabolism	pfam07859	Abhydrolase_3	1.7e-33										CE10
2062033014	sg4i_00592620	contig00137	Paenibacillus	43049..43951(-)	Esterase/lipase	903bp	300aa	0.63			COG0657	Esterase/lipase	2e-18	[I] Lipid transport and metabolism	pfam07859	Abhydrolase_3	2e-13	KO:K01181	endo-1,4-beta-xylanase [EC:3.2.1.8]	6e-48					3.2.1.8	Endo-1,4-beta-xylanase.	CE10	CE10	3.1.1.6
2061974461	sg4i_00007090	contig18199	Paenibacillus	56534..57187(+)	Lysophospholipase L1 and related esterases	654bp	217aa	0.65			COG2755	Lysophospholipase L1 and related esterases	8e-15	[E] Amino acid transport and metabolism	pfam00657	Lipase_GDSL	2.6e-15										CE12
2061975806	sg4i_00020540	contig18204	Paenibacillus	259..501(-)	hypothetical protein	243bp	80aa	0.71	Yes																		CE2
2061975224	sg4i_00014720	contig00232	Paenibacillus	72438..73307(-)	Lysophospholipase L1 and related esterases	870bp	289aa	0.69	Yes	Yes	COG2755	Lysophospholipase L1 and related esterases	5e-18	[E] Amino acid transport and metabolism	pfam00657	Lipase_GDSL	4.9e-22										CE3
2061978723	sg4i_00049710	contig18216	Paenibacillus	19642..20298(-)	Predicted xylanase/chitin deacetylase	657bp	218aa	0.63			COG0726	Predicted xylanase/chitin deacetylase	2e-24	[G] Carbohydrate transport and metabolism	pfam01522	Polysacc_deac_1	1e-33										CE4	CE4
2061987158	sg4i_00134060	contig13437	Paenibacillus	62168..62617(-)	Predicted xylanase/chitin deacetylase	450bp	149aa	0.6	Yes	Yes	COG0726	Predicted xylanase/chitin deacetylase	1e-21	[G] Carbohydrate transport and metabolism	pfam01522	Polysacc_deac_1	6e-22										CE4	CE4
2061975326	sg4i_00015740	contig00232	Paenibacillus	167557..168489(+)	Predicted xylanase/chitin deacetylase	933bp	310aa	0.68	Yes		COG0726	Predicted xylanase/chitin deacetylase	1e-28	[G] Carbohydrate transport and metabolism	pfam01522	Polysacc_deac_1	1.5e-31										CE4	CE4	3.1.1.-
2062000560	sg4i_00268080	contig15569	Paenibacillus	70959..72131(+)	Predicted xylanase/chitin deacetylase	1173bp	390aa	0.65	Yes	Yes	COG0726	Predicted xylanase/chitin deacetylase	6e-33	[G] Carbohydrate transport and metabolism	pfam01522	Polysacc_deac_1	2.2e-23					TIGR02873	probable sporulation protein, polysaccharide deacetylase family	4.9e-102			CE4	CE4	3.1.1.-
2062032797	sg4i_00590450	contig18063	Paenibacillus	30118..31971(+)	Domain of unknown function (DUF303).	1854bp	617aa	0.67							pfam02837; pfam03629	Glyco_hydro_2_N; DUF303	3.7e-10; 3.2e-33	KO:K05970	sialate O-acetylesterase [EC:3.1.1.53]						3.1.1.53	Sialate O-acetylesterase.	CE6
2061989687	sg4i_00159350	contig00345	Paenibacillus	1844..3133(-)	N-acetylglucosamine 6-phosphate deacetylase (EC 3.5.1.25)	1290bp	429aa	0.67			COG1820	N-acetylglucosamine-6-phosphate deacetylase	3e-70	[G] Carbohydrate transport and metabolism				KO:K01443	N-acetylglucosamine-6-phosphate deacetylase [EC:3.5.1.25]	2e-108		TIGR00221	N-acetylglucosamine-6-phosphate deacetylase	4.6e-56	3.5.1.25	N-acetylglucosamine-6-phosphate deacetylase.	CE9	CE9	3.5.1.25
2061981683	sg4i_00079310	contig18233	Paenibacillus	16497..17690(+)	N-acetylglucosamine 6-phosphate deacetylase (EC 3.5.1.25)	1194bp	397aa	0.71			COG1820	N-acetylglucosamine-6-phosphate deacetylase	3e-110	[G] Carbohydrate transport and metabolism	pfam01979	Amidohydro_1	5e-15	KO:K01443; KO:K02079	N-acetylglucosamine-6-phosphate deacetylase [EC:3.5.1.25]; N-acetylgalactosamine-6-phosphate deacetylase [EC:3.5.1.25]	8.0e-111; 2.0e-79		TIGR00221	N-acetylglucosamine-6-phosphate deacetylase	3.3e-90	3.5.1.25	N-acetylglucosamine-6-phosphate deacetylase.	CE9	CE9	3.5.1.80
2061979786	sg4i_00060340	contig18222	Paenibacillus	9070..10416(-)	broad-specificity cellobiase (EC 3.2.1.21)	1347bp	448aa	0.61			COG2723	Beta-glucosidase/6-phospho-beta-glucosidase/beta-galactosidase		[G] Carbohydrate transport and metabolism	pfam00232	Glyco_hydro_1		KO:K05350	beta-glucosidase [EC:3.2.1.21]			TIGR03356	beta-galactosidase		3.2.1.21	Beta-glucosidase.	GH1	GH1	3.2.1.21
2062006180	sg4i_00324280	contig00006	Paenibacillus	91524..92762(-)	Beta-1,4-xylanase	1239bp	412aa	0.62			COG3693	Beta-1,4-xylanase	3e-25	[G] Carbohydrate transport and metabolism	pfam00331	Glyco_hydro_10	2.6e-31										GH10	GH10	3.2.1.8
2062037631	sg4i_00638790	contig18194	Paenibacillus	123106..125427(-)	Beta-1,4-xylanase	2322bp	773aa	0.64	Yes	Yes	COG3693	Beta-1,4-xylanase	2e-81	[G] Carbohydrate transport and metabolism	pfam00331; pfam02018; pfam06452	Glyco_hydro_10; CBM_4_9; DUF1083	3.1e-112; 4.0e-19; 1.2e-50	KO:K01181	endo-1,4-beta-xylanase [EC:3.2.1.8]						3.2.1.8	Endo-1,4-beta-xylanase.	GH10, CBM9, CBM22	GH10,CBM22,CBM9	3.2.1.8
2061976243	sg4i_00024910	contig18206	Paenibacillus	33467..38302(+)	Beta-1,4-xylanase	4836bp	1611aa	0.6	Yes		COG3693	Beta-1,4-xylanase	6e-51	[G] Carbohydrate transport and metabolism	pfam00331; pfam00395; pfam00395; pfam00395; pfam02018; pfam02018; pfam02018; pfam06452	Glyco_hydro_10; SLH; SLH; SLH; CBM_4_9; CBM_4_9; CBM_4_9; DUF1083	4.0e-96; 2.0e-11; 3.4e-09; 1.6e-05; 7.1e-23; 2.1e-20; 7.5e-11; 4.1e-57										GH10, CBM9, CBM22, SLH	GH10,CBM22,CBM9	3.2.1.8
2061976034	sg4i_00022820	contig18205	Paenibacillus	45067..46419(+)	cytidyltransferase-related domain	1353bp	450aa	0.56			COG0673	Predicted dehydrogenases and related proteins	4e-31	[R] General function prediction only	pfam01408; pfam01467	GFO_IDH_MocA; CTP_transf_2	3.4e-21; 9.4e-12					TIGR00125; TIGR01518	cytidyltransferase-related domain; glycerol-3-phosphate cytidylyltransferase	1.9e-16; 2.6e-40			GH109
2061983401	sg4i_00096490	contig00298	Paenibacillus	28800..29792(-)	Predicted dehydrogenases and related proteins	993bp	330aa	0.63	Yes		COG0673	Predicted dehydrogenases and related proteins	2e-48	[R] General function prediction only	pfam01408; pfam02894	GFO_IDH_MocA; GFO_IDH_MocA_C	1.2e-22; 7.4e-09										GH109
2061989690	sg4i_00159380	contig00345	Paenibacillus	5500..6501(-)	Predicted dehydrogenases and related proteins	1002bp	333aa	0.63			COG0673	Predicted dehydrogenases and related proteins	2e-48	[R] General function prediction only	pfam01408; pfam02894	GFO_IDH_MocA; GFO_IDH_MocA_C	6.6e-21; 3.1e-10										GH109
2061989691	sg4i_00159390	contig00345	Paenibacillus	6502..7479(-)	Predicted dehydrogenases and related proteins	978bp	325aa	0.62			COG0673	Predicted dehydrogenases and related proteins	5e-54	[R] General function prediction only	pfam01408; pfam02894	GFO_IDH_MocA; GFO_IDH_MocA_C	3.1e-25; 1.0e-09	KO:K00010	myo-inositol 2-dehydrogenase [EC:1.1.1.18]	1e-86					1.1.1.18	Inositol 2-dehydrogenase.	GH109
2062000616	sg4i_00268640	contig15569	Paenibacillus	126611..127708(+)	Carbohydrate binding module (family 6)./Glycosyl hydrolases family 11.	1098bp	365aa	0.6	Yes	Yes					pfam00457; pfam03422	Glyco_hydro_11; CBM_6	3.0e-77; 1.1e-09										GH11, CBM36	GH11,CBM36	3.2.1.8
2061976890	sg4i_00031380	contig18208	Paenibacillus	25332..26312(-)	hypothetical protein	981bp	326aa	0.65																			GH113
2061976219	sg4i_00024670	contig18206	Paenibacillus	3163..6111(+)	hypothetical protein	2949bp	982aa	0.64																			GH115
2061975816	sg4i_00020640	contig18204	Paenibacillus	8521..10455(-)	Protein of unknown function (DUF1565).	1935bp	644aa	0.63							pfam07602	DUF1565	2.8e-05										GH120	GH0
2062032795	sg4i_00590430	contig18063	Paenibacillus	27678..29621(-)	Uncharacterized protein conserved in bacteria	1944bp	647aa	0.67			COG3533	Uncharacterized protein conserved in bacteria		[S] Function unknown	pfam07944	DUF1680		KO:K09955	hypothetical protein								GH127
2061976897	sg4i_00031450	contig18208	Paenibacillus	35017..37590(+)	hypothetical protein	2574bp	857aa	0.62	Yes	Yes																	GH129
2061979629	sg4i_00058770	contig18221	Paenibacillus	3551..5017(-)	Glycosidases	1467bp	488aa	0.64	Yes		COG0366	Glycosidases	9e-20	[G] Carbohydrate transport and metabolism	pfam00128	Alpha-amylase	3.6e-13	KO:K00690	sucrose phosphorylase [EC:2.4.1.7]	2e-119					2.4.1.7	Sucrose phosphorylase.	GH13	GH13	2.4.1.7
2061992496	sg4i_00187440	contig18299	Paenibacillus	10009..10548(+)	Glycosidases	540bp	179aa	0.57			COG0366	Glycosidases	4e-12	[G] Carbohydrate transport and metabolism	pfam00128	Alpha-amylase	1.4e-11										GH13	GH13	2.4.1.7
2062033001	sg4i_00592490	contig00137	Paenibacillus	25788..27371(-)	Glycosidases	1584bp	527aa	0.67	Yes	Yes	COG0366	Glycosidases	9e-79	[G] Carbohydrate transport and metabolism	pfam00128	Alpha-amylase	2.6e-97										GH13	GH13	3.2.1.1
2061974218	sg4i_00004660	contig18198	Paenibacillus	44893..46569(-)	Glycosidases	1677bp	558aa	0.62			COG0366	Glycosidases	2e-121	[G] Carbohydrate transport and metabolism	pfam00128	Alpha-amylase	5.2e-112	KO:K01182	oligo-1,6-glucosidase [EC:3.2.1.10]						3.2.1.10	Oligo-1,6-glucosidase.	GH13	GH13	3.2.1.10
2062033000	sg4i_00592480	contig00137	Paenibacillus	24070..25791(-)	Glycosidases	1722bp	573aa	0.62			COG0366	Glycosidases	1e-113	[G] Carbohydrate transport and metabolism	pfam00128	Alpha-amylase	5.8e-104	KO:K01187	alpha-glucosidase [EC:3.2.1.20]						3.2.1.20	Alpha-glucosidase.	GH13	GH13	3.2.1.20
2062033006	sg4i_00592540	contig00137	Paenibacillus	32617..34470(+)	neopullulanase (EC 3.2.1.135)/maltogenic amylase	1854bp	617aa	0.65			COG0366	Glycosidases	3e-66	[G] Carbohydrate transport and metabolism	pfam00128; pfam02903	Alpha-amylase; Alpha-amylase_N	4.9e-85; 1.4e-34										GH13, CBM34	GH13,CBM34	3.2.1.54
2062037523	sg4i_00637710	contig18194	Paenibacillus	1466..9187(-)	pullulanase, type I	7722bp	2573aa	0.64	Yes	Yes	COG1523	Type II secretory pathway, pullulanase PulA and related glycosidases	1e-124	[G] Carbohydrate transport and metabolism	pfam00128; pfam00128; pfam00128; pfam00395; pfam00395; pfam00395; pfam02368; pfam02368; pfam02922; pfam03714; pfam03714	Alpha-amylase; Alpha-amylase; Alpha-amylase; SLH; SLH; SLH; Big_2; Big_2; CBM_48; PUD; PUD	5.1e-62; 1.0e-11; 7.3e-10; 1.2e-12; 1.6e-11; 2.0e-08; 2.0e-11; 7.2e-09; 3.9e-15; 5.5e-15; 1.7e-09					TIGR02100; TIGR02104	glycogen debranching enzyme GlgX; pullulanase, type I	1.4e-37; 0.0e+00			GH13, CBM41, CBM48, SLH	GH13,CBM41,CBM48	3.2.1.1,3.2.1.41
2062037639	sg4i_00638870	contig18194	Paenibacillus	133342..134439(-)	Predicted glycosylase	1098bp	365aa	0.69			COG2152	Predicted glycosylase	2e-78	[G] Carbohydrate transport and metabolism	pfam04041	DUF377	2.6e-63										GH130	GT2
2061975211	sg4i_00014590	contig00232	Paenibacillus	57192..58712(+)	Predicted glycosyl hydrolase	1521bp	506aa	0.65			COG3858	Predicted glycosyl hydrolase	2e-39	[R] General function prediction only	pfam00704	Glyco_hydro_18	2.8e-34										GH18	GH18
2061985575	sg4i_00118230	contig18257	Paenibacillus	20837..22585(+)	Predicted glycosyl hydrolase	1749bp	582aa	0.63	Yes		COG3858	Predicted glycosyl hydrolase	1e-42	[R] General function prediction only	pfam00704; pfam07833; pfam08239	Glyco_hydro_18; Cu_amine_oxidN1; SH3_3	4.1e-28; 1.0e-04; 1.6e-06										GH18	GH18
2061975225	sg4i_00014730	contig00232	Paenibacillus	73383..74666(-)	Predicted glycosyl hydrolase	1284bp	427aa	0.67			COG3858	Predicted glycosyl hydrolase	2e-110	[R] General function prediction only	pfam00704; pfam01476; pfam01476	Glyco_hydro_18; LysM; LysM	4.8e-23; 9.9e-14; 1.2e-13	KO:K06306	spore germination protein	6e-120							GH18, CBM50	GH18,CBM50
2061976193	sg4i_00024410	contig13308	Paenibacillus	29898..33062(+)	Beta-galactosidase/beta-glucuronidase	3165bp	1054aa	0.61			COG3250	Beta-galactosidase/beta-glucuronidase		[G] Carbohydrate transport and metabolism	pfam00703; pfam02836; pfam02837; pfam02929	Glyco_hydro_2; Glyco_hydro_2_C; Glyco_hydro_2_N; Bgal_small_N	9.1e-16; 1.2e-110; 6.8e-54; 9.9e-70	KO:K01190; KO:K12111	beta-galactosidase [EC:3.2.1.23]; evolved beta-galactosidase subunit alpha [EC:3.2.1.23]	0.0e+00; 0.0e+00					3.2.1.23	Beta-galactosidase.	GH2	GH2	3.2.1.23
2061974420	sg4i_00006680	contig18199	Paenibacillus	15252..17921(+)	Beta-galactosidase/beta-glucuronidase	2670bp	889aa	0.65			COG3250	Beta-galactosidase/beta-glucuronidase	2e-74	[G] Carbohydrate transport and metabolism	pfam00703; pfam02837	Glyco_hydro_2; Glyco_hydro_2_N	3.3e-10; 8.3e-18	KO:K01192	beta-mannosidase [EC:3.2.1.25]						3.2.1.25	Beta-mannosidase.	GH2	GH2	3.2.1.25
2062005871	sg4i_00321190	contig00476	Paenibacillus	29603..32248(-)	beta-mannosidase (EC 3.2.1.25)	2646bp	881aa	0.66			COG3250	Beta-galactosidase/beta-glucuronidase	4e-96	[G] Carbohydrate transport and metabolism	pfam00703; pfam02836; pfam02837	Glyco_hydro_2; Glyco_hydro_2_C; Glyco_hydro_2_N	8.5e-10; 2.5e-07; 6.3e-11	KO:K01192	beta-mannosidase [EC:3.2.1.25]						3.2.1.25	Beta-mannosidase.	GH2	GH2	3.2.1.25
2061976236	sg4i_00024840	contig18206	Paenibacillus	22577..26110(+)	Beta-galactosidase/beta-glucuronidase	3534bp	1177aa	0.65			COG3250	Beta-galactosidase/beta-glucuronidase	6e-56	[G] Carbohydrate transport and metabolism	pfam00703; pfam02836; pfam02837	Glyco_hydro_2; Glyco_hydro_2_C; Glyco_hydro_2_N	1.8e-11; 7.4e-27; 2.6e-30										GH2, CBM6	GH2	3.2.1.23
2062033021	sg4i_00592690	contig00137	Paenibacillus	49725..50321(-)	Soluble lytic murein transglycosylase and related regulatory proteins (some contain LysM/invasin domains)	597bp	198aa	0.62	Yes		COG0741	Soluble lytic murein transglycosylase and related regulatory proteins (some contain LysM/invasin domains)	1e-19	[M] Cell wall/membrane/envelope biogenesis	pfam01464	SLT	1.7e-22	KO:K08309	soluble lytic murein transglycosylase [EC:3.2.1.-]	3e-42					3.2.1.-	Hydrolases. Glycosylases. Glycosidases, i.e. enzymes hydrolyzing O- and S-glycosyl compounds.	GH23	GH23
2062037569	sg4i_00638170	contig18194	Paenibacillus	53211..54662(+)	Beta-mannanase	1452bp	483aa	0.64			COG4124	Beta-mannanase	2e-14	[G] Carbohydrate transport and metabolism	pfam02156; pfam07691	Glyco_hydro_26; PA14	3.0e-76; 3.0e-32										GH26	GH26	3.2.1.78
2062037570	sg4i_00638180	contig18194	Paenibacillus	54779..55816(-)	Beta-mannanase	1038bp	345aa	0.62	Yes		COG4124	Beta-mannanase	7e-15	[G] Carbohydrate transport and metabolism	pfam02156	Glyco_hydro_26	2.7e-60										GH26	GH26	3.2.1.78
2061974230	sg4i_00004780	contig18198	Paenibacillus	67573..68832(-)	Alpha-galactosidase	1260bp	419aa	0.67			COG3345	Alpha-galactosidase	1e-05	[G] Carbohydrate transport and metabolism	pfam02065	Melibiase	0.00018										GH27	GH27	3.2.1.22
2061974227	sg4i_00004750	contig18198	Paenibacillus	63830..66424(-)	Beta-glucosidase-related glycosidases	2595bp	864aa	0.67			COG1472	Beta-glucosidase-related glycosidases	2e-59	[G] Carbohydrate transport and metabolism	pfam00933; pfam01915	Glyco_hydro_3; Glyco_hydro_3_C	1.0e-75; 7.4e-48	KO:K05349	beta-glucosidase [EC:3.2.1.21]						3.2.1.21	Beta-glucosidase.	GH3	GH3	3.2.1.21
2062019328	sg4i_00455760	contig00009	Paenibacillus	33273..36074(-)	Beta-glucosidase-related glycosidases	2802bp	933aa	0.64			COG1472	Beta-glucosidase-related glycosidases	1e-38	[G] Carbohydrate transport and metabolism	pfam00933; pfam01915	Glyco_hydro_3; Glyco_hydro_3_C	2.3e-65; 9.9e-46	KO:K05349	beta-glucosidase [EC:3.2.1.21]						3.2.1.21	Beta-glucosidase.	GH3	GH3	3.2.1.21
2062006150	sg4i_00323980	contig00006	Paenibacillus	44614..46785(+)	Beta-glucosidase-related glycosidases	2172bp	723aa	0.65			COG1472	Beta-glucosidase-related glycosidases	5e-63	[G] Carbohydrate transport and metabolism	pfam00933; pfam01915	Glyco_hydro_3; Glyco_hydro_3_C	3.3e-63; 1.4e-63										GH3	GH3	3.2.1.37
2062038347	sg4i_00645950	contig18197	Paenibacillus	91680..93371(-)	beta-N-acetylhexosaminidase (EC:3.2.1.52)	1692bp	563aa	0.69			COG1472	Beta-glucosidase-related glycosidases	2e-77	[G] Carbohydrate transport and metabolism	pfam00933; pfam01915	Glyco_hydro_3; Glyco_hydro_3_C	2.3e-60; 2.0e-07	KO:K01207	beta-N-acetylhexosaminidase [EC:3.2.1.52]						3.2.1.52	Beta-N-acetylhexosaminidase.	GH3	GH3	3.2.1.52
2062033028	sg4i_00592760	contig00137	Paenibacillus	57452..59785(-)	Alpha-glucosidases, family 31 of glycosyl hydrolases	2334bp	777aa	0.65			COG1501	Alpha-glucosidases, family 31 of glycosyl hydrolases		[G] Carbohydrate transport and metabolism	pfam01055	Glyco_hydro_31	1.7e-128	KO:K01811	putative family 31 glucosidase								GH31	GH31	3.2.1.-
2062006178	sg4i_00324260	contig00006	Paenibacillus	86956..89118(+)	Alpha-galactosidase	2163bp	720aa	0.66			COG3345	Alpha-galactosidase		[G] Carbohydrate transport and metabolism	pfam02065	Melibiase		KO:K07407	alpha-galactosidase [EC:3.2.1.22]						3.2.1.22	Alpha-galactosidase.	GH36	GH36	3.2.1.22
2062038283	sg4i_00645310	contig18197	Paenibacillus	16391..18523(-)	hypothetical protein	2133bp	710aa	0.58			COG3408	Glycogen debranching enzyme	5e-06	[G] Carbohydrate transport and metabolism													GH37
2061979649	sg4i_00058970	contig18221	Paenibacillus	22817..24415(-)	Beta-xylosidase	1599bp	532aa	0.61	Yes		COG3664	Beta-xylosidase	1e-91	[G] Carbohydrate transport and metabolism	pfam01229	Glyco_hydro_39		KO:K01198	xylan 1,4-beta-xylosidase [EC:3.2.1.37]		M00102: UDP-Xylose biosynthesis, UDP-Glc => UDP-Xyl => Xyl				3.2.1.37	Xylan 1,4-beta-xylosidase.	GH39	GH39	3.2.1.37
2061976197	sg4i_00024450	contig13308	Paenibacillus	36019..38127(+)	Beta-galactosidase	2109bp	702aa	0.62			COG1874	Beta-galactosidase	1e-102	[G] Carbohydrate transport and metabolism	pfam02449; pfam08532; pfam08533	Glyco_hydro_42; Glyco_hydro_42M; Glyco_hydro_42C	2.7e-125; 7.0e-38; 1.6e-11	KO:K12308	beta-galactosidase [EC:3.2.1.23]						3.2.1.23	Beta-galactosidase.	GH42	GH42	3.2.1.23,3.2.1.-
2061976240	sg4i_00024880	contig18206	Paenibacillus	31304..32284(-)	Beta-xylosidase	981bp	326aa	0.62			COG3507	Beta-xylosidase	1e-14	[G] Carbohydrate transport and metabolism	pfam04616	Glyco_hydro_43	2.6e-36	KO:K01209	alpha-N-arabinofuranosidase [EC:3.2.1.55]						3.2.1.55	Alpha-N-arabinofuranosidase.	GH43	GH43	3.2.1.37
2061979628	sg4i_00058760	contig18221	Paenibacillus	1990..3522(-)	Beta-xylosidase	1533bp	510aa	0.65			COG3507	Beta-xylosidase	7e-60	[G] Carbohydrate transport and metabolism	pfam04616	Glyco_hydro_43	2.1e-52										GH43	GH43	3.2.1.55
2062038365	sg4i_00646130	contig18197	Paenibacillus	113514..114935(-)	Beta-xylosidase	1422bp	473aa	0.62			COG3507	Beta-xylosidase	5e-07	[G] Carbohydrate transport and metabolism	pfam04616	Glyco_hydro_43	4.8e-27										GH43, CBM6	GH43	3.2.1.37,3.2.1.55
[truncated: 813 more rows]

## Sheet: CAZy by bin
CAZy	Thermus	Rhodothermus1	Gemmatimonadetes	Paenibacillus	Rhodothermus2	Thermobaculum	Sphaerobacter1+2	Thermomicrobium	Hyphomicrobium	Not Binned	Sum
[truncated: 130 more rows]

[truncated: 1 more sheets: comparison w other microbiomes]
